# Supplementary material
Source: PubMed Central journal article supplement (PMC2835043)
Supplement: mt2009182x1.pdf [file mt2009182x1.pdf]

Table S1

[Click here to download Supplemental Table: Table S1.pdf](#)

| Affymetrix ID    | Ensembl ID          | Gene Symbol          | Gene Name                                                                                     | RefSeq DNA ID | MGI Ortholog    | RefSeq DNA ID |
|------------------|---------------------|----------------------|-----------------------------------------------------------------------------------------------|---------------|-----------------|---------------|
| <b>Cluster 1</b> |                     |                      |                                                                                               |               |                 |               |
| 1430612_at       | ENSMUSG00000013974  | <b>1810033B17Rik</b> | RIKEN cDNA 1810033B17 gene                                                                    | NM_026985     | <b>C19orf59</b> | NM_174918     |
| 1455965_at       | ENSMUSG00000006403  | <b>Adamts4</b>       | A disintegrin-like and metallopeptidase (reprolysin type) with thrombospondin type 1 motif, 4 | NM_172845     | <b>ADAMTS4</b>  | NM_005099     |
| 1420407_at       | ENSMUSG00000022220  | <b>Adcy4</b>         | Adenylate cyclase 4                                                                           | NM_080435     | <b>ADCY4</b>    | NM_139247     |
| 1418204_s_at     | ENSMUSG00000024397  | <b>Aif1</b>          | Allograft inflammatory factor 1                                                               | NM_019467     | <b>AIF1</b>     | NM_001623     |
| 1447040_at       | ENSMUSG00000022636  | <b>Alcam</b>         | Activated leukocyte cell adhesion molecule                                                    | NM_009655     | <b>ALCAM</b>    | NM_001627     |
| 1457021_x_at     | ENSMUSG00000023047  | <b>Amhr2</b>         | Anti-Mullerian hormone type 2 receptor                                                        | NM_144547     | <b>AMHR2</b>    | NM_020547     |
| 1419549_at       | ENSMUSG00000019987  | <b>Arg1</b>          | Arginase 1, liver                                                                             | NM_007482     | <b>ARG1</b>     | NM_000045     |
| 1449453_at       | ENSMUSG00000029082  | <b>Bst1</b>          | Bone marrow stromal cell antigen 1                                                            | NM_009763     | <b>BST1</b>     | NM_004334     |
| 1424046_at       | ENSMUSG00000027379  | <b>Bub1</b>          | Budding uninhibited by benzimidazoles 1 homolog (S. cerevisiae)                               | NM_009772     | <b>BUB1</b>     | NM_004336     |
| 1416961_at       | ENSMUSG00000040084  | <b>Bub1b</b>         | Budding uninhibited by benzimidazoles 1 homolog, beta (S. cerevisiae)                         | NM_009773     | <b>BUB1B</b>    | NM_001211     |
| 1447363_s_at     | ENSMUSG00000040084  | <b>Bub1b</b>         | Budding uninhibited by benzimidazoles 1 homolog, beta (S. cerevisiae)                         | NM_009773     | <b>BUB1B</b>    | NM_001211     |
| 1442082_at       | ENSMUSG00000040552  | <b>C3ar1</b>         | Complement component 3a receptor 1                                                            | NM_009779     | <b>C3AR1</b>    | NM_004054     |
| 1422029_at       | ENSMUSG00000026166  | <b>Ccl20</b>         | Chemokine (C-C motif) ligand 20                                                               | NM_016960     | <b>CCL20</b>    | NM_004591     |
| 1419943_s_at     | ENSMUSG00000041431  | <b>Ccnb1</b>         | Cyclin B1                                                                                     | NM_172301     | <b>CCNB1</b>    | NM_031966     |
| 1460218_at       | ENSMUSG00000000682  | <b>Cd52</b>          | CD52 antigen                                                                                  | NM_013706     | <b>CD52</b>     | NM_001803     |
| 1428069_at       | ENSMUSG000000055612 | <b>Cdca7</b>         | Cell division cycle associated 7                                                              | NM_025866     | <b>CDCA7</b>    | NM_031942     |
| 1417795_at       | ENSMUSG00000030077  | <b>Chl1</b>          | Cell adhesion molecule with homology to L1CAM                                                 | NM_007697     | <b>CHL1</b>     | NM_006614     |
| 1417457_at       | ENSMUSG00000062248  | <b>Cks2</b>          | CDC28 protein kinase regulatory subunit 2                                                     | NM_025415     | <b>CKS2</b>     | NM_001827     |
| 1417853_at       | ENSMUSG00000056025  | <b>Clca1</b>         | Chloride channel calcium activated 1                                                          | NM_009899     | <b>CLCA1</b>    | NM_001285     |
| 1450476_at       | ENSMUSG00000062585  | <b>Cnr2</b>          | Cannabinoid receptor 2 (macrophage)                                                           | NM_009924     | <b>CNR2</b>     | NM_001841     |
| 1431089_at       | ENSMUSG00000041781  | <b>Cpsf2</b>         | Cleavage and polyadenylation specific factor 2                                                | NM_016856     | <b>CPSF2</b>    | NM_017437     |
| 1419209_at       | ENSMUSG00000029380  | <b>Cxcl1</b>         | Chemokine (C-X-C motif) ligand 1                                                              | NM_008176     | <b>CXCL1</b>    | NM_002089     |
| 1418457_at       | ENSMUSG00000021508  | <b>Cxcl14</b>        | Chemokine (C-X-C motif) ligand 14                                                             | NM_019568     | <b>CXCL14</b>   | NM_004887     |
| 1449984_at       | ENSMUSG00000058427  | <b>Cxcl2</b>         | Chemokine (C-X-C motif) ligand 2                                                              | NM_009140     | <b>CXCL2</b>    | NM_002089     |
| 1437121_at       | ENSMUSG00000002668  | <b>Dendd1c</b>       | DENN/MADD domain containing 1C                                                                | NM_153551     | <b>DENND1C</b>  | NM_024898     |
| 1437356_at       | ENSMUSG00000051212  | <b>Gpr183</b>        | G protein-coupled receptor 183                                                                | NM_183031     | <b>GPR183</b>   | NM_004951     |
| 1415811_at       | ENSMUSG000000048621 | <b>EG434907</b>      | Predicted gene, EG622976                                                                      | NM_001037917  |                 |               |
| 1439377_x_at     | ENSMUSG00000006390  | <b>Elov11</b>        | Elongation of very long chain fatty acids (FEN1/Elo2, SUR4/Elo3, yeast)-like 1                | NM_001039175  | <b>ELOVL1</b>   |               |
| 1418411_at       | ENSMUSG00000033313  | <b>Fbxl8</b>         | F-box and leucine-rich repeat protein 8                                                       | NM_015821     | <b>FBXL8</b>    | NM_018378     |
| 1422430_at       | ENSMUSG00000035455  | <b>Figl1</b>         | Fidgetin-like 1                                                                               | NM_021891     | <b>FIGNL1</b>   | NM_022116     |
| 1452881_at       | ENSMUSG00000031821  | <b>Gins2</b>         | GINS complex subunit 2 (Psf2 homolog)                                                         | NM_178856     | <b>GINS2</b>    | NM_016095     |
| 1438009_at       | ENSMUSG00000069304  | <b>Histh2ao</b>      | Histone cluster 1, H2ao                                                                       | NM_178185     |                 |               |
| 1448731_at       | ENSMUSG00000032089  | <b>Il10ra</b>        | Interleukin 10 receptor, alpha                                                                | NM_008348     | <b>IL10RA</b>   | NM_001558     |
| 1421034_a_at     | ENSMUSG00000030748  | <b>Il4ra</b>         | Interleukin 4 receptor, alpha                                                                 | NM_001008700  | <b>IL4R</b>     | NM_000418     |
| 1451128_s_at     | ENSMUSG00000030677  | <b>Kif22</b>         | Kinesin family member 22                                                                      | NM_145588     | <b>KIF22</b>    | NM_007317     |
| 1434955_at       | ENSMUSG00000036469  | <b>March1</b>        | Membrane-associated ring finger (C3HC4) 1                                                     | NM_175188     | <b>MARCH1</b>   | NM_017923     |
| 1440209_at       | ENSMUSG00000036469  | <b>March1</b>        | Membrane-associated ring finger (C3HC4) 1                                                     | NM_175188     | <b>MARCH1</b>   | NM_017923     |
| 1436808_x_at     | ENSMUSG00000005410  | <b>Mcm5</b>          | Minichromosome maintenance deficient 5, cell division cycle 46 (S. cerevisiae)                | NM_008566     | <b>MCM5</b>     | NM_006739     |
| 1426817_at       | ENSMUSG00000031004  | <b>Mki67</b>         | Antigen identified by monoclonal antibody Ki 67                                               | NM_001081117  | <b>MKI67</b>    |               |
| 1452816_at       | ENSMUSG00000031629  | <b>Mlf1ip</b>        | Myeloid leukemia factor 1 interacting protein                                                 | NM_027973     | <b>MLF1IP</b>   | NM_024629     |
| 1419598_at       | ENSMUSG00000024679  | <b>Ms4a6d</b>        | Membrane-spanning 4-domains, subfamily A, member 6D                                           | NM_026835     |                 |               |
| 1419599_s_at     | ENSMUSG00000024679  | <b>Ms4a6d</b>        | Membrane-spanning 4-domains, subfamily A, member 6D                                           | NM_026835     |                 |               |
| 1422062_at       | ENSMUSG00000025044  | <b>Msr1</b>          | Macrophage scavenger receptor 1                                                               | NM_031195     | <b>MSR1</b>     | NM_138715     |
| 1429171_a_at     | ENSMUSG00000015880  | <b>Ncapg</b>         | On-SMC condensin I complex, subunit G                                                         | NM_019438     | <b>NCAPG</b>    | NM_022346     |
| 1430811_a_at     | ENSMUSG00000026683  | <b>Nuf2</b>          | NUF2, NDC80 kinetochore complex component, homolog (S. cerevisiae)                            | NM_023284     | <b>NUF2</b>     | NM_031423     |
| 1437060_at       | ENSMUSG00000022026  | <b>Olfm4</b>         | Olfactomedin 4                                                                                | NM_001030294  | <b>OLFM4</b>    | NM_006418     |
| 1441918_x_at     | ENSMUSG00000069248  | <b>OTTMUSG000000</b> | Predicted gene, OTTMUSG00000000720                                                            | NM_001045535  |                 |               |
| 1460437_at       | ENSMUSG00000018008  | <b>Pscd4</b>         | Pleckstrin homology, Sec7 and coiled/coil domains 4                                           | NM_028195     | <b>PSCD4</b>    | NM_013385     |

|                  |                    |                      |                                                                                 |              |                 |              |
|------------------|--------------------|----------------------|---------------------------------------------------------------------------------|--------------|-----------------|--------------|
| 1451206_s_at     | ENSMUSG00000026832 | <i>Pscdbp</i>        | Pleckstrin homology, Sec7 and coiled-coil domains, binding protein              | NM_139200    | <i>PSCDBP</i>   | NM_004288    |
| 1434437_x_at     | ENSMUSG00000020649 | <i>Rrm2</i>          | Ribonucleotide reductase M2                                                     | NM_009104    | <i>RRM2</i>     | NM_001034    |
| 1448226_at       | ENSMUSG00000020649 | <i>Rrm2</i>          | Ribonucleotide reductase M2                                                     | NM_009104    | <i>RRM2</i>     | NM_001034    |
| 1418919_at       | ENSMUSG00000023940 | <i>Sgoll</i>         | Shugoshin-like 1 (S. pombe)                                                     | NM_028232    | <i>SGOLI</i>    | NM_138484    |
| 1448025_at       | ENSMUSG00000044138 | <i>Sirpb1</i>        | Signal-regulatory protein beta 1                                                | NM_001002898 |                 |              |
| 1458683_at       | ENSMUSG00000044138 | <i>Sirpb1</i>        | Signal-regulatory protein beta 1                                                | NM_001002898 |                 |              |
| 1457402_at       | ENSMUSG00000016918 | <i>Sulf1</i>         | Sulfatase 1                                                                     | NM_172294    | <i>SULF1</i>    | NM_015170    |
| 1418424_at       | ENSMUSG00000053475 | <i>Tnfaip6</i>       | Tumor necrosis factor alpha induced protein 6                                   | NM_009398    | <i>TNFAIP6</i>  | NM_007115    |
| 1423310_at       | ENSMUSG00000035274 | <i>Tpbg</i>          | Trophoblast glycoprotein                                                        | NM_011627    | <i>TPBG</i>     | NM_006670    |
| 1416311_s_at     | ENSMUSG00000067702 | <i>Tuba3a</i>        | Tubulin, alpha 3A                                                               | NM_009446    |                 |              |
| <b>Cluster 2</b> |                    |                      |                                                                                 |              |                 |              |
| 1451340_at       | ENSMUSG00000024803 | <i>Arid5a</i>        | AT rich interactive domain 5A (Mrf1 like)                                       | NM_145996    | <i>ARID5A</i>   | NM_212481    |
| 1420380_at       | ENSMUSG00000037447 | <i>Ccl2</i>          | Chemokine (C-C motif) ligand 2                                                  | NM_011333    | <i>CCL2</i>     | NM_002982    |
| 1421228_at       | ENSMUSG00000035385 | <i>Ccl7</i>          | Chemokine (C-C motif) ligand 7                                                  | NM_013654    | <i>CCL7</i>     | NM_006273    |
| 1421186_at       | ENSMUSG00000035373 | <i>Ccr2</i>          | Chemokine (C-C motif) receptor 2                                                | NM_009915    | <i>CCR2</i>     | NM_000647    |
| 1457644_s_at     | ENSMUSG00000049103 | <i>Cxcl1</i>         | Chemokine (C-X-C motif) ligand 1                                                | NM_008176    | <i>CXCL1</i>    | NM_002089    |
| 1441887_x_at     | ENSMUSG00000029380 | <i>EG622976</i>      | Predicted gene, EG622976                                                        | NM_001037917 |                 |              |
| 1420591_at       | ENSMUSG00000063234 | <i>Gpr84</i>         | G protein-coupled receptor 84                                                   | NM_030720    | <i>GPR84</i>    | NM_020370    |
| 1450297_at       | ENSMUSG00000025746 | <i>Il6</i>           | Interleukin 6                                                                   | NM_031168    | <i>IL6</i>      | NM_000600    |
| 1456064_at       | ENSMUSG00000047959 | <i>Kcna3</i>         | Potassium voltage-gated channel, shaker-related subfamily, member 3             | NM_008418    | <i>KCNA3</i>    | NM_002232    |
| 1417262_at       | ENSMUSG00000032487 | <i>Ptgs2</i>         | Prostaglandin-endoperoxide synthase 2                                           | NM_011198    | <i>PTGS2</i>    | NM_000963    |
| 1422562_at       | ENSMUSG00000031880 | <i>Rrad</i>          | Ras-related associated with diabetes                                            | NM_019662    | <i>RRAD</i>     | NM_004165    |
| 1416318_at       | ENSMUSG00000044734 | <i>Serpina1a</i>     | Serine (or cysteine) peptidase inhibitor, clade B, member 1a                    | NM_025429    | <i>SERPINA1</i> | NM_030666    |
| 1450142_a_at     | ENSMUSG00000005043 | <i>Sgsh</i>          | N-sulfoglucosamine sulfohydrolase (sulfamidase)                                 | NM_018822    | <i>SGSH</i>     | NM_000199    |
| 1455899_x_at     | ENSMUSG00000053113 | <i>Socs3</i>         | Suppressor of cytokine signaling 3                                              | NM_007707    | <i>SOCS3</i>    | NM_003955    |
| 1434430_s_at     | ENSMUSG00000014243 | <i>Zswim7</i>        | Zinc finger, SWIM-type containing 7                                             |              |                 |              |
| <b>Cluster 3</b> |                    |                      |                                                                                 |              |                 |              |
| 1420991_at       | ENSMUSG00000024803 | <i>Ankrd1</i>        | Ankyrin repeat domain 1 (cardiac muscle)                                        | NM_013468    | <i>ANKRD1</i>   | NM_014391    |
| 1420992_at       | ENSMUSG00000024803 | <i>Ankrd1</i>        | Ankyrin repeat domain 1 (cardiac muscle)                                        | NM_013468    | <i>ANKRD1</i>   | NM_014391    |
| 1440718_at       | ENSMUSG00000056069 | <i>Fam105a</i>       | Family with sequence similarity 105, member A                                   | NM_198301    | <i>FAM105A</i>  | NM_019018    |
| 1424971_at       | ENSMUSG00000069910 | <i>Ccdc99</i>        | Coiled-coil domain containing 99                                                | NM_027411    | <i>CCDC99</i>   | NM_017785    |
| 1438852_x_at     | ENSMUSG00000026355 | <i>Mcm6</i>          | Minichromosome maintenance deficient 6 (MIS5 homolog, S. pombe) (S. cerevisiae) | NM_008567    | <i>MCM6</i>     | NM_005915    |
| 1450291_s_at     | ENSMUSG00000024675 | <i>Ms4a4c</i>        | Membrane-spanning 4-domains, subfamily A, member 4C                             | NM_029499    |                 |              |
| 1415810_at       | ENSMUSG00000001228 | <i>Uhrf1</i>         | Ubiquitin-like, containing PHD and RING finger domains, 1                       | NM_010931    | <i>UHRF1</i>    | NM_013282    |
| 1434431_x_at     | ENSMUSG00000014243 | <i>Zswim7</i>        | Zinc finger, SWIM-type containing 7                                             |              |                 |              |
| <b>Cluster 4</b> |                    |                      |                                                                                 |              |                 |              |
| 1435584_at       | ENSMUSG00000054293 | <i>A630033H20Rik</i> | RIKEN cDNA A630033H20 gene                                                      | NM_175442    |                 |              |
| 1418655_at       | ENSMUSG00000006731 | <i>B4galnt1</i>      | Beta-1,4-N-acetyl-galactosaminyl transferase 1                                  | NM_008080    | <i>B4GALNT1</i> | NM_001478    |
| 1426959_at       | ENSMUSG00000046598 | <i>Bdh1</i>          | 3-hydroxybutyrate dehydrogenase, type 1                                         | NM_175177    | <i>BDH1</i>     | NM_004051    |
| 1444646_at       | ENSMUSG00000028487 | <i>Bnc2</i>          | Basonuclin 2                                                                    | NM_172870    | <i>BNC2</i>     | NM_017637    |
| 1422606_at       | ENSMUSG00000058914 | <i>Clqtcf3</i>       | Clq and tumor necrosis factor related protein 3                                 | NM_030888    | <i>CIQTNF3</i>  | NM_030945    |
| 1450757_at       | ENSMUSG00000031673 | <i>Cdh11</i>         | Cadherin 11                                                                     | NM_009866    | <i>CDH11</i>    | NM_001797    |
| 1418852_at       | ENSMUSG00000027107 | <i>Chrna1</i>        | Cholinergic receptor, nicotinic, alpha polypeptide 1 (muscle)                   | NM_007389    | <i>CHRNA1</i>   | NM_000079    |
| 1437270_a_at     | ENSMUSG00000040663 | <i>Clefi</i>         | Cardiotrophin-like cytokine factor 1                                            | NM_019952    | <i>CLCF1</i>    | NM_013246    |
| 1425951_a_at     | ENSMUSG00000023349 | <i>Clec4n</i>        | C-type lectin domain family 4, member n                                         | NM_020001    | <i>CLEC4E</i>   | NM_001007033 |
| 1438148_at       | ENSMUSG00000029379 | <i>Cxcl3</i>         | Chemokine (C-X-C motif) ligand 3                                                | NM_203320    | <i>CXCL3</i>    | NM_002090    |
| 1433964_s_at     | ENSMUSG00000024965 | <i>Fermt3</i>        | Fermitin family homolog 3 (Drosophila)                                          | NM_153795    | <i>FERMT3</i>   | NM_031471    |
| 1416693_at       | ENSMUSG00000046714 | <i>Foxc2</i>         | Forkhead box C2                                                                 | NM_013519    | <i>FOXC2</i>    | NM_005251    |

|              |                    |                |                                                               |              |                |           |
|--------------|--------------------|----------------|---------------------------------------------------------------|--------------|----------------|-----------|
| 1418842_at   | ENSMUSG00000022831 | <b>Hcls1</b>   | Hematopoietic cell specific Lyn substrate 1                   | NM_008225    | <b>HCLS1</b>   | NM_005335 |
| 1417484_at   | ENSMUSG00000029306 | <b>Ibsp</b>    | Integrin binding sialoprotein                                 | NM_008318    | <b>IBSP</b>    | NM_004967 |
| 1435354_at   | ENSMUSG00000062609 | <b>Kcnj15</b>  | Potassium inwardly-rectifying channel, subfamily J, member 15 | NM_001034145 | <b>KCNJ15</b>  | NM_002243 |
| 1436055_at   | ENSMUSG00000052316 | <b>Lrrc15</b>  | Leucine rich repeat containing 15                             | NM_028973    | <b>LRRC15</b>  | NM_130830 |
| 1417256_at   | ENSMUSG00000050578 | <b>Mmp13</b>   | Matrix metalloproteinase 13                                   | NM_008607    | <b>MMP13</b>   | NM_002427 |
| 1422643_at   | ENSMUSG00000020000 | <b>Moxd1</b>   | Monoxygenase, DBH-like 1                                      | NM_021509    | <b>MOXD1</b>   | NM_015529 |
| 1428304_at   | ENSMUSG00000022033 | <b>Pbk</b>     | PDZ binding kinase                                            | NM_023209    | <b>PBK</b>     | NM_018492 |
| 1456710_at   | ENSMUSG00000051486 | <b>Pcdhb11</b> | Protocadherin beta 11                                         | NM_053136    |                |           |
| 1448961_at   | ENSMUSG00000032372 | <b>Plscr2</b>  | Phospholipid scramblase 2                                     | NM_008880    |                |           |
| 1418203_at   | ENSMUSG00000024521 | <b>Pmaip1</b>  | Phorbol-12-myristate-13-acetate-induced protein 1             | NM_021451    | <b>PMAIP1</b>  | NM_021127 |
| 1438306_at   | ENSMUSG00000021720 | <b>Rnf180</b>  | Ring finger protein 180                                       | NM_027934    | <b>RNF180</b>  | NM_178532 |
| 1455893_at   | ENSMUSG00000051920 | <b>Rspo2</b>   | R-spondin 2 homolog (Xenopus laevis)                          | NM_172815    | <b>RSPO2</b>   | NM_178565 |
| 1424704_at   | ENSMUSG00000039153 | <b>Runx2</b>   | Runt related transcription factor 2                           | NM_009820    | <b>RUNX2</b>   | NM_004348 |
| 1440173_x_at | ENSMUSG00000026580 | <b>Selp</b>    | Selectin, platelet                                            | NM_011347    | <b>SELP</b>    | NM_003005 |
| 1419083_at   | ENSMUSG00000022015 | <b>Tnfsf11</b> | Tumor necrosis factor (ligand) superfamily, member 11         | NM_011613    | <b>TNFSF11</b> | NM_003701 |
| 1418176_at   | ENSMUSG00000022479 | <b>Vdr</b>     | Vitamin D receptor                                            | NM_009504    | <b>VDR</b>     | NM_000376 |

#### Cluster 5

|              |                    |                      |                                                                                           |              |                 |           |
|--------------|--------------------|----------------------|-------------------------------------------------------------------------------------------|--------------|-----------------|-----------|
| 1459759_s_at | ENSMUSG00000032900 | <b>1700065I17Rik</b> | RIKEN cDNA 1700065I17 gene                                                                | NM_026099    | <b>C5orf48</b>  | NM_207408 |
| 1433998_at   | ENSMUSG00000020807 | <b>4933427D14Rik</b> | RIKEN cDNA 4933427D14 gene                                                                | NM_028963    | <b>KIAA0753</b> | NM_014804 |
| 1452732_at   | ENSMUSG00000033508 | <b>Asprv1</b>        | Aspartic peptidase, retroviral-like 1                                                     | NM_026414    | <b>ASPRV1</b>   | NM_152792 |
| 1419004_s_at | ENSMUSG00000074145 | <b>Bcl2a1b</b>       | B-cell leukemia/lymphoma 2 related protein A1b                                            | NM_007534    |                 |           |
| 1424278_a_at | ENSMUSG00000017716 | <b>Birc5</b>         | Baculoviral IAP repeat-containing 5                                                       | NM_009689    | <b>BIRC5</b>    | NM_001168 |
| 1421307_at   | ENSMUSG00000027555 | <b>Car13</b>         | Carbonic anhydrase 13                                                                     | NM_024495    | <b>CA13</b>     | NM_198584 |
| 1419282_at   | ENSMUSG00000035352 | <b>Ccl12</b>         | Chemokine (C-C motif) ligand 12                                                           | NM_011331    |                 |           |
| 1448205_at   | ENSMUSG00000041431 | <b>Ccnb1</b>         | Cyclin B1                                                                                 | NM_172301    | <b>CCNB1</b>    | NM_031966 |
| 1422191_at   | ENSMUSG00000022667 | <b>CD200r1</b>       | CD200 receptor 1                                                                          | NM_021325    |                 |           |
| 1448314_at   | ENSMUSG00000019942 | <b>Cdc2a</b>         | Cell division cycle 2 homolog A (S. pombe)                                                | NM_007659    | <b>CDC2</b>     | NM_001786 |
| 1417019_a_at | ENSMUSG00000017499 | <b>Cdc6</b>          | Cell division cycle 6 homolog (S. cerevisiae)                                             | NM_011799    | <b>CDC6</b>     | NM_001254 |
| 1428481_s_at | ENSMUSG00000028873 | <b>Cdca8</b>         | Cell division cycle associated 8                                                          | NM_026560    | <b>CDCA8</b>    | NM_018101 |
| 1424144_at   | ENSMUSG0000006585  | <b>Cdt1</b>          | Chromatin licensing and DNA replication factor 1                                          | NM_026014    | <b>CDT1</b>     | NM_030928 |
| 1435190_at   | ENSMUSG00000030077 | <b>Chl1</b>          | Cell adhesion molecule with homology to L1CAM                                             | NM_007697    | <b>CHL1</b>     | NM_006614 |
| 1420804_s_at | ENSMUSG00000030144 | <b>Clec4d</b>        | C-type lectin domain family 4, member d                                                   | NM_010819    | <b>CLEC4D</b>   | NM_080387 |
| 1420330_at   | ENSMUSG00000030142 | <b>Clec4e</b>        | C-type lectin domain family 4, member e                                                   | NM_019948    | <b>CLEC4E</b>   | NM_014358 |
| 1420699_at   | ENSMUSG00000079293 | <b>Clec7a</b>        | C-type lectin domain family 7, member a                                                   | NM_020008    | <b>CLEC7A</b>   | NM_022570 |
| 1416246_a_at | ENSMUSG00000030707 | <b>Coro1a</b>        | Coronin, actin binding protein 1A                                                         | NM_009898    | <b>CORO1A</b>   | NM_007074 |
| 1455269_a_at | ENSMUSG00000030707 | <b>Coro1a</b>        | Coronin, actin binding protein 1A                                                         | NM_009898    | <b>CORO1A</b>   | NM_007074 |
| 1419728_at   | ENSMUSG00000029371 | <b>Cxcl5</b>         | Chemokine (C-X-C motif) ligand 5                                                          | NM_009141    | <b>CXCL6</b>    | NM_002993 |
| 1427076_at   | ENSMUSG00000039982 | <b>Dtx4</b>          | Deltex 4 homolog (Drosophila)                                                             | NM_172442    | <b>DTX4</b>     | NM_015177 |
| 1426505_at   | ENSMUSG00000070354 | <b>Evi2b</b>         | Ecotropic viral integration site 2b                                                       | NM_146023    | <b>EVI2B</b>    | NM_006495 |
| 1420590_at   | ENSMUSG00000003665 | <b>Has1</b>          | Hyaluronan synthase 1                                                                     | NM_008215    | <b>HAS1</b>     | NM_001523 |
| 1424254_at   | ENSMUSG00000025491 | <b>Ifit1</b>         | Interferon induced transmembrane protein 1                                                | NM_026820    | <b>IFITM1</b>   | NM_003641 |
| 1436312_at   | ENSMUSG00000018654 | <b>Ikzf1</b>         | IKAROS family zinc finger 1                                                               | NM_001025597 | <b>IKZF1</b>    | NM_006060 |
| 1427164_at   | ENSMUSG00000017057 | <b>Il13ra1</b>       | Interleukin 13 receptor, alpha 1                                                          | NM_133990    | <b>IL13RA1</b>  | NM_001560 |
| 1427165_at   | ENSMUSG00000017057 | <b>Il13ra1</b>       | Interleukin 13 receptor, alpha 1                                                          | NM_133990    | <b>IL13RA1</b>  | NM_001560 |
| 1449399_a_at | ENSMUSG00000027398 | <b>Il1b</b>          | Interleukin 1 beta                                                                        | NM_008361    | <b>IL1B</b>     | NM_000576 |
| 1451798_at   | ENSMUSG00000026981 | <b>Il1rn</b>         | Interleukin 1 receptor antagonist                                                         | NM_001039701 | <b>IL1RN</b>    | NM_000577 |
| 1423996_a_at | ENSMUSG00000030748 | <b>Il4ra</b>         | Interleukin 4 receptor, alpha                                                             | NM_001008700 | <b>IL4R</b>     | NM_000418 |
| 1435945_a_at | ENSMUSG00000054342 | <b>Kcnn4</b>         | Potassium intermediate/small conductance calcium-activated channel, subfamily N, member 4 | NM_008433    | <b>KCNN4</b>    | NM_002250 |
| 1449602_at   | ENSMUSG00000054920 | <b>Klhl5</b>         | Kelch-like 5 (Drosophila)                                                                 | NM_175174    |                 |           |
| 1427747_a_at | ENSMUSG00000026822 | <b>Lcn2</b>          | Lipocalin 2                                                                               | NM_008491    | <b>LCN2</b>     | NM_005564 |

|                  |                     |                 |                                                                                       |              |                 |              |
|------------------|---------------------|-----------------|---------------------------------------------------------------------------------------|--------------|-----------------|--------------|
| 1415983_at       | ENSMUSG00000021998  | <b>Lcp1</b>     | Lymphocyte cytosolic protein 1                                                        | NM_008879    | <b>LCPI</b>     | NM_002298    |
| 1448160_at       | ENSMUSG00000021998  | <b>Lcp1</b>     | Lymphocyte cytosolic protein 1                                                        | NM_008879    | <b>LCPI</b>     | NM_002298    |
| 1420394_s_at     | ENSMUSG00000062593  | <b>Lilrb4</b>   | Leukocyte immunoglobulin-like receptor, subfamily B, member 4                         | NM_008147    |                 |              |
| 1416121_at       | ENSMUSG00000024529  | <b>Lox</b>      | Lysyl oxidase                                                                         | NM_010728    | <b>LOX</b>      | NM_002317    |
| 1448228_at       | ENSMUSG00000024529  | <b>Lox</b>      | Lysyl oxidase                                                                         | NM_010728    | <b>LOX</b>      | NM_002317    |
| 1434945_at       | ENSMUSG00000033192  | <b>Lpcat2</b>   | Lysophosphatidylcholine acyltransferase 2                                             | NM_173014    | <b>LPCAT2</b>   | NM_017839    |
| 1425548_a_at     | ENSMUSG00000073412  | <b>Lst1</b>     | Leukocyte specific transcript 1                                                       | NM_010734    | <b>LST1</b>     | NM_007161    |
| 1424754_at       | ENSMUSG00000024672  | <b>Ms4a7</b>    | Membrane-spanning 4-domains, subfamily A, member 7                                    | NM_027836    | <b>MS4A7</b>    | NM_021201    |
| 1429172_a_at     | ENSMUSG00000015880  | <b>Ncapg</b>    | On-SMC condensin I complex, subunit G                                                 | NM_019438    | <b>NCAPG</b>    | NM_022346    |
| 1452001_at       | ENSMUSG00000058794  | <b>Nfe2</b>     | Nuclear factor, erythroid derived 2                                                   | NM_008685    | <b>NFE2</b>     | NM_006163    |
| 1458299_s_at     | ENSMUSG00000023947  | <b>Nfkbie</b>   | Nuclear factor of kappa light polypeptide gene enhancer in B-cells inhibitor, epsilon | NM_008690    | <b>NFKBIE</b>   | NM_004556    |
| 1432591_at       | ENSMUSG00000028370  | <b>Pappa</b>    | Pregnancy-associated plasma protein A                                                 | NM_021362    | <b>PAPPA</b>    | NM_002581    |
| 1422708_at       | ENSMUSG00000020573  | <b>Pik3cg</b>   | Phosphoinositide-3-kinase, catalytic, gamma polypeptide                               | NM_020272    | <b>PIK3CG</b>   | NM_002649    |
| 1435697_a_at     | ENSMUSG00000026832  | <b>Cytip</b>    | Cytohesin 1 interacting protein                                                       | NM_139200    | <b>CYTIP</b>    | NM_004288    |
| 1422124_a_at     | ENSMUSG00000026395  | <b>Ptprc</b>    | Protein tyrosine phosphatase, receptor type, C                                        | NM_011210    | <b>PTPRC</b>    | NM_002838    |
| 1440165_at       | ENSMUSG00000026395  | <b>Ptprc</b>    | Protein tyrosine phosphatase, receptor type, C                                        | NM_011210    | <b>PTPRC</b>    | NM_002838    |
| 1422637_at       | ENSMUSG00000026430  | <b>Rassf5</b>   | Ras association (RalGDS/AF-6) domain family 5                                         | NM_018750    | <b>RASSF5</b>   | NM_182663    |
| 1420558_at       | ENSMUSG00000026580  | <b>Selp</b>     | Selectin, platelet                                                                    | NM_011347    | <b>SELP</b>     | NM_003005    |
| 1454764_s_at     | ENSMUSG00000075444  | <b>Slc38a1</b>  | Solute carrier family 38, member 1                                                    | NM_134086    | <b>SLC38A1</b>  | NM_001077484 |
| 1427035_at       | ENSMUSG00000022094  | <b>Slc39a14</b> | Solute carrier family 39 (zinc transporter), member 14                                | NM_144808    | <b>SLC39A14</b> | NM_015359    |
| 1438490_at       | ENSMUSG00000022094  | <b>Slc39a14</b> | Solute carrier family 39 (zinc transporter), member 14                                | NM_144808    | <b>SLC39A14</b> | NM_015359    |
| 1427102_at       | ENSMUSG00000000204  | <b>Slfn4</b>    | Schlafen 4                                                                            | NM_011410    |                 |              |
| 1424118_a_at     | ENSMUSG00000005233  | <b>Spc25</b>    | SPC25, NDC80 kinetochore complex component, homolog (S. cerevisiae)                   | NM_025565    | <b>SPC25</b>    | NM_020675    |
| 1460227_at       | ENSMUSG00000001131  | <b>Timp1</b>    | Tissue inhibitor of metalloproteinase 1                                               | NM_001044384 | <b>TIMP1</b>    | NM_003254    |
| 1456344_at       | ENSMUSG00000028364  | <b>Tnc</b>      | Tenascin C                                                                            | NM_011607    | <b>TNC</b>      | NM_002160    |
| 1450792_at       | ENSMUSG00000030579  | <b>Tyrobp</b>   | TYRO protein tyrosine kinase binding protein                                          | NM_011662    | <b>TYROBP</b>   | NM_003332    |
| 1442651_at       | ENSMUSG00000004637  | <b>Wwox</b>     | WW domain-containing oxidoreductase                                                   | NM_019573    | <b>WWOX</b>     | NM_016373    |
| <b>Cluster 6</b> |                     |                 |                                                                                       |              |                 |              |
| 1455338_at       | ENSMUSG00000047878  | <b>A4galt</b>   | Alpha 1,4-galactosyltransferase                                                       | NM_001004150 | <b>A4GALT</b>   | NM_017436    |
| 1424940_s_at     | ENSMUSG00000037594  | <b>BC022687</b> | CDNA sequence BC022687                                                                | NM_145450    | <b>C14orf79</b> | NM_174891    |
| 1418847_at       | ENSMUSG00000021125  | <b>Arg2</b>     | Arginase type II                                                                      | NM_009705    | <b>ARG2</b>     | NM_001172    |
| 1449454_at       | ENSMUSG00000029082  | <b>Bst1</b>     | Bone marrow stromal cell antigen 1                                                    | NM_009763    | <b>BST1</b>     | NM_004334    |
| 1451537_at       | ENSMUSG00000064246  | <b>Chi3l1</b>   | Chitinase 3-like 1                                                                    | NM_007695    | <b>CHI3L1</b>   | NM_001276    |
| 1451191_at       | ENSMUSG00000004885  | <b>Crabp2</b>   | Cellular retinoic acid binding protein II                                             | NM_007759    | <b>CRABP2</b>   | NM_001878    |
| 1418806_at       | ENSMUSG00000028859  | <b>Csf3r</b>    | Colony stimulating factor 3 receptor (granulocyte)                                    | NM_007782    | <b>CSF3R</b>    | NM_000760    |
| 1452968_at       | ENSMUSG00000054196  | <b>Cthrc1</b>   | Collagen triple helix repeat containing 1                                             | NM_026778    | <b>CTHRC1</b>   | NM_138455    |
| 1419219_at       | ENSMUSG00000003484  | <b>Cyp4f18</b>  | Cytochrome P450, family 4, subfamily f, polypeptide 18                                | NM_024444    | <b>CYP4F3</b>   | NM_000896    |
| 1421074_at       | ENSMUSG00000039519  | <b>Cyp7b1</b>   | Cytochrome P450, family 7, subfamily b, polypeptide 1                                 | NM_007825    | <b>CYP7B1</b>   | NM_004820    |
| 1415857_at       | ENSMUSG00000021728  | <b>Emb</b>      | Embigin                                                                               | NM_010330    | <b>EMB</b>      | NM_198449    |
| 1459369_at       | ENSMUSG00000055540  | <b>Epha6</b>    | Eph receptor A6                                                                       | NM_007938    | <b>EPHA6</b>    | NM_001080448 |
| 1450043_at       | ENSMUSG000000041075 | <b>Fzd7</b>     | Frizzled homolog 7 (Drosophila)                                                       | NM_008057    | <b>FZD7</b>     | NM_003507    |
| 1449619_s_at     | ENSMUSG00000025407  | <b>Gli1</b>     | GLI-Kruppel family member GLI1                                                        | NM_010296    | <b>GLI1</b>     | NM_005269    |
| 1443253_at       | ENSMUSG00000052942  | <b>Glis3</b>    | GLIS family zinc finger 3                                                             | NM_175459    | <b>GLIS3</b>    | NM_152629    |
| 1454713_s_at     | ENSMUSG00000027360  | <b>Hdc</b>      | Histidine decarboxylase                                                               | NM_008230    | <b>HDC</b>      | NM_002112    |
| 1422317_a_at     | ENSMUSG00000026069  | <b>Il1rl1</b>   | Interleukin 1 receptor-like 1                                                         | NM_001025602 | <b>IL1RL1</b>   | NM_003856    |
| 1416296_at       | ENSMUSG000000031304 | <b>Il2rg</b>    | Interleukin 2 receptor, gamma chain                                                   | NM_013563    | <b>IL2RG</b>    | NM_000206    |
| 1421734_at       | ENSMUSG00000026180  | <b>Il8rb</b>    | Interleukin 8 receptor, beta                                                          | NM_009909    | <b>IL8RB</b>    | NM_001557    |
| 1427381_at       | ENSMUSG00000022126  | <b>Irg1</b>     | Immunoresponsive gene 1                                                               | NM_008392    | <b>IRG1</b>     |              |
| 1449207_a_at     | ENSMUSG00000003779  | <b>Kif20a</b>   | Kinesin family member 20A                                                             | NM_009004    | <b>KIF20A</b>   | NM_005733    |
| 1419135_at       | ENSMUSG00000024399  | <b>Lib</b>      | Lymphotoxin B                                                                         | NM_008518    | <b>LTB</b>      | NM_009588    |

|              |                     |                |                                                                                     |           |                |           |
|--------------|---------------------|----------------|-------------------------------------------------------------------------------------|-----------|----------------|-----------|
| 1418061_at   | ENSMUSG00000002020  | <b>Ltbp2</b>   | Latent transforming growth factor beta binding protein 2                            | NM_013589 | <b>LTBP2</b>   | NM_000428 |
| 1424010_at   | ENSMUSG00000001034  | <b>Mapk7</b>   | Mitogen activated protein kinase 7                                                  | NM_011841 | <b>MAPK7</b>   | NM_002749 |
| 1418945_at   | ENSMUSG000000043613 | <b>Mmp3</b>    | Matrix metalloproteinase 3                                                          | NM_010809 | <b>MMP3</b>    | NM_002422 |
| 1448291_at   | ENSMUSG000000017737 | <b>Mmp9</b>    | Matrix metalloproteinase 9                                                          | NM_013599 | <b>MMP9</b>    | NM_004994 |
| 1421044_at   | ENSMUSG000000020695 | <b>Mrc2</b>    | Mannose receptor, C type 2                                                          | NM_008626 | <b>MRC2</b>    | NM_006039 |
| 1455104_at   | ENSMUSG00000001156  | <b>Mxd1</b>    | MAX dimerization protein 1                                                          | NM_010751 | <b>MXD1</b>    | NM_002357 |
| 1426864_a_at | ENSMUSG000000039542 | <b>Ncam1</b>   | Neural cell adhesion molecule 1                                                     | NM_010875 | <b>NCAM1</b>   | NM_000615 |
| 1423379_at   | ENSMUSG000000023411 | <b>Nfatc4</b>  | Nuclear factor of activated T-cells, cytoplasmic, calcineurin-dependent 4           | NM_023699 | <b>NFATC4</b>  | NM_004554 |
| 1428661_at   | ENSMUSG000000059323 | <b>Nfkbil2</b> | Nuclear factor of kappa light polypeptide gene enhancer in B-cells inhibitor-like 2 | NM_183091 | <b>NFKBIL2</b> | NM_013432 |
| 1422342_at   | ENSMUSG000000019865 | <b>Nmbr</b>    | Neuromedin B receptor                                                               | NM_008703 | <b>NMBR</b>    | NM_002511 |
| 1437339_s_at | ENSMUSG000000024713 | <b>Pcsk5</b>   | Proprotein convertase subtilisin/kexin type 5                                       |           | <b>PCSK5</b>   | NM_006200 |
| 1426410_at   | ENSMUSG000000035232 | <b>Pdk3</b>    | Pyruvate dehydrogenase kinase, isoenzyme 3                                          | NM_145630 | <b>PDK3</b>    | NM_005391 |
| 1417523_at   | ENSMUSG000000020120 | <b>Plek</b>    | Pleckstrin                                                                          | NM_019549 | <b>PLEK</b>    | NM_002664 |
| 1440564_at   | ENSMUSG000000050558 | <b>Prokr2</b>  | Prokineticin receptor 2                                                             | NM_144944 | <b>PROKR2</b>  | NM_144773 |
| 1424560_at   | ENSMUSG000000032322 | <b>Pstpip1</b> | Proline-serine-threonine phosphatase-interacting protein 1                          | NM_011193 | <b>PSTPIP1</b> | NM_003978 |
| 1438052_at   | ENSMUSG000000026395 | <b>Ptprc</b>   | Protein tyrosine phosphatase, receptor type, C                                      | NM_011210 | <b>PTPRC</b>   | NM_002838 |
| 1423774_a_at | ENSMUSG000000038930 | <b>Rccd1</b>   | RCC1 domain containing 1                                                            | NM_173445 |                |           |
| 1423428_at   | ENSMUSG000000021464 | <b>Ror2</b>    | Receptor tyrosine kinase-like orphan receptor 2                                     | NM_013846 | <b>ROR2</b>    | NM_004560 |
| 1419394_s_at | ENSMUSG000000056054 | <b>S100a8</b>  | S100 calcium binding protein A8 (calgranulin A)                                     | NM_013650 | <b>S100A8</b>  | NM_002964 |
| 1448756_at   | ENSMUSG000000056071 | <b>S100a9</b>  | S100 calcium binding protein A9 (calgranulin B)                                     | NM_009114 | <b>S100A9</b>  | NM_002965 |
| 1450826_a_at | ENSMUSG000000040026 | <b>Saa3</b>    | Serum amyloid A 3                                                                   | NM_011315 |                |           |
| 1437279_x_at | ENSMUSG000000020592 | <b>Sdc1</b>    | Syndecan 1                                                                          | NM_011519 | <b>SDC1</b>    | NM_002997 |
| 1445326_at   | ENSMUSG000000039683 | <b>Sdk1</b>    | Sidekick homolog 1 (chicken)                                                        | NM_177879 | <b>SDK1</b>    | NM_152744 |
| 1418612_at   | ENSMUSG000000078763 | <b>Slfn1</b>   | Schlafen 1                                                                          | NM_011407 |                |           |
| 1450322_s_at | ENSMUSG000000002024 | <b>Slfn4</b>   | Schlafen 4                                                                          | NM_011410 |                |           |
| 1448377_at   | ENSMUSG000000017002 | <b>Slpi</b>    | Secretory leukocyte peptidase inhibitor                                             | NM_011414 | <b>SLPI</b>    | NM_003064 |
| 1447643_x_at | ENSMUSG000000022676 | <b>Snai2</b>   | Snail homolog 2 (Drosophila)                                                        | NM_011415 | <b>SNAI2</b>   | NM_003068 |
| 1419155_a_at | ENSMUSG000000076431 | <b>Sox4</b>    | SRY-box containing gene 4                                                           | NM_009238 | <b>SOX4</b>    | NM_003107 |
| 1449254_at   | ENSMUSG000000029304 | <b>Spp1</b>    | Secreted phosphoprotein 1                                                           | NM_009263 | <b>SPP1</b>    | NM_000582 |
| 1424938_at   | ENSMUSG000000015652 | <b>Steap1</b>  | Six transmembrane epithelial antigen of the prostate 1                              | NM_027399 | <b>STEAP1</b>  | NM_012449 |
| 1451532_s_at | ENSMUSG000000015652 | <b>Steap1</b>  | Six transmembrane epithelial antigen of the prostate 1                              | NM_027399 | <b>STEAP1</b>  | NM_012449 |
| 1450298_at   | ENSMUSG00000005824  | <b>Tnfsf14</b> | Tumor necrosis factor (ligand) superfamily, member 14                               | NM_019418 | <b>TNFSF14</b> | NM_003807 |
| 1442140_at   | ENSMUSG000000026725 | <b>Tnn</b>     | Tenascin N                                                                          | NM_177839 | <b>TNN</b>     | NM_022093 |
| 1421792_s_at | ENSMUSG000000023992 | <b>Trem2</b>   | Triggering receptor expressed on myeloid cells 2                                    | NM_031254 | <b>TREM2</b>   | NM_018965 |
| 1448594_at   | ENSMUSG000000026728 | <b>Wisp1</b>   | WNT1 inducible signaling pathway protein 1                                          | NM_018865 | <b>WISP1</b>   | NM_003882 |
