# Supplementary material
Source: PubMed Central journal article supplement (PMC2835043)
Supplement: mt2009182x2.pdf [file mt2009182x2.pdf]

**Table S2**

[Click here to download Supplemental Table: Table S2.txt](#)

>NM\_172845-Mouse-1mchr1\_P011009chr1+171318326171319026mchr1\_00178  
cgggctgcagactgtaggaaggagagccgggcggaagtcgctcccgcgcgccctggggcttcccttctatcgcca  
caacggagtcctcatctggaagctggcagggaggtcaattgcgaacggaacaacatccggattccgctctcagcttca  
cttgcttttaataacgacgactgccgtcatctttagtaaggcgctccctcccacggcttctctgggctgagagattha  
ctgctctctctgaggcaacttcgcaaatccagcacttcccgtaggtccagcctctgcactcgaactttccttaga  
aactgcgctcccttagtcccctacgactctctgtatggcgcttccctgactatcttaccatcttggtcagtctctg  
cggtagtctgctttccgacagaagcccccaagtttgatgactatctcttactacgaaatccaaaagtgcttctcc  
agaggtccggaacgggcttGTGTGAAGGGACTCAAGTGCAGATGGGCAAGTCACAACAAACGGGAATTCACAGCCA  
AGG  
CCACGAGCGGTGGTGAGCAAGGGGGCACTTGGTGCAAAGATAAGGAAGCAGCAATTTACAAATGGGAGGGG  
AAATGCTC  
TGACAGTGACTCTTCAATCCCTGCGATGCCAAGTCACAGACTCAGGGAGCACCCCTTAGC

>NM\_172845-Mouse-2mchr1\_P011011chr1+171319912171320612mchr1\_00178  
tcccttgtgtgattgactctctgctcagccctctgctcaggaccaggagggtcaggatgtgatgggtcaagag  
gtgagactggaaatcaccagagggtgggtatgcggaagtgataggaccaggacaggtttagtgacgggagcaggaa  
gggagggggaagaggaagcattctgaggaatgatgtgggggacaggagctgaccaggcagagaatgaataaggggaa  
ggggcaggggaggtggggcttctctgggaaaggaaggactgctgagtgtactctctctctgggatttctctgggaa  
acaagtgccatagggtgagtgagcagaattgccccgctctgaatgcttcttctctgcttgagagagtgctt  
tggttcttagtccccccagttctggaagcagaagagtcatttagtccctctctaaacccacacacatacacatact  
ggtcactatccccatcccagGTTCTCTCTCTCTCTCTCTCTCTCTCTCTCTCTCTCTCTCTCTCTCTGAGATGTGTGTGT  
GTGTGTGTGTGTGTGTGTGTCTCTCCCCCTCCCCCATGGGAAATGAGGAGTCAAAGATTACTAGATATTC  
CAGGAAC  
TATTGGATTTGAAAGGTGGGGTCAAGGAAGTAGCAGAGATGACTTCTGGGTGAGAGAGAG

>NM\_172845-Mouse-3mchr1\_P011013chr1+171321274171321974mchr1\_00178  
ccccagtctgacctcccctggggctctgtccccaaaaaaaaaaaaaaaaaaaaaaaaaaaaaagaccggga  
aagagacagctgagggtgatgggtggattgggaaaaaagatgtgtcatcagctggctcagtcctaaatgcatctgc  
ttgtagagattccccctccctgggaagtccttccccccccctctttttaaggaaaaaagaaaaccactaa  
ggtctttgggaagcaatgatacatctccatccttcagagtcccagtgaccaagcttctggctgagtggcttacagatct  
gccactcacacagagggcggttctggatgcttaaaaagagctggaggggagagagctgggagaaacccggggaagacc  
cacagatacacagaaacgagagagacagaagaggagagagacagacaaagagacagcagcaggaggaggaggagg  
aggcaaacagagggcgagcaCTGAGGCAAAGCCAGACAGCTGAGCAGAGGGAGAAGCCAAGGAGTCACAGACAAAG  
ACCT  
GGGACAGAAAGGCAAAGGAGGAAGTTTGGAGCAGAAAGAACCCGTGGGCACCTTTTCCTGAGCCCAGGGGCTG  
TTTTCTT  
TTTCATCTTCTCTGAAAGTCCCTAGCCATTTAAAAACTTTGCCTCAGATTTTGGCACAA

>NM\_172845-Mouse-4mchr1\_P011015chr1+171322849171323549mchr1\_00178  
cctttcttgaataacctggactactcctgctcggctccttgcttgctctgaggattccctgaggtaggtcagattc  
tctggccggaatgacctctccccctctcccccccccctctggccctggagctctctgctgacacagttcccagca  
gtaaagctctccaacagcctgtggcctaggctctttctctccccagtgatttttacccccccccagctacagg  
agtaaaatagaggccggggattgagttttggctctgatgttccgtttaaaattgttctggtaaactcaaacag  
ggcaggaggaggctggcatcccatactctgggtcaatcttcttccacactgtgggctgactgcagggtctgctgaggc  
actatctccccctccccactctggtctcccccttcttccccccaccctctctagctttaaaccagaccagac  
actcctccacaccgcccacGCTGAGATCTGGCTGTGGCCCTAGCTGCTGACTGAATTGTTCCTCCAACACACAGTGC  
A  
GACACGTCGCCGAGCTCAGCTCAGCCTCTAGTCCTACTCCCACAAGCCCCGCCACACTTGGGGACCCTAGCGCCCTC  
CTCCCT  
GAGTCAGTCCAGCTGCTTTTCACCTCTGGGGCCACTTAGCCATGAAACGTGGCAAGCC

>NM\_080435-Mouse-5DBTSS:NM\_080435chr14-4775796547758665mchr14\_00519  
tttgtgttttattctctgtatccaagaattgataactatataccaacaaaaaggaaacccaactcaaggagctgaaaat  
ggccagacagttcacacttgccacatcagagggaccaagagtgaacgggaaatgtcactcctgacctgccccaccccc  
ggccccagctggtaccaggacacccccccactccccgctttctcccaggctttcctggcctccccacttccaaatggt  
gtatccttatctgtcacatccctttgtcgtccccttaccctgctgtttctcccacggccacctgctcatcg  
acatcgtcgtcgtctaaagaaagagagaaggtgatgattagagaatgcaatctgagcatgggaagcagccaggggag  
caggctccagaacgggaaggggctgggctgtatcgcggggaagtgaggggggcctggcgccaagagggaagtgcag  
cgccggcaggccctgagccACTAGCAAAGCAGCGAAGGTGAGTAGTAGCCATCCCACCCAGGTTCCCTCCTGGAGCC  
TA  
GCTTTGCTGAGAGAACTTCTGGAGCTTGACCCAAAGCGGTGAGTCTGCGGCACCTTCTTCTCAGCTCCAGCCAG  
GACACT  
AGCACGGTATGGTTTGTGGGAAGGATAAAGAAGTCCTGTCACAGCTGGGAGCCCTGTGAG

>NM\_080435-Mouse-6mchr14\_P011968chr14-4774758847748288mchr14\_00519  
catcctggtgacattgttcttaccgagaaacccaaatctcacagcaaatgactgagatctaagataagccctcaagcc  
taagccactctttaaagaggaaggtctcgttcaactcagagggcttgagccagaggtgatctgattcagcaatgg  
ccactctgtgaaactctgctccttcaatggttcagacattatcagttctatttactgaaatactgctctagac  
tgtccagttccagaacattatgtctatcttggccccaccagtggtggtctggatactgagacttctccttcct  
agtcctatctcccagtcctgatggcagggcacagcctctcacagcagagctggttctggcgttcaaagcctcctctgt  
cttctctcagggccccagctctgatcatcacctacagcatcaccttcttcttcttctcctctctctctgctgcttc  
tcagagcacctgacggtaaaGGGGTCTGGGGAGAGGGGTAGTGACAAGCTGAAGCCCTGGCCTTGAAGTGGTCTGAA  
GAA  
GAAGCCCTAGCCCCGAGCCATGACACCTCTTCTTCCACAGAAGTGTGTCCAGAAAGGTCCCAAGATGTTGCAC  
TGGCTG  
CCTGCACTGTCTGCTCCTGGTGGCCACACGGCCAGGATTTTCGAGTAGCCCTGGGTACGGCC

>NM\_009655-Mouse-7mchr16\_P009070chr16-5243224552432945mchr16\_00456  
ataaagagatctatcctacaatactgtaaaagcagggagaaacaagacagggaggcgctgggggaaatcacagctgaa  
gacagagttaataattcaagcacgaaaggaaaggattcaaatccgtgtctgtgttctgtgctgctgctgctgctg  
cgtgtgtgtgtgtgtgtgtgtgtgtgtgtgtgtgtgtgtgtgtgtgtgtgtgtgtgtgtgtgtgtgtgtgtgt  
cacttgcaagtagctggtgggtcccaatctttgaagacaaagtcccgtgaggctagttagcattccctgctggagactg  
gcttcacacagggggtgacctgtgatgaccaaaagactatctcatgcccctgagaggtggtcagggaccaggtttaa  
ttatgtgagggcattaagagttgtgatcctgcaatcttgagttagaccacttaccgtcccaacagctccaccctggtg  
ttttagaggaaaatattcctTTATGCTTTCTGCATGAACTGAAAGCGACACGGCTTCCCATGCTACGCCTAGGAGGTG  
G  
TTCAAGCTTTTGAATTTGCCTGAGAAGCCCCGTCCATCTGCTGGATGCCTGGCTTTTCTGGAAAGGACCAGGAG  
GCGTAGG  
TTTTTAATCTGAGTAACTCTGGATTTTGTTTTGTAACTTCAAATCGTCACCTAATTAATA

>NM\_007482-Mouse-8DBTSS:NM\_007482chr10-2469039624691096mchr10\_00391  
caatataaaacaaaaaccagccccatgcttcttagacagtgaacctggtgacacatgaaatgtgtctcactttcccca  
gaacttgaagccttgactcaggatgctcaacagggaggaaagtaagagacacccccccccccctcaccggggggggg  
agttgctgttttagcctcacttgcaagtcaccagtggaactaaatcctggaaaaggtgagcacctgcctgaggtgcc  
caggccggaagcctagcacttcacatgaggttatgaaatcacataattgtcaattgtctgaggagagattaatgtcat  
ccagctggcttttcaaaaggggtgaaactggacggatgaataatgctcagaggggaagaatggtagttcctctgatggg  
aggttctgtgactctgtcattctccattcgggtgggagccagttggtgataaacagatccaacctgattataagg  
ggggaaaagatgtgcctcTGTCTTTTAGGGTTACGGCCGGTGGAGAGGAGCTGGACAGCCCAGCACATGCAGCAG  
CA  
GCAGCCGCTGGAACCCAGAGAGCATGAGCTCCAAGCCAAAGTCCTTAGAGATTATCGGAGCGCCTTTCTCA  
AAAGGAC  
AGGTGAGTTTGGCTTTGAATGACTGGAATTTATTGGGAAGTGTACATTTTAACACTTGC



>NM\_009772-Mouse-13mchr2\_P025879chr2-127580683127581383mchr2\_00045  
gtgccacggcatgcatgtggagatcagaggacaacttgaggaagtggttttcttccaccttgatgctttta  
ttcaccgagccagctcaccagctatgccatttctgtaagcaagaggacaaaaattcgtgagtgactctcaagaccaa  
gaggactcaaaggggttcagtcacagaatcgtcacgttcggcctgtagtgaatactgtaagccagttgccatttata  
ccgttttttaaaaagtaataataataactctatgccaaaacatggctagtgctcactagaatggaaacaaaccttagct  
cagtcagcacctagcatagactcactaaaaggcaaatgaaaagaactcgggctagggacggagggggcggggacggag  
gccccgactttgtctccagcaacggccgagcagcattggccagctctcccagcggagaccaatagtcaggcgctgccc  
cacgttcgacatcacaagtgCGGCTGCGCGGGGAATTCGAATCGCCGGCGGCCTTCGAGACTCGGGGTTAGGGGCTGA  
TG  
GGGAGTTTGGTCGGCGGCTGGTGGGGTATTTGCGCGCTGCGCGTTTTTTCTCGTCATGGACAACCTAGAAAAT  
GTCTTTC  
GGTAAGTGTCGGTCAGGTGCGGTGAGGTGGGCCGGTCGGGACGGTTAGAGTCCGGGTCCC

>NM\_009773-Mouse-14DBTSS:NM\_009773chr2+118379379118380079mchr2\_00302  
taaaagaaaaaacgagaacacagctttccacagaaacagctgggtgagagtgccctaaggatccctggacaggtgtt  
aagacctggggctcagacaagacctaggcgtagcagcttaattgttcggagcaaccagaagagtaagtactcaaga  
cacgttatgaaactgaaacctcaaagaacctcttgaataaaagtgtctctccctgggttcgaaggctgtcttagaaa  
ggaaacacagagcaactcgaagtgcctgagcagcgtcagtgctagggacaaccattggctcttgacctcaaactgaa  
actacaactcccattgtgcattgagcagcgtgcttaaacccgggatacactacaatccccagaatgcttgggaggag  
cgggagcggggagcggcgaggctacgtctgctcaagagacgttaaatgaaactggggcccgtgctgatgggggc  
gtgaggaggctattctgagaAGGAATCGGGTGCCTGGTTTTGTTTAGGAGCACGGGGTGACGATCTTCGCAGCTCCAG  
AG  
CCAGCTGAAGGTTGAGGGAGACTCAGTTAGCACTCGGAGGATAAAGGTCTGCGGAAGGGCGAGAGCAAGTAT  
TGGGAATG  
CAGGATGGCGGAGGCGAGGTAAGGACCGGACGCAAATGCTGCCGCTGGGTGCTCGGCTG

>NM\_009779-Mouse-15DBTSS:NM\_009779chr6-123493537123494237mchr6\_00032  
ctatgggactggagagatggctcggaggttaaaaacagatcccagcaccacattaggtccagttccaagaaatctagc  
atcctttcttgccctctgtgagcaaccatataatggcacacacatactgatataaagataaaataagcaattaaaggg  
aaaaaaataaaacctcactctgtagcacagacaagcctcaaatttctgcctgcctgcatctcagcatctcgtagtaagg  
tgacaggtcctcaggaatatctgtgctgtagcggcctcctccaccgccctcctctgctcttcttcttctatc  
tacgcccgttaagtttaagaggtgactcatgaaaggccctcctgtgagtcagatagcagtcagtcagtcagttccc  
tttaccagggaaaagtcaagtcagcaactcgtccaatgcactcactctcattttggctggaccagacaggattt  
gttggtggctcgagatcatCAGTCCTGGAGCCTTTGGATTCCATCTCAGTGTGCTTGGTAAGAAAACATAGATGAGC  
CT  
TATAGTTCATGCTTGGTTTAGCCTGCTGATTATGTACAATGGCTTCAAGTTCCTTATCTTCTGTTTCCTTCTA  
TTCTTTT  
CCCTAAAACCTTTTTTTTTTTTTTTTTTTTGGAGAGTCTTACATAGAGCCTTGGATGGTTGGGAA

>NM\_016960-Mouse-16AB015137\_1chr1+8364170383642403mchr1\_00414  
gttcattcagagtctgtccctcttttccaacacacacacacacacacacacacacacacacacacacacacacaga  
gagagagagagagagagagagagagagagagagggaggaggaggaggaggagagagagagagagagagagagaga  
gagagagagagagagagagagagagagagagagattaagttaaacctggacaggtgccatttctggccactcgtctgagct  
gcatttctctctacatcctgaggaattaacaggattccctcctcccctgcccctcccccacccccacctgacctcac  
accttcaacagtaggaaaaggcaggaagtttccctgtgggttttcttgtggtgacaggtgaggcagattaatcaa  
tgggggaaaacccgggtgagaacacgccttctgtgtacattcccagttttgctataagaagggtggtgctggagc  
acaggagcactcgagggaCTGGGTACCCAGCACTGAGTACATCAACTCCTGGAGCTGAGAATGGCCTGCGGTGGC  
AAG  
CGTCTGCTCTTCTTGGCTTTGGCATGGTACTGCTGGCTCACCTCTGCAGCCAGGCAGAAGGTAAGGGTGGCGC  
CTTCTG  
CTGGTTACAGGAGACTTCTGTCTCTGGACCATATCTAGGGGTTCCCTGAGGACAGCAGC



>NM\_025866-Mouse-21mchr2\_P006481chr2+7236978772370487mchr2\_01074  
ataaagctctaaagactttacccttcggagaggcttactcaactgaaggctattttaaaccacgccggaatcttt  
cttgaagcaacaggacttaactggtctattgactacatagatagtggtggtgtagataagagggtgatgctct  
cagatatttgggtggtatccccgttcttctttaacatttttaagattaaactacagcgaaagtgtgaacgcagt  
aagaggctctaccagccttaacaatctccgttttgtatgcaaatcagacggccagctcaggacctggcagccacttc  
gcccacttcccaggaccgcgagcttcataaaaagccagtgagctcccaaacgccactgttcatagaacat  
tcagcagtttccgaggacactcaaggtattacaaccacgagaaccgcttctatttttccagagctgggacgcttcgg  
gtaccgctaaagaggtcatcTTAGCTGGCAGGACCTGCGTCCCGCGCGGGAAAGCCGGTGGCCCCGCCCTCCGGCGG  
C  
GGAGTGCAGCCCCGCCTCTGTCCCGGAGCTCGGGTTGTTCGGGCTCTGAGTGCTGGTGTGTTCCGACGAAC  
TCCCCG  
TTCCGAGTGCCTGGGTACCCGCCCAACATGGAGGCTCGCCGCGCGGGTGAGGCCG

>NM\_025866-Mouse-22mchr2\_P006491chr2+7237550772376207mchr2\_01074  
ggctattttctaccgcataggcatttaaacatggttatggaacttagttatccctagaggatctttgaaa  
tagggattattttaagggaatgagaagggggcaggaatttataaaaaatcatttagacatgtagtctcaggacagta  
agggtggctcagacactgtctacaccagtaacagagtattcatttgaagacttgattttgtaccaccaaccttgc  
gactggttaagactgattttgctcatgctttattccaaaaggattttgtggtgacctgtctgacctggcagatt  
ttaataacaccttctctggttaactagagactgcagttgaacagggaggctgcaggaccgaagtcagtgccggcac  
tccgggctctcagggtgcaatgaagtttccggcacgaaataccggaggggcggccagcaaaaaagcagcgcccaaaa  
gccctctgagagctctgcaaACGATTCCCACTCTGACTCTGAAGAAGAAGAAGAAGAAGAAGAAGAAGATGGCA  
TGA  
ACTTTCTGGAGAAGAGAGCCTTAAATATAAAGCAGAACAAAGCAATGGTAGGTATTTGAATGGACCCAAACC  
TTCCCCA  
CTTCTTCTAAGCAGTTCCTTTCTTCTCTCTCTAAGAACTGTTTGTAAGCTGTGGGATT

>NM\_007697-Mouse-23DBTSS:NM\_007697chr6+103889662103890362mchr6\_00602  
aagtcctcgcctcctaaataaagaagcaaaaccggcaagactttaagaaaaaaaaaaaaagtggtacaaggtacc  
acaccctcagccatacagcaaaaggtaaaagagactgggagcctgtgtgtggaatgtggacagaggagggtggaccagg  
gagcagagggggagggttcttttcggttctcagtggaaggcaaccggcagctacctgtctctttgagggttag  
agatgttaaaatgacaagcaagtttctcttctcctcgttttcataaaaccaaagtctcaagcctgtagctgct  
ctgtccaagggagtgtgtgaagagggggaaaagaagcgtgtgggtgagggtggcagagcagatcccggggacag  
cagaaaagggcgcgagctagctcctccggcaggaggcgtggataccggtacaagctcgaacaggtccagcctctgg  
agacctgtccaacagcaggAGGGGGCAGACGGGATCTCTGTGGGCAGATCGGGGTGTGGATCAGCGGGAAGCGCCC  
AAC  
TAGAAACTCCCTTGATTCTCCAAGAGGCGCTGGACCTCGTTGGTCCCCTTTGCCCCAGTGATCCAGCTTTAGG  
AGAAGT  
TTTCCCAAGAGAAGGTACCAGACAGATCGGATGTCAAGAGGCGGCTCAGGTGAGTCTATT

>NM\_025415-Mouse-24DBTSS:NM\_025415chr13+5067158150672281mchr13\_00382  
cacccttcaacttctttacatgagcacatcttttaagatgggactagctcgcagccaagcgttaattagcgttgcca  
tcaggggcagcggaggacacctaccctctggaacgctccgagctggacttccctgaccacagagaccgccccaggc  
gtctcgtgccgtccgccccagagccccggatacctcatctcgtgtccgcccaccaccaacggttctgccccaggc  
acgttctaaccactgcgcagcgcgtgcgaggcacttaacgactcggctccgccccttcaatatcttggggtcgcg  
ggcgtcctcgtgaatcgttagccaatccttactccgcccctcgaatcttcaaacaggcttctgattggtacctgtc  
ctcaggtctcgcggagcgtgattggtggtgcttcccaatcggcggagggtgtcggattcaatccagagcgtt  
gggcctcgggtcgttggtcctATTTCGAGTCGTTGCGTCCGCCCTAGGCGGACGTAGAGCCCCCTTGGCCCCGGTTTCCTG  
A  
TCCCGCTTACTCTCTGCGCGCCGGCAGGATGGCCCACAAGCAGATCTACTACTCAGACAAGTACTTCGATGAG  
CACTAC  
GAGTACCGGTGAGGAGCGCCTGCGGAGGAGGGCCGCGCTGGGAGGTGAGACCTGGTGGTC

>NM\_009899-Mouse-25mchr3\_P90113chr3-145327359145328059mchr3\_00671  
tgcaaatattctggacttgatttggctgtccagtgcttagactcaagcagggtcgcctgaaaggagggtgaaat  
aaaaaggcagggggcgaggagatgggaggtgaaagaacatggagccaaggctcatgttaatatagcacag  
catatataaggggtaaacctcaaaaccaacccagaatagcaatgcaggtagcaacagcacagccaatctgataa  
gtttcatttctgtccgttcatgaattccactacaccaaagtcatagctgcagctaaggcagctgtttctgttcaggc  
cgataaggcctatcatacaaaagtatgtatctctgcctatcatggcaaatagccaaggcttctgggaagaatgttcaag  
gactcctgtccaggacaggctggggggcgaggatcacattttcaaattcccagcgaggcacacacataaataccc  
ttctgtgctgctccttctcaCTGGAGCAGTGCGAACATGGTGCCAGGGCTGCAGGTCCTTCTGTTCCCTCACCTGCATCT  
CCTGCAGAACACAGAGAGCTCCATGGTGCATCTCAACAGCAATGGATACGAGGGTGTGGTCATTGCCATTAAC  
CCCAGTG  
TGCCGGAGGACGAAAGGCTCATCCCAAGCATAAAGGTAAGAAGGGTTTTATTGTCAGGT

>NM\_009924-Mouse-26DBTSS:NM\_009924chr4+134352946134353646mchr4\_00927  
aggcagggtctctattgtagccctgaatgtcctagaatttgcctatgtagaccaagctggcctgaactgcctctgcctc  
ccgagtgtggaactaaaggtgtgtcatcatgcccagcttctgaactgtttgtcacagtacagaatggagcaga  
accaggagccagcagcgttcattcatgtcatctgccaacacctgcagcatttgcattctcaaagctctgggcgagaggga  
ggaggcatgaggcacacacatagcctggcacatgtcacagacaaaaggatgtaaacttacagaggtcaagtgaattgca  
ggacagcatacaccggggccagattagaaccaagtcttggagttaaggctatgcctatgccctcccctggccaga  
gttcttaggaagagaaattcaaccgcagggaagaacactgtggcactgaggaccagagggaagtggtaaccggtag  
ggaaggccagatctcctctcACTCACTTATCTGCACCAGACCTCCTCTCATTCACTCATCTGCGAAAGTGTGAGAGCAA  
G  
AAACCCAGGCTGGAGCTGCAGCTCTTGGGACCTACGTGGGGTCCCTGCTGGGTCTCCAGATCTGGATACAG  
AATAGCC  
AGGACAAGGCTCCACAAGACCCTGGGGCCAGCGGCTGACAAATGACAGTGAGTGAACT

>NM\_016856-Mouse-27DBTSS:NM\_016856chr12+9665518696655886mchr12\_00008  
gagagccaggccatcagatcgtcccagagcagctttgtaaaaggcgtggggcgggcagcgcgaggggtcaccgaagg  
cgacctgtttcccctcctatcgagcgttcccagaacctcccggcgcacaccacgggtggcgggggtcccc  
agaccacctcagcctggtgacaaggcgaaccaaggacagccgcagggagctaggccactggcggcggaagccgtga  
cctaaggagctgccactcggcgcagcctgatgagaggggggtggcgtcggcaaacggcgcttctctccttctc  
acgcgcgaatcccgtacatctaagctgtgaatgatcgcgacacgtttgaataagactggatccaggctgacaaggtt  
tgcgagctttgcgctgtccttctcctgaccgggtcgtcaccacctacagatgggtcgcggggtcgtccccgc  
tcagccgctctgctcagggccCAAGATGGCGGCCACCACAGGGGCTCCTGCCGGCTGCTCTCCGCCGTGAGCGCGG  
C  
TAGCTCTGCTCGCTCTCCGACCTGCGTTCCACTAGGGTTGGGAAGGGCGCGGACGGTGCCGGGGGAGATT  
GGCCTGG  
CAGGTGAGGACGGGAGACGGAAGGAGCCTTCGGGTTGGGAGGAGCCCTCAAGGGGATG

>NM\_016856-Mouse-28mchr12\_P006085chr12+9665569296656392mchr12\_00008  
ggcggccaccacaggggtcctcggctgtctcgcgctgagcgcgctagctctgctcgtctccgacctgctg  
ttcactaggggttgggaagggcgggacgggtcggggggagattggcctggcaggtgaggacgggagacggaaagga  
gccttcgggttgggaggagccctcaagggtgggtcccgcgtgcccgggtgctgcccggacgcctcccgggtt  
cggttgtgacagtctcctggttctggaacaagcgttccgcaagggggaagagaagtactttcccgggctgaaacc  
tcggggtgtggggcgctcctatgcttctccttgcctcctcctgtctagttcctctgagcttcatcagctggagct  
aaaagttaatccgctccagcctgggtccttcccctgtaccgctactcccagcctcccctctctgcttccc  
atcttgggctcagagaacacGAGCCAGCAGGTGCCTTCGTAGCTCCTTAATTCCAAAGACCCTTGAGAGGCTCATGC  
CA  
CGCCTTGATAGAATTAACCTTCTCTCGGCGCTACCACAATCACCACGTTTCCCAAGATCCCATTCTAGTTTCTT  
TGCTTA  
CGTACTTTTCAGGAAACCAGAAGTCAGGCCATATCCAGCCCAGTACTCTGGCCCCTGTG

>NM\_008176-Mouse-29DBTSS:NM\_008176chr5+8970566589706365mchr5\_00153

tgctccctgatacaaacaccaactgtgatttaccacaaaaacagttggcaaaagcaaaccacctcacgtgggataaga  
gagggtagatgtcttttaagaatcggttaatctgccacactcaaaaaacaagacaagcttccatccccgaaatcact  
gtagtacaccaagtggaatcctaggtggcggtggcgccacgtgcacataacgcgtgtgaccacctgcacctgagcactg  
gagactctgaagtctcactactcctcccccccccaacccccagccgtcactgtccagcgaagcacgtcactcctccc  
ctttgggactttggggcaaaaagcaaaaatcccagagtctaactccttgggagtgagcaagggggaggagcgatgtcctt  
tccggttcagggaaacacccctgtactccgggaatttcctggcccggagctctggagtttcgagcataaaaggggctcg  
cgggagccctagagctccacAACAGGACTCAGAGCCTCTAACCAGTTCCAGCACTCCAGACTCCAGCCACTCCAAC  
AC  
AGCACCATGATCCCAGCCACCCGCTCGCTTCTGTGTCAGCGCTGCTGCTGCTGGCCACCAGCCGCTGGCCAC  
AGGTAG  
GTCTCGCCACTGCCACTGGGGGAGGAGGGACCTCTGGTGAGCGCAGCCTCCCACAGTCCC

>NM\_019568-Mouse-30mchr13\_P011675chr13-5539324355393943mchr13\_00659  
catggtcatagctgcctactgagctctacctggccctacagattcttatgaatgtatatgacaagtaccccggttcttc  
acagcccctagatagtcacatgaacatcatactatagaccctcctaggagttgcttagcctcaccactgtcacc  
cccagctctgcaagcagtgactgatcaagacttaacctgtgatgagcccctaatacccactggccttgagcttgacc  
acgagcccagcaagcacaatagagccaacaccgcagggggcgggcctgctggcattctcactggcactgcttgaaa  
ctctaggatttgagccaagcctgggtctctcggtggcttcggacagtaaacctgtgtgtctgagaagtgtccacaggaa  
acagaaaagcagcacccttcagcagggcgtgctccgcctgaccttctccaaggcactgaggtatgggtgtgcaagcgt  
aaagggggcggtgtgtggaGCGAGAGGGTAGCGGATGTGAGTGTGTCCGTGTGTGCGCGCGTGGCTCCGAGTGTGCG  
CC  
GCTGGGATCGCGATGGGTCCGGGGCGGGCGGCAGGGCGGTCTGGGAGATCTCCTCCCCCACCACATTGAGAA  
ATCTCAG  
TGAGTCACCGAGTGGTTCTGCATATTAATGAGCTCGCTCTCCGAGAGGGCAGGAGCGAAT

>NM\_009140-Mouse-31DBTSS:NM\_009140chr5+8971829289718992mchr5\_00063  
ggaacaatgcactcttgtgtacagcctgagatgactaaattcaacggtgtacttacgcagacgtaataatcttcatc  
tagtactatctatgagatgtaactaatagagaagcaatccccatccccgcgcttcacgttgaacacacacacc  
ttaatttctcagtcctaataactaaagtccccaaactgttaggtctcactgatgacatagctcagtaaccactgtcc  
tctagcaggtggctcactcagcagacatcactcctccttttgaggattggggaaaggacatcccagggtcccatag  
tggaagggcagggcagtagaatgagggcagcagctcacgcgcgctgtcccaaccactcagcttagggggcgggctct  
gtgcttctgatgaggggacctgagctcaggaatttcctgggtccccgggctttccagacatcgtgcataaaaggag  
ctctcgggacctcagagcccCAGACTGCGCCTCAGTGCCTCCAACAAGCTTCTCGGGCACTCCAGACTCCAGCCACAC  
T  
TCAGCCTAGCGCCATGGCCCTCCCACCTGCCGGCTCCTCAGTGTGCTGCACTGGTCTGCTGCTGCTGCTGGCCA  
CCAACC  
ACCAGGCTACAGGTGGGATTCGGATTCGAGGCTGATGTTTCTGGGGAAGCCTCAGGTGGG

>NM\_183031-Mouse-32mchr14\_P90083chr14-114300731114301431mchr14\_00470  
catcttgacacagctgttcaggtcagactctacactacactcctgataaccaccagcctccaggcagacagcactatt  
aacttgacattttccttaacctaaactttatgtaaaatatcaacataaggtcaccagtaactatacctatctctctcc  
ctctcctctttctgttaagcttattgcttaaaaaaaaaaaaaaaaaaactttaagactaaatccttattgaaaaaa  
attaaaaagttccatagatatgagcatttcacaaagtcgaaggggcttttgaaacagtttttaaaaatcagtatcagaaaa  
aaaatctcacttcccattgaaaaaaagcagctagcatatgtgaggttaactgatcacggctatgctcagtcac  
aggatgacagggaaaaaggcaccaccataaaaggcgcctgctcagcactctaaagcaacatgccagcttagctaac  
ccattctgagcaaacacggaCTGCCACAACGGAGGTCCTAGCCACCTTCTGATATGTAAGTACCTGACATGATTCTCT  
TT  
AAGTTAAGGAATACTTTAAAAACCTAAGTTTCAAAGTAAATAATGTACTAGATACCAGCTGTAATAACTGT  
CTGTTTAG  
ATTTCTTGGGGTCACTGGCAGCTCAATGTAGCTCCCGAGATGGAAGCAATGAATGAAAC

>NM\_015821-Mouse-33DBTSS:NM\_015821chr8+104577458104578158mchr8\_00842



tgcgcagtaagcgacctggccttaggaaggttcccagctgcccactaccccaccttcaaactgggggttcgcgcacgact  
gggctcagacaggaagagggttctcagaaccgttcccggccagccctgcagccatatcccctcctcgcagggccctgac  
accaccagaaacccttagttgggacaaaaaacagagaaggtggaggtccgaagtcctctgacctcccacaaaacag  
tccgaccggcgtgccaactaaggccagcaatcgcgtgtcaccaccgcgcggtgctcgcctcgggaagccagatctc  
tcgctttgctggggtgcaccgagggagcccacccacctcgcactaacctggcggccgacactcgcctggctctgct  
gcgcgcggttccgggtgtgcgcgagacgagggcggtgcccctagcagagtcgcccgggtccgcccgcgctcccgcct  
tctccgccagggcctctcTTCCTGCCCTAGCTGTCTCCGTGGCCAGTCCCCTGTCTCCGGGTAAAGCCCACCTAGTC  
CGCTGAGCAGGTAAGATAACGGACACCCAAGTTTAGATGGCAGGACGAACTGCCACTGGACATAGCAGTTTG  
GGGTTT  
TGAAGCCGAAAGGGCTTCAGAGTGAGAGCCGCAAATTTAAGTTAGTTCCTGGGGTTCAA

>NM\_015821-Mouse-34mchr8\_P008199chr8+104572831104573531mchr8\_00842  
gtcacagtcagtttgagagctcatcctccagctccgcgagttcctcgtccctgagccggctgggctgcacgaagggt  
gcacagtcagtcggcttggggccggaatccccgccatccatcctaactacggacggcagcaccttctgggtaaga  
tgaattcaaacagcgtcttcatcagtcagccaactgtccagctgctccgacctgcacgcaactccagctgcaaccgc  
agcgttctgggcaagcgcggggccatgcacctctgcagcgcgggtgcgagcgcctcgcggtaggctggaggaa  
gcgccgcacagcagcgcggccagaaccgcaactggacgatgagctgagggctgctgagtgatcttgatctgca  
gtacgtcagagctgtcccactctctgagggtgagcagtcaggccacacgttgtccccaacagactttttcaa  
gcagccagaggagaagctaAGCCATAGTCGGCCTACTCTCCCAACCCCAACGTGAGCCTCTAGTGCTCTTGCCA  
AG  
AAGGGAAACAGAAAGGGTAGGTACTGGGGCAAGGAATGCTGCTGCGGTGAGAGAGGAAGAGAAAACGGAAAA  
GTGCAATT  
AGAGGCAAAGAGAACAGGCTGCTCAGAAGTAAAGGCGGCTCTAAAGCAAGGTGGTATTAG

>NM\_015821-Mouse-35mchr8\_P008209chr8+104581421104582121mchr8\_00842  
agcccaaggctccgaggctcgcttggagtcgagggagagaaaccgcttttgatgcgggccaggacatcctgggag  
ctgtgcacgagctcggagctgctcaccaacttcgccacctgcacctgcccactgacctacagctggacgacact  
ctggtgcttaaggctgctgctgggtgtccgagctccgagcttttctggacaacctgactggtgaaacagcgtgca  
gcccacttctgtgctcaaactactggaggctgtcctcactgctgccccttggactgaccttgctagatgtcgcgcg  
ccgctggaattgtagccgctccgcatcgtccctttgacttctggcactgaggtgctgctgccccgaagatgct  
cgtgctcccctctgctgatgaagcctggcgagctgagttgcccatcctgggctggaggtggagctggagctgga  
gcctgtgcttcagatgaggCGGTGACGCGCATCTGCAACCAGCAGTACCAGTGGCTGTGCTGCGTCTCAACCTCTCC  
G  
GTGACACTGTAGGACCCGTGCGCTTCGCAACGCGCCACTACGCTGAAACTTTGCGCGCCCTCGAGGTGCGCGCG  
TCCGCA  
TCCCCGGAGTTGCACACCGCGCTGGAGGAGCTGGCGGCGCGCTGCGCGGGCTTGAGAGAA

>NM\_021891-Mouse-36DBTSS:NM\_021891chr11-1170352311704223mchr11\_00888  
ttagccttctgctaaacctctgatttcgagctcactatttgatagctgctgctgaactggttaaggccggaggcgcg  
cggggcgggagcctctggagtgccggccggaggtacacctcccctcccctcccgggcccgttctgcccctccagg  
ggactcgtgctctcactcctgagcttcttctctcactgctctgcttaggtgcttgcagcacctagctcg  
gcaaaaagaacatattaaggctgagtgaaacgggaagccaagggttgccttagattatgccaccgcggggtaaatc  
tccctcatagagcggggccgaaacccaaattcccgcgtaaggcctgggcggtgacctcaggccttcgagactccgc  
cctcagctgctgagcgcgctcagccgcttactctacagcatgcaacgcccggcagccgtcacttgcgcg  
aggcgcacttcgaaaggcgcGTTTTTCGGTGGCTGCGGTCCCGGCAGGGAGCACAGGTGGGCCCCGGTAGGCTGCTGT  
TC  
GCCGCTAAGCCGGCGGGCGGAGGCTGTGGTTGCCATGCCGGGTGACTTTGGTTTTGTTTTCTTCTGTCCGTTT  
TTGGCC  
TCGGGTTGTGCGAGAGGGTGGCCTTGGAAGCCCGCGGCCAGACGGCGGCTGGGGCTGAG

>NM\_178185-Mouse-37mchr13\_P000844chr13+2119009021190790mchr13\_00624  
cgttcacgaacgagttcatgatgccatggcctggaggagatgccggtgctggggtgacttctcagcacctgtac

acgtacaccgagtagctctccttgcggctgcgcttgccgtcttcttgggccttggtgacggccttctt  
ggagcccttctcggggcgggagcggacttcgacggctcaggcatgatgagactggaaacttgaactctagcacggaag  
cgacttggctctgtctattttaggagcttattcaaatgaggcatgggatcgggcctatgattggtcatgataca  
atggcgacatccgaagtctgtccaattgacgtgcgcccgcaatgcttccattcgtctagaagaaaagaagaagtcag  
ccaatcgcataggccctttttgcgccagagaaaactataaggccaagctcttgcctttgcaagctacggttttca  
gaagctgtctactttctaccATGTCCTGGACGCGCAAGCAGGGTGGCAAGGCTCGCGCAAGGCCAAGACCCGCTCCTC  
C  
CGGGCCGGCCTGCAGTTCCCCGTGGGCCGCGTGCACCGGCTGCTCCGCAAGGGCAACTACTCGGAGCGCGTGGG  
CGCCGG  
CGCCCCGGTCTACCTGGCGGCCGTGCTGGAGTACCTGACGGCCGAGATCCTGGAGCTGGC

>NM\_178185-Mouse-38mchr13\_P014929chr13-2121339821214098mchr13\_00688  
gttcacgaacgagttcatgatgccatggccttggaggagatgccggtgcggggtgacttgcctcagcacctgtaca  
cgtacaccgagtagctctccttgcggctgcgcttgccgtcttcttgggccttggtgacggccttctt  
gagcccttctcggggcgggagcggacttcgacggctcaggcatgatgagactggaactctggaactctagcacggaagc  
gacttggctctgtctattttaggagcttattcaaatgaggcatgggatcgggcctatgattggtcatgataca  
tggcgacatccgaagtctgtccaattgacgtgcgcccgcaatgcttccattcgtctagaagaaaagaagaagtcagc  
caatcgcataggccctttttgcgccagagaaaactataaggccaagctcttgcctttgcaagctacggttttcag  
aagctgtctactttctaccaTGTCCTGGACGCGCAAGCAGGGTGGCAAGGCTCGCGCAAGGCCAAGACCCGCTCCTCC  
C  
GGGCCGGCCTGCAGTTCCCCGTGGGCCGCGTGCACCGGCTGCTCCGCAAGGGCAACTACTCGGAGCGCGTGGGC  
GCCGGC  
GCCCCGGTCTACCTGGCGGCCGTGCTGGAGTACCTGACGGCCGAGATCCTGGAGCTGGCG

>NM\_008348-Mouse-39DBTSS:NM\_008348chr9-4537093545371635mchr9\_00181  
gaagaggcatctgagtgataccaggctcccaaggcgcctattgacacttcaacctgcagatttagggcaagaacaacc  
taaagggcctgggggtgcatggactcccaccaagagtcaggtaggacgttccctcactgttggttagcagagggccc  
tgcatagaggctccaggactttcacacatgtacctgcacgcttctgtcttctcctggccagtcagtaattccaattgc  
tacaacagagaggggaaggggcaaggggaaggggaggggaggggagaggggagacaggctgtccagctcgggtgagagt  
taagagcccagccagaaagcctcagctgtctttcaccttgagacaaatgcccagaactagctagactcgtctcct  
gctgaggtcctgcggaggttccaagctccgtgggctgagggcggagcaacaggctccgcttcaggtgatgtcaag  
ctggcctgtggatccagcgGCAGTCTTCAGTCTCAGGACGCCGCCGCGGAGGCGTAAAGGCCGGCTCCAGTGGAC  
G  
ATGCCGCTGTGCGCCAGGATGTTGTCGCGTTTGCTCCCATTCTCGTCACGATCTCCAGCCTGAGCCTAGAAT  
TCATTG  
CATACGGTAGGCTCCCCAGCGCTCGCTCTGTTGCTTTAAAGTTCACATTGCGGGGAGAAT

>NM\_008348-Mouse-40mchr9\_P020476chr9-4535882645359526mchr9\_00181  
tggatggacctggctttccagcctctcaggctgcagagactttccaagtggagggtctgagtgattccccagctt  
tagcaagatcctgtgaaatctggcctgaaacaccagcttctatgtgtctgccggggcaaacatgaagtgccttt  
gggggaaaattgtaaaatttaatgccagtacaaaccaggagctcagtcaggctgccaggctctgcacctctctat  
gcctctccacagttcctcgtggtacctgggaggtccttgaggcagccacacttctcgtgtattagttttctc  
agtgtgtgacaaaaacaccaggagagacaactgaggagattttactttggctcatggcttgatgaagaagtccatta  
tgggaggggaagcgcaacagctggagcgtgctggcgagctggagcgtgctggcgagctggagcgtgctggcgag  
ctggagcgtgctggcgagCTGGAGCGTGCGTGGCGCAGCTGGAGCGTGCGTGGCGCAGCTGGAGCGTGCGTGGCGC  
AG  
CTGGAGCGTGCGTGGCGCAGCTGGAGCGTGCGTGGCGCAGCTGGAGCGTGCGTGGCGCAGCTGGTCCGCTCGC  
ACCACT  
GTCTTGAAGTAGAGACTTTCTCATCTTTATGCATCCAGGACTCCGGCCCATGGGGTAGC

>NM\_001008700-Mouse-41DBTSS:NM\_010557chr7+113024770113025470mchr7\_00779  
tttgcgtggttctagggatagatcttgcactctcaggttcgggcatctcatcaacccttaagcaagtttctaac

agatccatgcctcagcttctcatctgaaaagggatagttgcgcatgactccctcttgtagtagcagcaaggttcctgc  
ctgaacctagcaggagactcgcctctaattgatgagttgtttgcttctggcacagacgctgagtaaaccattgggaa  
aatgagcaacagcccgaacacaagccaagctggctgtgaggaaaggcaagattcgagtcgagcagctggtgactt  
aaaagctggagctctggacagctgcggacgcgtgggtggggcatcaaataagccagcagcagcagcagcagcagcagc  
ctgcggtgaaaatgagctgggtgaggggcggggcatgtaaataagccgctgcacggggtggggcgtgcatgaaataagg  
gacaccaggcggcgtaggaaGCGGGGCGAGGTCCTTCTCGCAGGAAAGCCCCGCGGCGCGCTGGAGCCTGAACTCGC  
AG  
GTAGGAACGGGCGGTGGGGAAGCCTGGGGACCGGCGAGTGGTGGCTACAGAACCGATCTGGCCTGAAACCAGA  
GCCCCG  
GAACCTGGGGTGGGCATGGGGCTGCTGGGCTCCTCGCTCAGCCAGGGTCGGCTGCCTTCG

>NM\_001008700-Mouse-42mchr7\_P011133chr7+113036695113037395mchr7\_00779  
tgagctgtgaccttctgacagtaaggatttgggcttctggaagtcaggggctccacatgagaacaaattcaaatccc  
agggccacctatacagctgtgcaacctccggcaagtcaactcaactccctgtgctttgtcccttcatctgaaaatgagg  
gaactgactgtacctcatgataaagctgggttaagtgggtgggaaggacagagaggagagatgacagaagaaaacttag  
catggcgtaataagcagctgtagtgagattgccagagggcagaggctcctccgggacatcaggccaccagagtggtctcc  
aagagatgcacaggttccacttggcgatgtcacccctggctcggggctcggttctgtaataaggaccatgaagacc  
actgttctaaacaattgctctgcatcagccacctcttctcctcctcctcctcctcctcctcctcctcctcctccttctt  
ctctctctctctctctCTCTCTCTCTCTCTCTCTTTCTTAGTCTAGAATAGAGTTTATTAAGGGCATGGGGAAG  
GAAGCTAAGAAGGTAGTAGAGGCAGAGAGAGAGAAGAGAGAAGTAGAGGGTAGAGGCAGGCCATGAGCA  
CATGAAGA  
GAGAGGGGAAGGGAATGGGGAGAGGGGAAGGGTGAGGGGACAGAGTGGGAGCAAGAAG

>NM\_001008700-Mouse-43mchr7\_P011136chr7+113048210113048910mchr7\_00779  
cttgggtcatagttttgtgggttggtgagaaatgtgatagttactcggctggtggcaatcaattcccctcctgccc  
cccccccaacacaattgcttctcttctgcccccaaggggggagaagggggcaatcatgggtggtgagtcctc  
attctgcagaagaacaggtaagtgttattaaagatcagaaccacatctataacaccaatcaatacagggtg  
attcgttgggtattctaaaggatgaatagttttaaagtggcaaaacttaacctcagcttacctctgaggcact  
ggaaaaactgtctagacaagctgctgcttcttctgctgaagcacagagtaagaagaagacagacttcccgaaggctgccc  
ccaaccaagtctctcagagtcctggaaaggcaggtggtgctccatggaggtcagcaggaccgtccttggccagagaa  
tgtagtgctagtggtgcGCTGTATGGAGCTGTTTGGAGCCCCAGTACAGAATGTGGAGGAGGAAGAAGATGAGAT  
AG  
TCAAAGAGGACCTGAGCATGTCACCTGAGAACAGCGGAGGCTGCGGCTTCCAGGAGAGCCAGGCAGACATCAT  
GGCTCGG  
CTCACTGAGAACCTGTTTTCCGACTTGTGAGGCTGAGAATGGGGCCCTTGGCCAGTCA

>NM\_145588-Mouse-44mchr7\_P017530chr7-114513300114514000mchr7\_01039  
gctggggcattttgtccaagattctaaacagggctgggaacttcccacagtaagaaaaaaaggggtggtggtg  
ggggagtcaagttcaagaggaacttttgcttctcacaccaggacagccagggtctaaagagattctgtccgctcca  
aaaggcaaaaattgtattcagagctgggaacttgaatataagaatcaatcaagtccttcagaagaaaagctgagaagga  
aaagtgggcaaaagtctgcattagccaattccaacctggcaattcaaaagcctgaaagtgcagggacctcagttactg  
accatttagtgacagactccaggccctatccctgggaatattttgcttcgagaccggaagtgcagccgagcggcgga  
attacggtaaatagaaccgaaacttccggcggcacgtagctgcatggtcgaatctgagaggaggcggggccccgggt  
aattcaaaagagagaagcggGCCGAAGAAGGAAGGCTATGAGCTTAAGGGCTAAGACGTGTCCGACGCGACGGGAG  
ATG  
GCGTCCGCCACCTCAGGTACGCGGGCCGGGAGGAGGGAGCACCCTGCGTGAGACTTACAGAGTAGCAGTGGT  
CCCCGAA  
AATCCAGCCGGCGCGGGCGGAAGGGCGAGGGGACGCTGGCTGGCGGGCGTGAGGTGGG

>NM\_145588-Mouse-45mchr7\_P017534chr7-114504704114505404mchr7\_01039  
gcctttaaagccagcatcatctaggtgagggtatcaataggacatcctaataacaccttttccactacaggttgatg  
ccttctatggcgaagaagcactcagcaggaagtctatgagttcagtagccatcctaaggcacttgcggaaggg

cagaatgccagtgtacttgcctatgggctactgggagcagtgagagagccagacgagaactacatgcatgaggaaaa  
gaactaggaacattgaggggaacttcataccttctctgctcttggccaggaagacacacacaatgctgggcagccca  
gagcaacctggagtgattcctcgggctctcatggacctctgcaactagcaagggaagagagtgtgagggacggccatg  
ggacgttctgttgcctatgctctatttagatctaccaggaaaaggtaagggggcaagtaccaggccatctagagag  
gacatgaagctcctctagTAAAGGTGTAGTGAAGCCTAGACAGGCAGGGTTGGGGTAGCAAGTGAAAGAACCCTAA  
CA  
GTCCAGTAGAGAAAAGGGATCCTAACCCCTGCTTCAGCAGGCACCCTGGTCATGGAGAAATGGGCTCACTGTCA  
CTGCTCA  
AATAGGTATTAGACCTCTTGATCCTGCATCAGGAGACCTCGTGATCCGCGAAGACTGCC

>NM\_175188-Mouse-46mchr8\_P003857chr8+6458613564586835mchr8\_00432  
cctgtagcacaggatcatcacagaacctcagctcccagagaagcaagagaaggatatcagcaacaaaaacgacaagaa  
actttccttacccttacccttaccactaatttagatattgatttaaaagtcaccagaacagaaaatactgtttatc  
taggctctgcctccaccatgtgcatcccactcttccctttctgaagtctactctgtcctgtcctgactccagctaa  
acaggttctgttaggtctaggaataagtaaagactccgttgtctcttctcgtcctgtcttcccatgtgagtgc  
tggattattccagttttgagcatggcagatttccactggatgacatcatgggagcccagtgagtccgctggaggagg  
ggacagagaaggggaggagctcagaggagaaagaggctggggagccgagccagagccaggtgctgcccacgggct  
gcacgttgtgagctgaggaGTGCACCGCCAGCCACTGACAAAGGATGGGAGGATGCCACTGCCCTGGGATGCCGGCT  
GC  
GCGCAGCCTGCCGGCCTGAGCTACTTTACCCTCCCCGGTGAGTGATTGTAAAGACCATTTGATCAGCCTTGGGC  
AGAGTC  
CTCTTTGGCTTGTGGTCCTGGGAGGCTTGTCCGTGCTCCAGAGCACAAAGACCTGGCACAA

>NM\_008566-Mouse-47DBTSS:NM\_008566chr8+7417575074176450mchr8\_00054  
ccctgactagggtactgagaacagagactgggtcttctaaagtacagcaaacgctattgaccaccgatccatctctca  
gtcccaccttttacttgggaaaggggctccctaagtcccaggctggccttgaacttgcgatcctcctgcttagactt  
tacgaggagcggggctgacagacctgcgcactgggctaggttttctcgaaggcctaaggtttaaacgctcacaagct  
cccagcctctccgcatcttctgctggttagctgtagcgcgaagaacttctcgcgcaaacgctccagcctcacaat  
ggagaccggaagagttgactcgtgacgtcacaagacgccacagcaatcatcttgggaaccaggccttggaggcgggga  
ctcaaccggcagagcagctcaatagctatccgcggtcgaacgaaccaataggagcgcagagaccgctgggacaaa  
cgcggaggctggttttcccGCGAAAGTCGGCTTCTCTAGGAGGGCTGAGGTTTCGTGTGGCGCGCCGCTGTGAGGTGA  
G  
GGAATTGCGGGACCCCGTCTAGGGAAGCTCCC GCCCGCCCGGGGTGCTCAGCTCTCTGTCTCCCTTGACCCAGG  
TACAGT  
CATGTCGGGCTTCGACGACCCGGGCATTTTCTACAGCGACAGCTTCGGTGGCGACCCCGG

>NM\_008566-Mouse-48mchr8\_P005249chr8+7418377874184478mchr8\_00054  
acctcctgctctgagctccactcttctcctggatttggatttcaagcccctctgccacttggctccaccctaccttc  
tccattctcagcaactcaagtgaaccatgctgtttgatcaagcaattgtgttggttctactctgtctgcattatga  
gagactttccagtggctcccaaggcactgtgatctggcctgattgtatggaaccttcttctcctctggtatcttgag  
atgtgaaagactgatagctcctgtactcttaacttctgagtaagactgtgtcgtcctcctggtgctgagagctgtt  
gggtgtgtatgttgacagaggtcaggtgttctgatctaggtctaggccagcagtaggctggaggagatccccttg  
ctcatgtatgcacctgttccctcctagggcgaagcttctggtgctgagcccacaggaagaggaggaatttctgctgc  
ctggtgctccctcccaacatATATGAGCTCATCTCCAAGAGCATTTCCCCCTCCATCTTTGGGGGCATGGATATGAAGA  
A  
GGCCATTGCCTGCCTGCTTTTTGGGGTTCCCGGAAGAGGTAAGGGGTCTGGGAGGAAGGTGCTGATGACAAG  
GCTGCTG  
CAGGAGGATATCTGTGTGATGAGGACCAGGTGTGTTCTTCCATGTCTCCAGGTCCCTCA

>NM\_027973-Mouse-49mchr8\_P003053chr8+4568786145688561mchr8\_00114  
tccctttaaataatcttcttcttaccacaagaaaaatgtaaaaaaaaagaatcgtgagatggatccagaag  
ggaccttcccgtttacgaaggacctggaagggaggacaataacgtgctcgttcaacagtgagctgctacagggagct

aaaagcggcatctgcatttagcaatgcgaaggatttgacagtagtccatcaactaacagcccgccggaagcactggagt  
tttggatccgctggcggctggctcgggtccacccacacccacaccagctccgggtcatttaccccacagaggccgggg  
agttaaatttacggaacggagcagagcgggagagacagcctgcagcagctaagccgggttctttggactccgctccg  
ctgttgggtgtttccaggcctggattatcgtgctcgtcccaggagcgtctctggccccggccgaaaaggcggag  
catagcaggactaggctctGATTGGCTGTTCAGAGCAAGACCGGCTAGGCGCGAGTTTGGAGTCCCTGCCTTTGGGA  
AC  
GGTAGGATGGCTGCAAGGAGAAGTTTTGAGATACTCGGGGAAACCGGGGTAAGTGCTGCCGCCCCGAAATCCGC  
CCAGGAT  
GGGCTCAACCCGTCCAGAGACTCGCTGACCCGGCCTCAATTCCCACAGCCCCGAATCCT

>NM\_026835-Mouse-50mchr19\_P011445chr19-1084315810843858mchr19\_00517  
cccttgcgggtgttgggaactctgctggcatggaagcccggggctcagctcagcgggaaggactgtccccagat  
caggcccgggtagctgttccctatgtaccgagctcaagtccgctcgtattggattggggcaggcgtgtgtccac  
tcaccggaggcttagggctcccgtgggagctctgtggtggcccttgccgggttgggcaagactctgctggcaaggtag  
cccggggctcagctcagtcagcggaaggactgtgccccagatcaggcccgggtagctgttccctatgtaccg  
cagtcttaggtcccgcgctattggattggggcaggcgtgtgttccaatcaccagaggctcttagggctcccgtggggagtc  
ccgtgtgggtccttgccgggtgtgggcaagactctgctggcaaggaagcccggggctcagtcaccgggtcagttttacc  
agagctttccgttggagtGCTTCATAGGCTCCAGATACTAACACTGCAGCTATTCTATACTTGCAAGCTGACTTGAC  
A  
ATGTTTTTTGCTTCCCCGAGCAGTTTGCCATCTCTGGAATTCTGTCTATTGTCACAGAGAAAAAGATGACTAA  
GCCTTTG  
GTAAGTACAAGAGCTATAACTTACAATAATGGAGATGGAAGTTAGTAAGAACACTTCCA

>NM\_026835-Mouse-51mchr19\_P90141chr19-1085493910855639mchr19\_00517  
tactatatcattgtggccaagatggaatgtgcagaactccactgacactaagtcaggatctgaaggcaatgctatcct  
tcgcagacgcaaaccagctcgaagaagaacacctttgtcagttttcataacaacttggtcactctgtccattggcacc  
caatagacacgtaagataatgcaactgaggatcagatcagaaaattagggctcctgagatgctcagcaggttcagctc  
gccactgaatgtgtattctagatctaggataattagagagacacaaaattcaaaccagtgataaaaatgtcagtgctgc  
atgatgatattttatgggaaggaaaagtaacctacaagtctcccagaactggtccaattagtcatttctggtactgg  
aagtctatgaaaaaggaagttaaaggacattcacatgtccagactgtaagcgccattcctgtgtagtcagcagacaaga  
aggaagggtcgggacagttaGAACTTACAAGAAGGAACCAAGGATCAGACTGAGAAAACCCATAGTTAAAGCTCTT  
GGG  
GTTTCTGAGAGCTCAGCTGGAAGTGACTGGGTGACAAGGCGCACAGGCTCAGGTAGGCAACCCTGAAGAGAAA  
TTCCTTT  
GTACAGCACTCTATTTCTGGGACTGCACTGTAAGAGATTGCTGGTGTCTTATGGAAGCAAT

>NM\_031195-Mouse-52DBTSS:NM\_031195chr8-3870901438709714mchr8\_00565  
gattactaagagcatcacagagagagctgaagtaagcaagagcatcattgtttaccttggttaaatgctgtatactttc  
ctttatgttctgctcactacgtataaagacagtggtgtgtgtggggggggaggatgatacaaaaacaaacatggtatctt  
tctctacactgtaccactgcaagaagacacagtgagaataatgaatgtgtagaagccactcacaacgtattagccagg  
gatggctgatggaatgtcaattttgatcctcctcaaaaatttctgctcctttgaatttaacttctcttttcatt  
tacaatgtcctttaaggaaaggaatgagttatctgacaaatttagattttgctaacttgctcattgaagagaaggctat  
tgaagtacaattcagagaaaggttttaacacacactgtgtcatttctttccttggtgctagatgctgaaatactgt  
gagataaagatttaggtttCAATTGTAAAGAGAGGGAAGTGGATAAATCAGTGCTGTCTTTTACCAGCAATGACA  
AA  
AGAGGTATAGTTTAAATTTATTTCTTATTTAAATTACTTATGTTGACAGTGAGTCTACTCTTGTACAAGTGTTG  
ATGTGTG  
TGTGTGTGTGTGTGTGTGTGTGTGTGTGTGTGTGTGTGTGTGTGTGTGTGTGTGTGTGTGAGAGAG

>NM\_031195-Mouse-53MMU13873\_1chr8-3870901138709711mchr8\_00565  
ttactaagagcatcacagagagagctgaagtaagcaagagcatcattgtttaccttggttaaatgctgtatactttcct  
tatgttctgctcactacgtataaagacagtggtgtgtgtggggggggaggatgatacaaaaacaaacatggtatctttc



gtaccactgcaagaagacacagtgagaaataatgaatgttgtagaagccactcacaacgtattagccaggatggctgat  
ggaatgtcaatttggatctgctccaaaatcttgcctctttgaattttaacttctcttttcathttacaatgtcc  
tttaaggaaagggaatgagttatctgacaaatitagatttgccttctgctcttgaagagaaggctattgaagtaca  
ttcagagaaaggtttcaacacacaactgtgctattccttctggtggtagatgctgaaatactgtgagataaaga  
tttaggttcaattgtaaaGAGAGGGAAGTGGATAAATCAGTGCTGTCTTCTTTACCAGCAATGACAAAAGAGGTATA  
G  
TTTAATTTATTTCTTATTTAAATTACTTATGTTGACAGTGAGTCTACTCTTGTACAAGTGTGTATGTGTGTGT  
GTGTGTG  
TGTGTGTGTGTGTGTGTATGTGTGTGTGTGTGTGTGTGTGTGTGTGTGTGTGTGAGAGAGAGAGAGAGAG

>NM\_031195-Mouse-58MMU13873\_6chr8-3870900338709703mchr8\_00565  
agcatcacagagagctgaagtaagcaagagcatcattgtttaccttggtaaagctgtatacttctttatgttct  
gctctacgtataaaacagctgtgtgtgtgtgtgggggggggagtgatacaaaaacaaacatggatctttctctactg  
taccactgcaagaagacacagtgagaaataatgaatgttgtagaagccactcacaacgtattagccaggatggctgatg  
aatgtcaatttggatctgctccaaaatcttgcctctttgaattttaacttctcttttcathttacaatgtcct  
ttaaaggaaagggaatgagttatctgacaaatitagatttgccttctgctcttgaagagaaggctattgaagtacaat  
tcagagaaaggtttcaacacacaactgtgctattccttctggtggtagatgctgaaatactgtgagataaagat  
tttaggttcaattgtaaaAGAGGGAAGTGGATAAATCAGTGCTGTCTTCTTTACCAGCAATGACAAAAGAGGTATA  
GT  
TTAATTTATTTCTTATTTAAATTACTTATGTTGACAGTGAGTCTACTCTTGTACAAGTGTGTATGTGTGTGTGTG  
TGTGTGT  
GTGTGTGTGTGTGTGTATGTGTGTGTGTGTGTGTGTGTGTGTGTGTGTGTGTGAGAGAGAGAGAGAGAGA

>NM\_031195-Mouse-59mchr8\_P90171chr8-3869904238699742mchr8\_00565  
gtctggaggagtgaactgagcagatgtgtagttggatggagaccggaatcagtgctgtgtatcttctctattg  
tttgcctcatattcttgagactggatcgatcattgtgctactagactcacattagttgctgactgactggtcagagca  
gtgctgggaaatctctgctcttattccaagcatcagactacactgctttagcttctcagggagtcttggcatcc  
agattcaggattcatgcttgagtagcaggcatctcgttggaaatctatctccctggtcccataaatctgatataat  
tttaatttaaataagaagtcagaaagattcatatagtggtctatgatgtgtgtatatttagacatttttgctg  
gctaaaattggatcttaataataatataacttgaacacctgaaaaccaactgagcaattttacatggcattctg  
tattctaatgtgtttgacaGATGACAGAGAATCAGAGGCTCTGCCCTCATGAACAAGAGGATGCTGACTGCAGTTCAG  
A  
ATCCGTGAAATTTGACGCACGTTCAATGACAGCATCCCTTCTCACAGTAAGTGGAAAATGATAGGGTGACAC  
AGGTAGT  
TGTTTTGGGTGGCTTAAGTCAGTAGAGATTTGTCTGTCTGTCTGCCTGTCTCCTCACAGTT

>NM\_023284-Mouse-60DBTSS:NM\_023284chr1-169607088169607788mchr1\_00462  
tgtacaaatatccagtgaggtcaaaattgacctatcaatgcttatcaaacagtaagactgttactactactctggat  
tctctataatgctttgattaattgggaacaacacatcctctattgctgttactctctgagcctaagagaaggggcta  
gaaaccgtctgtcctgctcgctatcaggtacgctgaaggcaagttccagctctgggacaaccggtaaacacatccc  
ggaactcctccccctaacgtgcgcttctggtctgaggaatcgcggtccggtctgaaactataaccctgaagaatg  
attcagctgatctggagcctggctgcgcaactctcaagttcccaccaccgtgggtctctgagccttctcggcat  
ccgctcggaaggaagcgctgtgaggaagggcgccctcaaaaaaagggcggcggttgaaaaatgacaacgggc  
agcggcttcgggtggacgcTCGGTTTTTAACGTTTTTTCCGTGAGCTGCTAGGCTCCAGGTGAGTTTGAGCGGGTG  
AG  
CGTTGGAGGGCCGGGTGCAAGGCCAAGGATCGGGGCATCTGGGTTTACTAACTTGTGTGTTGATTTGACAGGC  
TCATCTA  
TCCCAGGTTGGTCTCGAACCCCTATATTCCTGAGACTAGCCTTTTTTTATTTATTTATTT

>NM\_009104-Mouse-61DBTSS:NM\_009104chr12+1966808719668787mchr12\_00001  
ggtagaaaaggaaccaaggtgatcccttgatgattgtgaagacagcttttagggaaccctagtttgagga  
ccccctaatccacaagccggtgcgattgctcgggaccccaatctttaaagaaccagggtccccgcaccctct

acttgggacatgaagacagtcaaggcgacgtgtcccagagggcagcagcgtcactccacccttggcaccaacctcagcgg  
caacgcccggcgaccctctgcgctcaatccccaggctctcgcaatcctaaccggtccggccccgagcgcc  
cgcgacccggccggcgaggtccttaaaggctttgtgcggaaggcctgcgcgcaactcaaactccccgctggg  
ggcgagcggggtcagcggcgtccaatgggagggcagggccagccccctggagcgcggttgggtggctctttaaagg  
cgggcgctggcagtcggcGGTGCACCGGATTCCAGCTGTTTCGCCTGCTCCTCGCCGTCTCCGCCGTGCCCTCGT  
T  
CGCCATGCTCTCCGTCCGCACCCCGCTCGCCACCATCGCTGACCAGCAGCAGCTGCAGTTGTGCGCCGTGAAGC  
GACTCA  
CCCTGGCTGACAAGGAGAACACGGTGAGGGCGGCCAGGTGCCGGCTGGGTTGGATGTGC

>NM\_009104-Mouse-62DBTSS:NM\_009104chr12+1966808719668787mchr12\_00001  
ggtagaaaaggaacccaaggctcatccgtacccttcatgagttgaagacagcttttaggaaccctagttgagga  
ccccctaatcccacaaggccggtgctgattgctcgggacccgaatctctttaaagaaccagggtccccgcaccctct  
acttgggacatgaagacagtcaaggcgacgtgtcccagagggcagcagcgtcactccacccttggcaccaacctcagcgg  
caacgcccggcgaccctctgcgctcaatccccaggctctcgcaatcctaaccggtccggccccgagcgcc  
cgcgacccggccggcgaggtccttaaaggctttgtgcggaaggcctgcgcgcaactcaaactccccgctggg  
ggcgagcggggtcagcggcgtccaatgggagggcagggccagccccctggagcgcggttgggtggctctttaaagg  
cgggcgctggcagtcggcGGTGCACCGGATTCCAGCTGTTTCGCCTGCTCCTCGCCGTCTCCGCCGTGCCCTCGT  
T  
CGCCATGCTCTCCGTCCGCACCCCGCTCGCCACCATCGCTGACCAGCAGCAGCTGCAGTTGTGCGCCGTGAAGC  
GACTCA  
CCCTGGCTGACAAGGAGAACACGGTGAGGGCGGCCAGGTGCCGGCTGGGTTGGATGTGC

>NM\_001002898-Mouse-63mchr3\_P90216chr3-1552036015521060mchr3\_00864  
tcctaagtttcttggactacatttactgatatcagtaaaggacatccaaggatcattcccagagaaccactggttta  
ttccagcattgggctgatcttacaatattatatgagatagaactttatgtgacactgaaaaagaatatgacacaaatca  
acaacatctagatcttaggtgtttgggaaacattctttgtactggattctaactggtgtgttaccagaagacact  
cgagacaacatggcacaagctcagggtcaaaagaaggagaaaggattatggtatgcatatctgagtcctctaaaaaaca  
atggtaaatctgaactcttccctgaagctgatgcaacactgtttagctatttcaaataagcagtatggttctgttt  
tcacataacattgaagtatctttatgcagaacaagtcaataactcttctctacgtgaagaacctgagatctcat  
gagaactgattctggtcccaACAGGGTCTTAACACCAACCATGCTTCTCCTAGATGCCTGGACCCACATTCTCACTG  
T  
GTCCTGCTGTTGATCCTGCTTCTGGGACTTAAAGGTGAGCATGCCCAACAATAGAATCATCTCCCTGCTTCA  
GAGCTAC  
TCTTACCATTGAAAGTAAAGGATTCCAGTTAATTATCTGAACTGTCACAGGAGAGGTAAG

>NM\_001002898-Mouse-64mchr3\_P90216chr3-1552036015521060mchr3\_00864  
tcctaagtttcttggactacatttactgatatcagtaaaggacatccaaggatcattcccagagaaccactggttta  
ttccagcattgggctgatcttacaatattatatgagatagaactttatgtgacactgaaaaagaatatgacacaaatca  
acaacatctagatcttaggtgtttgggaaacattctttgtactggattctaactggtgtgttaccagaagacact  
cgagacaacatggcacaagctcagggtcaaaagaaggagaaaggattatggtatgcatatctgagtcctctaaaaaaca  
atggtaaatctgaactcttccctgaagctgatgcaacactgtttagctatttcaaataagcagtatggttctgttt  
tcacataacattgaagtatctttatgcagaacaagtcaataactcttctctacgtgaagaacctgagatctcat  
gagaactgattctggtcccaACAGGGTCTTAACACCAACCATGCTTCTCCTAGATGCCTGGACCCACATTCTCACTG  
T  
GTCCTGCTGTTGATCCTGCTTCTGGGACTTAAAGGTGAGCATGCCCAACAATAGAATCATCTCCCTGCTTCA  
GAGCTAC  
TCTTACCATTGAAAGTAAAGGATTCCAGTTAATTATCTGAACTGTCACAGGAGAGGTAAG

>NM\_172294-Mouse-65mchr1\_P000430chr1+1284753312848233mchr1\_00325  
tttagtccaccttggactccagcttcttggatcagccacttctgactgcttcatgaagtcttctgaactacaaa  
attatgctgtatataatttctactggagaagagcaaaaatatcagagagccagggcagggcaggtgacagaggttgg



caaaggactaaacaggctgtcgccgcaaagacttgaattaactctgagaaggaatgaccagaggcggcttgggtaaact  
gagtcttgatcctcaggacataagctaaaagcttccatggcagatattcagctatagccacagatgcgcgagagacga  
gagtcttgagttctcagtcagccagtagcagaatcaaagaggttctgagaaatagtgcccacagagtgatgag  
acatctcgaatgacacccgacctccaacctcagcctctagcctccgtataaaccacagagagagagagagagacag  
agacagagacagagacagAGACAGAGACAGAGACAGAGACAGAGACAGAGACAGAGACAGGCAGACAGACAGACAGAG  
ACAG  
ACAGAGACAGACAGACAGACAGACAGACAGACAGACAGACAGACAGACAGAGAACTGAGTGTGGAG  
TGTGTGAA  
GTTCCCCCAGAGGGGCCCCAGGGACAAGGAAGCTGGGGACCAGAGTGATCTCCAAGAGGC

>NM\_172294-Mouse-66mchr1\_P000439chr1+1294096112941661mchr1\_00325  
tcatgtctaacttctggcctgcagctattacaacaagagaaaggtgtcaaacgacaggagaagctaaagagtcacct  
cacccttcaagtgagtggtctctgtctgtcactggggctggggctggggctgtccctggtgacaggaggactccac  
ataggatggtctgtggtggaaatcggcagagagtaacagacctaagaatggcttggtagtgctggcctctcaagagga  
aagaagcacttgatattaaacaatagcaaaagttggatgtgtgagaggcttagtatctgaacatcaatgacatttaa  
ctatgaggagaacaaaatcactgctgaggctcaggaatgggaaggaagtgaagagctgagaggtgggaaagaac  
gtgacactgctattatgatccgaagctcatagcagtagtgattaggggcataagacagagctcatgaggaccagccctga  
ctaagaagttacggcagttgTAGCTGTGGGAGGAGGGAGCATCCTTCTCTTAGGGCTGGACCACTGGTAAGCGTCC  
AT  
GCTGCAGTACTAGACTCAGTGGGCTATTACAGAGAATAAAAGACATGAGGATGTGCAGAGGGAGATCAGGGT  
GGGAGGTG  
GGGTGCAAAGAGGCATGCAGGGTGGGGGTGGGGTGTGAAGGGGGCATGCAGGGGTGGGGG

>NM\_172294-Mouse-67mchr1\_P90006chr1+1281758912818289mchr1\_00325  
aaggagaccaggaataatgagaacagagcaccgggtccgggttaagaacgatcagtgtttcaaagacttggcctcag  
gaatgctggttttcaaagcccacatcttctcattcagctcctgccacagctactactgtactggatgctcaa  
gcgccagaaccgatgctgaaacctgactcctcccgcctcctcccagccggcagctgcaactcagttgt  
ttcgagggttgcataactctattgggtgctgatggtggtttttttccagtcagttcagcagtgctccgaaatt  
caccctcagtggaactgtgctcctcctcttcttggactgcctttgttctgctggcagagctgggtctatgg  
gggtgtgtgatgataataatcggggttataactgcatcttgaagcacttcgagtcagtcctaatgaatctt  
ggaactggtgtagctgggCAGTTTTATCTGCAAGTTGAAAATCCGAGGCCAGAGAGAGGGCGGCTGG  
GA  
TCAGAGGCCAAGCCTCCCTCCCTGGCTCCTGGAGCCCCGAGAGGTCAGGGCGATAAGGAACAATGACTCTCCC  
ATTCAG  
GAGGAGGAAGGAAGTCCCTGCTGCCACCTAATCTCTGCTCCTCTGCTTCTCCCCTGCTCC

>NM\_009446-Mouse-68mchr6\_P012431chr6-125903636125904336mchr6\_00779  
aaacagctctgggtcccaacgaagacttggcagatggtctctggagaagcagcagctggtggcctcaaagcaggggag  
gctgaacagcttttctgccccagtgggtaaggctgtgtgaggtgaggcgaagaggaaaggcaggacagaggtacg  
gatagtgtagggctgtagggatcctccatgccgatgagcagataacatacagataagcaagcctgagcgcc  
ccactgttccatgtaagttggatgtcggggacgagcagacacactccccccccccattttcagatgctcctcaa  
tgcttgtccccctccagcactccagagcctcccgcgaagccacatccaatcagaaagtccagcactgcaacttgag  
ccacatccaatcattagtggtgtagcctaaggccgcccctaaggcgtctgggccaatgagccccggcctggact  
cacatccgtcctggactgtGAGCGCGCAGACCAGAGGCGGTTGAGGACCAGTGGTGAGGAACGGCCGAGGGCGGCTCT  
G  
AGCGGGTCTCCGGAGTTCAGCATGGTGAGAGCGGCCGGGGTGGTGGGAGCAGTCCCAGGCCGGGGTGGTTGGC  
CTCGGGG  
CCTCTGGGGGGGTCGGCCCCACGGGAGGTTGACCTCCGTCTCCTCTGAGGCTAGGGCTTC

>NM\_013468-Mouse-69DBTSS:NM\_013468chr19-3534272035343420mchr19\_00061  
tggcaccagaccatctcctcccctcgggtgattatcccagaaataggatgtcccaagcaacttcccagcaa  
ctggagtctgataagtcagttatcagaaagataggtgtaagtgtgatgacagtgcttgcattttctgatacgtt

agtcatatgagagctgacaaagaaggaaaaagagcagcgatgtggtgcaatattaacaggcagctgtcccctggctccc  
gatacgtgggatgactcgcattgctgagcgggtggtcactgccaaaggaatgacctctcacatttcttctgattcgc  
atacccgccggccagcttgcattctccctcttggctcccagacactaagtctggaatgaaattcacctgcctctgaa  
ttggccactggtggggcaggggtgacttggctcccaggctggaagattatctacccagccctagctataacgg  
gctggtgtggagggctccaCAGGGCCAGTTCAGGGGTTTCATCCACAAGAGAGAAAAACATAGACTCACGGCTGCCA  
AC  
ATGATGGTACTGAGAGTAGAGGAGCTGGTATGTA AAAACATCTTTTTTTTTTTTTTTTTTTTTTAATCTTGGCTTT  
TATTTGA  
AAATACAGATGGTTTTTCTTCTCAGGAATAATGTGGGGTTGGCGTTAGTACTTCCTAA

>NM\_145996-Mouse-70mchr1\_P001616chr1+3662951336630213mchr1\_00279  
gttcacttctcttgcacggtccatcttggcttctactcagctacatgacatgtagacatgggcattttggca  
ttagcctggaccacagacttctagattggcctctgtaggtaacagtacttctgtaaagttgaaagatggaa  
ccggccaggaccacttcagtaaaagccagaagcactttatatacccccagctcttggcaagctacaaagagcggg  
cagttttctaagactctagtttgcctctagggaaaccaacagacatgacagcagcttattctgatttcttcat  
cagcccctagctgcaaagtgggcgcaactacaactcccagacgtcctcgggtctaagggggcggagtctgctccgct  
agaaaataggattcaccaatgggcccagagcgtggggggggggcgggtccatggcggggtccgccccgggaggagcag  
tcgagcggcggtagtcaGTCGCGCCGAGAGCGCTGGGACAGGACGGCTGTGCGTGTAGAGGGTCTCTGCATAGCG  
AC  
GCGCGCTCTCGCTGGGCCATGGGTAAGCGGCTGGCGGGCGGCGCGGGGTCAGAGGGCTGGGGTCCCAGAGCG  
ATCGTGG  
CTCTCAGGGTAACCCGAATGTCTGCGTGCTCTTCTCTCGTGAAAGTCGGGGCGGCCAGG

>NM\_011333-Mouse-71DBTSS:NM\_011333chr11+8164841081649110mchr11\_01192  
accaccaagtgagagaatgctgtattcaacaaggcctgataccaaggactcagccgacttactgggggtcctttcca  
gctgcaaggttctttagccaggggcaagctaggtgtgtttccaagcatcttctcctaaggacttaggttcttggc  
cacttcttttattttagtgaagcagagccactccattcacacttgggtcacagtagtacaattactgccaattctt  
ccttttccccccccccccctactcctcgcagcttatttctcccaggagtggctagaaaaataccaaattcca  
cccacagtttcttcttccacttctgaaacaccgagggctctgcacttactcagcggattcaactccactttccat  
cacttatccaggtgatgctactccttggcaccacacactcctgactccacccccctggctacaataaaaggctgc  
ctcagagcagccagaagtgAGAGAGCCAGACGGGAGGAAGGCCAGCCAGCACCAGCACCAGCCA ACTCTCACTGAA  
GC  
CAGCTCTCTTCTCCTCCACCACCATGCAGGTCCCTGTCATGCTTCTGGGCCTGCTGTTACAGTTGCCGGCTGG  
AGCATC  
CACGTGTTGGCTCAGCCAGGTGAGACCCCCCAGCTCCCTTCCCAGCATATCACCCATT

>NM\_011333-Mouse-72mchr11\_P009672chr11+8164368581644385mchr11\_01192  
aaggtcaagggatttctcaagggcacacagctgggcagaggcagagacaggcctgtggctgtggtggtgtaacataac  
tgaaggttctttagctcctcagcttactcctgtcttcttctcccccttctccatgctccttcttgaac  
ctgcccagactcgccatcacagctcctactgatatactccagatttagcctgcagtttcaaatacagaccatcaac  
catctcaaagaagagaagagatcgtaggaaaaatgtgtagcttgggttgcgatagcctggggtaattatattg  
atgttaaactgttctcctgtgaggggtatgaacaaggaatgagtcagcactcaggtgatttctgtaaactgctcc  
caccttaattgtcaataaaggagagctgatgattgggcagataaaagagaaggtggagcaggaggtgaggagagaag  
aaggagaaaatggaagaaggAGAGAATGCAGAGGAGGAGGAAGAAGGAGAAA ACTGGAGCAGAAGCTCATGGCCTG  
GAGA  
AACTGCAAGTTCTAAGGGGTCTCATGAGCTGTGGGAGATGGTAGTGTAGCGATAGATCTACCCAATCTAGGCA  
CACAGCA  
TGTAATCATATTA ACTGTGTTGTTTTATTGCTGGGGCTTATTTGGGTTGGAGAGATTTA

>NM\_013654-Mouse-73DBTSS:NM\_013654chr11+8165854481659244mchr11\_01335  
gctgttttgttttagtaataaaaaattatattagacacagggttggaatgtttatgattttgttctgttgc  
aaacatcttctctgtggttgaagtagcaggactttcatctcaagtcattttaaattcagcaaat



ctctttctcctataaaaacattgtgaatttcagttttctttcccatcaagacatgctcaagtgtgagtcacttttaag  
aaaaaaagaagagtgctcatgcttcttagggctagcctcaaggatgacttaagcacactttccccttctagttgtgat  
tctttcgatgctaaacgacgtcacattgtgcaatcttaataaggttccaatcagccccaccactctggccccacccc  
accctcaacaaagattttatcaaatgtgggattttcccatgagctcctcaaaattagagagttgactcctaaataatg  
agactgggatgtctgtagcTCATTCTGCTCTGGAGCCCACCAAGAACGATAGTCAATTCCAGAAACCGCTATGAAGT  
TC  
CTCTCTGCAAGTAAGTGAAGGCAGTTCCTTGCCCTCTGGCGGAGCTATTGAGACTGTGAGAGAGGAGTGTGAG  
GCAGAGA  
GCCAGCATTGTGGGTTGGCCAGCAGCCATCAGCTAGCAGCAGGCGCCCAACTGTGCTATC

>NM\_031168-Mouse-78MM3IL6\_1chr5+2841252128413221mchr5\_00015  
tcaggtcagaacatctgtagatccttacagacatacaaaaagaatcctagccttattcatgtgtgtgtgtgtgtgtg  
tgtgtgtgtgtgtgtgtgtgtgtgtgtgtgtgtgtgtgtgtgtgtgtgtgtgtgtgtgtgtgtgtgtgtgtgt  
tagcttctctttcctataaaaacattgtgaatttcagttttctttcccatcaagacatgctcaagtgtgagtcact  
ttaaagaaaaaaagaagagtgctcatgcttcttagggctagcctcaaggatgacttaagcacactttccccttctagt  
tgtgattcttcgatgctaaacgacgtcacattgtgcaatcttaataaggttccaatcagccccaccactctggcccc  
acccccacctcaacaaagattttatcaaatgtgggattttcccatgagctcctcaaaattagagagttgactcctaa  
aatatgagactgggatgtcTGTAGCTCATTCTGCTCTGGAGCCCACCAAGAACGATAGTCAATTCCAGAAACCGCTA  
TG  
AAGTTCCTCTCTGCAAGTAAGTGAAGGCAGTTCCTTGCCCTCTGGCGGAGCTATTGAGACTGTGAGAGAGGAG  
TGTGAGG  
CAGAGAGCCAGCATTGTGGGTTGGCCAGCAGCCATCAGCTAGCAGCAGGCGCCCAACTGT

>NM\_031168-Mouse-79MM5IL6\_1chr5+2841248328413183mchr5\_00015  
ggagagggagtggtgtctttgatgatctgaaaaactcaggtcagaacatctgtagatccttacagacatacaaaaaga  
atcctagccttattcatgtgtgtgtgtgtgtgtgtgtgtgtgtgtgtgtgtgtgtgtgtgtgtgtgtgtgtgtgt  
gtcatgctgctgctgctgctgctgctgctgctgctgctgctgctgctgctgctgctgctgctgctgctgctgctg  
tctttccatcaagacatgctcaagtgtgagtcactttaaagaaaaaaagaagagtgctcatgcttcttagggctag  
cctcaaggatgacttaagcacactttccccttctagttgtgattctttcgatgctaaacgacgtcacattgtgcaatc  
taataaggtttccaatcagccccaccactctggccccacccccacctcaacaaagattttatcaaatgtgggatt  
tccatgagctcctcaaaattaGAGAGTTGACTCCTAATAAATATGAGACTGGGGATGTCTGTAGCTCATTCTGCTCTGG  
AG  
CCCACCAAGAACGATAGTCAATTCCAGAAACCGCTATGAAGTTCCTCTCTGCAAGTAAGTGAAGGCAGTTCCT  
TGCCCTC  
TGGCGGAGCTATTGAGACTGTGAGAGAGGAGTGTGAGGCAGAGAGCCAGCATTGTGGGTT

>NM\_031168-Mouse-80MUSIL6A\_1chr5+2841252928413229mchr5\_00015  
gaacatctgtagatccttacagacatacaaaaagaatcctagccttattcatgtgtgtgtgtgtgtgtgtgtgtgt  
tgtgtgtgtgtgtgtgtgtgtgtgtgtgtgtgtgtgtgtgtgtgtgtgtgtgtgtgtgtgtgtgtgtgtgtgt  
ctttctcctataaaaacattgtgaatttcagttttctttcccatcaagacatgctcaagtgtgagtcactttaaagaa  
aaaaaagaagagtgctcatgcttcttagggctagcctcaaggatgacttaagcacactttccccttctagttgtgattc  
tttcgatgctaaacgacgtcacattgtgcaatcttaataaggttccaatcagccccaccactctggccccacccccac  
cctcaacaaagattttatcaaatgtgggattttcccatgagctcctcaaaattagagagttgactcctaaataatgag  
actgggatgtctgtagctcATTCTGCTCTGGAGCCCACCAAGAACGATAGTCAATTCCAGAAACCGCTATGAAGTTC  
T  
CTCTGCAAGTAAGTGAAGGCAGTTCCTTGCCCTCTGGCGGAGCTATTGAGACTGTGAGAGAGGAGTGTGAGGC  
AGAGAGC  
CAGCATTGTGGGTTGGCCAGCAGCCATCAGCTAGCAGCAGGCGCCCAACTGTGCTATCTG

>NM\_008418-Mouse-81mchr3\_P006964chr3+107415102107415802mchr3\_00200  
ttgccctgattctgcccactgagctaacattataaaaatgaggtctccagatgccttaaggacctcttttaga  
ctgctgggaagacttgagacccatgttaccattaaccattgcttctgtcctcaaaaatcgtttactgaccaaac

ccaggtttagcattattctaccctctaaatccggatgctggccccagactatcctatctgcactagcccagacaacc  
tagctgcagcccctctcccaagacattcagggtctggatgctctctttgctgggactttttgttaccta  
ctctagtggaaacttcccttcttgcaaaagtgtcaagggccaggaggctcccttcgaggatgaggtgtggtccttgcg  
tgggtataacagccctgagattaggtctcgaccacgcgcggaaggaacgcgctgaccaggagcagcaagcagagc  
ccaggaacgaggtcaggcggCGGGTTCCTCCAAGGCCAGCGTGGCTGGGTAGGGTTCCGCGGAGTCTGGGGAGTG  
GGG  
TGCAAGTTGGCGGCGATCCAGTGACAAAGAAGGTCGAGGAACAAGGGTGGCAAGCGGGAAGCGGAGCGCGCGC  
GCGCGGT  
GGGCGGGAACCCGGGGCGGTGGCAGAGAGGCGGGCGCGCCCCGCGGGAGGGGTGC

>NM\_008418-Mouse-82mchr3\_P006966chr3+107415610107416310mchr3\_00200  
ctccaaggccagctggctgggtaggggtccgcggagcttggggagtggggtgcaagttggcggcgtccagtgacaaa  
gaaggtcaggaacaaggggtggcaagcgggaagcggagcgcgcgctggggcgggaaaccggggcggtggcaga  
gaggcgggcgcgccccgcggggaggggtgcggaggagggaggaggagcgtctggaccgtgcagccccgcggccgcg  
ccagcccagacagagcctcggcagccgcagcaacagcggcggggccgggctcgtaggcagagggcggtggggcg  
gggagctccaggaggagcactcggccggcagccgcagcaggaaggaagcaccgccctcccgcctcagaccgc  
gcagccctccaccatcacccgcccaccctgcaccgaccccgaggaggcggcgcgcatcctgcagagccccggcc  
acgccgagctgccccagacATGACCGTGGTGCCTGGGACCACTGCTGGAGCCAGAGGCGGCGGGAGGCGGTGGCG  
GG  
GACCCGCTCAGGGAGGCTGTGGCAGTGGCGGCGCGGTGGCGGCTGCGACCGCTACGAGCCACTGCCACCCGC  
GCTGCC  
CGCCGCGGGCAGCAAGATTGCTGCGGCGAGCGTGTGGTCATCAACATCTCTGGGCTGCG

>NM\_011198-Mouse-83DBTSS:NM\_011198chr1+150030252150030952mchr1\_00867  
catttcataaaaatagaagaaattaataaccgtagctgtgtgctgctctgagcagcagcagcagcagcagcagcagc  
ccagtggggagaggtgaggggattcccttagttaggacctagatcccgggaggggaagctgtgacactcttgagcttt  
aggccccactggatgctgactgggaggaaccggagaccccaaagagcgcagactaggcgcagactcagcgaaccac  
agggcgctggaggatggagagggcggtgcagctctctggcaccactggggcagcaagggcagctcccggcttcc  
ttcgtctctatttgcgtgggtaaaagcctgcccgtcgggtcttgcgcaactcactgaagcagagaggggaaaagttg  
gtgggggtgggaaagcctaagcggaaagacagagtaccactacgtcacgtggagtccgcttacagacttaaaagca  
aggttctccccattagcagcCAGTTGTCAAAGTGCAGGCTAAGAGCTTCAGGAGTCAGTCAGGACTCTGCTCACGAAG  
GA  
ACTCAGCACTGCATCCTGCCAGCTCCACCGCCACCACTACTGCCACCTCCGCTGCCACCTCTGCGATGCTCTTCC  
GAGCT  
GTGCTGCTCTGCGCTGCCCTGGGGCTCAGCCAGGCAGGTGAGTTGCGCCCCGAGGCGCCC

>NM\_011198-Mouse-84MUSTIS101\_2chr1+150030253150030953mchr1\_00867  
atttcataaaaatagaagaaattaataaccgtagctgtgtgctgctctgagcagcagcagcagcagcagcagcagc  
cagtggggagaggtgaggggattcccttagttaggacctagatcccgggaggggaagctgtgacactcttgagcttta  
ggccccactggatgctgactgggaggaaccggagaccccaaagagcgcagactaggcgcagactcagcgaaccaca  
gggcgctggaggatggagagggcggtgcagctctctggcaccactggggcagcaagggcagctcccggcttcc  
tcgtctctatttgcgtgggtaaaagcctgcccgtcgggtcttgcgcaactcactgaagcagagaggggaaaagttg  
tgggggtgggaaagcctaagcggaaagacagagtaccactacgtcacgtggagtccgcttacagacttaaaagcaa  
ggttctccccattagcagcAGTTGTCAAAGTGCAGGCTAAGAGCTTCAGGAGTCAGTCAGGACTCTGCTCACGAAG  
AA  
CTCAGCACTGCATCCTGCCAGCTCCACCGCCACCACTACTGCCACCTCCGCTGCCACCTCTGCGATGCTCTTCCG  
AGCTG  
TGCTGCTCTGCGCTGCCCTGGGGCTCAGCCAGGCAGGTGAGTTGCGCCCCGAGGCGCCCT

>NM\_019662-Mouse-85DBTSS:NM\_019662chr8-103986390103987090mchr8\_00202  
tccatactggaggaacgggctcataggttctgagcgtgtccataatacgtctactgacttgggtaataggccaggat  
gagcagaagggaaaattcatcttaaatgagtggtgtagttcactccactttaccactactggcagcctctgtatcaa

tgcacacacacacacacacacacacacacacacacacacacactggtgcaccctcctcaacgcacactccccatccctcc  
cctccaacacccctctaaactacccccatccccgcgagcctcctccagctacctgcccccccctggcgggtttg  
gtcctagaaggagggtgggggattcccagggcgagtggtatcgctcagcctttgagcagcccgggaggacaggggcggg  
ggcggggggcggggcgggggcggggagcgggggtagggttaaggcggaagtctgactgtagaggtttaaatag  
gaggccctagaacagcgaccCAGCGCCAGCTGAGGGGCTGAGAAAGCAGCAGAGGAGAAAAAGACTGCAGTCGTGAC  
AGC  
GACAAGGGTCTGAGTCTGAACAGGGGTCTACGAGTGGGTTCTATCAGATCCCCAGTGGTCTGTGTGTCGAGCG  
CTGATCA  
AGTCCTGATAACATCTGTGTGAGAGTTGGTGAGTGTCTGACTAAGCGGGGTGGACAACA

>NM\_025429-Mouse-86DBTSS:NM\_025429chr13-3223066332231363mchr13\_00081  
gagctagccttggcacctgaaaggcagagaagacaaggatcacctattgcttgaactggcaatctgggacctatccaa  
aggaccccaaagatatttctccatccctacataccgcacagaaaggattcctttgattttacagcgtttcagtg  
aattcaagaaggtatctttgacctggaagaaaggacatttatttctcttggcatttgcagctgaggaagaaataa  
cttaccagatctctgcttaaagaaataataataataataataataataataataataataataaaaaaggcctgc  
aactgaggaaagtaaagtccccttgagagtggccaatctctgctttttgacagccctcaaggctcgggttta  
aacactcagcaagaaaaggcctccaccagcttgggcttgcaggaagacacgccccttctcatgctataaaggca  
acagctggctctgagcattCATCCTAGCTGTAAGTGGAGCCAGACCTGCTAAGCAAGAGGTAAGATTCTCAGGGGTC  
AT  
AGCAAGGAGGGAGGAAGCTGGCACCTCTTCCAGGAACCAGCACGTTCTGTTACCTCACCTCACCCAAGATG  
TAACCAG  
AAAATGCTCTGTGGATCCCCAACTGCACCCTACTCCAGGCCGCGGGCCCGAGGGAGGAAG

>NM\_025429-Mouse-87AF521697\_1chr13-3223065032231350mchr13\_00081  
cacctgaaaggcagagaagacaaggatcacctattgcttgaactggcaatctgggacctatccaaaggaccccaaaga  
tatttctccatccctacataccgcacagaaaggattcctttgattttacagcgtttcagtggaattcaagaaggt  
atctttgacctggaagaaaggacatttatttctcttggcatttgcagctgaggaagaaataaacttaccagatctc  
tgcttaaagaaataataataataataataataataataataataataataataaaaaaggcctgcaactgaggaaat  
aaagtccccttgagagtggccacaatctctgctttttgacagccctcaaggctcgggttttaaacactcagccaa  
gaaaaggcctccaccagcttgggcttgcaggaagacacgccccttctcatgctataaaggcaacagctggctctg  
agcattcatcctagctgtaAGTGGAGCCAGACCTGCTAAGCAAGAGGTAAGATTCTCAGGGGTCATAGCAAGGAGGG  
AG  
GAAGCTGGCACCTCTTCCAGGAACCAGCACGTTCTGTTACCTCACCTCACCCAAGATGTAACCAGAAAATGC  
TCTGTG  
GATCCCCAACTGCACCCTACTCCAGGCCGCGGGCCCGAGGGAGGAAGGTGATCCTAGTTT

>NM\_018822-Mouse-88mchr11\_P019200chr11-119026443119027143mchr11\_00626  
cacacacacacacacacgtgtcccagccatagctgactcctcattactggtccacacgccccagccctggaaatgac  
actctggacaaaatccactcctccccacccccacgcccctagcgggatcccgggatcgggggtggggatgggg  
ggggggggtgggaaacggaggctgaggtcccagtggggaacacaacaagtctgagaacctggagtaaggcggccggg  
ctctaagtgttgcggtaggagggttcccggagtagggctcaccggaggactcagcgtggccccacagctcctggtga  
ccccagcccacaccgacacactcctcctcctcacaaggaccagattcaccaccggacgctgagactcagggtc  
ttccgaagtggcggtagctgagtcagggaatctcagaaacagagtgggaggacatgggaggcctgcccgtcacgt  
gacctgggggagcggacgagCCGGAACCGCTTACCCTGACCGCGCCGATGCACTGCCCGGACTGGCCTGCTGCA  
CA  
ATTCTGTTGGTCTGCGGACTCTGCGGCGCGCACTCGCGCAACGTGCTACTGATAGTTGGTGAGTGCCGCCGTCC  
CTGGCA  
CGGCCACCTGCTGCTGCTCCCAGAAGCGGCCACTGGGCTCTTCCCCGCCACTGGCCCATG

>NM\_007707-Mouse-89AF117732\_1chr11-117640104117640804mchr11\_00074  
gacctcggagtggcctgggtgcagagggaggagcgtccccgcgggatcaaaagaaagggaagggtgccaggagga  
gcctctcccggctggcctcctagaactgcccgcgctccatcgcgacgccccgcctctgccagaaccagcctctt

agaagggagggggggaaagtgtgaatgagaagttggggcgaggcgcgsggggaggggcccgtgccaggaacgctcgg  
ccaaggtcggcgccgcccgggtcgggcagcctcgcgcccgcgtttgtctccctctcggtagtctcggcgggtcct  
ggaggccccagctccaagcccgcctccgcggcccctccctcgcctccgcgcacagccttcagtgcagagtagtgact  
aaacattacaagaagaccggcggcagttccaggaatcggggggcggggcgtactggccgggtaaatacccgcgcgcg  
ggcctccgagggcgtctaaCTCTGACTCTACACTCGCCTGCTCTTACGACCGCTGTCTCTCCGGGCTCCCGGACGCC  
C  
CTTCCCGGCCAGCTCTCCGTCGAGGTCCCTCGCCAGGTCTTTGCCTGATTGCGCCAGGAGTGCGCCTCATC  
GGCCCC  
GGGAGCAGCGAAGCCAGAGGGGGCGCACGCACGGGGAGCCCCTTTGTAGACTTCACGGCT

>NM\_007707-Mouse-90AF314501\_1chr11-117640105117640805mchr11\_00074  
ggacctcggagtggcctgggtgagagggagggagcgtcccgcgggatcaaaagaaaggaaggggtgccagggg  
agcctctcccggctggcctctagaactcccgcgctccatcgcgacgccccgcctctgccagaaaccagccttct  
tagaagggaggggggaaagtgtgaatgagaagttggggcgaggcgcgsggggaggggcccgtgccaggaacgctc  
gccaaggctggcggcggcgggtcgggcagcctcgcgcccgcgtttgtctccctctcggtagtctcggcgggtcc  
tggagggccccagctccaagcccgcctccgcggcccctccctcgcctccgcgcacagccttcagtgcagagtagtgac  
taaacattacaagaagaccggcggcagttccaggaatcggggggcggggcgtactggccgggtaaatacccgcgcgcg  
cggcctccgagggcgtctaaCTCTGACTCTACACTCGCCTGCTCTTACGACCGCTGTCTCTCCGGGCTCCCGGACGCC  
C  
CCTTCCCGGCCAGCTCTCCGTCGAGGTCCCTCGCCAGGTCTTTGCCTGATTGCGCCAGGAGTGCGCCTCAT  
CGCCCC  
GGGAGCAGCGAAGCCAGAGGGGGCGCACGCACGGGGAGCCCCTTTGTAGACTTCACGGC

>NM\_007707-Mouse-91mchr11\_P019737chr11-117639175117639875mchr11\_00074  
tgagaaccgaagatccctgattcccgtcatactcagactggggccctcgggtttctcctgtcccctctctcacatatctc  
gggtttggcacccttttttcgcccctcgcactgaggacaccggactgagaggcgcctgagcgtccctagggtcctt  
gtgtctctcccctcctggcggcgtcctggagaccactccacgcgagttttctctgggctcctcctaggggcg  
gcaggggaagagactgtctggggtggccggcagtgaccgaggacagtcagttccgcgaggtggctgggctgagacac  
ggtctaaagcggggcaaaggggtgcccgggcctaggcggaggctggaggggcgggcacgctggagggttccgggact  
cacgcctcagcgtttgtctctcagctccccgggatgcggtagcggccgctgtgaggaggccgcaagcagctgag  
ccaccggcgcagatccacGCTGGCTCCGTGCGCCATGGTCAACACAGCAAGTTTCCCGCCGCGGGGATGAGCCGCC  
C  
CCTGGACACCAGCCTGCGCCTCAAGACCTTCAGCTCCAAAAGCGAGTACCAGCTGGTGGTGAACGCCGTGCGCA  
AGCTGC  
AGGAGAGCGGATTCTACTGGAGCGCCGTGACCGGCGGGAGGCGAACCTGCTGCTCAGCG

>NM\_013468-Mouse-92DBTSS:NM\_013468chr19-3534272035343420mchr19\_00061  
tggcaccagacctctcctcccctcgggtgattatcccagaaataggatgtccaaagcaacactcccagcaa  
ctggagtgtgataagtccagttatcagaaagatatggctgtaagtgtgatgcacagtgcttgattttctgatacgtt  
agtcatatgagagctgacaaagaaggggaaagagcagcagtggtgcaatattaacaggcagctgtcccctggctccc  
gatacgtgggatgactcgcattgctgagcgggtggtcactgccaaggaatgacctctcacatttctcctgattcgc  
atacggcggccagcttgatctcccctctgggctcccagacactaagtctggaatgaaaattcacctgcctctgaa  
ttggcactgggtggggcaggggtgacttgctcccaggctggaagattatctaccagccctagctatataacgg  
gctggtgtggagggtccaCAGGGCCAGTTCCAGGGTTTCATCCACAAGAGAGAAAAACATAGACTCACGGCTGCCA  
AC  
ATGATGGTACTGAGAGTAGAGGAGCTGGTATGTAAAACATCTTTTTTTTTTTTTTTTTTTTAACTTGGCTTT  
TATTTGA  
AAATACAGATGGTTTTTCTTTCAGGAATAATGTGGGGTTGGCGTTAGTACTTCCTAA

>NM\_198301-Mouse-93mchr15\_P018536chr15-2772008627720786mchr15\_00484  
ttatggaaccctttgtcaagaatgctctgttcctaaacagttccaagcacgattagccgaatgtgctgac  
ccatgcagaaagacgaggaagccctgcccacgtatggaacaagccccgggtgagttgcttttgatcccagcctca

gctctccggcgcagacatagcaggttctcccggtggaacagggaaatcgaggaccaagctgtcctgagctggtgaggg  
gcattcggctccctcggccatcagctcttcccccaagttctctggctctggtcagagctcccagaggactctagatcc  
gaaccagtggaaagcccagggtgagcgtggaggtgacccctaggggagagccgaggcctccgagcgcctccatcgct  
gagcttctgagctttccacgcccgcgccccttcacgctacctcgcgaggagctccgcccctagactccgcccctagctt  
ctgagtgccggcaccggcgTCAGTCTGCGTTCAGGGCGGGAGCACGGACGGCTGTCACAGTAGCTGAGCTCGGGACT  
GC  
GGCTGCGGAGAAGCGAGCGGGGCGCCGGGCTGTAGCGGAGGGTGCAGCGGGGTGGGAGGCGCGCATCCCGCAT  
GGAGGCG  
CCGAGGAGCGCGCCGCGGGAGCGGGAGCGCGCTCGGACCACCTCAGGTGGGCGCCGGGAT

>NM\_008567-Mouse-94DBTSS:NM\_008567chr1-128195097128195797mchr1\_00080  
agttaaaggtggtgactgtctcatgtagctgtaagaaacaagctgggtccgctcggaatgagttactcttaagcct  
ttgctcctgtcctccactgactttaaggggctctcctgtagtttgggttctacacttacttctccagatgca  
caattcacagtaggttaaccctgagtgacaaaaacaaaaacaaaaacccaaaaagtctatacataaactctggggg  
taaagggagagagggaggggttagctcctcaagccaaacaaccagaggggtgggtgactacattgcgcatgggcaaaa  
gcttcatggcgtatgcttttggcgcaaaagtgcgtgaggggggctctgtacggaaccgcatgattggacggg  
tttggcgcaagtagctcagctcctaccctgttattggctgaggtgagagggcggggtagccggaggcgcgcgcaagt  
ggcagcggaaggagctacGCGTGAACTGCGGCCGGGCTATCTGCAGCTGCGGACTCTCCTCCGCGGTGGTCTTC  
CC  
TCAGCAGCGCGTACTCTCGGCGCCGCATGGACCTCGCAGCGCCGCGGAGCCCGCGCCGGAAGCCAGCACCC  
GGAGGT  
GCGCGACGAGGTGGCCGAGAAATGCCAGAAGCTGTTCTAGACTTCTGGAAGAGTGAGT

>NM\_029499-Mouse-95mchr19\_P002199chr19+1065446210655162mchr19\_00607  
atcaataaccagacactgtagattctgtacataaacatggtgttccgcatgtggttaggaccgctggtatgg  
ccatgatgatgtgatcgattggcgagctgctgctctcagcacaccagttactacagcccctgatcagctcacagctg  
ttcacatggtgcatcctccttcttggagaacacaaatgtctgcacggcagttttctgtagcagagagaatcaggac  
ctctgttccgttctgagaatgaactcaattgacaatgagctgtctcacagggatgagaaaagtgaggggttttctgc  
tgccagttttgtagcagccagaagatccctgccttcagaagtggccagatactttatgctggatccctatcaggtgc  
ttaaagccatttctctatgtcctaactcactgatgagattagacaaggaagcaaatgaagtgtcctaaaagaacac  
gtcagctcaggggaaagctGTGCACCTTGCTGTCAATTTGGCTTCTTCATACCATCTTCTGGTTCCCATGAGCCACAG  
T  
TCTTTCTTCAGTTTTTTGCTTTTTTATTATCAGACTCAGTTTCACTTGCCATTTCCCCCTTTTCCTTCTTCTTTT  
TAGTTT  
TTGGTTCTGAATCGGGAAACAGTGTAGCTGATGTGTCTGTTGGTTAAAGTGTAAGTTCT

>NM\_029499-Mouse-96mchr19\_P90016chr19+1065753710658237mchr19\_00607  
cccaggagccacctgagctcctctgattcatctctcccttttgggctctcctagacttttgcattgtacaatgg  
atcatgcctgtgtgaaagatacagtgagatcatgaagtaagtactcaatgtacaatagacaaggaaataatgctcctg  
ctgctgttctaccctaatgttcaactcccttattgccttctcctccccatccacccttctcccatcagtcattat  
ggtttgggatgctacactgtaataatataaccacaaatgatactgtctatattctcaataaaagtgttatttgatttc  
aaaatattaccatattcattgtctaatgacaatgatttctacctgaatcctcagagtacacatccactcatgtatg  
atggctgaagtgggtggggaggaaatgccagaagcaaaaggttctgcctcttagtcagtgagggggaagtctggcaca  
ttaaccagctctctatctacAAAGGGGAACAGAGTCTGTGAGAACACACAATCAAAACTTCTCCTGGAATAAATCA  
TC  
TGACATCAGATCCTTCCCATTGTCTGGTTAGTACATCTTTTTATTTTATTGGAGGTTGAGGAATAAATTTTAC  
TTAAAAC  
AAGTTTTCTAAAGAAAAGACTTATGTTTTGTTCTGTAACATTTTATGATTAATAAATAATCT

>NM\_010931-Mouse-97DBTSS:NM\_010931chr17+5458209254582792mchr17\_00275  
ctgagcctcctctccggcctgtgcacacggtagaccgaaaactggcataagttcccgcgctggctcggggcat  
tgcacagccactgcgcatcgtgcttctgcatccgttgaggggcaactgagaggaatcctccacgctgcacctggttt



tcactctcctgggtgcccgtaaagtctcgcgggaaacgcgtggggctcggcggggaagtgcacgaggctccacgctaaga  
gaggacactccccgagattcaattgtcgcgcccagtcgggtttcgcgcccaggcgtctccgaggtcatctaggccaa  
tcgatcgcgaggaggcggggcacgtagcccgggaggccaatcagcagcagctctccgggaaggcggaactaaac  
ggcgggctccagggtctggcctgggcccggcggcgatgtggcgtgggctctgtcctccgggtctttaaacgpc  
ctttccggaggccagggtcTGTGTCCCGAGGGGAAGTTAGGGCAGCCAGCTGTGGGTGGGGTTCAGGTGAGTTTGTG  
GC  
CACAAAGCGCGCTAACGGGTGGCCCGGCCGACTGCCGTTGCCATGGCCACGGCGGGGGGGTGTCTTGCTC  
TAAGTA  
CGCGCGGGGAGGCACGGGTCTGGAAC TTTGGGGAGTCCTGAGTGGTGTGTGTGTGTGT

>NM\_010931-Mouse-98mchr17\_P007137chr17+5458116454581864mchr17\_00275  
gcatgagaccatctgtagtgttctgtactcaatgagctcagacctgacatggggtgcagggtatctgggtgggaggc  
accctcaagttcccctaggggatatgaatatagattcagggtgcttagattaagaggtaaagttgtccagctcaga  
aggaatagacatgtagtgggtcagaagtctcggggtgggtgggtgtcctttctcctcccaggaatgctatgaggt  
ttacatgggtgggggaactgggccttctgttaaagtgagcatagccggcagggaaagtccatggcccgttggcgaggcc  
gggggtgggtagatccttagtcagcagccccacttgccttcccgccacagcagcccaatcaggaat  
caagagccctcccccaattggggtggaagtctcccgcagcagcctgtgcactaataaaaacgccctgagtttgc  
cgggaaaaaagtcttagcaGCTGGAAGGAACCCGCGCTCTAGTGCTCACTTGGGTCTTCAGCCACTCACGCGGCTCC  
CT  
TCTGGGTCACCCAGCCGAGAGCCCTAGCCTAGAACCAGGCGTTCCAAGGGAGAGGAGAGTGCGGATCGCCGC  
CGTGAGA  
GAGGTGAGTGGAAGAGCGCGTTCTATGCACACAGTGGCACGCGGGCACCACGAAAACT

>NM\_028963-Mouse-99mchr11\_P029263chr11-7181981471820514mchr11\_01190  
ccatgataaaaatgagggtcatccttgggtggggcagtaaggccacagagacggggtacagctcaggcgttctgpc  
gggtctgcaggaccaagatcctcatctcatcccactttctgacttcagcaggggccttctcttagcactgctgtggcgc  
agcaacccccagtcctgggtcccagcctcaccttccacgcagtcggacaccagctcttcccttcggtatccttagaacg  
ctgaagtaggcgaaaatggcttgcctcatgctcctcactgccttgcgaactcctcgaagcccagcacgctcacctc  
ctcgaaggtggccatgggtacaacagtgccggagaggagcacgggaggagccctagggtcctgcgcccccaaggcggggcc  
caagtaaggcgtggacaaggttccgggtggcgggcgccgcagcagagtggtgctacgggagcctgaatagccataa  
ctccttagggcctcttttGGTCTGTCTGGAGTTTCTTTTTGGCGCCAGTTTCCCTCAGACA ACTAGACGCCTGACCTGG  
TCTGGTCCCCACCCTGGCTTCATGGACAGTGACGGCAAAGCCCGTGCGGGTACAACACCTTGATCCTCAAATGG  
CTCAGG  
AAGATCAACGGCTCCCAAACAGCCGCGCCTGTTGCCATGACGACTGGGCGAGAGGCCG

>NM\_009689-Mouse-100DBTSS:NM\_009689chr11+117519945117520645mchr11\_00165  
ccccctccatcccagggtgtctataggaaggatggcggctgctcagggaggagggtcctctgtctcctaaggcgc  
ccctccaccagcctgtgggtgggtccgaggcacttccattccgatatctagctggccaaatcctgcaaaccttgaggcag  
gaagaacctgcagacatgggacttgcagcggacatgctttaaagaggtgccccaggcccgtccaccgctcggcca  
ccctcgtgtccttggggagcagctgcggaagattcagtcagaatagcaagaaggaaccgcagcagaaggtacaactc  
ccagcatgcctgcgcccacgcccacaaggccaggcgcagatgggctggggcgggactttccggctgcctcgcg  
ccgtccactcccagaaggcagggcgaggcgtggggcgggctcctccggcatgctctgaggcgcctccgcccgc  
gagatttgaatctgcgtttGAGTCGTCTTGGCGGAGGTTGTGGTGACGCCATCATGGGAGCTCCGGCGCTGCCCCAGA  
T  
CTGGCAGCTGTACCTCAAGAACTACCGCATCGCCACCTTCAAGAACTGGCCCTTCCTGGAGGACTGCGCCTGCA  
CCCCAG  
AGCGAGTGAGTCCAGCTTCCAGCGACTCCACCCTGGGCCCGACGGTGCTTAGTTGTGT

>NM\_009689-Mouse-101mchr11\_P017174chr11+117518456117519156mchr11\_00165  
acaagtacacttttgagctgggctggaacgatagctcttggcagagtgctgacctagcatgcatgaggccctgtgt  
taaatcaggcatggtggtgtgtcctataatcccagcatttgggagatgaaggcaggaggatcagaagttgtttatgaa  
ttcaaggctagcctgggccaactagaccctgactaggggttttctttgttttactccagttgggcacgtaacg

acgacctattattgtagcactagggagtggtgcttggttttgcgctaccacacttctgcttccctccaacctccaat  
gctaggaagaaaggaggttagaggggaagggcgtagacctttaggctacttctgttgattgggatactgggctc  
cttgggctgtccagcttcttcatcattagaatatccaacttctgtctgcttgaatattgacaaactgcaac  
aacagtaaccaggagcagcaGGTGGAGCAGCAGGGTTCGGGAGCAGGAGCAGCAAGCAGTGGGAGCACGGG  
GAA  
CAGCAGGGGGAGGAGCAGCCTCTTCAGAGCACCCCTGTCTCTCTCAGGGCTCAAGGCATTTATACCTCTAAA  
GACTTCC  
CAGAATTCCAAACAATAAACGCTCTCCTGAAGTTGGCAAAAATCACACCCTTGCGCAAGG

>NM\_024495-Mouse-102DBTSS:NM\_024495chr3+1472277014723470mchr3\_00416  
tatgcagggccaagtctgaagatgctggagtaagcaaaaaggaatcagagaagtgagttatgcagatggaaaggctgga  
gctgtcggggaagggagggtggcccggggaggtgagcacttctaactagtagtcttattttaagtggtggttattac  
agctatcggcattgatgtatgtgcatgtgtaatcaccactgcccactcatcaaggtcccctgcattcccagacaagat  
ctcaactccagcagcagctcctgctgggtgagtcattccagaagggcttttctggggtgacttctcagaaggcag  
gaaatccccattggaaacttctggctgctgagcacagatcccttcccactcgggccccctgcgggtgacgaccg  
tgccctcgggttcgggtcccgggtcgggtgctggggcggccccgccccccagcctccttgccg  
ggcgcctgcccaggtccaCAGTGTCCCTGCCACAGGCTCTCCATCGAGGACCATGGCGAGGCTGAGCTGGGGGTAC  
GG  
CGAGCACAACGGTGAGCGCGGGCTTCCAGAGGGGGCTGATGGGGGCTTGAGGGAGCTCTGAGCCCCGTGGGGG  
GGTTGGG  
GGTCAGGGCCTGGTCCCCGCCGGCTCTCTCCAGAGTGGACGGCGGCATTCAATCAACTTC

>NM\_011331-Mouse-103DBTSS:NM\_011331chr11+8171467481715374mchr11\_00020  
gaatgaggaacgaaagagatggctggcagactctgaggaatgacctgcccatttctcagggttattggagcccaact  
gagttctgagaagccatctgctttacgatagcagtggtgtaataaaggccagagtgaaaacttagcctgacac  
cctcaaaaggcagattctggcctctcttaccctctgtgacttctagtttcttccataaagatgttcttccat  
ttcaagaaatgagaaccactatccagtgaagtcaattcctattgctggcctcagctgaataccttccccatctggtt  
cgctgtctaaactaagcagtagacagaaactgtacagttccttctggctgagaggaaatcacccctggggtctcagtc  
ttactcagcatagctgaggtcttactctatccttctctgtaggacctgtcaggtcttctgtcttataaaagt  
cagatggaactccagggaGCAGAGACACTGGTTCCTGACTCCTCTAGCTTTCATTTGAAAGTCTTTGACCTCAACA  
TG  
AAGATTTCCACACTTCTATGCCTCCTGCTCATAGCTACCACCATCAGTCTCAGGTATTGGCTGGACCAGGTAA  
GGCTTC  
TCCTTCCCCGATCTCTCAGCACATTCCAGAGCTGCTGCATGGTCTGCAGTTTTGAAGAGA

>NM\_172301-Mouse-104mchr13\_P008737chr13-9750876497509464mchr13\_00464  
aaacttcatgctatcaacctcaaatccatcccagatagctgttggaaacagtcataataagaccgtctctgcaaaaag  
ctttcgggaacttcaagatagattggcacttctatagaagaggatgagaaacaataaaggacaacagcaaaactga  
tatgcgtactccccacagtcatttctaaagtccaacggagtcgctgggctagcttgacagcacacaagtgagcact  
gcacgccatgctacctaaggcaggtggcagcaatgcgacttgtgagcaggtatagagcctgacctcgcgaggggtgggc  
ggtgctgccagcggcagcctcgtctgccccccccccccccccccccccgaactgggatcgcgggatcggccagga  
aacgcattctacgggaaccgcccgcgaatgggaagagagcagtgccacgaactggccaatgaggagcagcggcccc  
gggttaaacctaagcccggCAGACTCCTCCCGCGGTGCTGCGGAGGAACGGCTGTTAGTGTGTTAGCTGTGGATAGCC  
AG  
AGGTTAGGGTGTCTTCTCGAATCGGGGAACCTCTGATTTTTGGAGGAGCCATGGCGCTCAGGGTCACTAGGGTG  
AGTCGGG  
CCAGGCGCTGCGGTGATCGCGCGGGAGAAGACCGCGGGATCCCGGAGCGGGAGGGGGAT

>NM\_021325-Mouse-105DBTSS:NM\_021325chr16+4472299244723692mchr16\_00206  
tagtaatctaccatggcatttcaagtagaaatattattctgcattaaagactgaggaagggtatacacactattatt  
attattattattattattattattattattattattattattattattattattattattattattattattattatt  
caagcacgcccgaataatcgcataaccctctcagtttgaatggaggttagacacatccatctgtcttgggcatg

ttcagagccttactgtacagtttatctgtgagcagcaggagaagagaaagagccaatgggctgaaagtaaccactcagt  
cagcttctctgtctttgcttcacgggttctgcacaggaatccattgctgtgtcaagtcccagagaagtttcttctcttc  
caagccagactaaagcacgcgagtggaaggagttggcaggcaggacgggctgctccctgcgatgggtaagaggtgcg  
ctaccacgcagaagccaaccCGAGAGAAGAGGGATCCGGGTATGGTCACTGCTGCTCCCTTACCTCTGAGGAGAAAA  
AG  
TACCGAGTGAGCGGCGGAAAACCCAGAAAACCGAAATGTTTTGCTTTTTGGAGAACTTCTGCCCTAGCAGTGCTC  
TTAATAT  
GGGGGGTCTTTGTGGCTGGTGAGTCTGAAATTTTTTTGGGGGGTGTGGGTGGGAGAATGA

>NM\_007659-Mouse-106DBTSS:NM\_007659chr10-6912330469124004mchr10\_00645  
gtttctctgtatgttagccctggctgtcctggaactcactctgtagaccaggtggcctcgaactcagaattgcctt  
gcctttgctcccgaagctgagactaaaggtgtgtgctaccacgccagctaataacaagctcttgatgtagtgtact  
gtcactttgggtggctgtatctaaattcaatgcatttgaattgtttagtcttggaggaaattacacacagaaggtg  
gctggagaaaaaagagaatagattagactgtccagaacaacaggacgatattggaagaaaaacagagctcaagagtcag  
ttggcggccctctgcaattcctctggcccggtttccgctcccttcgctctctgctcccaggcagccccgccc  
aagcgtagctcagctctgattggctccttgaacgtctacgtgcaatcgattggcgatccccgggagctttaccgccc  
gagttgaaactgctggcacTCGGCCTCTAAGCTCCTGGAGTTGCTGCGTCCGCGCAGTCCGGAACCTGCGGTGTGGCCC  
C  
AGCCGGGACAGAGAGGTATGGCGTGAGTCGGACTGGGTGCAGGCTGGGCCTGCGGGGGCTCCACGGGATCTGG  
GGTTCC  
CCCGGGGAAGGGCAGGACATCCATGTGAGCCTGGGGATCCCTTGTGGACGGGTAGGGCCT

>NM\_007659-Mouse-107MMU69555\_1chr10-6912331069124010mchr10\_00645  
gacagggtttctctgtatgttagccctggctgtcctggaactcactctgtagaccaggtggcctcgaactcagaatt  
tgccctgcctttgctcccgaagctgagactaaaggtgtgtgctaccacgccagctaataacaagctcttgatgtagt  
ggtagctcactttgggtggctgtatctaaattcaatgcatttgaattgtttagtcttggaggaaattacacacaga  
aaggtagctggagaaaaaagagaatagattagactgtccagaacaacaggacgatattggaagaaaaacagagctcaag  
agtcagttggcgcccctctgcaattcctctggcccggtttccgctcccttcgctctctgctcccaggcagcc  
ccgccaagcgtagctcagctctgattggctccttgaacgtctacgtgcaatcgattggcgatccccgggagctttac  
cgcggcgagtttgaactgcTGGCACTCGGCCTCTAAGCTCCTGGAGTTGCTGCGTCCGCGCAGTCCGGAACCTGCGGTG  
T  
GGCCCCAGCCGGGACAGAGAGGTATGGCGTGAGTCGGACTGGGTGCAGGCTGGGCCTGCGGGGGCTCCACGGG  
ATCTGGG  
GGTTCCCCCGGGGAAGGGCAGGACATCCATGTGAGCCTGGGGATCCCTTGTGGACGGGTA

>NM\_011799-Mouse-108DBTSS:NM\_011799chr11+9857848498579184mchr11\_00222  
tacattcattgtctatgccatacaggaccgcccccaaaaagtaggctttagccctctaaaatctagcccaccag  
aataatgaaaataggatgtttggcagataagatgagcaaaaggtagcccagtagaatgaggacgttaggcaacggtgggg  
aggctgggtggaggacaagtagaataaaaaatacggaaagtagatgtgctgtagaggcaaaaaaaaaaaaaaaaaaaaa  
aactacacttcccaggctttacggcgtgacgcgctgtaaacgcgctccttctccagggtctcaaaagttaacgc  
cctccggggcagtggtgtgacttctggtgctgctgagacctgggctgtcctattggctgcccggccgtcaccggcg  
aaggcgtggtgatgagtacaactaatcagaagcctggctggactttggcgggagacgagaaggctgaagtagagcggct  
ttggcgcgagttgactttgcAGCTGCTGTAGAATTTGTGGCGGGAGAGTTTTTACGGTGGTGATCGAGACGGAGGAG  
TG  
TGCCTGAGCGACACGGCCCTGAAGAGTGCAAAGCTCCGCGAGGTCTGGTGTCCAGAGAGGTGAGGCTGGTCC  
GAGCAAG  
GCCGGTGGAGAGCGGGAATCGCCTGGGGTCTGAGGCTGGGTGAGGGAGGGGTTGTGAG

>NM\_011799-Mouse-109mchr11\_P013051chr11+9858898398589683mchr11\_00222  
attacagaagtaacctgatcccctctttgacttctgatacgcatttaggactggtttcagtgcccttctgtatagtaa  
gctatacagacggtgacttcaactaaatacaaggaatgttctaatagcacagaaaataaggttcccagcactgaagatag  
gcaacaaaaagttggcgagacgtccaggatggtggccataaccagtgattccagcactcagcatggtcactacaagttca

gggccagcacaggggactcttaaacatgaaacagggaaaatggggtaggtgtcgtgctgggattgttttagagggggctt  
tgccattgtgtgggagtaaggagagacttccaagtcccttcattgtgggactgtgctcctccgttgggagctctgg  
tttctctattagcctctcagcttctgctgttgtaagcaatcgaagcagattgggtgggcaagtgcagatggcc  
tcaggaagtaactgcaggcaTGGGTTGTTAGAGAGCAAGCCCTGTCTCTCACAGCAGTGCTTCTCCAAACAGTGGGGC  
CA  
TGGGCCTCTGTGTGCTCACCGCTGTGCTCAGCTTCCGGCTCTGGGGAGGGTAGGTACTACATGCTAGGCTAGCC  
CGTGGC  
ATTTTCTCAAGTTTCTTGCCAAATAGTTTGGACACTGTGACTGAACCTCAGAGGTCATTT

>NM\_026560-Mouse-110mchr4\_P025065chr4-123307027123307727mchr4\_00207  
ccacgctgcagagtggagctgtgtcctgtctgtaaccgcgacactcaagaatattgattctggcgtcctcttacct  
tctctctcaggaagaccgttgcctcgggtctccgaaggggttctcacgacagggcaatctgcttagactcagat  
ctctggggctgtctgttccgggacctgtgctctggagtcagcttctgctcctctttaagattccagccctaaatc  
aacagggaaaacgtaaatcctgcgatgtcaacgctgagtacatcaaaaactacaccgcttattcacaagaacgaactca  
ccactctactccagtttagcagactctggagtcgcgaaaagatggcgtgtgcccgaatgacatctgggcattgaagtc  
tccatgaggattggctggcgggaaggagaagaagctttattgtgattggcggtgggagaaccgtcctaagacggcgatt  
gctattggctagctgtgccCGTTGAGTTTGAATTGGGTGGCGGTTAACCGAGGAGCCGCCCGTCCCTTAGTTGGAGCT  
G  
TGAGGGTTCCTCAGACTGTGTTTTGGGACCTGCAGGTAGGTTTCGGCAGAGTTCTGGAAACCTAGACTCCAAC  
GACTGAA  
CTTCTCAGCTCTCCGACCGCTCACACCCTCTCCCCGTCTCAGTCGCGGAGCCGGCTGCT

>NM\_026014-Mouse-111AF477990\_1chr8+122042158122042858mchr8\_00112  
catctcgtcatgggaccggacactcagcagttgcgtgtgactcagaccagctactgggtagcctggagaccgggt  
agtattttgtaaatgggaacaacaggagcagaagtgtctctttcacgtgattgcctcttctgctggccaagagctgtca  
gggcccagcccgcgtgtccacaccgcgccaagtggctttagaaccttacgcaccacagccccgagcccgggaa  
accacgcgatcgcgatgtactacgctgcacgcccagcgcgagcgcacaggagtcaaatagtctctgccccaaacc  
tccagccccggcgctccattctcggctctcaatcaaagctgccggggggtggggccggcatggcgatgcgtct  
cttggtgctactagcgcgatgccccggagcgcgcaattccccctcccagaactgtgcgtgggtgacggcctggg  
cggggcgaggctgaagccgGAAAGTTGCGCGGAATCCGCGGGAACCTACCTTTTTGGCGCCATGGCGCAAAGTCGTG  
TTA  
CCGATTTCTATGCGTGCCGTGCCCTGGCCTTACGACTCCGCGGGCCAAGTCGATCTGTCTACCCCGAGCCCT  
GGTGGC  
CTCGTGGCTCCTGCGTTCACCCGGAGCAGCAGCCGCAAGCGCGCCCCGGCCCCAGCCGAA

>NM\_007697-Mouse-112DBTSS:NM\_007697chr6+103889662103890362mchr6\_00602  
aagtcctatgcctcctaaataaagaagcaaaaccggcaagactttaagaaaaaaaaaaaaaagtggtacaaggtacc  
acaccctcagccatacagcaaagggtaaaagagactgggagcctgtgtggaatgtggacagaggagggtggaccagg  
gagcagaggggaggggttctttcgggttctcagtggaagcgaaccggcagctaccctgtctctttagggcttag  
agatgttaaaaatgacaagcaaagtttctcttctcctctcctttcataaaaccaaagtctcaagcctgtagctgcct  
cttgtccaagggagtggtgtaagagggggaaaagaagcgtgtgggtgagggtggcagagcagatccggggacag  
cagaaaagaggcgcgagctagctcctcggcaggaggcgtggataccggtacaagctcgaacaggtccagcctctgg  
agacctgtccaacagcaggAGGGGGCAGACGGGATCTCTGTGGGCAGATCGGGGTGTGGATCAGCGGGAAGCGCCC  
AAC  
TAGAAACTCCCTTGATTCTCCAAGAGGCGCTGGACCTCGTTGGTCCCCTTTGCCCCAGTGATCCAGCTTTAGG  
AGAAGT  
TTTCCCAAGAGAAGGTACCAGACAGATCGGATGTCAAGAGGCGGCTCAGGTGAGTCTATT

>NM\_010819-Mouse-113DBTSS:NM\_010819chr6+123913393123914093mchr6\_00821  
ttatcataagactcccacttacgaacttagtaactctagtagctcctgggtccacctttaaaccacaagaag  
tgtttatggcttaacgaataaagttggaggaacacaaatgtccattcttaataatcctgtaggtggaaccagagatc  
acaatagtgctatatacaacctttctccttgcgtaacaagcctacttctactctgagaaaatgtgaaatc

taatcagtggtccaccaacttctcctctgttctaaagcaaggattcatgctttacatgacccatgtgcacaaaat  
ctatgttaaaagcttggcattgttatttggacatatttcattgagctagagaacttctaagcctcattttacctca  
aactaccttggaaacatgacatatgagtagcaaaaacacattgagaaatcttaccatgacacactctggaagttttac  
tggctttggggtgctttctCAATTTCCCTTTTCCTCTTTGCTCCCTGTGTTCTAGTACATTAGAGGAAACTCTGTTTTTA  
AGATTTATTCTTTTCACTTGGCTCTTGTACTGAACACTTACTGATCTTACCAGAATAAGACAGATGTATT  
GATGTCC  
AATCTTAAATGTTTCTGAAGAGATACTTGTGATGGAAATATACACTCTGGGCAAGAAGTA

>NM\_010819-Mouse-114MMU301679\_1chr6+123913624123914324mchr6\_00821  
gttgaatctaatcagtggtccaccaacttctcctctgttctaaagcaaggattcatgctttacatgacccatgt  
gcacaaaatctatgttaaaagcttggcattgttatttggacatatttcattgagctagagaacttctaagcctcat  
ttacctcaactaccttggaaacatgacatatgagtagcaaaaacacattgagaaatcttaccatgacacactctgga  
agttttactggctttggggtgctttctcaatttcctttctcttctcctctgttctagtacattagaggaaact  
ctgttttaaagatttcttttcaactggctccttgtactgaacactactgatctaccagaataagacagatgta  
ttgatgccaactttaaagtttctgaagagatacttgtgatggaaatatacactctgggcaagaagtaaaaagcagact  
ggaatctctgacacacataATGTGGCTGGAAGAATCCCAAATGAAATGTGAGTCTCTCTTTTATCTGTCTATCTGT  
CT  
ATCTGTCTGTCTGTCTGTCTATCTATCTATCTATCTATCTATCTATCTATCTATCTATCTATCTATTTATCTACCTAT  
CTATCA  
ATCATTTATCCACCCATCCACTTCCCCTCCTACTTTCTTTCTCTTCTCCCCTTCCTTTC

>NM\_019948-Mouse-115DBTSS:NM\_019948chr6-123941461123942161mchr6\_00626  
tcttgtaaaagggtcagattccacacagtgacacctaagagctgtaaaaggaagaggaacagaaaggacctaaagaaa  
actttcattgccaactgtaaatgatcattatgtcccagctgtggtgtgggagagataatttagaggctctcag  
cctcctgtctgtaacaaatgtatacttgatagaacaacaacaaaacaaacaagaattcagaatgtggtactg  
aggcacatagtgccaaggaaaatcgggaccaagttagactttgagaaaagtaaggcattaccaactaaaataacacag  
atatatttccaggctcctgcccattctctgtgcttagcatatactcatctttctctttttgtggtctggagtg  
agaattggcggtggtccactaaactcctgtccttgcaagagagaaattctgacttaattgcacatctataaagca  
cgttgacatactgtctatcCGGCTGTGTTAGTCTTGAACTTTTAAAAAGAGGGCCAAGGATTCACCATTCAAGACTCAC  
T  
TTCCAGGGGCTCTTTCTAAACTGAGAAGAGAAGGAAAAGGAAGAAAGGCAGGAAAAGGAAGAAATGAATTCA  
ACCAAATC  
GCCTGCATCCCACCACACAGGTACAATCTAGGCATCCTCCTTGACTCTCTTAGAAGTTTG

>NM\_020008-Mouse-116DBTSS:NM\_020008chr6-130134095130134795mchr6\_00591  
cctccaagagaatcattcgtttgtcgtgctggagtgtgtctttggatgctcagctgtgattcctccatcaggcaata  
aatttccttgggagacctccgcaatgctccgactccaggcagttatagatttactacaatggatggcatgaa  
cacatgaaaggatgtgggatgcaatcagagttaacaagccagtgctgaattcaagacactcaactgcttaaaagtt  
tatgtagccataccaattaatcgtgctagttcaatggggagttaaccaatgtctttaaagactgtatgcaatggatc  
agtacacagttgatctaaaacagcagtcagtcacacacagcatttcagtttctcagaagttacagcctcagaaca  
ggatctagaggaaaaaaggaaatctcacaagcgttttcttctgcttgggactggctgactactaagctgt  
gctccatgaacctcgcaagGGCTGTTTACAGGGTTTGGGTTAGTGAGCCTCATCCTGGCAGTTATTTTATAGTAAAGA  
AC  
ATTCAAGTGCTCTGCCTACCTAGGGCCCTGTGAAGCAATGAAATATCACTCTCATATAGAGAATCTGGATGAA  
GATGGAT  
ATACTCAATTAGACTTCAGCACTCAAGACATCCATAAAAGGCCAGGGGATCAGAGAAAAG

>NM\_009898-Mouse-117DBTSS:NM\_009898chr7-114179200114179900mchr7\_01055  
gagcactactcatttgcctcatagccccagcagacaagcagtgctccataatgccagttatttcttctcggggc  
tcaatgcccgaagcagaggacaagggtgtccccgtgaagccctaaatccctagaaggagaaatgaccccccaaggc  
ctcccagaaatccatttggggtaacacaggagaggtccctcctgtagcagagaaggctcctcaagctggtgaagccgtt  
ctaaagcttctccggtgcccagggaaggacctcagaggagcagggcggtgggggagggatgaaggaacgggatatt

tttgcgttctgacattaaagaagagttgattcgcgtcagcatctgttcgggggttgagctgacagcatggggagcggg  
cccagctctgagccctggagcgaagggccgggctccatgagctcccccaggggcgctaccaccggaggaggccg  
gcgcacggccgctgctcattCATTGTCTTGACAGAGCATCCTCGGTGGCCAGCCTGCAGCTCCTCCATCCTTCTCTCCT  
T  
CCTCCTTACTTGGGAGGGGTACGCTCAGCTCTCCGACAGAGGTGAGGCTGGGCGCCGGGGGAGGGCTGGTC  
ACAAGGG  
CCAGGCAACGCTGCCATGGGCCACCTGTGGGGCCAGCGCCAGTGTGGGGCAGGACTGTG

>NM\_009898-Mouse-118AF427040\_2chr7-114178533114179233mchr7\_01055  
tggggccagccagtggtgggggaggactgtgggactgtggggcgggagctgtcagagccaccaggctggggagac  
agagccggttgtgagccccgaggagatcgaggacgaggagttcgaaggggcaagtagtcccagagtgtccaag  
gtgagggttaaggaccatcgtgaccaagatggaggtgggctcctgggagcggcctagctgggctcagaacctatgccc  
ggggaggagcttctgaaggtgggggatgcaaggtggggtgagccaagtagctgcctgagctttgagacaggaaggggt  
tgagtgcaaaaacaagactaagttccccttccgtggttccgggcttgtaacctgggtgggggaggaggccgggtggggc  
acatctccgcccctacctggattgggcttctctcccaaatccagactgctcactggggtcttgtgtccccttct  
gtcttgagacttctcagGCACTTACCTGCTTTTATTTTAAATAGACCTGGGAGCCTCCTTGGTGATAACCGGGGTG  
T  
GCGAGGACTGGAGTCCCAGCACGAAGGGGCTGAGTCCCCATTAAGGCAGAGCAGATGGGTGAGGCTGGGGAG  
GTGGATA  
GAGGCTCTGGGCAGGATGCCTTCCACAGCGCAGCCGAGGTTCTTTACTGAGCAGGAAGG

>NM\_172442-Mouse-119mchr19\_P011373chr19-1175099711751697mchr19\_00396  
ccaagcaataatgtgaatacaggcttcaatccccttagtcagaaccactttatattacttctcttttagccattgat  
gatcaaaatgagcagctagctgtgctttgtctgtctcatggttttattacatagacactgcaggatgaattag  
tctacctgtgtcttaacagaaaaattggacagcaagaacttcttctctctatgtaaaccagggaaaccttgga  
ctggctctcgatgggtcacaagtgtgtggccttgacctgcaacttgaggatttgaccagcagggggcatggaagcttag  
atcgctgtgctagtgccatggggcgtgggctttgcatctttgatggacagctagggaaacgggtgagacagagatgagg  
taataacggacagacaagagagcgtggggcaattcctgtgtgtgtgtgtgtgggtgggggtgttgcgtgcgtgtg  
tgggtgtgagatgtatgtgtGTGACAGAGAGAGAGAGAGAGAGAGAGAGAGAGAGAGAGAGAGAGAGAAT  
GCCG  
TATGCATGCACGAGCTGTAGGAGATGCGAGCCTCTGAGCTCACGCCCGGACACGGCCGGTGCTGAGCTGAA  
AACAGAC  
AGACAGACAGTTCCATATTTGAACAGGCTGCAAAGTTGGGTCCTGGCAGTGGCAGCTGGG

>NM\_172442-Mouse-120mchr19\_P011376chr19-1175049011751190mchr19\_00396  
gagagagagagagagagagagagagagagagagagagagagagagagaatgcgtatgcatgcagcagctgtagggagatg  
cgagcctctgagctcacgccggacacggcgggtgctgagctgaaaacagacagacagattccatattgaacagg  
ctgcaaagttgggtcctggcagtgccagctgggaccggatggcgcgctgctctcagactgggggaccagggaaagcct  
ccggggcgagctgccttggcctctgcccgggagggcgactcctcctggaggccactgagccgagccgagggag  
ggggagctgtgccaccgcggtcggcttactcgaagcggagagagggcggagggcgtgacctgcccgcgatccacgcgg  
gccccgggagccccaggcgcaactggtgcgagggcgggtgcagcgtcgcgctcgggcccgcgccccgggtggctttg  
caaggcggggcggcagtgGACAGGCGGGCCTTTGCATGAAGCCGCTGGACCCCTCGGAGCAGCGGCAGAGGGCGG  
GG  
AGCCCCGGCGGAGCGCAGTCCGAGACGGGCAGCTCCGGGGTCCGTGTCCCAGTGCCTACGCGGCTGCGGACTCCC  
CCATGG  
GCCGACGCTGAGGCTTCCCGCAGCGGTGGGGCGCAGACCGGGGGCGCGGTTGAGACCCG

>NM\_146023-Mouse-121DBTSS:NM\_010161chr11-7914288279143582mchr11\_00739  
aacagacgtgtctaactgaggcaatgacacaactgcacacaccacacctacaagcattctggccaaattctgctc  
agatcactgctcagttcgagcttgaacggcagtgatgtgtgatcttctagctgacaaacacctccacggactcg  
gtgatcctctagctgacaaacacctcaaggacccacatttatgttttcaaatcagctctgatataaaattagaaaa  
gtgatttaatgccacactaaagatgccatcatgtaattccattgaataataactaatttcaaaagcagatagtaggcat



tcctcattcttgatacacaatcaaaccacaacaaaggtgatgatggcattgcctgggggggtgggactggaggggtgtca  
atcagtcaagacaactcctggagagttctgccagctgcttgcctcctgctgcctcctcctctctggcctggcctggcc  
actctgctgtcctccatagcACGATTCGTTACCCAAAGGCTTTCAGTGGCTTCTTCTAGACATCTGCTGTTCTCCTTTG  
C

AGCTTTTATGTAGGTATGACTTCCCAGAAGGTGATATTAATTTTACTCTGGTCATCTCTGTCTCTGAAATG  
CCAAGT

TGAGTGAAATTAAGCGCTAATGGCTTGGAAGTTTAAGCCAGATGGCTGCAAACCCAG

>NM\_026820-Mouse-126mchr7\_P90246chr7+128656428128657128mchr7\_00626  
tttgggtttgtgtttttgtgttttaagattactattatataagtaactgtagctgtctcagacacacca  
gaagaggcatcagatctcattacagatgtttgaagccaccatgtggtgctgggattgaactcaggcctcgggaag  
agcagtcagtgctctaccctctgagccatctgccagccccaggcgaggttttattagggccttttctacagaag  
aaaaaggggaagaggcggggagtttgggaggatgaaggagaggcacagctctgaggctcctggttttaagtaagtaag  
gggggcaaagggatggcatggagcacacagtgaggactcagaccatgggtcagcttgataatgccagatattcatat  
gctgtgatggctaattgttcttagcaactgacttcatctaaatcaactgtaacacaagcatctgggcacacctgggca  
cacctgagagagtagggcgtTTTTTTGTTTTTGCTTTGCTTTGCTTTTTTTGTTTTTCTGGTTGGATTATTTGAGGTC  
AG

AAAAGCCACCTAAATGTGGGCCACACCTTCTGGTGGCACCCACATAAAAGGTCATGGAAGAAGGATGGTTT  
TGCTGC

TTACCTCTTGCTGCTCAGTTTCTCTCTCCTGTTCCAGAGATATTAGAACCTACTTCCTC

>NM\_133990-Mouse-127mchrX\_P001644chrX+2865569528656395mchrX\_00125  
actccaagtccatccagagaaataaagaaggttggtattactattctaggagtcagaactcggaaacaaagggtcag  
agacctaaggctagatgccaggtttccagattcccaggccaaggttctttcctacatgacctgccctagtgtagca  
gggtgcagcctttggcactcgggacaaccacacatcctgatcaaagtgggagtgagaagaggccagcttttgagccctg  
ccacaagctccagggaagtcgccttgggtcttcaaaggactcccaggtagctgtgacaggtggtggcgggagggag  
gccaggtgtcactcgggtgggagctcagagccgcccggcccccaatcccttccactgctgcgccagacgccccgc  
gctcgggttacctgcggcctggggcggggcggccttcccgtctgctgcccggctggtcctcagcgcggcggcgg  
gaagtgggagcaagaacagaGGAGGCGGAGACTGCCGCGGCTCCAGCCGGGCCACGCTCCGAGGCGAGGGGCTGCAT  
GGC

GCGGCCAGCGCTGCTGGGCGAGCTGTTGGTGTGCTACTGTGGACCGCCACCGTGGGCCAAGTTGCCGCGGCCA  
CAGGTG

AGTGTGGTCCCCGGCTGGTGACAGCCACCAGGGGGTTGGGGGTGGTGGTGGTGTGTGAGA

>NM\_008361-Mouse-128MMIL1BG\_1chr2-129119961129120661mchr2\_00814  
aagtgcgtgctctccagaagcccctgtaacacagttgatggagagcacagaagcaccatccagttaccaactccaac  
tgcaagctccctcagcttaagcacaaggaggcgagagaggtgacacacttgggtgtgcatctacgtgctactttg  
ttccgcacatcctgacttaaaatgtacagctaaccaggaaaaccaatatttttaattgacacatctgcacaattg  
tccaggggaaataatgccattccaccacgatgacacacttgcgaatgtgtcactatctgccacccttgacttccag  
ggattagaaattttcagggtagcaatagccttctcccctaagaattccatcaagcttctccccctccccaccctt  
cagttttgtgtgaaatcagttacccaaggaaatttcacagcttctcacttctgcttttaggactataaaacaagg  
gagggaaacaagttggacaACAAACCTGCAGTGGTTCGAGGCCTAATAGGCTCATCTGGGATCCTCTCCAGCCAAG  
CT

TCCTTGTGCAAGTAAGTCTCTCTCTCTCTGTCTCTCTCTCTCTGTCTCTCTCTATCTCTCTCTCTGTCT  
CTCTC

TCTCTGTCTCTGTCTGTCTCTCTCTGTCTCTGTCTGTCTATCTCTCTCTCTCTGTCT

>NM\_001008700-Mouse-129DBTSS:NM\_010557chr7+113024770113025470mchr7\_00779

tttgcgtggttctaggatagatcttgactctcagccttgcggccatctcatcaacccttaagcaagttcctaac  
agatccatgcctcagcttctcatctgaaaggatagttgcgatgactcctcttgtagtagcagcaagttcctgc  
ctgaacctagcaggagacactcgtcttaattgatgagttgtttgcttctggcacagacgctgagtaaacattgggaa  
aatgagcaacagcccgaacacaagccaagctggtctgtagggaaaggcaagattcaggtcccagctgtgggactt



aaaagctggagctctggacagctgcgagcgtggggggtggggcatgcaaataagccagcgatcaggcaaatccggagga  
ctgCGGgtgaaaatgagctgggtgaggggCGggggcatgtaaataagcgtgcacgggggtggggcgtcgcagtgaaataag  
gacaccagcgcgtaggaaGCGGGGCGAGGTCCTTCTCGCAGGAAAGCCCCGCGGCGCGTGGAGCCTGAACTCGC  
AG  
GTAGGAACGGGCGGTGGGGAAGCCTGGGACCGGGCAGTGGTGGCTACAGAACCGATCTGGCCTGAAACCAGA  
GCCCCG  
GAACCTGGGGTGGGCATGGGGCTGCTGGGCTCCTCGCTCAGCCAGGGTCGGCTGCCTTCG

>NM\_001008700-Mouse-130mchr7\_P011133chr7+113036695113037395mchr7\_00779  
tgagtctgtgacctctgacagtaaggattgggcttctggaagtcaggggctccacatgagaacaaatcaaatccc  
agggccacctatacagctgtgcaacctcggcaagtcaactccctgctccttgccctcatctgaaaatgagg  
gaactgactgtacctcatgataaagctgggtaagtgggtgggaagggacagagggagagatgatcagaagaaaacttag  
catggcgtaataagcagtgtagtgaggattgccagaggcgagggctcctcgggacatcaggccaccagagtgtctcc  
aagagatgcacaggtcacttggcgatgtacccctggtcctggggctcggattctgttaataggaccatgaagacc  
actgttctaacaattgtcctgcatcagccacctctctcctcctcctccctccccctccccctccctctctct  
ctctctctctctctCTCTCTCTCTCTCTCTCTTCTTAGTCTAGAATAGAGTTTATTAAGGGCATGGGGAAG  
GAAGCTAAGAAGGTAGTAGAGGCAGAGAGAGAGAAGAGAGAAGTAGAGGGGTAGAGGCAGGCCATGAGCA  
CATGAAGA  
GAGAGGGGAAGGGAATGGGGAGAGGGGAAGGGGTGAGGGGACAGAGTGGGAGCAAGAAG

>NM\_001008700-Mouse-131mchr7\_P011136chr7+113048210113048910mchr7\_00779  
cttgggtcatagtttgtggggtttgtgagaaatgtgatagtactcggctggtggcaatcaatcccctctctgccc  
ccccccccacacaattgcttctctctctcctgcccgaaggggggagaagggggcaatcatgggtggtgagtctcc  
attctgcagcaagaacaggtaagtgttgatttaagagtcagaaccacatctataacaccaatcaatacaggggtg  
attcgtgtgggattctaaaggaatagtttttaaatgtggcaaaacttaacctcagctttactctgaggcact  
ggaaaactgtctagacaagctgctgcttctctgctgaagcacagagtaaagaagaagacagactcccgaaggctgccc  
ccaaccaagtctccagagtctggaagggcaggctggtgtccatggaggtcagcaggacctctctggccagagaa  
tgttagtgcagtggtgcGCTGTATGGAGCTGTTTGAAGCCCCAGTACAGAATGTGGAGGAGGAAGAAGATGAGAT  
AG  
TCAAAGAGGACCTGAGCATGTCACCTGAGAACAGCGGAGGCTGCGGCTTCCAGGAGAGCCAGGCAGACATCAT  
GGCTCGG  
CTCACTGAGAACCTGTTTTCCGACTTGTGAGGCTGAGAATGGGGCCTTGGCCAGTCA

>NM\_008433-Mouse-132mchr7\_P001024chr7+1311424313114943mchr7\_00139  
ttgtagtcacacaagaggcactcagttcgttaggaggatattcctcgggaagtgggccaagaactagccattagag  
ttggagaagtgagagaaggtggagagaagacttgccggttcccgctgctcctccccagccccgccccgtacagct  
atctctactctactttccagggccagggcgtctccgatctatctcggggcgaggccgggtgtgccaactgctgcc  
cgcacctgacctctctgtgctgctcctcctctcagctgtcatgactgacaacgggctcgggactggcgctggc  
gctgacccggcggcaggtggcgagatcctgctggagctgtggtgtgCGggggtgacccgggtgcccctacggagccgg  
actgcacctggcgggggagggccaccagcgcagccctggccgggttctcggggaaggcgaggcgttgctgctccctg  
gccatgctcctgctctctCCTGGTGGCCGCGCGGTGCTGCTGCGCAGCGGGTCTGTCAACCGCTCCTACCGCAG  
CATCGGGCGCTCAACCAAGTCCGCTTCCGCCACTGGTTTCGTGGCCAAGCTGTACATGAACACGCACCCGGGTC  
GCCTGC  
TGCTGGGCTCAGCTGGGTCTCTGGCTCACCACAGCTTGGGTGCTGTCTGTGCGCTGAG

>NM\_175174-Mouse-133mchr5\_P90020chr5+6376717263767872mchr5\_00113  
ggagtgtccaccgcttcattctattaccccttgtctcctcatagctgatattgggatgaaagtaaatggag  
atataatgtgaacgattgtttctttaaagctattttgggtacagcagggaatataactctctctgttggtgg  
atacaaaatctgtgcgcggtgttttggcctgctagacatcactcggttctctgaggatgtcgtggtctcgc  
aagagttgacgtgaaacagatttgaanaacaggtggaggtgttgccatcaagcatcgtctaactcttccgtgac  
agccagcagggagaatgtgaaccgagggacagccgggcaaacgggtgggagaaagtgttagatccgtgtaacctaca  
attgcttggctcattgtgtaccgaaggtccagcaactggttccagaattcacctcttgccaatggcatcca

cctcagatgtccctgcatttGAGTTTACAGCAGAAGGCTGTGCTGGTGCACACTGGCTGGAGAGACCAGAAGTGGACGA  
T  
GGCACTAGTGAAGAGGAAAATGAATCTGATTCCAGCTCGAGCAGGTTGATTATTCTTACTGTCAGAGACGG  
GGTGCGG  
GGTGTGTGCTCTATGCTAGTGGAGAATAACTGACTATTTACTAGCTTATCTCTGTGGTTG

>NM\_008491-Mouse-134MM24P3GEN\_1chr2-3234756132348261mchr2\_00133  
tccctgtctaaaacattcactctcagcttgcaccctccccagacaaggaagctgcacagggtctgggttcagatgg  
ctttggcttacagcaggtgtgggtgtgggtaggagcaggggtaggggtggggaagcctgtactatactactatcc  
tgtttctgacctctaggactcctacaggggtatgggagtggacaggcagctccagatctgagctgctgaccacaagcag  
tgccctgtgctgccagaatcaaagccctgggaatgtccctctggctccccctgtccctgcagccctctgttgc  
caaccttgacagttccgacctggggagagagggacagaaatctgccaagtattcaacagaatgtactggcaattac  
ttcatggcttctggacttgtaaggtggactacccgcccaacagggggctggcagccaggtaggccataaaaag  
cccgtggggagtctctcACTCTCTGCTCTTCTCTCCAGCACACATCAGACCTAGTAGCTGTGGAAACCATGGCC  
C  
TGAGTGTGTCATGTGTCTGGGCCTTGCCCTGCTTGGGGTCTGCAGAGCCAGGCCAGGACTCAACTCAGAACTT  
GATCCCT  
GCCCCATCTCTGCTCACTGTCCCCCTGCAGCCAGACTTCCGGAGCGATCAGGTAGGACCC

>NM\_008491-Mouse-135mchr2\_P033152chr2-3234868232349382mchr2\_00133  
gagtgacaggctctggggccacatcatccccacagcttgcttagcttacttctgctctttcatcatatagggacct  
gaggggacagattctagtgttagtctctctggtatgggggagagagaaggctacatcctaggtgtgggtgtgtgagg  
ctgtagcctactatcagcttaaggtcccccttaagcttccctgtgactaacctcccagagctaggcagcagtgagg  
agggagaggtcaggagcagaaacaggtaaatcaatggccccttggctctgcccagggccagaggacttcagccagct  
tcaggtcagatgttcagaagcagatcctgagtagggccacctggggggcgggaaacggcacagatagcatctgggatcca  
tcactacctcaattgatgtcggccaggccccagtgaggaggaaaggcttctccaggactaagctcgaatcaactgg  
gggagggagagccctgaagcCGGGCCACTAGGTTCCCTGCTCAAGGTTATGGCCAGGGACAGAGGGATGCCTTCTC  
AAG  
GGAGGATGACTTAAGGAGAAGGTAGAACTTGTCTGCCCCAAAGTAACTGGAGTACACAGGGCAGTGTGGA  
GACACACC  
CACTTTCCTCAAGGGCTCTGCTCCCCAAGTGATCCCTTATCCTCCGTGCTAAGATGA

>NM\_008491-Mouse-136mchr2\_P033154chr2-3234592132346621mchr2\_00133  
gagaactgtgcttaattggagcaagggagagtggaaagaatagtgaaggagagggcaggcagtcagtgagggtgtg  
tgggggatggaggggtgctgctgagaggagaccagggccaccactgcatatgataactgctctggcagataggtgg  
gctggagttggagcaaaatatctgaggagcaagggcaggtgaatggcaggttgggggtgggggctcagctattgtgg  
caggggattgaacgggacttagggaaattcacatttggttaaagggtggggcatagtcttaactgtagtaggctg  
gctgctcaggattaaccaagagaggccgtagagatggagcagagaaagaatggggagaaaggtcttagcaggaccaggca  
gggcagactcaaaaggcctaggtgcatctaagatgggtggcggggcctcctgcccaggttgggtggcaggctattatggg  
ttggaggaacaggggtgggcGACATCAGAATGCTAGTCCCACCTGCTCTAGTCCAAAGGACACTCCAGCCTATGTCAT  
AT  
CCCTGTTCACTCTCATCTCTCTCCACAGGGACCAGGACCAGGGCTGTCGCTACTGGATCAGAACATTTGTTCC  
AAGCTC  
CAGGGCTGGCCAGTTCCTCTGGGAAATATGCACAGTGAGTCCTGAATCCGGTGGGGTCC

>NM\_008879-Mouse-137DBTSS:NM\_008879chr14+6693850866939208mchr14\_00315  
caaatggggtgagagagagagggaggtgggataggcatgttccccatgaaatcccttacagttgtacatcacacctc  
ttccttgttggcttactggagatgaagaattgttttccagatgaaagatgtaggtcctgggtttgctttaaag  
caactagagtcagacaaaagagttcagccaggaagctgacctcctcctatctgtgatcagaagggttaagtagccc  
aggcctgcagagagagaccaggggtgggaagcagaatgctcctagagaggaggaagtggaaaggtggctctagattca  
ctgtgacctgtgtcaggtgatttcagggggaggagacattaaaaaaatgttgagtaaaatgtcctataaagacaaa  
atctatttcttctgctggtgattgccactgcagttacttctgctgtgaccacacagccctgcttgaaggt

gctctgtagatctgaaggacTGGGGTTTCTGACCACACAGCAGTGCTGCTGACACAGAGGACAGTTTCTCTACCAGGT  
AA  
ACGTGTTTCTCGTCCCTTTGCTCGCTGGAAGTGTTTGGGACCTGGCTGGGGCTCTGCTGCTGGGTGCTGTGGGT  
TTTGTC  
TAGAAGGGGCTAAGCACCTGTCTTCTCAGCCCTGTGTGTCTTGCCTCCCTCTAACAGAGA

>NM\_008879-Mouse-138MMU82611\_2chr14+6693844066939140mchr14\_00315  
agagagatcgtttgtttcgtttatatacagatatgatcatcattgagagagtgggagagggattggttcaaatgggggtga  
gagagagagggaggtgggatagcatgttcgcccataaaatcccttacagttgtacatcacacctcttcttgtgt  
ttcactggagatgaagaattgtttttccagatgaaagatgtaggctcctgggtttgctttaagcaactagagtca  
gacaaaagagttcagccaggaagctgacctcgcctatctgtgatcagaagggcctaagtagcccagggcctgcaga  
gagagaccaggggtgggaagcagaatgctcctagagaggaggaagtgaaggtggctctagattcactgtgacctgtt  
gtcaggtgatttcaaggggagagacattaaaaaaatgttgagtaaaatgtccttataaagacaaaatctatttctt  
cctgcctgggtgattgccacTGCAGTTACTTCTGCCTTGTGACCACACAGCCCTGCTTGACAAGGCTGCTCTGTAGAT  
C  
TGAAGGACTGGGGTTTCTGACCACACAGCAGTGCTGCTGACACAGAGGACAGTTTCTCTACCAGGTAAACGTG  
TTTCTCG  
TCCCTTTGCTCGCTGGAAGTGTTTGGGACCTGGCTGGGGCTCTGCTGCTGGGTGCTGTGG

>NM\_008879-Mouse-139mchr14\_P005863chr14+6689302066893720mchr14\_00315  
cccaagccctgtacagccgaattacgctcatagtaaggaccaccaactagtccccgcccccaacttccccacccc  
ccgacccgcacacccccccccagctagcccgtaagaagcgcagggcgcagaggggtgggacgctcgggaactagg  
ggcggggcattgagccccccatctgcccccccactcgatcccccactgatttccaccttagccagtgggccct  
aattctgtcgcgggcagcgcaggatgcccgaggctgaagtgggtggagccgggaggagtggtccacgtgtagctgtagc  
gaaggctgtgggtgacaatcgttattactattcttactcttaaaacagtgggcactattatttacttacttttccatga  
cttgacaccgggtgtctggagactgggttggcatttttaataacggctacacttttggcagctggccaccgttactcatt  
ttgagtaaaaccctgtctCCAAATCGCACGTTCTGTTTTCTTCTTGTCTCTTGGGTGCAACCTGGTTTTGTCTTTCTG  
TTTTTAAAGTTCTTGGTGGAAGTGAACTGTGTGGGAACCGAGAGCTGTAAGGCAGTGAGTGGTTCCAAAGC  
TCTTTAAA  
AGGACACCCAGGTCTCACTGTCACGGTGGTTGGCTGTGATTACCGGTGTTGGTGCTGTCT

>NM\_008879-Mouse-140mchr14\_P90068chr14+6689805566898755mchr14\_00315  
ttttattcagctccaagtccatactggattcaacgcattaagagatcacttctgaggatttgaatgggggtgatc  
actttacaaggtgttactggggagaagaaaacctctctacttctcaggtgggggtttgtagtgcatacttggggg  
cgcttgatgtctcagtgaaactacaaatgtataaagaataaaataacacagacagggactgatgacctgttatt  
ggaaaaggccgagagctatatcctgaagcaacagaaagtagaacgagggggttaatgtccagctctgcttagtagaaat  
attagttagggacaagaaggaccggtttactattctgtactgtgagctattgtgatctaaagccattcctaaggac  
ttggcacgtctcagaacatgtgttcccttgcttatgtctatttcaaaggggaaagagttctctgggagaggtatctta  
tgtaatgcacagagacattaGCCTGATGGGGCTTTGAAAGCTTCAAGAGCCTCCTCCTATGGCGGAGGCTGGGATTTG  
TA  
AACAAGCTGTCCATAGGCTGTGGCTAAAGGAATAAGGAACTTGAAGGGAAAGGGCTCCAGAGGAAGTAGAC  
AGGAGGCC  
GGAATAATAGACTTCTCTCAAGTGACCTCCACCCCGCAGAAAACAAATGTGCAAAGATCAA

>NM\_010728-Mouse-141DBTSS:NM\_010728chr18-5300987053010570mchr18\_00001  
gtttctctagacctgtaaaaggagatagagttaaaagaagaagaaaaaaacaccctatataatttggatagac  
aaaagaattataaggagaacaggaagagattggttataattatctctcatctgaaataggctgcacatatgcccata  
gcagtttatctccagaagggcatggctgggatggttattacgtgaccacaggttctgggggaagacatctgctatgga  
ggtcgacacagaggataagaacgaagcagatcctatcgggaggggagaaagttcgtctgtaactcagttactgacctt  
tgtttaccagtgcatggtacttgggaaggggaggggaggggagcgtggaggagctgtcccgccttgacgtttccaatc  
acattacgtgaacaaatagcggaggggaggggaggggaggggagcggctgtgtaactgcaaaactggtcagaaagttaaaat  
ctctctctcttctactCAGACTCTGTGCGCTTTCCAGACCTTCGTGCGCAGCTCCCCGTGCGCTTCCAGGGCTGG

GAAAGGGGAGAGGAGGACCGTGCCACGTCCGACGGCAGCCTGGGCTGGGGGCAGGGTCTGCTGTTCCGCCCTGG  
CACGACT  
CCCTGCGACCCATCCCCGCGCCTCGCCCTTCTCCTCCCTGCTCGGAGAGGTCTCCCTCCT

>NM\_010728-Mouse-142MUSLYSOX01\_1chr18-5300992853010628mchr18\_00001  
aagtaacactagttgtcatcttactggatctaccaggcttacaattaactactgggtttctctagacctggtaaagg  
agatagagttaaaaagaagaaagaaaaaaacaccacgtatataattggatagacaaaagaaattataaggagaac  
aggaagagattggtataattatctctcatctgaaataggctgcacatatgcccagagcagttatctccagaaggc  
atggctgggatggttattacgtgaccacaggtttctggggaagacatctgctatggaggctgacacagaggataagaac  
gaagcagatcctatcgggaggggagaaagttcgtcctgaatctcagttaactgaccttggttaccagtgcaggtactt  
ggggaaggggaggggagggcagcgtggaggagctgcccgccttgacgtttccaatcacattacgtgaacaaatagcgg  
agggcagcggggccagaacGGCTTGTGTAACCTGCAAACCTGGTCAGAAAGTTTAAAATCTCTCCTCCTTCTACT  
CCA  
GACTCTGTGCGCTTCCAGACCTTCGTGCGCAGCTCCCCGTCGCTTCCAGGGCTGGGAAAGGGGAGAGGAGG  
ACCGTG  
CCACGTCCGACGGCAGCCTGGGCTGGGGGCAGGGTCTGCTGTTCCGCCCTGGCAGACTCC

>NM\_010734-Mouse-143mchr17\_P90185chr17-3368137633682076mchr17\_00121  
nnnnnnnnnnnnnnnnnnnnnnnnnnnnnnnnnnnnnnnnnnnnnnnnnnnnnnnnnnnnnnnnnnnnnnnnnn  
nn  
nnnnnnnnnnnnnnnnnnnnnnnnnnnnnnnnnnnnnnnnnnnnnnnnnnnnnnnnnnnnnnnnnnnnnnnnncagttta  
gtgagagacctgtctcaaaatagatagatggatagatagaataatgtgtagaaacagttggaaagttgatgtccaac  
atccacttaaggccctatacaacacaggcagacacacttatatagaacaaagaaagaggaaagtaagcgaacacaggt  
tcaagagataaaagaggagagactgagaaaaaaagagtgagacacagggaagacaggtgggagctgcgccagg  
ctgggaagggatgtgtgacagtaccctggctcctcatctctgactgccagggccaggtctcagggcaggagcc  
ccactatgcatctccagcAGCTGCCAGTGTCCAGTAGTGATATCACAGACATGAAAGAAGACCTCAGCACTGACTA  
TG  
CCTGCATCGCCAGGAGCACACCCACTTGAGTGCCCCAAAAGCTCTCCTCGCCCTGGGTGCGTGCTCAGTCACA  
CTATGG  
TCATCTAGTAAAGTCTGGTTCGCCACTTCTGCATCAGGCTTCTCTATATGTGTCCAGCCC

>NM\_027836-Mouse-144mchr19\_P011450chr19-1058952310590223mchr19\_00305  
agttccatccattgctgtttcacgaagccattgttttaatagccgagtagttctccattgtataaatgtaccatctt  
ctctgtatccattcggaaatggccatctaaaggtcaccacacagatagatccatccatcttcagacaccaaacttgaca  
ctagtgtgatgccaagaagcactgtctggcagaagccgggatgaccaatacagaacttgaccaatacaggtgcagata  
ttcacagccaacattggactgagcctagggacccagtggaagagctagagtaaggacagaaggagctgaaggggatcgc  
aactccatagaaagaacaatacaactaaccagactaccagcctcccaggactaaaccaccaacaaagagtataca  
tggaaggatccatggcttcagatacatatgtttagcagaggatgacctatctgacaacaatgggaagggagtagtgc  
gtccgctcttgaccagcaagAACGACACGACCAGTCTTCTAACAGCAGTTTATTCAGCAAACCTTCAGTCTTCATC  
T  
CTCTCACTTCAACTTTATCTCTCATCTTTCTCTCTTGAACCCCGGGCTCTCACTCTTATATACTCTCAGCCCC  
ATCCA  
CTCACAGCAGGCCACATCACCTCACAGGCATGCAGCTTTCAGCTAATCAGGGCAGCAGGG

>NM\_027836-Mouse-145mchr19\_P90142chr19-1058485010585550mchr19\_00305  
ttcagtgccattcattcatgcttgaccacccatgacaatccactaaacaactgctcttaccacccctcccc  
accattttacttttcaaaaactgagtagtaggggtacctcataagtagaaccacgcagcatctgacttcttgactc  
atttaagattttgttttgaggtttaacaatgtttgcagcatgtcagaatataacgtttgcttttataacttaaggctat  
tgtaattagtcaaagattgataagaattcaaatggttggaatgaccattgtacagttataattgtgtaaaatctt  
acataaagaggagagagaactgaagagaggagaaaggaacacaaagaagaatgaaactgggacttcgtattattgtt  
ggggagtcaggaacatttgattcatgcaaaactatattcttttagctgacattggttataatgtcttttaacaaa

tggtaattttaaataacaGAAATAAATGCACATGATGTTAACAGGCTAGAGAGCATCAAATTGGCATCCAGCTCC  
TA  
ACAGGGAGCTTAGAAAAAGCATGCAATATAGTTCTTAGATATGAGACCTGGCAAATCCAAGAAAGAAATGA  
GAACCTGA  
AGGGGATTGTGTTGATATACTTAGCAACAAAGATCAATTCGAAATCCAGGTTTCTCCATA

>NM\_008685-Mouse-146AF127136\_1chr15-103736358103737058mchr15\_00460  
aaaagaggacagaaggagagccaaagtgatattgccagaagagaaaaggcctgagacactatgggaacttgctaag  
gtaaattgcttagtgaggctgggttgtagatgtagcactttgggaaccaaggagcttagaatgcagcaatggatg  
gatcaggtccaactgccatctattcagatctgctgtaggatctgctttacagggtcttgtgaagcccagcctaa  
tatgctttaaaatgcataaaagtctgacaagtctgcttaaatctttgttagtgcttgacctggaagagagaggag  
ccctggttatgctgggtgggacatgaccaaagaccttgggataaagggtaaagggtccagtgtctctggagccat  
tcctcctgctctgctgctgagctgataaaccttctggcccaggcaggggaacctaaagtaaggatgggagg  
agagggaaaggttgctatcaCCGGCAGGCTTGGGGCCTATCTCAGAGAAGGGGAGGGGCTGTCTGACTAACACTTCCC  
AC  
AACACACTCCTTGAGGATCTCTAAGCACTCACTTCTTGGGAAGAAAGGGCTGAAATACTAGGTGTGGTGGTAC  
ATGCCTT  
TAATTCAGCACTTGGGAGGCAGAGGCAGTCGGATCTCTGTGAGCTAGAAGCCAGCCTGG

>NM\_008685-Mouse-147AF128459\_2chr15-103740035103740735mchr15\_00460  
ataaataaataaataaataataggacaaaaagaatcctttgcttagagcatctgaggcaggggtggcgggtaact  
cattaaaggataccttaagcagctagcagcctctcatcccaaaatagttcccttagagcccaggcttctagaagtga  
aggttgctgcctaagcaaatggactcagatacctggttctactgctgctgctttgcttattgacttagttt  
ccctgctggtctttaggagacaccacctgaaagaaaggaggctgcccgtatgtttatgacttaggtctctg  
tgagtggaccatcactgtaagtcagcccgaacaaacaggggaatgaactgtcctggaccagctggagagggtctgaagc  
ctgtgagccccgggtgccccgctgccacagagagggggggcgggtgagcagaaaccacaccgggctcaagtttct  
ctcttgccagaaggggcagGAGGAGAAGAGGGCCACGGGGAAAGGGAAGGGTTGGAGGAAGCACTGGTAACTCCGA  
CCG  
AGGGCTTCGGAGAGACCCCGGTGCGCCCGTCTACCGGGGCCAACCGGTGCTCCGCGCCAGCCATGGCCCC  
GGGGCG  
GGGCTCGGCCCTCAGTAGTACTCAGAGGCAGCGCTCAGCGCCAGGAGGTGTCAGCTCTG

>NM\_008685-Mouse-148mchr15\_P009737chr15-103745519103746219mchr15\_00460  
caactctatttaaaggcaagttataggagctgaagagatcactcagcagctagtgtgagactgctcttataaaagac  
cctagttgaaagctggacatagtgatgcacacctttaatccggccttcaggaggcagaggcagggagatctctgatt  
caaggccagatagggtacacagagaaactctgtctcaaaacagaaaaataaaacaaacaaacaaacaaaccccttaa  
accctaattggatttccagaatcttcaagttgctcagaaccacttgaactccagctccggaatattcgacatct  
ctggcatctatgggactagcacacacatgaacacaccacacaaaggcctacacacaaacacacacacacacacaca  
cacacacatacacacacaaaactaaaaataaaaaataaacctttaaataaagattacatatcaaatcactgaa  
ttaaactagtgagtggtGTGTATGTGTAAGAGAGAGAGGGAGAGAGAGACAGAGAAAGACAGAGAGAGCGACACA  
GA  
GAGAGAGAGAGAGAAAGAGAGAGAGAGAGAGAGAGAACACACTCAGCCTAGGCTTGTATCCATTCTATAGTC  
AAAAAGAC  
AAATGAATATATATCTGCCTAATGTGAAAAAGCCAGAAAATGTGTTATGGAAGTATAGCT

>NM\_008690-Mouse-149DBTSS:NM\_008690chr17+4371239943713099mchr17\_00300  
tgtcctgacttctttgataatggattatgatcttgaagtataagccgaataaaaccttctccccatttgcttttg  
gtcagggatttcttgcagcaatagaaacgtaagacacccaccaccaccacactacacaaactcccccaaaagt  
agccggttatgcagaaaagtttttaaaatacacttttaacaattgaatgaataaatgaatgaagacaccagga  
ctaaaagaaggaaacaaacaaatgcacggaattagtgatgaataaaaggggaagggaagatgagtgatgaatgaat  
ggcgaaacaaatccacgcaggagtgagcaagactgtaaccagagactcctgctctacgcaagcagcaaacaggggat  
tccggagggggcgggctctaccggaagctccttgagggcggggctgtggcggtggcagtggtgctgggcaacttctg

ggtccggggggcggggcgacaGAGAAGACCTAACTAGGGACCGTTCAGCTGCCCAAAGCACCCGCTGCGGTGGACCTG  
GCC  
GGCGCCCTGGACCTCTCGCTTTTCTCATCCGCTCCCCGCGCTGCACAGGCAGGTAATGAAGCCGCTCGGAGAG  
TGACTC  
TGGTTCTGTTAGGCGGTACACAAAACCCGAAAAGCTCGCTTTTGCACACCTCAGAGTTA

>NM\_008690-Mouse-150mchr17\_P005647chr17+4370660843707308mchr17\_00300  
nnnnnnnnnnnnnnnnnnnnnnnnnnnnnnnnnnnnnnnnnnnnnnnnnnnnnnnnnnnnnnnnnnnnnnnnnnnnngcgtggtcctgaggagggggcgga  
ggggcgggggcctctctgtctccccaccccccgggggggagggggcctagaaggggcacgggggaggctggagatgggg  
ggatgggtgggagggcggactgaaggggcggggtggggggcgggggcgggggcggggtgtcaccttgaggccctcgcg  
gcgccgtccgctcccggcctcccggcgcctttgtctgagccgagctggagccagcgcgcccccttctct  
cccagtgcacagagccccgccccagccccaaactccgctccccaaagccttctaataaccaccaccaccacacc  
gctaaaggggagaagcaacaggggctccccgaccctttgtctctcgccctgttcaccgcatcttcttcgctgctg  
cccttctgggaagatctcagCCTCAACTCCTCTCCAGCTGTCTCTTAGAAGGGCCCTGGCGAGCGGGAGGATCAAGCA  
G  
CGTCCGTCTCCCATCTCTGGTCCCACAAGTCCTTGAAGCTGAAGGCTGGGGAGAAGAGAATGAGTCTGGACAT  
TTTAGGG  
AAGACCCTTATTCTAATTTGTATGGTAAAGGGTTAAGGCAGAAGCCGGACTCTAGAGGC

>NM\_020272-Mouse-151DBTSS:NM\_020272chr12-2719646627197166mchr12\_00203  
attcaagagtgagaaatagtaaggcaaacaccgttctctgtccgctctgtctgtgtgcttcagcaggaaatgc  
atttctgacacttttaaatgagcaatcacatgtataatcaactggtaaaacttctctctgtaactgcaacacttc  
ctctgcatctggatatgaaggagccccagaaaagaggaagagacgagggtccccgggtaggtctagattcgttttttt  
tttttttctaaagtaacaaatgatcctcctccgcatcactccagggctgctcaggtacgactgctttctgtgtt  
tgctcttgcttggtatgacttggaaacagtaacaccttctctcagctagaatcttttgtctggatccattgcccgtt  
caagctgagccaacccccgagcgtctgagtttcttctctcggcgcttagactgtgtacatccacaagttcccgtcca  
gcaagggcttgagggtgacTAGTTCTTTCTGTTTTTGTGGTGGCGAAAGGGGCGGCCACAGAGCCCGTGACGGACA  
GG  
CTCCAGAGTCGACCAAGTGCTTGCTTGGGAATTCTGTCCAGACAGTGTTTTTTGTAAAGAGGACAAAGCTACTTA  
GTCCCAG  
CCATGAGGAAACCCAGTGAGTATTTGGTCAGCCTTTTCTCTTCTGTACCTTGTATCGTGC

>NM\_020272-Mouse-152mchr12\_P015484chr12-2719413527194835mchr12\_00203  
ggtaatgcttatatgggaggttaggtatgaactctgaccttatgttgtaggaagcactttatccactgagccatct  
ctccaggccatggtgcattaaatgaaacatcacacacacacacacacacacacacacacacacacacacacacaca  
cacaactaaagaaacgggtgcagcatggttttttaaaagctgcgctgcttatttaactttacctccatcttctat  
ttgtaataatcaatttacataaaaaatcaggctcggatattaggtaggctacatcactcaaacagtaagtagctggc  
agggattcatgctgaccagcgtgctaaagtgcgctgctccatcttcttggtccctccaggccttgctgcaca  
tcagcccaccacacttctctgcatcatacaggaatgtgcaggaagcagtgctcttgacaaagctctgtttctcca  
ctccaggtcgcatagggcaTGGAGCTGGAGAACTATGAACAACCGGTGGTTCTAAGAGAGGACAACCTCCGCCGGCG  
CC  
GGAGGATGAAGCCACGCAGCGCAGCAGGCAGCCTGTCTTCCATGGAGCTCATCCCCATTGAGTTTGGTACTGCCC  
ACCAGC  
CAGCGCATCAGCAAGACTCCAGAAACAGCGCTGCTGCATGTGGCTGGCCATGGCAATGTG

>NM\_139200-Mouse-153mchr2\_P031344chr2-5811694858117648mchr2\_01124  
ataatgtaccaagccagaatgaaacaaatcaattgtgagaatcttccatgtccatgtgaacgactagatttt  
ctaaatttttttttttttttttttttttttttttttttttttttttttttttttttttttttttttttttttttt  
agcatgtccaaacctcagaatctcactgtgagattggcaggagtaggatctgtcctctccccaccaccaccctaac  
ccccaaacctactccatactgcatgtcttggtgcatgtagccctgtgcaggggtgggggtgagcccttgctcaca  
gaggaagtcaacttagctggtaactctttacccttataaggtcatatccagcagcactggaattctctctcatgca  
agtgaggcattcccagccccaacccagccaatgatggccactcatgctgagagccctattcaccacaaaggcttaa

gtagctcctctctaacaacTGAAACAGTTCTTCAAAGCTGTTGGTTCCTGCACACTCACCCTGAAGACCAAGATCC  
T  
GCCTGCACCCACCTGCCTGGCCATGCTTCCCTCCAGTCCAGCCTGCTGTGCAATGAGCCTGGTTGCCAG  
AGGGGG  
AAGCAGACATGGGGTGACAAGGAGGAGTGCAGAAATGTTACAAGAACTGGCTCTAACAGT

>NM\_139200-Mouse-154mchr2\_P90440chr2-5811322658113926mchr2\_01124  
acaaggactttaccagagaacaacctggccagcacctgtgacatttacagccaaaagagtgagtgagggcacagtctgtt  
aagtgcacgggggtgctaataataaatgagcaaacgggttaggaagcaaatgagcgaactgaacaaagttgtttctttt  
ctttcttctctggaaaattctgttttagtaccgtagccatagagtatcaactctatgttccggctgtttgaggga  
ggaaaagtacactgattttttcttttttttttaattgtagaaaaggaacgcaaggttctctcaggagc  
actggagagtaggagtgacctcctataggctttgtgcaacagtgtctcaaacacagcagtcacatgggtctgttgg  
ctttgctacttttctgactgctgctcagagggctgtgcatctcctcctcctgcaaggccagggaaccatgtgtt  
ggcgggattaactttgcccACAATGTCTCTGCAAAGGTTTCTGCAGCGGCAGGCAGCAATGGCAATTTGGAGTACT  
GT  
GCTGACTCTGCCTACGGCTCCTACTCCGTCTCACGGGCCAGCTCACGATGGAAGACAACCGAAGGATTCAAGT  
GCTGGC  
AGACACTGTAGCTACTTTGCCCGGGGACGAAAGCAGGTAAGGTTGCTGCGCTGTCTAGA

>NM\_011210-Mouse-155DBTSS:NM\_011210chr1-138064318138065018mchr1\_00432  
gtagtttgcataggaagccacatcaccgaggaataggcatacatttgagtctgagctcctatggtaaataacagg  
agttggcagacataagcagaagacagttggttgggtcacttggctcgtctcaacgaactcagagcctcgaccagct  
tagtactgtgttattcttccaacccctatggttatactcatgtggaagcttgcataatctgggtaagaaaattatt  
gatgacttgggaggatgtattgtttgaataaagcttcttaaaaagatattaaaaaggagcaatattatagttt  
aaaactgtttctttagaggaatgagacgaaccgtaacagcataaacttgaattaaggaagtaagaagccatt  
gcactgactttgaacgaccttttttttttttaacttctgcaagaggaccctttacagtattttggagaagtt  
agtaaaaccgaatctgacatCACCATTTAGCAGTGCATGTAGCTAGCAAGTGGTTTTGTTCTTAGGGTAAGAGAGTAGG  
AA  
ACTTGCTCCCATCTGATAAGACAGAGTGCAAAGTATGCGTCTTTTCTTTTAGTTTTGACTTAGCTTTACAG  
AGACAAA  
CTTCAAGAGAGATAACCATTATTTTGCCTTTCAGGGAGACCCTATTTCTTAGGGGCACAG

>NM\_011210-Mouse-156MUSLCA01\_1chr1-138064233138064933mchr1\_00432  
gcagacataagcagaaagacagttggttgggtcacttggctcgttcaacgaactcagagcctcgtaccagcttagtc  
actgtgttattcttccaacccctatgtgttatactcatgtggaagcttgcataatctgggtaagaaaattattgatga  
cttgggagggatgtattgtttgaataaagcttcttaaaaagatattaaaaaggagcaatattatagtttaaac  
tgtttcctttagaggaatgagacgaaccgtaacagcataaacttgaattaaggaagtaagaagccattgcact  
gactttgaacgaccttttttttttttaacttctgcaagaggaccctttacagtattttggagaagttagtaa  
aacccaatctgacatcaccatttagcagtgatgtagcaagtggttctttaggtaagagagtaggaaacttg  
ctcccatctgataagacagAGTGCAAAGTATGCGTCTTTTCTTTTAGTTTTGACTTAGCTTTACAGAGACAACTT  
CA  
AGAGAGATAACCATTATTTTGCCTTTCAGGGAGACCCTATTTCTTAGGGGCACAGCTGATCTCCAGATATGAC  
CATGGGT  
TTGTGGCTCAAACCTTCTGGCCTTTGGATTGTCCTTCTGGACACAGAAGTCTTTGTCACA

>NM\_011210-Mouse-157MUSLCA3A1\_1chr1-138064683138065383mchr1\_00432  
atgaatctgtgtattggacatagagggttctgggaaaagagagagtgggggaaataatgcaattcaatatacatg  
tgaaattgatcaggagatgtgtgtgggtggggaatactatgatcaaaagaacaagttaactttgtaaagacaag  
gcttggtttcttctctctcattggtaaatagcagagcaaccccaatgtaggggcactcctgtcttgaagca  
gaattcactgatgcagagagagatctcactccaccactcaaggagatctgcataaaactcaatgaaccaccacca  
gcagccctgaaaaacaattgggaggtctttaaagccagtgaaggtagtttgcataaggaaagccatcaccaggaa  
ataggcatacatttgagctgagctcctttagtaataacaggagttggcagacataagcagaaagacagttgtttg

ggctacttggctgcttcaaCGAACTTCAGAGCCTCGTACCAGCTTAGTCACTGTGTTATCTTGCCAACCCCTATGTTG  
T  
TATACTCATGTGGAAGCTTGTTCATATCTTGGGTAAGAAAATTATTGATGACTTGGGAGGGATGTATTGTTTT  
TGAATAAA  
GCTTCCTTAAAAAGATATTA AAAAGGAGCAATATTTATATAGTTTAAAACTGTTTTCCCTT

>NM\_011210-Mouse-158MUSLCA3A1\_2chr1-138064323138065023mchr1\_00432  
tgaaggtagtttgcataaggaaagccacatcaccgaggaaataggcatacatttgagtctgagctcctatggtaaata  
acaggagttggcagacataagcagaaagacagttggttgggtcacttggctgcttcaacgaactcagagcctctgac  
cagcttagtactgtgtatcttgccaaccctatgtgtatactcatgtggaagctgtcatatcttggtgaagaaaa  
ttattgatgacttgggagggatgtattgttttgaataaagcttcttaaaaagataataaaaaggagcaatattat  
agtttaaaactgtttccttagaggaaaattgagacgaaccgtaacagcataaattactgaattaaggaagtaagaag  
ccattgactgacttgaacgaccttttttttttaacttctgcaaagaggacctttacagtattttggag  
aagttagtaaaaccgaatctGACATCACCATTTAGCAGTGCATGTAGCTAGCAAGTGGTTTGTCTTAGGGTAAGAGA  
GT  
AGGAAACTTGCTCCCCATCTGATAAGACAGAGTGCAAAGTATGCGTTCTTTCTTTTAGTTTTGACTTAGCTT  
TACAGAG  
ACAAACTTCAAGAGAGATAACCATTATTTTGCCTTTCAGGGAGACCCTATTTCTTAGGGG

>NM\_011210-Mouse-159MUSLCA3A1\_4chr1-138064316138065016mchr1\_00432  
agtttgcataaggaaagccacatcaccgaggaaataggcatacatttgagtctgagctcctatggtaaataacaggag  
ttggcagacataagcagaaagacagttggttgggtcacttggctgcttcaacgaactcagagcctctgaccagctta  
gtcactgtgtatcttgccaaccctatgtgtatactcatgtggaagctgtcatatcttggtgaagaaaaattattga  
tgacttgggagggatgtattgttttgaataaagcttcttaaaaagataataaaaaggagcaatatttatagtttaa  
aactgttttcttagaggaaaattgagacgaaccgtaacagcataaattactgaattaaggaagtaagaagccattgc  
actgacttgaacgaccttttttttttaacttctgcaaagaggacctttacagtattttggagaagttg  
taaaaccgaatctgacatcaCCATTTAGCAGTGCATGTAGCTAGCAAGTGGTTTGTCTTAGGGTAAGAGAGTAGGAA  
AC  
TTGCTCCCCATCTGATAAGACAGAGTGCAAAGTATGCGTTCTTTCTTTTAGTTTTGACTTAGCTTTACAGAG  
ACAAACT  
TCAAGAGAGATAACCATTATTTTGCCTTTCAGGGAGACCCTATTTCTTAGGGGCACAGCT

>NM\_011210-Mouse-160MUSLY5D\_1chr1-138064717138065417mchr1\_00432  
ataaaagttaaagaataaatggtatgaattaggatgaatctgtgtattggacataggagggtctggggaaaagagag  
agtgggggaaataatgcaaatcaatatacatgtgaaattgatcaggatgtgtgtgtgggtgggggaaatactatga  
tcaaaagaacaagttaactttgtaaaagacaaggcttggtttcattgctcttctttaggtaaatagcacagagca  
accccaatgtaggggcactcctgtctgaagcagaattcactgatgcacagaggagctcactccaccactcaagga  
gatactgcataaaactcaatgaaccaccaccagcagcctgaaaaaacaattgggaggctctttaaagccagtgaag  
tagtttgcataaggaaagccacatcaccgaggaaataggcatacatttgagtctgagctcctatggtaataaacagga  
gttggcagacataagcagaaAGACAGTTGGTTTGGGTCACTTGGTTCGTCTTCAACGAACCTCAGAGCCTCGTACCAGC  
TT  
AGTCACTGTGTTATCTTGCCAACCCCTATGTTGTTATACTCATGTGGAAGCTTGTTCATATCTTGGGTAAGAAA  
ATTATTG  
ATGACTTGGGAGGGATGTATTGTTTTTGAATAAAGCTTCCTTAAAAAGATATTA AAAAGG

>NM\_018750-Mouse-161DBTSS:NM\_018750chr1-131115162131115862mchr1\_00665  
ggctctcatgatcaccgatcaccaaggatcaccagtcactcctcaatccagctctcggggaggggagctctatgtagca  
gaggtgagaaggagagagctgatgtagccagcttcccagggcagctcggagaatccgcgggccgcttactgacagcg  
gcgggctagctcctgtcccggggccacaccaggttgccaaagcctgcttcccactgctccccgccccgctgtta  
ggcgccctgggagacgcccagaggggacggggcagagctgaagacaggcgagggagcggcgctaccgagctcgcgaa  
gcctctgggtgctcggacctcaccaccgctagtcgaggctcactcctaatccacgagctccgacctccgagctcac  
gcgtgtgcccctccgctcctcggctcgggctccgccccccccgggctcggggcctttaaagcgcg



tcgaccggagccgcccttcTGTTGGCCAGGCTCGGTAGCTGCCGCCGCTGCGGGCCTTGGCCATGGCTTCCCCGGCC  
A  
TCGGGCAACGTCCCTACCCGCTGCTCCTAGATCCCGAGCCGCCGCGGTATCTGCAGAGTCTGGGTGGCACCGAG  
CCGCCA  
CCTCCCGCCCGGCCGCGCCGCTGCATCCCCACGGCCCTGATCCCCGCGGCCGGGGCGTCA

>NM\_018750-Mouse-162mchr1\_P018809chr1-131070232131070932mchr1\_00665  
aagggtggatggcctcacctgcatcactttctcctgggactgcaagtgctcattagaccgggtgtttctctggcc  
ttttcaagttaaaacattgcttctctccaggcaggcaggataacattcctctcctgttacttcttaaccaccacc  
tgacstagcacctggaaaggcagaaggatcagggtgaaggatggagtagaggcatgggagcagtggaggatataa  
ctttactccaaagctatcaccacagcaagtgaggaaaaactgctccagaagcaacaggaaaggccaagggaactgtcc  
ccctgggtccatcctggttggtccctatgctggaatcctcaccaggagtctggcactcagccgggggtggggagg  
atgagtacacccagcagtgtttgggaaccttgctagaggaagtggcttagagctgcacagagcagtaacaggaagg  
cactgggaggagggtgtaggGGTGGCTTGTGACACATGGGGCGGGGAGCCAGCAGGCAGACACAACGCTCAAGACC  
ACA  
GATGGGGGTGCCAGAGAGCAAGGTGCGGGGGCCCCAGGGGCCCAAACCTGTGCAGGCGCTTGAACACCAGTT  
GAAGGAA  
GCAAGCACAGACTGCCTGCCGGAGAGCAGCCTGGTAACCCACTAGAACCCGCACCTGGGC

>NM\_011347-Mouse-163DBTSS:NM\_011347chr1+164130577164131277mchr1\_00060  
aagtgcagaaattcctcctggattttccctttctacctgcttagggttttttttctctctcttatttttgc  
tttgaccctctgaagtctactggaatttaaccattctctggcatccaccattaactggaatttactgggaatgtg  
gacgagtacaaagcaaaccttccaaaccttacaaccttagattggaactcctgtcataatcaaaggaaacctgaccctg  
ggatgcatgggtcctgatcctgctcagctctgggatgtccaggcatgattcacacctgctgctcagccggct  
tcttggaaagattgacctgctccccctggcaacagctcctcctagctgccaacactgtttctgcatatcaaca  
ggcaactttaggggaaaggcctgatacatttctgaaagcgaataggaagtgtttgttaggcagcctgacatcaac  
gggaggcagcaaaagtataaGAAGTGTGGTTTTTGGCTAGAGGGAAGAAAGCCAGACGGATCAGAGAGGACATGGTA  
AGCT  
CATTTTTCTCTTTATGGGAAGTAGAGGAGTTGAAGGGGCTTGTGTCTGAAGCAGACAGAAGAAAGATTTCAGA  
AAGTAAGG  
ACCAGCAATAGCCGTGGGGCTTTAGGCTGAATAGCTTTGGTAGAGTTCGAAGGCATTTTC

>NM\_011347-Mouse-164AF031662\_1chr1+164130493164131193mchr1\_00060  
tctttgacacgagagacagcgttctcagatagttcatgcttttccatagtcacttcaaaaacattccagcaatagt  
cccaagtgcagaaattcctcctggattttccctttctacctgcttagggttttttttctctctcttatttt  
ttgcttgaccctctgaagtctactggaatttaaccattctctggcatccaccattaactggaatttactgggaat  
gtgtgacgagtacaaagcaaaccttccaaaccttacaaccttagattggaactcctgtcataatcaaaggaaacctgacc  
cctgggtgcatgggtcctgatcctgctcagctctgggatgtccaggcatgattcacacctgctgctcagcc  
ggctcttggaaagattgacctgctccccctggcaacagctcctcctagctgccaacactgtttctgagatc  
aacaggccaacttaggggaAAGGCCGTGATACATTTCTGGAAAGCGAATAGGAAGTTGTTTTGTTAGGCAGCCTGA  
CAT  
CAACGGGAGGCAGCAAAAAGTATAAGAAGTGTGGTTTTTGGCTAGAGGGAAGAAAGCCAGACGGATCAGAGAGG  
ACATGGTA  
AGCTCATTTTTCTCTTTATGGGAAGTAGAGGAGTTGAAGGGGCTTGTGTCTGAAGCAGAC

>NM\_011347-Mouse-165mchr1\_P010431chr1+164164885164165585mchr1\_00060  
cagtgtgggtcctcctcaaaatcccctgtgctacctgagcagaaccacctgaagtcatctttcaaacagtacaggaa  
aagtcctctctgctgtagacagctgagaaacctagaagaggcaaatgctcagacatcagagggggccacggtgaa  
agactctttatctgtaaggaagcagtccttaattagttgtttcttttcagaaacccggtcgtccaatgtctcatt  
cgatttctcaggattccacatgcaagtgtcaagttcctgtcacactgactgtaactccatggcatttgggcatttgc  
gaggttctctgagtttaaaacaaaaacaaaaacaaaaaaggacaggaacctagaaaaagaactatgcatctt  
cccactctccaccacccttctgctcccccctcacttctcagctcccccctctgctcccccctcactt

cctccagctccgcccttccTGCTCCGCCCTCACCTTCTCCAGCTCAGCCACAGACCCAGGAGCAAATGTTTCTGCTC  
TGGTCTGTGGCTTGTGTTACTTTGCTGTTGCTGAAAACGGGAGAGTCCAAGGCCCTGGAGCATCTTCCTCAC  
CAGGTGA  
CCAGGCTCTGAAAACCGAAGGTCTTTCTCTTGGGATTGCAGAGTAGCAATGTTGGTGGG

>NM\_144808-Mouse-166mchr14\_P010233chr14-6212767562128375mchr14\_00475  
gtgcgaaactctgaaaaaaaaatgaatatgatcttttattggatcgttacaagttatttaattcttttgggtggctggg  
gtaggcaaaaaaaaaaaaaaaaaaagcagttatgaagcgtccatcctgcttacagaatattttagaattggagaaaac  
agaaaagtctcttagattcatcaacagtgttaaaccacaatgtctaccaagagaggggactctcctcaggagcgac  
aggatggaaggtcacgctgtgagtttccacaaaaggggctaggaaggacagatgggagggttccagagaatagcggagc  
ctgcagggcctccgtgagcaaggatggaattcatcaaggaagggtggatgaagctagagagagctaggatgcgagccgg  
ggatgcacaacgctggaggaccaggttggccagggtaacgacgctgttagctggcgggtcccacgtggcaggcccgggga  
gcggggcggggagcagggcgGGGGCGGGCCAGCGGTGACGCGCAGGGTATATGGCCGGGCATGCGCATGCGGGGG  
GGC  
CGGACGTAGAGAGGGGGCGCTGGCTGTTGGCGGGGACGCACCCACTCAGTAGCTGTGTGCGCCGCTGCCTTG  
GGGGGGG  
GGCCCTGGATAGTGAGGCTGCGTGGGCCCCACTGCCGGCTGGAGGACTTCAGGTGAGGAC

>NM\_144808-Mouse-167mchr14\_P010248chr14-6209282162093521mchr14\_00475  
ccccagtagcattggacctaggccagcccaagtcaggctccagcactctgttactgtattcttttctacttggggatg  
gggtgcacgctggggggtggaggggtccgctgagctgtcaggctaggttgaatttgcgtagcagctcagacattctt  
tgaggctgtgcttctccttggccaccaagtagccaagattaaggttccccttggaaatctgttcccaaacatctt  
tctataaccagattatagttgtgtccctgagcattcaccatggctgatctgagatccaaaccaggtttcaagtgagg  
gcttctgacgctcatcctggagacaagactccagattctctgagctggctgtgtctgttttctgttttcttca  
gggggttagttcctgcagggtcgagctgttagggcagggtaggcgggagtttggattctaagaaccttctgccc  
ctcctgatttcagtctttaGCTCTGGAGACCTCTTTGCGGCGCACAACTTGAGCGAGCGATCTCAGATCGGGGCGAGT  
G  
AGTTCCAGGAGTTCTGCCCCACCATTCTCCAGCAGCTGGATTCCCAGGCCTGCACCTCAGAAAACCAGAAGTCT  
GAGGAG  
AATGAACAGACAGAGGAGGGGAAGCCAAGCGCCATTGAAGGTAAGTACGGACTGGATTGG

>NM\_011410-Mouse-168mchr11\_P90078chr11+8277776482778464mchr11\_00437  
gcgctggcttatccactgcgttcggggcagagtaaggacctgaaatcatctcttttctgctgatacagctgaca  
ggcagcctgcattccttcagagagatttccccccagagtcattgctacaattgagaagaaggaactacctagttaag  
taaaaccaaggaaccaggaggtctgaacctcactcagcttgaatttgatgagtttctcctccttgcattt  
aagtaccatgtccatactgagtgctgaaggtactgggtatgaacagtttccatagttgaggtttgactgagatggcc  
agtgtcccaggtagcccacagctcctgtaaaggggactccaatgtagcatcattgactttaaagttcccagaggcctg  
agcattgtcctttgactttggtgtgagatgtgatttctctcttccatgtctgtgtgaacctggcatgctggct  
taggacatggcctgattcagGGGGTGTGAATGGGTGGGGCTGAAAGGGAAAGAATAATAGAGACCACATAACAGTG  
TAT  
GGAACAGGGTGGGGCTGCAGCATCTAACTCTCTCTCTTCTTTGCTGCTTGCCTTGTGGGACTGAGCAACTG  
CTAGAT  
CCTTAGATTTCCATTACAGCTGCTGCTGACCCTGTTGGGAGTTGGACTACAGATTGTA

>NM\_025565-Mouse-169mchr2\_P030804chr2-6914457069145270mchr2\_01119  
acataaaaataaataagtaaaataactcacgataaatcaatgttagaaaagcttgggaaattcaaacattaagttgggt  
aaatagtttggtaacttccagatgttccagcctaataatcataaactggagctgttcaagaggatttccgtcatttc  
caaaataaaacgagtgcaaggaagaaggaagatatgcataaaagaagcagttaaatttcaatttttacatttttcc  
ttcattctggggcaagccttctactcactatagaccgctccaagctgtctcagcaaaagaactcgaatccagaat  
gctctgctccatagttgtccgagagaattccgaggccgatcaaccaatccttgcacggagagctgcctgtcagcc  
aatcagaagacggagttgaaggcggtgaagcaggcggtggagagtttgaattgaaagactgcgcgctggaggagcagc

agaccgggagcagcagcagGAAAGAGCGGGGCTGGTTCTGCCGGACAGGTCCAGTCTGGTGGAGACCGGGCGT  
TCC  
TGGCCGCTCAGGTCGGGAGCCGTTTGAAGGGTTGTGGGGCTTCGCCGACCGCACGCCCGGGCTGAGGGAAGCC  
GGCCTGG  
GCATGTCGGCGTGGGTCCGCAGAGCCTGGAATGCGGGCGTCCGCTGTTAGCCGCGGAGTT

>NM\_011662-Mouse-170DBTSS:NM\_011662chr7+1939238119393081mchr7\_00434  
tgacgtcacacatgggagcactgtcgtgagtgctcctgctggtgctcctccacagcctgtgacatgatgggagg  
gtagatatagaataataaccacggctgatactacaaggctaattggtggtggtcctgctctagtaattggtggtgct  
gagaccacagaccctgcaaagaaagtacgatttaattctcagcttctggtgagaaatcaaggccagagaagctaa  
gcgacttggaagggtgcccagctaggaagaggctgagctgattcaatgactagcaccacagctccctctgttcaa  
gattgccctctatctggagatgaagatgaagacctgacatgtgtatctcttcttcttctgttcagccattgggaccg  
tggcacagccccctgagctgattcttctgcgccatgtctatacgttctctcctctgctgctgctccctcctcctgc  
tgccaccaccacctcacacTTCCTCCTTCACTTGGTTGGACGTCACACCAGGTCCCACCAGCCCCTGGACTGTGGTGT  
C  
CAGTGCATATCTGGCCACCATGGGGGCTCTGGAGCCCTCCTGGTGCCTTCTGTTCTTCTGTCCCTCCTGACTG  
TGGGAG  
GTGAGTCGGGGGCTTCTGTGGATGCCTCCTGTGTCTCAGCTCATGTTGGGGCCAGGAC

>NM\_011662-Mouse-171mchr7\_P002576chr7+1939151419392214mchr7\_00434  
gtgccagagagacccttccaccctctagctctagacttcagaaagaaactttggggctggagagatgattaagagc  
actgactgctctccagaggtccttagttcaattcccggcaaccacatggtggctcacaacctctgtaatgggatccga  
caccctcttctggtgtgtctgaagacagctgagtgattcatttaataaaataaataaataaacttttgaaaaag  
gaagaaagaagcttttgggttctttaggaaccagactcagggcagtagtggtgctgattatcagagacacctccccgacc  
ccaattctagagtcctcctccagagtggttagctctgtcccatgactactatctggcttccccttctcttgc  
accagggtgtcacaggcgtgacatacagtggggggtgggagggggggagggttctgcatctggctctgtcctaag  
ggctcaacctcaggttctCCTTCTCCAGTTCTCGATCAGGCTCCCACTGGGGACTAAAATAGTCCCAACCTCCTCTC  
C  
CATGATCTCCCCTCTGTCTGGCTCCCGGTTGCTCCCCTGCTTACCAGTGTAGCCTAGCCCAGCCAGCCAGTA  
GTCACC  
ACGTGGCCACCACCTGCCTCCCCTCAAAGCCCCAACTCTGTGTCTGTGGTGTGCACATCT

>NM\_019573-Mouse-172mchr8\_P90086chr8+113809122113809822mchr8\_00528  
gagggtctctagtgtaaatttgaaatgaccatgtcacagatcatgtcgtagtgtcaaaaggtgtacacctgacg  
ggcatgggacgaaactggagctcagaataatctcatcagaaccttccccctcccccccccttatagtccagttg  
agcttgactacattcccaggatactcactgctgggactcattcaggattgggtaaaacaataaggaagtgccttcgg  
gtcggccagcaactgacagctcctgcatgatgactgggtaagcaccccctccaggaggctgaggaagcttattccag  
ttctgagcgttctgcttttcttccacccccagccgttccatcttccggttccctccctgctcttctcag  
gctccgcccccttccgcccagtagctgcaaaaccggaaactggattacagccgagcggctgggagcagctgccc  
aggcgcgagcggctgtgtccCCTCCCGACGCGCGCGCGGTTGAAGCCAGAGTGAGTTGCTGAGGAGAGCAGGCG  
GC  
TACTTCTGTCTCCAGCATGGCAGCTCTGCGCTATGCGGGCCTGGACGACACGGACAGTGAGGATGAGCTGCCT  
CCGGGCT  
GGGAGGAGAGAACCACCAAGGACGGCTGGGTGTACTIONACGCCAAGTAAGCGGCTTGGAGC

>NM\_019573-Mouse-173mchr8\_P90087chr8+114049571114050271mchr8\_00528  
accaggctgctcattgaccttaattcactcaggattgaagtgtatgccaccgcccctggctgattgtctttaagg  
gtgatgcaagctcagttgacagattcataacctgggtgagcttcttggattagaactgtccattgcatctggccag  
gcttgctcttggctaccaccccctagtagatgctgctcttggagcacatattaatgataacctgagctagaaga  
caccttggagcctctccgtgtgtgagtgagccatgtgtaacccagcctagagatccagctgagctcctccatgct  
ccccgacttggcagtaaaagctgtgttcttccattctgtgtgatgtatgctctctgggcttctaataaaca  
ggggaattccgacatgtccataacgacatttactgtaactgataccacgaaccattctgtgttattatcatttct

tcttatttcctttcattgcaGCACAAAGCCAAGGTGGAAGCAATGACCCTGGACCTGGCCGTGCTCCGTAGCGTGCAGCA  
TTTTGCCGAAGCATTCAAGGCCAAGAATGTGTGAGTGTTCAGTTCGGGGGTCATACATCACAAATTCCTTCCT  
ATTGTAA  
TGTCTTTATCAGATGAACACCACCGGGGAGAACAAGACTGTAGTGTCTTGGCACCA

>NM\_019573-Mouse-174mchr8\_P90086chr8+113809122113809822mchr8\_00528  
gagggtctcttagttaaatttggaaatgacatgtcacagtatcatgtcgtagtgtcaaaaggtgtacacctgcag  
ggcatgggacgaaactggagctcagaataatctcatcagaacctttccccctccccccccctttatagtcagttg  
agcttgactacattcccagatactcactgctgggactcattcaggattgggtaaaacaataaggaagtccttcag  
gtcgcagcaactgtcagagctcctcatgatgactgggtaagcacgcccctccaggaggctgaggaagcttattccag  
ttctgagccgttctgcttttctccacccccacggcgttccatcttccggttccctccctgctcttctcag  
gctccgcccccttcccagtagctgcaaaaccggaaactggattacagccgagaccggctggcgagcagtcgccc  
aggcgcgagcgggtctgtgtccCCTCCCGGACGCGCGCGGGTGAAGCCAGAGTGAGTTGCTGAGGAGAGCAGGCG  
GC  
TACTTCTGTCTCCAGCATGGCAGCTCTGCGCTATGCGGGCCTGGACGACACGGACAGTGAGGATGAGCTGCCT  
CCGGGCT  
GGGAGGAGAGAACCACCAAGGACGGCTGGGTGTACTACGCCAAGTAAGCGGCCCTTGAGC

>NM\_019573-Mouse-175mchr8\_P90087chr8+114049571114050271mchr8\_00528  
accaggctgcctcatttgacctaatctcactcaggattgtaagtgtatgccaccgcccctggctggattgtcttaagg  
gtgatgcaagctcagttgacagatttcataacctgggtgagcttttgagattagaactgtccattgcatcgtggccag  
gcttgctcttggtgctacccacccctagtagatgctgctcttggagcacatatttaataaccatgagctagaaga  
caccttgagcctctccgtgtgctgagtgaaagcctatgttaacccagcctagagatccagctgagtcctccatgct  
ccccgacttgccagtaaaagctgtgttcttccattcattctggtgatgtatagctctctgggcttctaataaaca  
ggggaattccgacatgttccataacgcattactgtaactgataccacgaaccattctgtgttattatcatttct  
tcttatttcctttcattgcaGCACAAAGCCAAGGTGGAAGCAATGACCCTGGACCTGGCCGTGCTCCGTAGCGTGCAGCA  
TTTTGCCGAAGCATTCAAGGCCAAGAATGTGTGAGTGTTCAGTTCGGGGGTCATACATCACAAATTCCTTCCT  
ATTGTAA  
TGTCTTTATCAGATGAACACCACCGGGGAGAACAAGACTGTAGTGTCTTGGCACCA

>NM\_026099-Mouse-176DBTSS:NM\_026099chr18+5708549257086192mchr18\_00145  
aaaggaaaataatagaagatgctttgatttcttctgagctggaatctccatgaagctctggctgtcctagaatgca  
ctctgtgtagatcaggctagcctcaaatcccctatgtagccaggatacagtgtaaacacttggtgctccttttcc  
tggtgctgagattacaggtgtgtgtacagccacacttggtgtgtacagtgtaaaaggcgaacctagagttcagtcagga  
agagcaagtacccaactgacctccatccccaggctctgggccacgtagcttcttctgcaaatctcagtgctcca  
caatgtcccattttaaaccattcataatggtttccatgaagagacatacacacgaaagactctgacctgcatctc  
ttagctctgaggggtgtgtgagtaacaaggccattgttacatcaatggcagcagtttcatcagaattagactgtg  
gaggttctaggtgagaattcTGTCATTGCTGCCAGTGATGGCTTCAGAAAAAGATGACGGTCCGGCCTTACCCAAACT  
CG  
ACGACGACAACCAGACAGCAGAGAACACATGCAAACCTGCAGAAGAGCAGCCTCAACAGCTCAGGTAAGCAGG  
AGGGGCG  
GGGAGGCAGTGATTGAACACTGGCAGACTTTTCTCTGAGGAATAAATCTTTATTCTTTGG

>NM\_001004150-Mouse-177mchr15\_P013446chr15-8360922183609921mchr15\_00691  
agagcagggagtgaggagtacttggaaacagacgctgtgggagtgaggctcagatgactcaagctcagatgtcggccc  
ttctcaactgcacaacattatgtaattaaccaaacgctcagagcctggcttttattttttccatctgttaaag  
gaaaaaatagaccatgggtaggggattcatcctgtcttggaggagtacttggagggtgaggcaggaggattgcta  
gctctggggcagaagggtggagagagaaacggaagggttagaataggattgtactagttaggtgtgggtggccgggag  
gctgctcacactgttggctactggctattgatgactcaggtcgtgcccaccccttctagacaggactagctgcagg  
cggagagggaccgtggggcagaacgccagaccgcccagggtggaggggcggcgtcctgtccgctgggctcaagc  
caccgcccctcagggccgcaGTAGCCCGCCCGGACGCGGGAGCCGGAGGTACCTGGATCTCAGGGACAGGGCAGCGG  
GC

AGGGGGATCTCGTTGGGATCCGGGGCGCCCTGTTCTAGGCTGAAAAGGGAGGTGAGCTGCAAGACATCAGGG  
ACCCGGG  
TCCCCGCCTGGCCACCTGTTCTACAGGGGACAATGGTGCGGGCACCAGTTCCGCGCCGTG

>NM\_026414-Mouse-178mchr6\_P005505chr6+8696152586962225mchr6\_00494  
acataggtagtagaaaagtgactacgggcagataggatgatagattttatgctttttgactctggatccctctctg  
ttcttctccaggaattgtacaggatccgcagtaatttagaatgtatgagtcacctatcagtgaggctgtgagag  
atgagtgactgcagatgccttctctttgcccgaagcagtgatggggtgaggccaaaggggtccctcttctgaaacaggt  
agagactgctttctgtctctcttctaatgataaacatctgaatgtcatcacactgtatcctcatctgggctattc  
tagggcataggctggggagggtcccaggctccatcccctgacccgggctgtcttactcactgggtgggctggcaggtg  
cccgtaggtactgagggtgaggcacaatcctgtagttaggcaagatgctggcaggaggggcgggctagggtggagct  
tctagaacaaggagaatgaGGAACCTGGGGGCCAGGTTGGGCATCAAAAAGGCCCTGCAGAAGAAGCAGAACA  
CAG  
CCTGCCTCTGTGCCAGCAGCCAGCCAGACACTTTGTACCGGCTCCCTTCAACTCGTCCAGGCAGGGCAAGAAC  
ACGGCC  
CAGCCGACAGAGCCCTCGCTCTCCAGCGTGATTGCGCCCACACTCTTCTGTGCGTTTCTT

>NM\_009705-Mouse-179DBTSS:NM\_009705chr12+7442538274426082mchr12\_00023  
aaaaagccagactcaagaggactgatggggtaaattgttctaggatttaagcttgagatagaaagctgcagatgga  
tgctgacttggtgtgggtagcagatgacccgggtgcgggcaggccacggcagtgccaactcttcagccgagatagcg  
cctggggcgggtacatgtgtcaagttctcaagttccactgaggtctccaactggcaggagcgtgctcccgggaaacc  
acacaggtgccactctgatcagcggctttatggtatccgcttggtggcttaggcacggggcgggggagcgtgtcca  
gggaaagagaggacaggtccaatggtgacttaacggcaggcgcgtcccaggccctggagagctgtagtctccgagaagg  
tgcgcccggggctggtggaggcgtgtccgagagatgctgacgtcacaggcggtgcgctcgctagtagaagcatggaag  
ctgtgggaggctgactcacTCGAGGTCCTGAGTTGCACCGAGCCGGTTCTCCTAGGGTAATCCCCTCCCTGCCAATCA  
T  
GTTCTGAGGAGCAGCGCTCCCGTCTCCTCCACGGGCAAATTCCTTGCGTCCTGACGAGATCCGTCCACTCTG  
TAGCTA  
TAGTCGGAGCCCCTTCTCTCGGGGACAGGTGAGAGCTGCGACCCGAGCTGACGGGACAC

>NM\_009705-Mouse-180MMARGII1\_2chr12+7442537674426076mchr12\_00023  
gttttaaaaagccagactcaagaggactgatggggtaaattgttctaggatttaagcttgagatagaaagctgca  
gatggatgctgacttggtgtgggtagcagatgacccgggtgcgggcaggccacggcagtgccaactcttcagccgag  
atagcgcctggggcgggtacatgtgtcaagttctcaagttccactgaggtctccaactggcaggagcgtgctcccgg  
gaaaccacaggtgccactctgatcagcggctttatggtatccgcttggtggcttaggcacggggcgggggagcgt  
tgtccagggaagagaggacaggtccaatggtgacttaacggcaggcgcgtcccaggccctggagagctgtagtctccg  
agaaggtgcccggggctggtggaggcgtgtccgagagatgctgacgtcacaggcggtgcgctcgctagtagaagca  
tcgaagctgtgggaggctgcACTCACTCGAGGTCCTGAGTTGCACCGAGCCGGTTCTCCTAGGGTAATCCCCTCCCTGC  
C  
AATCATGTTCTGAGGAGCAGCGCTCCCGTCTCCTCCACGGGCAAATTCCTTGCGTCCTGACGAGATCCGTCC  
ACTCTG  
TAGCTATAGTCGGAGCCCCTTCTCTCGGGGACAGGTGAGAGCTGCGACCCGAGCTGACG

>NM\_145450-Mouse-181mchr12\_P008062chr12+107559422107560122mchr12\_00280  
cgaggcaggcagtggtctctactctgcaggcagtagacgctcattcttgagaaggaatgtgatctggaactgaac  
taaactcagtagacagatgtttcccatagcttcagacttgagaaagcatccaataggagagcaaggaaccagggccgg  
agggtgtgggatgagggccagtagcctggcagtggtccttactccaggccaggtatgtagctgcaaggacatatacga  
cacagaggcactggggccataataaaaagagaactgctccaccgatattgtaggggcggggaggcagaaagaccagt  
cacgatagcaggctgggaccactgcagagctgcccagatcctccagtcgcaacataagtggtagtgggagagga  
tgggcatgggcccgggctgttggccacgccacgggtggcgtgtgacgacactaaagcacgcccgaagcctgctggc  
acgcatcgttccgggcaacGCGCGGCGCTGGTTGCCGGCTAAGCTGGCTGTAGTATCTCCCCGCCGGGCGCCGGGAG  
GC

CGGTCCGGCGCGCAAGGTGGGTGCGCGCCTTGCGGGCCTCTGGGAGCTCGGGACCCCTCCGTCTGCGCCTGG  
GACCTG  
GTCCCCGAGCCCGAGACTCCCGTCTGGGACGCGATCCCCGAGCTCCCTGCCCTCAGCC

>NM\_009763-Mouse-182DBTSS:NM\_009763chr5+4242854442429244mchr5\_00666  
acaaaggaagaaaaggaaagacaaaacagccaccagtcaatccagagtcacaccagacaaactcctaagagtca  
acttaggaatggcatgtgattctgtgtgccttgtgccttgcgcttttctcaaagccatcaatctcactaagggtga  
gcacatgtctctcctggaaagactgtgtgaaccaggacagaatttaagtttgcttagggctcacatggtaacagattct  
atagaggtgtgtgtgtgtgtgtgtgtgtgtgctgcgcgcgcttcaaattcccattccttggggtccctccacg  
aggcgtctttgcccaggaatgccctaaagttaattctgtcgaatggaagaggaaagaggatgggaggtgggctggct  
tggcatctggatgagtcctgccaagctcagtaagggaaccgctcctcagtggaagaggaactgggaggtccaag  
aggccacgggctagaggaaatCAAAGTCTTCTTGATGGCTGTCCAGGGAGGCCTGTTGTCTCTGTGGCTGTGGCTATGG  
CT  
GTCCTTGCTGACAGTGCTTCTGGGGCAAGAGCGCGGTGGACAGGGGAGGGTACCACTCCTCACCTCCAGAGC  
ATCTTCC  
TGGGCCGCTGCGCAGAGTACACCACGCTGCTGAGCCTGGGGTAAGTGCTAAGCCAGACAG

>NM\_007695-Mouse-183mchr1\_P008483chr1+134070483134071183mchr1\_00293  
actgctaaaaggaggattgggactcccctctcactccccaggctctctggcttacctagcctctggaaacagcc  
aagagacagaaagaatctgaggggaagccaagcagataatggtggccttggggtgcatggctacataacccaa  
ttgtcctgtccagcctggacagagagccggagctgcccaggaagctgggagactactggcaagaagcaagactgagga  
agggaagaatcacaggaagggttgagatgtgactgtcccaccaggttatcacccccatgaccttcagctggcagg  
tactgaagacttgcceaaggcttcaaaaactccagggtttctcaatcctcctcaggtgactccccgctcactggcc  
agcaattgggtttacacacacacagttcctgtaaggaggcagtttggggggcgggggagtgatgagatgggatgggta  
taagaaggagatgtggagccTAAGGAAGAGGCCCTGACTAGGAAGCTGGGTAAGTAGGAGAAGCCATCATGCACACCT  
CTA  
CTGAAGCCAGGATGGGCATGAGGGCGGCACTGACAGGTCTCTGAGCTGCAGATTTTTTCAGGCTAAAGGGCCCA  
GACTACC  
CAAAGAATACTACTGCACAGGGGGCCAGCCTCCTACCTTCTTGGAGGAGGGGGAGGGGGCGG

>NM\_007759-Mouse-184MUSCRAB01\_1chr3+8843777688438476mchr3\_00066  
gcagcacctcctgtcaccaaaagaacgctgaattccgagctgtttcattgagtcatttcgactgccggttgcggg  
gggggggggggggacaattcttgcgctagtggggctcctcggatgctggagctgagctgtccagagcaciaatctggt  
agagaactactagggaaactggtgaaacgggacctgttgcctcagggccagagagcatcctgtagccaggcagag  
cctgcccgttcttgcagagcaciaaacccgttcttgccttctgacgcttctcggctcctactgatcgggagaa  
gggtatcttggctcttggagaacctggaccaccacatttctagaacaggaggattccggaaaggatgggggtgaa  
gtggtcacagagcagggccccagggtggtgtggaaggcggggcggggcggggccctcatgcaccagctgggtataaa  
agcctagagctctggcggcAGCGGCTGTGCAATTGTCTCCACGCGGCTTGGTCCCAGGTGGAAGGATCTGTTCTG  
CA  
AAGGAGACAGCAAAGTATCTTTAGCCTAAAGGACTCAGCGTCCAGTGTCTAGTTGAAGATCTAAAGAGAAA  
GCCACCTT  
GCTGCCACTATGCCTAACTTTTCTGGCAACTGGAAGATCATCCGATCGGAAAACCTTTGAG

>NM\_007759-Mouse-185mchr3\_P004125chr3+8843558588436285mchr3\_00066  
caatgaacaaagcaccagagtgctcctcactctgcgctggtctgttcccactcctcctcgcttcttctgctgct  
tccgctcctcattgtgtctcaactcctgtcgggagaggggcccccaagagggtctgatcactggaatggggctactt  
ggggcagatctgcagcagattggttataatgaaagaccagaggcaccggaaattccttcttattgattccagtg  
gaaataaaaccagtagttgggcttgggcttctaatggtggcagctcctccattgaacagctctgaggccttagccc  
tgcccccttggtagtggataccccatccacttgctgtagccccctcctcagccccctcctcagtgctcttccca  
gctgtctatgtctgcgattccccctggaataaaagggtgctgtagggccaaaagccttagccttagcatattgccccc  
ctcctcctcattcagcaaAGTTGGGGTGCAGGAGCTCCGGCCCTGAAGTCCAAACCAACACATCTGGAAGA  
A

TTCCCCGCCAGTCCCACCTCCCTTTGTCTTCTTCTGTCTCTGAAATCCTAGCCAGTTGCTAGAGGAGGGAG  
GTGGTG  
AGGGTAAAAGGAAGGGAGTGGGCCTAGGGCATCCACTCCCACCTGGGGGAACTTCCTCCA

>NM\_007759-Mouse-186mchr3\_P004127chr3+8843717688437876mchr3\_00066  
cttgtttgagatcctgaggggactacggggatagccccgggagactgagggcgaatgcaaagaaaggcaaacacttgt  
agctccagcacagagcaacgttgtttctggctttgggttaccgcgtgcctccgaggccgctcctgtcctttctgctgtc  
tcgctgtccttccactagggtttccaccacgtaaaaatcagcctcggagaggctgattaccgcactttcagctctagat  
aggagctctcagaccacccccctccccacacagttagccttcccccaacccggaggcaacgaggcaagccgagggtg  
gggggggggggtggggggggccttggcgtccttccccctcctgtggcccagggggccaggggaagcgtagccacc  
gagaaagcgccttaataaaaagagtcgtgtcaagtattggctgtgacctctgccttctagcctcagccgggggctcct  
gcttaacccttcattgtccgTCCAGGGCTTGAGAGGAATGAATGAGTTGCCTTGTGCTCACTTCAGGCGTCCCCAGGC  
A  
CTACTTGAACCCAGAGCTGAGTCAAGGGGTGGAGGACAGAGCAGCACCTCCCTGTCACCCAAAAGAACGCTTG  
AATTCCG  
AGCTGTTTCATTGAGTCCATTTGACTGCCGGTTGCCGGGGGGGGGGGGGGGGGACAATT

>NM\_007782-Mouse-187DBTSS:NM\_007782chr4+124394540124395240mchr4\_00809  
caaggaagaaaactgaagtaacgttacctgtcctggaatcttgattcttcccgggcagaggctcagccagactcag  
tgagaagagagctcctccaccagcctcattaatttccacgctattttgctcctcgttttgaataaacactt  
gaagacccagccctcccttggccctgtctgtctcgggtgctctgtgagcctcaaagcagaggagctcaggaatccgg  
agagaagggagggtggccacgggcccaggtgtcaaatgcccagccttaagaccctgaggcaggaaggtccctagct  
caccgatttccctcaacctctcctgagaggaaggggtgtctatgtccccaccccaagggtgaaggctcagccaaac  
gcagcaggaagccaggaaggtgtcgaattctgggtccccccccccccccctgtcattaacgacggggctagaaaga  
gaagtttcgggaactgcccCAAGAGGAGAGGAGACGAGAGAGAAGAGAGAGACACAAGCGTGGGGGCTGGGCACAGC  
GCC  
CTAGCCCCAGTGTAAGTAGGGGGAGGGCGGGGAGCCCTGGAGACCTCAGACCATTCCCCAACCCCTGCTAGGGC  
CACATCA  
GGGGGCCCAAGACAGGATCCTTGGGAAATGGGAGTCTCTCTGTGTGTATAGCATCAGGG

>NM\_024444-Mouse-188DBTSS:NM\_024444chr8-7105240571053105mchr8\_00430  
ttgggctgtgcaactggcttagatgcttgcctctctgagttcagtttgttcttctgttgacactcgggattctggt  
ccagactgcttacaggctgtgtgaggatcctgggcactgaagaaagcagacagttatgtagactagccagggcagag  
aggcataatttagggagaggagctacagcacttctcacacttaccacagagcagagctccacagtggtgaccagcct  
gttttctcacacctcttttggatatttctcatgaaaccatccaccgcttctcctcaaagtccttacacaaggggtg  
tgaagtcggagacactggtactcacttctgtgactctgacagtgagcttctgctcctcaaattggctccgcccc  
acatgatggccacctatccagggcagggagagcagctgggctgcaaggattggctggtctagcctagacttctctag  
tgcccctggtcaggagtcagAGAAGGGGAGAGACAGACCTGGGAAACACAGTGCTCCTGAGAGAAGGTACCAGACTAG  
GG  
CCATTGGGGCTGAGAGGTCCTAGGCTGGGGCAGGACAGGAAGTCAGAAGCAGATGTTGATTTCTGGCTAATAG  
TCCATGG  
TTTAGACTCTAATCAACCCTTTCTCCATCCTCTTTTCATTTCTCTCTCTCTATCTCCT

>NM\_007825-Mouse-189DBTSS:NM\_007825chr3-1789509617895796mchr3\_00757  
tctctgctgtacagtgctgtactactacggacgtggacttggtgtcatagcttggtgttacctgtggcttcttctgt  
gctgtgctgctggcagtaagaccctgcctctgctcctggtgtaaccttgcataatattgcctcaacctcaatcta  
agcacagtggacactggtggtgaaggtgatggggagcacaactgcagtatctgcagctgttttaggatgacctgtgcca  
cagggccacttctaaggctagtggggtggggagagcagggagtcaggcagggctccttctgcgagctcactgctgactga  
ctcaaaaacaccccccccccaacccccaggcttctgtggctccatctggggaatcctaactcttccctctcct  
tggcaggggtcctgtcaccggagcggagcggagcgggagggcgtgagggcggaacgcttgggtcagggggagggcggggg  
ggaggggactccactaactTGTAGTTCAGCTTTGGGGGCCGCTGTGACATTCTGCTCTGTGCAGCGGGCAGGCCACA  
GC

CTCTGGTCTAGAAGAGAGGGCACTGTGCAGAAGCCATCGCTCCCTACAGAGCCGCCAGCTCGTCGGGATGCAG  
GGAGCCA  
CGACCCTAGATGCCGCTCGCCAGGGCCTCTCGCCCTCCTAGGCCTTCTCTTTGCCGCCA

>NM\_010330-Mouse-190DBTSS:NM\_010330chr13+114182175114182875mchr13\_00508  
ggccaaaccttcagagggggagggtatgcacgactaatagaagcttgagaaacattaatagtagtaccgggcttgggg  
gcactgaatagcgccctcggtctggtagaagaacacctttgcacatccaaagatgtataggagcagaactatccggtcct  
ttcacctgtcacatcaaagtaaatgtgtgaacccatccaacggatggaaagaacactctgtggggagttgcaaccctc  
cgggaggtgatggggtacacacactggctggctccaggagctaggtcctcccaacactgttagccagagggtgggg  
gcgggagaggattcggcgccgaggttcacagcacatccgggcgcgcggtagcgggctgcgggctgataattgatgga  
aggccggcgcaattcgctgggagcgtctcgggggtggaggccaggcgccggccctcccactcggtttattctcga  
gtgtcctgtccccaggactgGCAGTGGGCGCCAGTTACCAGCAAGTGTACACAGGGACCAACGGAGACGGATCGCAG  
CG  
AGCTGAGGGTGCCTTAGCGACCTCCTGGACAGACCCGCCCGCCATGCGCTCGCACACTGGCCTGAGGGCGCT  
TGTGGC  
GCCTGGTTACCCGCTCCTCCTTCTATGTCTTCTGGCGGCGACGCGCCCTGATCCGGCTGA

>NM\_010296-Mouse-191AF189287\_1chr10-127465980127466680mchr10\_00757  
ccacgacatggggaaagctcagttacgaccaatgaagccgaagaccgaggtcttgggttaactttctgggtgagcttc  
ccccctcctctcccggcgcaatatttctcaatgtttctggctctggttcagagcctcttctggacagccgat  
ccaggatcccgccgggattactgtccaccaagagcagcgtgttcgggccccgggggggtagtaggcagtagtaggt  
ccctcaagggaggggaggatcctggggccctgggggtccataagcccggcaccctctctagcttctatccaacca  
gctcatcttagaacggtccgaaggaggatatacaggggaagtgcggaagagccgtagcgtgcgggtggcaacag  
cgagaaaaagttttgcaaaaggggaaaaaaaaagtttgccttctcggggtggtcccggctcagggccggggctgg  
gccggcgaggaggtggggCCAGGTTGGGAGGGTGGGGTGGCACTGAAGCTGCGCTGCAGTGGCCCTGTGACCCCC  
CTC  
CCCGCCACACACCTCCCCCCCCCCCCAGCCAGTTTCCAGCCCTGGACCACGCATCCCGAGCACCGCGCCCCGAC  
GGAGG  
TGAGAGGGGGGCAGGCGGGAGACCACCTGGGAGCGATGGGGGAGGGGCTGAGGAGATGCT

>NM\_010296-Mouse-192mchr10\_P010831chr10-127463393127464093mchr10\_00757  
cgtagtgcaatgtcgagctgggaggtcttgatgcgggattcgggtctcggtggaagaggagtagcaaaagta  
gccccggctacagcactttggctgggtcgtagggtcgggttccgttccccatttaccgccctcacctaaatccca  
gcatccgggatcaccaccgcccggccggcccctcccagtggttccacccacccgccccaccctccgt  
tcccgaaggctgaaaaactggagtgagtaaaaaactgttgaggaaagcggacctcgcacgctcctctctctcta  
gccttgaggactcgttttctcattccattaagaacttctgacagcccctcccatttccccaaaaccaaaggga  
taggtaaacccagagttaaaccgctcagaatgacttagctctcatccttttactaaaagtcggggagacgctctgc  
tctgaagtcttattccctccCACACATAGTTCTCTGTCTGAGGACAGATCATTTGTGTTCTTCTTGGCCCTACCAGTCT  
ATCTGGACTGAAACGAGGTCTCCCTCTAGTGGACACTGGAGAGATTGCTCATGAGCTCTGCTCTTGGGCATGA  
GCCGGCA  
GCCCTGGGCATGAAGTCAGACCTTCCGTGTGTTCCACCATCACACACCTCAAAGCTGGCC

>NM\_175459-Mouse-193mchr19\_P010565chr19-2775461327755313mchr19\_00367  
gtgtctgtgatgcgacacgcataccatgtgccccactgtgccttacctatttccccttccgttcttccgttttct  
tgcctttgttctctctctcctcagccttccgtgctccaacactcaccttcgtagcgggtccccgaggaagc  
tgacatttgagttgtggaatcccttctgttttctcttattcccctggtgtgttacttgaaccttcaatta  
cagatggcaaaaggagatttttagtactgaaaagcaacctgtccgagctgttccatctcagtcaccctaaaactg  
gcaccttaagaggcaaggctgtttctgaagcagcacgcatggaacagcttagccatgacaaggaaggaagaatagcatc  
cccagtgggacggatggagtcctcctgattagccccacgttcagcttctctgagctggagagcatgtcttag  
gcgtgagatcctaagaccccCTTCCCCCTGACAGGACTCATGCTGTTGAAAGTCTGCTCTGAACCTGTTAGACGCCA  
TT



GTAGTTCTGTAGGATGTAGCCTGCAAAGCCTTGAGGAATATCTATGGAATCAGAGCCAAGCTCCGGCTGGATG  
GGGACAG  
TGGTAGGAGTGGATGTTGTTGGCATGTGCAACTCACCAGGATACAACATTAACCGCACAC

>NM\_175459-Mouse-194mchr19\_P90108chr19-2781850327819203mchr19\_00367  
atatactgatcaacttcatcttgcattataaagtcggactttcaacattgtttcaacaataattcttagttctgca  
cagtgaattcaacctcatttggtgtgagtggtgattatcgaaagcttttgcattatagtttgcattggaa  
tcattatcttttgggtaatcagtgtaaagagatagctttaataaccagcacttggaaagatggacgcaagaagaacag  
gggctaaggcagctttggatacataaagtggaggtnnnnnnnnnnnnnnnnnnnnnnnnnnnnnnnnnnnnnn  
nnnnnnnnnnnnnnnnnnnnnnnnnnnnnnnnnnnnnnnnnnnnnnnnnnnnnnnnnnnnnnnnnnnnnnnn  
aaagagaaggtccaaggactgtctcacatgagccctgatgtaaattgtatgtactgattgctgatgtaaggagc  
atacaagtaacctgattcgtTTTGT'TTTTAGGGGCTCTTGGCTTGGGCTCAGTGCAAGTCCATTGGAAAAGGCAGC  
TG  
CAACAATCTAGTGGTCACCAGCAGTCCCATGATGGTTCAGCGACTGGGACCCATTTACCTCCAGCAAGCCAG  
GTCTCCA  
CAGCATGCAAGCAGATCAGTCCTAGCTTACCGAGGGCAGTGAATGCAGCCAACCTGAATA

>NM\_008230-Mouse-195AB039880\_1chr2-126367487126368187mchr2\_00159  
tcgaggcaagaaccagaacaagtgcattatgtagtaaatggataaaaagaatccttcatatcctgttgtgatctgtcctg  
agctcagcctggctagctatggcttctgagccggctctgcctcacctcatagagaagccagggcaggagcaactcc  
accctctgtgacttattgtgaatgccttggcctattctggcctctgagctaggagcttattcaaggctggggctc  
tatggctgaatgcagggcaggagatagagggctcttttacctgtctatccagagctgctttagctggaggc  
taggtgccccaaactggtcaaaacaccatgttctgattctgttatcaaatcagaaaggacggggacaag  
agaggctgaaattaagcctgaaggaaggagctttaggggggggctaaaggaggggaatagggaactcctaaataag  
agatgcactggctgcaggagAGTGCACAGCACAGACAAAGGCGACCAAGAAGCCCTGTTGACAGCTGCCTTCCAGCCT  
CC  
TCTGTCTGTCTGCCAGGAGGAGCAATCCAAGGGAGATGATGGAGCCCTGTGAATACCGTGAATACCGTGAATA  
CTACCGA  
GCTAGAGGTGAGTGACAGGGTGGGTCTTCCCTGCTGTTGGAGGCAGGTGAGTGT'TTGTAGT

>NM\_013563-Mouse-196DBTSS:NM\_013563chrX-9267158092672280mchrX\_00033  
cccatttagaagcggctctcactagggtcaacagggaccaactcagcagcagtaggggtggctattctagttgg  
attaggtcagaggaaagacagctatgtaagtaccacatgaatcatgtcagtagtcttccatccatcctcctagactgg  
agaactttgacagatgttaagatagcttagagggaaaagggtggctgggaatgatggtgtgtgggtgggggtgggttca  
gcagagccttctggacctagggtcctgaagggtcttgattctgtgacactgttgatcaagtattaatcttgacaga  
acatcaccttagagcagaacccaaatctccctggggacttagcttatgtcactgaacacattaccaacccccctctc  
ctacagcgtggttctaaaggtcttccaccggaagctacgacaaaaggaaatgtatgggtggggagggctgtgggaga  
gtggttcagggttctgacacAGACTACACCAGAGAAAGAAGAGCAAGCACCATGTTGAAACTATTATTGTACCTAG  
AT  
CCTTCTTAGTCCTTACAGCTGCTCCTGCTGAGGGCAGGGTGGAGCTCCAAGGTCCTCATGTCCAGTGCGAATGA  
AGACATC  
AAAGCTGGTAGGAAACCTAGGACCAGAGGGAGTTGTTGAGAGGAAGGCTATGGGGAAAGG

>NM\_013563-Mouse-197MMU21795\_1chrX-9267157192672271mchrX\_00033  
gaagccggctcactagggtcaacagggaccaactcagcagcagtaggggtggctattctagttggattaggtca  
gaggaaagacagctatgtaagtaccacatgaatcatgtcagtagtcttccatccatcctcctagactggagaacttg  
acagatgttaagatagcttagagggaaaagggtggctgggaatgatggtgtgtgggtgggggtgggttccagcagagcct  
tcctggacctagggtcctgaagggtcttgattctgtgacactgttgatcaagtattaatcttgacagaacatcacct  
tagagcagaacccaaatctccctggggacttagcttatgtcactgaacacattaccaacccccctcctacagcgt  
ggttctaaaggtcttccaccggaagctacgacaaaaggaaatgtatgggtggggagggctgtgggagagtgttcag  
ggttctgacagactacacCCAGAGAAAGAAGAGCAAGCACCATGTTGAAACTATTATTGTACCTAGATCCTTCTT  
AG

TCCTTCAGCTGCTCCTGCTGAGGGCAGGGTGGAGCTCCAAGGTCCTCATGTCCAGTGCGAATGAAGACATCAA  
AGCTGGT  
AGGAAACCTAGGACCAGAGGGAGTTGTTGAGAGGAAGGCTATGGGGAAAGGCCTGCTAG

>NM\_009909-Mouse-198DBTSS:NM\_009909chr1+7461287674613576mchr1\_00618  
agaggcaggcaaggaagaacatagcaactgagaacagaggcaagggtttctgagacagaggagaagggtcaagttcag  
gctgactttaagagtcaattgtggcagatcctcaccggaagagaggcagaggccccagcaggggcaggggtcaca  
gaagcagaagctctcttgctgaccctgagaggaagaaaggaagtctaacgcaagttcagccaggtccatctgcagggtc  
tgggacatccacatctcctgttaaaaaaggaggcataggtgggaaggaagctgacctctacctcagattggcaggct  
cctctagaagccatcagaaggcatgaaaatcccaagagctcacttcagaatcaccaggtgaacctgagcctggagccaga  
gtcccagaacagcctagcattcctctataggacacctccctgggggtgggacattgggtccagaggccctccaggact  
tccccatcggtagcccaggtCAGTAGTTTCCTCATCACGGCTGCCTCACTTTCTTCCAGTTCAACCAGCCCTGACAGCT  
C  
CCAAGCCTTGAGTCACAGAGAGTTGGGAGCCACTCTGCTCACAAACAGCGTCGTAGAACTACTGCAGGTAGGA  
GAGCTGA  
TTGGTCACGGACTAGGGAATATATTTCTGGTAAAAGGGACCAGGGAAGTCTGCCTTTCTCT

>NM\_009004-Mouse-199DBTSS:NM\_009004chr18+3506388035064580mchr18\_00306  
aaaagggggccgatactactgctgtcccgggtgccatcttgcttcgacgtctcaacgttggcgacagacgcgggg  
aactctgggaacacagtgcaatccgttcgcggtgctcgtgggtaagtgggtgggtcagttgcctaatagaagcg  
aagttctctaggaaaaaaaaaatctgcttttaactaataaaggacaagggttgcggctgaagcctcagaaaagaaac  
tctagatttagaattaagcgacaagaataaccaggatgaacaacatggaaggtcagttgtaaccggaccacattaa  
agcaaacggcttccggtaggctctgctcctcctctgctgattgggtccttcaggcttgccttttgattggccgga  
caagctcagcgcgagtttaaaacattgatgaggaacaaagctgtcctcgtggggcggagttgtgctctccagccgag  
gagcttctgctgccccgggtggGTAGAAGCTGGGATCAGAGAAGCGGCGAGGCAGACAGTCTTCGGGTGAGTGAAGTTGG  
GC  
TGGAGCCCCGGTTATCAGCTGCTGCTTGGCGTCCGTAGAAGGCTCCTGTGTCTTCCATAATTCTCTAGGTCTC  
GTGGTC  
TTTGAATAAGGTTGGAAAAGTACCCTTGGGATCCTAAAACACGCTCGCTGGCGGACCTG

>NM\_009004-Mouse-200mchr18\_P001989chr18+3506335835064058mchr18\_00306  
tttttaaaaaacttctaaaacgttcagttgaacgcaggcttattcccacgattcccagcggccaagggtccgact  
gccggcctactactttgcataaagttgttacatacgccccccccctaacctcgatataagagcgggtccctgggga  
agcagaaaaatggctgaactccgggagacgcgtttccctcggcaggaaaagcctacagctaacatatcactcagct  
gctcctcaccgctcggttagataaacagcagagtcgctggccacttactctgcctttccgtttaccctaggcagcgc  
tagccctcccacaaggcttccgggtgtttctccgcagcctccgtctcctccaacactgttaaccccagcggggg  
tcccgaagcagcaggaaggcagatctctgagctctgctcctccgacaaccctcctcccagcctttcacgcctga  
gaattgggatgctagtctcaACTCTACAAAGGCTTGACTATAAAAGGGGGCCGATACTCACTGCCTGTCCCGGTCCG  
C  
ATCTTGGCTTCGACGTCTTCAACGTTGGCGACAGACGCGGGAACTCTGGGAAACACAGTGCGAATCCGTTCCG  
CGGTGCC  
TCGTGGGTAATGTGGGTGGGTGAGTTTGGCCTAATAGAAGCGAAGTTCTCTAGGAAAAA

>NM\_008518-Mouse-201DBTSS:NM\_008518chr17+3368970633690406mchr17\_00020  
ccttgttgctcctccactccatctcctcaccctccctccgtgtgtgtgtgtgtgtgtgtgtgtgtgtgtgtgtgcg  
gctgctgctgctgctgcatgctgtgaggtgctgctgtcttgcagccctccctcagcactgtaaggtccagaagca  
tgaagaacacacagatactggagtcctactggccatgacaacctgtttgttgcctgcttctgcaagctccctc  
ctccctgggtctcatctcctcctcccaagccctctcatcttacctgaaaacctctctaccatctcctt  
ccccagttcagagaaccagcatccagccaccaaccccggccccagcctgggtaaacaggaagctgggtgaggggag  
gaagggtgttcggaagtccccgggagggggcaggtgtgtgggtctgccccgggtgggggggtctaccctgaggtatga  
aagccctgccccggtcctaGTTCTGAGTCTGGATGGGGACACGGGACTGCAGGCCTGGGTGGGAGACCCAGGGG  
AG



GCGGCAGGCTCGGGCTCGGTGCGCAGCCCGGGCAGCTCACGCCATACAGCCCTTACCTAGGAACCCCTGGACCC  
CCAAAC  
GGCTGTTTCAGAGGTCCCCTAGACGGGAAGGGCAAGTCGCCAGGCGGGTCTGTGGAGCG

>NM\_013589-Mouse-206mchr12\_P012248chr12-8020202880202728mchr12\_00027  
ctatgggcagagaagtcacacaaagaagagacaccaggtcacctgtacagctccgtctataaaaccatacaggaacct  
cagctgcccaatggctgagggggaccctgagctgatccctctggaagactgggggtccaatcatccttctcaagccatc  
ctgacttccaattaaccaggaatatgttattgttctgagcaggggaacaagctctcctggggagaggaattcagggtc  
ggaggtccagtactccaaggaagaaaaatccttggaaattctgtggggagtctgggtctcggcgaaggagcagaaatg  
cggttcctggttttggctctattaccaaatagttcaggttctggtagctctcgggtgccagtaccattccagcaag  
acatgggaaagtccattaggttcccagggttccagcagacacacttgaggatgacaagtgctcctgaccaatatattg  
acccttcgaaagaactcttCAGGGCTTTCAGAGAGGCTTCCCCTCCCAGATTCACAGATGTGTGAGTGGGCTTCG  
C  
AGCATTCTCCTGTCTCATCAGTGACAGGGAAATGACACATGGTGAGTCAGGGGCCATGCTGGGAACAGTTAAC  
CCCTCGT  
CCAACCTGGGCAGACAGGGTTCAGGGAACCAGAGTGTCTGATCACCCAGTTCTTCAGGT

>NM\_013589-Mouse-207mchr12\_P012269chr12-8012919580129895mchr12\_00027  
tttcttaccaggtcctcgccctgggtcttaggttcagaactgtccaactctgtgcctgaagctcaggatgtgtgggt  
agaaagagctgtattgaggtcctgatcagtggtccagaaaaaactgggtcatgccaggtcaccagggacaggaga  
ccaagaaggaagtaggaccaagaaaactaggagattccaagaatctgggactcagcagctatgggtgcccggacactagt  
tcagtcagaggaattcattccttcttagaacttctcttaatccacagctcagggcagagaggatggtgggtaacc  
acatgatcaaggccacagggcgggaggaagtctgttatgggtctgatggggatggtgggtgggaaatggggactcctgtc  
attggacacctggaaggaatgcaggaggcttcttctccaactgagaggagactgggctaccataaggatctccggc  
cttgggttctgggatggtcAGTCCAAAAGGGAGTTGACAGGCTGAGGCAGGTCAAAGAGTTGCACTCTGGGTCTTG  
C  
TCATCTTGCTGGGGACGTAGCGAGGGGGCAGACTGTGAAGCAGTCCCACATGGAGGGCAAAGGCCGCTGCCT  
CCCCTCC  
TGGAGCTCATCTTGTCTTCTTTTCCAGGTGACTCTCGGGCTGTTTCAGGTGAGTGAGCCT

>NM\_011841-Mouse-208DBTSS:NM\_011841chr11-6110656461107264mchr11\_00436  
aactccggcgccgaaagagtgcgcagcaaatccttaggaaataaagctaacaaggaaggaagaggagccaaaaggacg  
gggtgggggtgggggggtgcgagcttgtgcctaggtaacaccctcctcctctatctccgcttcgggcctgt  
ggagcagtaggtcagaagtaagagaacttggtggggccttctcctccccccaccaccaagctccggaggct  
gctagtacgcatgctgagagcatggtgcggggtgctgcgcgcacccctgaggagcagcatcacccttgggcggtcc  
cgccggagtgggacagctgggcgctgcgcgcgcgctgattgacaaggcgcggtttccgctccgtaagtttg  
attggacagagtaaaataaaggggtgggaacctccacggaggccgctcaacgattggctgggagctggaggagcgtggtc  
ccggggcgccgggtggggtGTCTGCTTCGGCGCACGCGAGGCTTTGGTGGTGGCCGCGGTCTTGTTAAGTGAGCGA  
GC  
CCGGGGGAACACTCATCACTGGGTGGAAGACTCAGGAATCCCAAATTCCTGAGGAGGCGTGGCGGGGGGT  
GCCGGCC  
GGTCGGTGAGTGCGATCCCGGGAGTCCCAGCGCCCCGCCCTCCCTTTCTTCGGGGCCG

>NM\_010809-Mouse-209AF077676\_1chr9+74218087422508mchr9\_00064  
tagttcagtaaatcatatcaatatatgagctttatagaaaaaggtattatagcccatgatctttaaataatgtggtc  
actgatagtgtgactgtagctatacatgcagacatttcttaccttctcacagtattcagcttgggtcttggaa  
ttctttgtacaactggacttttaccaggttagtccacttctcaagtcacaaacattacagctctggaaggacagt  
taaattttccaaagtggaaaaaatgccccagtttctcttttccaaggcaggaagcatttctggagattaatcaca  
ttgccttgcaaaattaagaaggttgaagaacttagtaagaagattgtatcacctactctgattttaatttttggg  
agtgtgccatttggatggaagcaattatgagtcagtttgggtgactctacaacacaaccactctataaaagtggg  
cttaagaaggtggacctagaAGGAGGCAGCAGAGAACCCTACTGAAGGTGGTACAGAGCTGTGGGAAGTCAATGAAAA  
TGA

AGGGTCTTCCGGTCTGCTGTGGCTGTGTGTGGTTGTGTGCTCATCCTACCCATTGCATGACAGTGCAAGGGA  
TGATGAT  
GCTGGTATGGAGCTTCTGCAGGTAAGGGGTGAAAATGGCCTCTGGGCTTTTGGTGGGGCA

>NM\_013599-Mouse-210DBTSS:NM\_013599chr2+165010849165011549mchr2\_00086  
gccaggagaggaagctgagtcaaagactctatcagggggcggggatgagaggatagaacctacagtgtggggatgggctc  
caggctgactctggccaggaggggggtgtctcagaagccaaggaagaggggtctcgggctcaggtctcccagtcttt  
tactgggctgatcagtcagggccgtcagacctagggttagtgaatgccccatcctgcacaccctcttcccttcccac  
aaagtctgcagtttgcaaaaactaaacctgagttctgtggttctgtgggtctggggctcctgcctgacttggcaatg  
ggggactgtgggcagggcataaggaggggtagtgtaaacacacacacacacacacacacacacacacacacacacaca  
cacacacacacgctgagtcagcataagcctggaggggagggcggggtcactgattccgttttactgcctctttaaact  
ctgcaaaggcagcgttagcCAGAAGCTGCGGTCTCACCATGAGTCCCTGGCAGCCCCTGCTCCTGGCTCTCCTGGCT  
T  
TCGGCTGCAGCTCTGCTGCCCCTTACCAGCGCCAGCCGACTTTTGTGGTCTTCCCCAAAGACCTGAAAACCTCC  
AACCTC  
ACGGACACCCAGCTGGCAGAGGTAGACAGATGGCTCGGTGGATAGCTGAGAAGGGCTGGT

>NM\_013599-Mouse-211AF000957\_1chr2+165010844165011544mchr2\_00086  
cagaggccaggagaggaagctgagtcaaagactctatcagggggcggggatgagaggatagaacctacagtgtggggatg  
ggctcaggctgactctggccaggaggggggtgtctcagaagccaaggaagaggggtctcgggctcaggtctcccag  
tcttttactgggctgatcagtcagggccgtcagacctagggttagtgaatgccccatcctgcacaccctcttccctt  
cccacaaagtctgcagtttgcaaaaactaaacctgagttctgtggttctgtgggtctggggctcctgcctgacttgg  
caatgggggactgtgggcagggcataaggaggggtagtgtaaacacacacacacacacacacacacacacacacacac  
acacacacacacacgctgagtcagcataagcctggaggggagggcggggtcactgattccgttttactgcctcttta  
aaatctctgcaaaggcagcgtTAGCCAGAAGCTGCGGTCTCACCATGAGTCCCTGGCAGCCCCTGCTCCTGGCTCTCC  
T  
GGCTTTTCGGCTGCAGCTCTGCTGCCCCTTACCAGCGCCAGCCGACTTTTGTGGTCTTCCCCAAAGACCTGAAAA  
CCTCCA  
ACCTCACGGACACCCAGCTGGCAGAGGTAGACAGATGGCTCGGTGGATAGCTGAGAAGGG

>NM\_013599-Mouse-212AF403768\_1chr2+165010850165011550mchr2\_00086  
ccaggagaggaagctgagtcaaagactctatcagggggcggggatgagaggatagaacctacagtgtggggatgggctcc  
aggctgactctggccaggaggggggtgtctcagaagccaaggaagaggggtctcgggctcaggtctcccagtctttt  
actgggctgatcagtcagggccgtcagacctagggttagtgaatgccccatcctgcacaccctcttcccttcccaca  
aagtctgcagtttgcaaaaactaaacctgagttctgtggttctgtgggtctggggctcctgcctgacttggcaatgg  
gggactgtgggcagggcataaggaggggtagtgtaaacacacacacacacacacacacacacacacacacacacaca  
acacacacacacacgctgagtcagcataagcctggaggggagggcggggtcactgattccgttttactgcctctttaaact  
ctgcaaaggcagcgttagcAGAAGCTGCGGTCTCACCATGAGTCCCTGGCAGCCCCTGCTCCTGGCTCTCCTGGCTT  
T  
CGGCTGCAGCTCTGCTGCCCCTTACCAGCGCCAGCCGACTTTTGTGGTCTTCCCCAAAGACCTGAAAACCTCCA  
ACCTCA  
CGGACACCCAGCTGGCAGAGGTAGACAGATGGCTCGGTGGATAGCTGAGAAGGGCTGGT

>NM\_013599-Mouse-213mchr2\_P015544chr2+165012381165013081mchr2\_00086  
cttttacctcaggatccaaaactactctgaagactgcccgcgagacatgatcagtcgacccctcgcgcgccttcgc  
gggtgtggggcgaggtggcaccctcaccttccccgcgtgtacggaccgaagcggacattgtcatccagtttggtgtcg  
cgggtgagaattcccggtcgggcaggctatgggagggagcaccacggacagagtagaaggacagcagatctgtccgct  
ctatgctgccccacaatcctagtcgctgcttccaaaatgacctcccccaacccccagcggcttggagtcgcagtc  
acctctctaaagtctggtgctgctcagcgggagacacagtcgctttagtctcttgccttaagagagcaaagtg  
ttgctgattgagtccttctcctgatggcctcttgagagcagggagcgggtatcccttcgacggcaaggcggcct  
ctggcacacgcctttcccCTGGCGCCGGCTTCAGGGAGATGCCCATTTTCGACGACGACGAGTTGTGGTTCGCTGGGC  
A

AAGGCGTCGGTGAGATCCTGAGCCTTCCAGTATCCGCCCATCCCCACCCTGTCCAACTCCCTTCTTACA  
CTGGTG  
TGTGGCCAGACGCCCTGACTCTAGCCTCCTTTCTACAGTGATCCCCACTTACTATGGAAA

>NM\_008626-Mouse-214DBTSS:NM\_008626chr11+104963308104964008mchr11\_00886  
gactggccacctgagtcagtcgcatccatccttcggctggccaggcctcgagcagcccaggcttcgccacgcggtg  
aagtctcgcaaagtttgcagttgcttcgctctcgccagcaggagaagctgtgacgagcgtctggggctccagg  
cccgtctgaaaagagaggtagacaaggcgggaaggaattaagaagcagaataggggaagataaagagcgcacactggg  
atccttggacctcgtgatcctctccagccttcgctcctcctcccgacacgactcccttgcggccgggtc  
cccagcctgcgccccgcctcctccgctcccctcccagctgcccgttccctccctctgcccctcaaaccctct  
ccagggttctgcgctcctccctccgctcctctgcggggcctgctcctcctcctcctcctccgggaggcacttc  
gtccggaccggaggagatGCGATCCCCCTCGCCGGCGGTATCTGAGCACAGCGCTAGGGCTGTCTCTGCACGCAGC  
CC  
TGCCGTGCGCCCTCCGTA CTCTCGTCTCCGAGCGCCGAGGGATGGTACCCATCCGACCTGCCCTCGCGCCCT  
GGCTC  
GTCACCTGCTGCGCTGCGTCTTGCTTCTCGGGGACTGCGTCTCGGCCACCCGGCGGACT

>NM\_008626-Mouse-215mchr11\_P014922chr11+104983813104984513mchr11\_00886  
caggagacgagaatctcacgctacactattcccgtcaggcatcgataacacactgtcagcccacatgttaaacca  
gaaggaaggacatgtctgaaaagaaggagagaggaatccatcccgtggcgactgcacagaaaaggcagagcagcctgt  
gctgcgggcaaaagggttaggcaaaagcactgaagcaatgggtggccacagttggacagggcaggaactgatagctgt  
gagcaggaggaaggagaggagagagggaaacccacctcaggttttggtagggtagaagtgggtaggactgtgtctcg  
aggggagggatggctccacccctgcccagagtcctgtgtctacaactatagggcacagtctagcagagggatgta  
gggtgaactgctgggtctccagggtgaccccttagcaaatggagctggcagcttctgctgactcaaggacattccag  
gcttgaccttaaggccaattAAAAACAGCTGCTTCTCTTGGCTGGCAGCCCCTGAGCCAGGCTCTGGCTCTCCCTGGAA  
T  
GACAGCCTCACCTCTCCCTCTATGTGACCTGGGGAGGGGACTAATAAGAGGGATGCTGAAGGACTGAAGGCCA  
CACTGCA  
ATCTTTAGGTCAGATCTCCCCCCCCCCCCACCCCTAGAGTCACCAGCTCTCCAAGAGCT

>NM\_010751-Mouse-216DBTSS:NM\_010751chr6-8700225487002954mchr6\_01102  
acaggtcggcgccagtgggcggggaccgcccctgcctcctgcttagccaatcagcagcacgggagtgggccgctg  
cttgggcagagaggtgacgtcatcgtagccgggaggttccgaggattaggccaatgaggcggggcgagcggcattcc  
ctatactgacttgccaataaccggagagcccaagggggccggctatcggcgtagagccaatgggagggcaggtgaa  
cacgagggaggtgagctcagccaatggggcgtggggggcgagcccggcctgtcaagcccggccaaccggc  
gggggaagcgggcttctggggcggggcggcgggacttcccaatcgcgaggggccggggcgggccggcgggcg  
cccaatgaggcagccgcccgggctgtcaaggagcggggcggggcgggcgggcgagtcgggataaacactc  
ggcggtagggctgggtcTGCTCTCCGTGCTGTCCCATCGCTGCCCTCCTGGCTGGCCAGCGCGGGCTCCTCGGT  
G  
TTCCCGGCCGGTGGCCCCGCGGCACGGAGAGGCGGCCCGGGTGCAGGATGGCGACAGCCGTGGGATGAA  
CATCCAG  
CTGCTGCTGGAGGCGGCCACTACCTGGAGCGGCGGAGAGAGGTGCACGGCGGGCTGCG

>NM\_010875-Mouse-217DBTSS:NM\_010875chr9-4992517449925874mchr9\_00063  
agaagaaggagaagaaggagaagaagaagaagcagaagcagcatatgctttttattgcaaggacttagtaactaaact  
ggaggggggggtgccacaacttgaatcgaaccgaatctaaatcttttcccctaattataaaaacttcaaa  
ttctgattaaggaacgcccggagggcagaatgatctcaaaagcgtgaatgaaggaaaagggtgaaaagaaatcccagct  
ctgctggaaggttccctgtgaaagagcccggctccttgtaactcaggccgctttacaggcagccgatctgct  
cccctgtcttacctcctgtagtaggaactatttggtcggcgtggtggaaggacacagtgaggctctcacctccg  
ccccgcccgtcgtcgcaccccagttccatcaaagccaaccgggcccagcgcagggatctccgagttgagtgctg  
tgaggctgggactgtcactcATTCTCCGCTCAGCGCGTGAACGCAGCTCGGCAGTGGCTGGCAAGAAACAATTCTGCA  
AA



CCATTTGGGGGTTTGGGAACCGTCGCTAATTGGGTTTCATGTGTGAGTCGCCCCAGCCCAGCCCAGAGCCTGG  
GCAAGCA  
CACCTCCAGGCCTGGCTCTAGAATTCCCCAAACCACCCAGCCCACCTGCCAGGACCAG

>NM\_023699-Mouse-222mchr14\_P003825chr14+4780028147800981mchr14\_00137  
acagagctggactcagaggataccctccatgctgctgttggccctgggggaacccttcctatggtgctgccctat  
tgggattccccgacccccaccctcgccaggatgactcaccaccgccccgtcccccccttcactggcacctggg  
agagccagccagctaggtcggtgaggctggggggccaggaggaatgcagggggtgctgggggtggtcgtgttctgag  
tgtccagcatccgattacctccatctctccacgctgaccccgacctcgtagaggacacatctgaaactgggg  
ggacggctctcctagattaccctccaccagaaggcttgggggctatcgagaggctggaggtcagggcggaggcgctt  
tctcagcccagccctggcagcagcagcctgtctcgtggagcttctcggacgctccgacgaggcagccctgtat  
gcagcgtgcgacgaggtggaGTCTGAACTTAATGAAGCAGCCTCCCGTTTTGGCTTGAGCTCTCCGCTGCCCTCGCCC  
CG  
GGCTTCTCCTAGGCCATGGACCCCGGAGGATCCCTGGAGCCTATACGGTCCAAGCTCGGGAGGCCGAGCGCCAG  
AGGATA  
GCTGGCTACTCCTCAGCGCTCCTGGGCCCGTCCAGCCTCCCTCGGCCTGCTTCTCCCT

>NM\_183091-Mouse-223mchr15\_P015235chr15-7696392076964620mchr15\_00682  
ggaggcaccatccctgtcccaagagggagtaggtggctccctgggatcctccaagagggcagcttcctaagtgttc  
attgccacgcacatttaggctgaaccacagaatggtcagccggggtctaggtggttaatagccgtaactggtg  
aacatcaatgatcataggtattcgggtgctcactgttccaaggttggtggacaccagacgctctgagctcctattac  
cccatccccacaggcagaacctctctatgaagatctgtccgggcccatacaacctgggtgcatccactggcgagg  
aggcagcactctcaggcctgctgcttagaaggggcccgggaatgtcccgtgctatgaagatgagattcatggaga  
gtgaatgttgcgtgctagtgctccaggctacctctcttcatcgctgcttgggcttggacttggctacaggtcttag  
ttttttctcctctttccaGGTGCTCCAAGATCTGGGGACTTCTTAGCTGCCAAACGAGCCCTGAAGAAGGCCTATAG  
GTTGGGCTCTCAGAAGCCTAACCCAGAGAGTGAAGTGTCTGTGACAGTCTCAAGTATGGTGAGGCTGCATGGGGG  
CCTGGAA  
CTGAGAGCCTCAGGGTCTGAGAAGGTCTCTGCTCTTCTGACAGGAGAGATCCAGCTTAT

>NM\_183091-Mouse-224mchr15\_P90103chr15-7696586376966563mchr15\_00682  
ccagacccccctcttttttttttttttttttttttctctctgtgcatcattggctttcaggaattgcaat  
ttgctctgtagaccaggatggcctcaaattagaaattgctgtcctggcctcctgagtgctgggattaaaggcgtatg  
ccaccaagccgtctaatacctaaaaaaaaaaaaaaaaaaaggcaggtagattcaggggagcagggctcagctgtagtc  
ctgtaactcaccagaaaggcactctctgcttgggtgccgctactctgacagcagcctgaaggcccagatcctacca  
acagacctctgccactgatggcggcagtaggactacaaatcccagaaggcctggagctaccgacttgggcccacca  
aggggcccgggtaagcatgcgctcagaagagtggtgggcttgcgtgtatgggtggagtgagaaaatgggctgggct  
cagggaaagcgggaagtgcAGATTTTCGCGGCGGCGGTGGCTTGTCTGGCTATGACCCTGGAACAGGAGCTTCGCC  
GTG  
AGTATTTTGGGGAGTGATGTCGGGACGCAGGGTGTGGATCGGGTCTGGGTTAGACTCGATTCTCTCTCCG  
GCAGAGC  
TGAGCAAGGCCAAGACCAGGGCCCAGAGGAATGGACAGCTGCGCGAGGAGGCGGCCTACT

>NM\_145630-Mouse-225mchrX\_P012828chrX-8538352685384226mchrX\_00079  
attcaccggagtgaaaggtgggagcagtgagtagctccaggacaggttaattgctaataactgaatcctgtgc  
cgtgtaattgtgtgtgtagggggaggtgggggtgggaccagtagctccacttaattctgtaattaattgttggaa  
cgtaggaccacatggaacaactaaagctgaggagtcagcagatctgaggagggccttcggaagaggggctcgggtg  
gggaggtctagaccctaaaaatagctcaggcgtgggctcccaatggcctcaagtctcgagcactctcaagactg  
atccggggcgggacctgcaggaacggagctggctggtaccagcccagaccagaggtttgtgtcgtgttaccggggc  
ttaaggaagcttaggcggcggcagccaatcagcagcgcgctgcagccgctacccttagcggcctcacatc  
ccagcgcgcccgtacgtgCGGCGGACAGATCCCGCCTTTTTACAGCGGGGCTTGGGAAGCCGCGGGCAGCCGGCCAC  
GG



CCGCCAACTGCTGCCCGTACTTGTGTAGGTGTCGCGGCAGGCGAGCAGCTGCTGGCGCCAAGGCCGAGCCCC  
AGGTAG  
AGGTAAGCCCCGCCGGCGCCGCTCCTCCTCGCGGCTAGGCGGCGGTGACCGCCTCGGC

>NM\_019549-Mouse-226DBTSS:NM\_019549chr11-1690400016904700mchr11\_00605  
tgaaaattcatgatttcattttctttacagctgggactcctaggatttggggacaacaaagacaggggtgggtgggt  
gtgtgtgggggtggcgagcactcacctgactggctgggccacatgccagtggtgggatggagacagcgtcttgccatt  
tattaagtacttttcaatacttcaagaacaattcctaagcaggacagctcagggcataaagttttattatcatctct  
taccattttttctcttttagctcaggactttacatatgggtaaatattgactaagctgtgcgttattatttccatca  
ttaggaaagcatgggctgttcagatatctagttcctctttctgactctcaccacagagaggggaaaaggatgtcatcac  
gtagtaccagcagaagagaattgtgaaagagacctcctgtaaaaaggcagccacaacacctcagcctcagagg  
agactgagctcctcagacgaCAAGAGTGGACCCGTGTGTCTCCCCACCAGGCATGGAACCAAAGCGGATCAGGGAGGG  
AT  
ACCTTGTGAAGAAGGTAAGTAGGGAGGTCACCTTACAAGGCTGGACTTAGAGAGGGGCTTACAGGGGATTAGT  
GTTTGCTC  
CATACTCTCTGTCCATCCCTTCCAGGGATGCTCCATGTTGGATCTATTAGATTAGGATGA

>NM\_144944-Mouse-227mchr2\_P025185chr2-132134313132135013mchr2\_01183  
cctctggaataaagtagggctctgggtagcctcagatagctggaggtagactcggattgtcttgaatagccaagg  
aactacaggaagatcatcccagtttagaccagaacctcagaattgaagtttcatgaggcaagccatgccaccacta  
atttccagctttgctcttaaggtctgattgcatatggggggcctctctgcatcacttctaaggggaagactaggcttc  
acccttacttgctggctctgggaactgtgacacacacatacacacacacacacacacacacacacacacacacac  
actccaactctgcacacttagtggaaaccacaatgcttgcagaggacagtgctccgtctcaaggatggccagctgctga  
ggtcacaacgggttaagagcttacaaccccttggaggaccaccgggaagctgagaccctaattcagtagatctagg  
aggcaggcgggtctcgggggCGGAGTCCGGGCGCCGGGAGGGGCGGGACACCTGGGCTGGGTCCGGGGCTGTTGGAT  
GAG  
CTGCAGAGCGAAGCAGCAACTCCAGAAAGACTGATGCGAGGAGAGCAGGACCAAGCGACACACGCCACCAAG  
TAGGCAA  
GCCTCAACCAGAGCTAGTGTTCAGAGCCCGGGCCGCGCCACCTATGGTGGCGCCACC

>NM\_011193-Mouse-228mchr9\_P004467chr9+5628862456289324mchr9\_00030  
cattcttgatacgaacactttccagagactggaagtacagatggggaggctgaggctctgagtaggtcaatcaagg  
tccgtccactagtgaaaggcagaatccaaactaaacaaaagctgagcctgagctccagactcctgtctccctctatcac  
agttatgaaactgaagatggaatgggtgaagattgacggggcaaggaccctgctcatcactgaggtcccttagc  
tagttaccttctcaaaacaagtctccactctcatagccccgggaccaggaccgaattgagtcgccccgtgctgtgagc  
aactgagggttaggacctagctagggtgcatgaaactgtaaaagtggatgaatggtggacgtcctttccggggtagac  
cctaagaacctaacctctggggccggcgagagtaacagctcatgagattcctaactgttagttctaaagctaaactggg  
ccaggacttgagcaggcagcAGGGTGGCAGGTGGCAGGCGGGGCTGGGCTGTGCAGGAGAAACTCAGCAGCTCAAC  
TTC  
CTGTGGGTTAGAGCCCTGCGCCTGCCCTGGGGGAGGTTGCACAAACCTTCCTGTGCCGGCCTCAGGCTGCCTGC  
CTGCCCT  
GCCTGGCCTGTGCACATCCTTCTCTCTCCCAGCCTCTGCCTGCCACCTGGGCTGCCTGC

>NM\_011210-Mouse-229DBTSS:NM\_011210chr1-138064318138065018mchr1\_00432  
gtagttttgataggaagccacatcaccgaggaaataggcataaccatttgagctgagctcctatggtaataaacagg  
agttggcagacataagcagaagacagttggtttgggtcacttgctctcaacgaactcagagcctctaccagct  
tagtcaactgtgtatcttccaaccctatggtttatactcatgtggaagctgtcatatctgggtaagaaaattatt  
gatgactgggagggtgattgttttgaataaagcttcttaaaaagataaaaaaggagcaatatttatagttt  
aaaactgtttccttagaggaaattgagacgaaccgtaacagcataattactgaattaaggaagtaagaagccatt  
gcaactgattgaacgaccttttttttttaactcctgcaagaggaccctttacagtattttggagaagtt  
agtaaaaccgaatctgacatCACCATTTAGCAGTGCATGTAGCTAGCAAGTGGTTTTGTTCTTAGGGTAAGAGAGTAGG  
AA

ACTTGCTCCCCATCTGATAAGACAGAGTGCAAAGTATGCGTCTTTTCTTTTAGTTTTGACTTAGCTTACAG  
AGACAAA  
CTTCAAGAGAGATAACCATTATTTTGCCTTTCAGGGAGACCCTATTTCTTAGGGGCACAG

>NM\_011210-Mouse-230MUSLCA01\_1chr1-138064233138064933mchr1\_00432  
gcagacataagcagaaagacagttggtttgggtcacttggtcgtcttcaacgaactcagagcctcgtaccagcttagtc  
actgtgtatcttgccaaccctatgtgttatactcatgtggaagctgtcatatctgggtaagaaaattattgatga  
cttgggaggatgtattgttttgaataaagcttcttaaaaagatattaaaaaggagcaatatttatagtttaaac  
tgtttccttagaggaaaattgagacgaaccgtaacagcataaacttgaattaaggaagtaagaagccattgcact  
gacttgaacgaccttttttttttaacttctgcaaagaggacccttacagtattttggagaagtagtaa  
aacccaatctgacatcaccatttagcagtgcatgtagtagcaagtggttcttaggtaagagagtaggaaacttg  
ctcccactgataagacagAGTGCAAAGTATGCGTCTTTTCTTTTAGTTTTGACTTAGCTTACAGAGACAACTT  
CA  
AGAGAGATAACCATTATTTTGCCTTTCAGGGAGACCCTATTTCTTAGGGGCACAGCTGATCTCCAGATATGAC  
CATGGGT  
TTGTGGCTCAAACCTTCTGGCCTTTGGATTTGCCCTTCTGGACACAGAAGTCTTTGTCACA

>NM\_011210-Mouse-231MUSLCA3A1\_1chr1-138064683138065383mchr1\_00432  
atgaatctgtgtattggacataggagggttctggggaaaagagagagtggggggaaataatgcaaattcaatatacatg  
tgaaattgatcaggatgtgtgtggtgggtgggaaatactatgatcaaaagaaacaagttaactttgtaaaagacaag  
gcttggtttcatgtcttcttcatgtgtaaatagcacagagcaaccccaatgtaggggactcctgtcttgaagca  
gaattcactgatgcacagaggagagctcactccaccactcaaggagatacctgcataaaactcaatgaaccaccacca  
gcagccctgaaaaaaaattgggaggctctttaaagccagtgaaggtagtttgcataaggaaagccacatcaccaggaa  
ataggcatacatttgagctctgagctccttatggtaataacaggagttggcagacataagcagaaagacagttggttg  
ggtcacttggtcgtcttcaaCGAACTTCAGAGCCTCGTACCAGCTTAGTCACTGTGTTATCTTGCCAACCCCTATGTTG  
T  
TATACTCATGTGGAAGCTTGTGCATATCTTGGGTAAGAAAATTATTGATGACTTGGGAGGGATGTATTGTTTT  
TGAATAAA  
GCTTCCTTAAAAAGATATTTAAAAAGGAGCAATATTTATATAGTTTAAAACTGTTTTCTT

>NM\_011210-Mouse-232MUSLCA3A1\_2chr1-138064323138065023mchr1\_00432  
tgaagtagtttgcataaggaaagccacatcaccgaggaaataggcatacatttgagtctgagctccttatggtaaata  
acaggagttggcagacataagcagaaagacagttggtttgggtcacttggtcgtcttcaacgaactcagagcctcgtac  
cagcttagtcactgtgtatcttgccaaccctatgtgttatactcatgtggaagctgtcatatctgggtaagaaaa  
ttattgatgacttgggaggatgtattgttttgaataaagcttcttaaaaagatattaaaaaggagcaatatttat  
agtttaaaactgtttccttagaggaaaattgagacgaaccgtaacagcataaacttgaattaaggaagtaagaag  
ccattgactgacttgaacgaccttttttttttaacttctgcaaagaggacccttacagtattttggag  
aagtagtaaaacccaatctGACATCACCATTAGCAGTGCATGTAGCTAGCAAGTGGTTTGTCTTAGGGTAAGAGA  
GT  
AGGAACTTGTCCCCATCTGATAAGACAGAGTGCAAAGTATGCGTCTTTTCTTTTAGTTTTGACTTAGCTT  
TACAGAG  
ACAACTTCAAGAGAGATAACCATTATTTTGCCTTTCAGGGAGACCCTATTTCTTAGGGG

>NM\_011210-Mouse-233MUSLCA3A1\_4chr1-138064316138065016mchr1\_00432  
agtttgcataaggaaagccacatcaccgaggaaataggcatacatttgagtctgagctccttatggtaaataacaggag  
ttggcagacataagcagaaagacagttggtttgggtcacttggtcgtcttcaacgaactcagagcctcgtaccagctta  
gtcactgtgtatcttgccaaccctatgtgttatactcatgtggaagctgtcatatctgggtaagaaaattattga  
tgacttgggaggatgtattgttttgaataaagcttcttaaaaagatattaaaaaggagcaatatttatagtttaa  
aactgtttccttagaggaaaattgagacgaaccgtaacagcataaacttgaattaaggaagtaagaagccattgc  
actgacttgaacgaccttttttttttaacttctgcaaagaggacccttacagtattttggagaagtag  
taaaacccaatctgacatcaCCATTAGCAGTGCATGTAGCTAGCAAGTGGTTTGTCTTAGGGTAAGAGAGTAGGAA  
AC

TTGCTCCCCATCTGATAAGACAGAGTGCAAAGTATGCGTTCTTTTCTTTTAGTTTTGACTTAGCTTTACAGAG  
ACAAACT  
TCAAGAGAGATAACCATTATTTTGCCTTTCAGGGAGACCCTATTTCTTAGGGGCACAGCT

>NM\_011210-Mouse-234MUSLY5D\_1chr1-138064717138065417mchr1\_00432  
ataaaagttaaagaataaatggtatgaattagggatgaatctgtgtattggacataggagggtctggggaaaagagag  
agtggggggaaataatgcaaattcaatatacatgtgaaattgatcagggatgtgtgtgggggggggaaataactatga  
tcaaagaacaagttaactttgtaaaagacaaggcttggttttcattgctctcttcattggtaaatagcacagagca  
accccaaatgtaggggcactcctgtcttgaagcagaattcactgatgcacagaggagctcactccaccactcaagga  
gatactgcataaaactcaatgaaccaccaccagcagcctgaaaaacaaattgggaggctcttaaagccagtgaagg  
tagttttgcataggaagccacatcaccgaggaaataggcatacatttgagtctgagctccttatgtaataacagga  
gttgccagacataagcagaaAGACAGTTGGTTTGGGTCACTTGGTCTTCAACGAACTTCAGAGCCTCGTACCAGC  
TT  
AGTCACTGTGTTATCTTGCCAACCCCTATGTTGTTATACTCATGTGGAAGCTTGTTCATATCTTGGGTAAGAAA  
ATTATTG  
ATGACTTGGGAGGGATGTATTGTTTTTGAATAAAGCTTCCTTAAAAAGATATTA AAAAGG

>NM\_173445-Mouse-235mchr7\_P021887chr7-6740572067406420mchr7\_00768  
tctttcttcttttttttttttttgggttttttcgagacagggttctctgtatagccctggctgtcctggagctc  
actttgtagaccaggctggcctcgaactcagaaatccgctgcctctcccgaatgctgggattaaaggcgtgcgcc  
accactgcccagcttttttttttttttttcagtgctgttttttatgctggtcctggatacatttgcatagata  
ttgtgagtttctgtgatctctaccagctgtgtttgaaattggggctcagtgctgcctccctcggggaaaatacatt  
tttctgtaactctgccaggttgaaggagaaacaggactcaaatagattccctatatgggtaggaacaccggtttcttaga  
ggctggagtcaggctggcactcattggctcagtaacagtagacagagcctgggccaatcagtgaggcactagta  
ctacagctcctgtttggccCTCAGTCCTGCGCTTGTTCAGTAGTGAACGACCTCCTTCCTTGTTC AAAGGGAATGGAG  
G  
GTGTCAGGGCTTGGTCTTCGCCC GCCGTTTCCCTCGGATCGTCAAGAGTATCCATTTCATTTCAGTGGTTCCAACC  
GCGTCC  
ACTGCTGTTGGCGCGCACAGGAGACTTCAGCCTACTGCCTGGTGGCAGGTAACCCGGCGC

>NM\_013846-Mouse-236DBTSS:NM\_013846chr13-5232480552325505mchr13\_00630  
tgacttttctagattcccggagggtcctgatcctccaaggggcttggcaggacgcccattggggagcagcagccgctat  
attctggaatctgtgttcgaagaccatacctcatctcactttgggcccaggatttgaagaactgacaactgaatt  
cccctctggggcttcatcaaggagcctagttaattgtgtggtccagggtcccaagttccaggcttctgatgg  
tgggtggcaactgctgcaagagcagatgaaccggaggctccaccttgtgcttagaagtcccggaggcgtggcggga  
gggcccgtgctgcaggcggctccctggacgcagggggcggaccggctcctcccgtcactcgggtcgtgccctgagt  
cactccggcagagggcggcggcggcctctctgcccacggggcggcgagctggggaccctgctcctgcgcgccg  
cccgcgtccgccccctgTGCTCTTCCCGGCGGCCGGCGGGACGCCCGTGCCCGAGCCCCAGAGTCTCTGCAGTGAA  
T  
CGGTGCATCGGGGCAGGGAAAAAGGGACACCAGAGTGGCCCTCGAAGGGGACCAGCCTGCGAAGCGCGAGGAA  
GGAAGAA  
GCGGACGCGTGGCGGGGAGGGTTGAGGCGCCCCGCCGAAGCCCAAAGGCCGAGCGCG

>NM\_013846-Mouse-237mchr13\_P012346chr13-5232414652324846mchr13\_00630  
gggttgaggcggccggccgaagccaaaggccgagcgcggttaggcgaccgggacccacggcccgcagctggct  
ggggctgggtgcgccgagccgtgtcctctgtgcgccgggcccgtctggacggctgaggcgtcctctgacacc  
tggacggcaggttaaggacctgctgcctccgagcattgccgctctccaccactctcggcggcggcggcg  
ccggtgctctcgatgagggggcggcaggcaaggccatgctcgcgctcggcggcagctgggcccgtgcctcagtcg  
cctgggctggtccaatgagctgcttagggaccactaagtgttccagaggccgggtgggagcggcgggagct  
ttcttaagatcacagtcagatgtgcaccggtagacgtgctgtgtgaccaagacctggactccatcgtttctt  
cccaggtcaccgcccgtccaGTCCACATGCATCCCTTGAACCTTGTCTGCCTCCGGGGCAGATGCGGTCTGAGTTAGT  
C



CCTACTAGATCTTTTGTTCCTTCCCTTGCCAACTTTCCTCCAAGCCTTCTCTTGAAGCCCTCCTAGGTTGAT  
CTATTC  
ATTTTATATCTTCCCTTCACTTTTTCTAAGAATGTTGTGCTATAAAAATATTTTTGTTTTTTT

>NM\_009114-Mouse-242MMU250496\_1chr3-9112322991123929mchr3\_00035  
gggaaagagctaccacctctgaggagcttctaactaattccattcaagaacgccatgaggacccctcacctctct  
caaaggagccaggaaaacacatgagaaggctcagaccataaactcaggggatagagccagaatgagatggccacaatgat  
tcgcctgccaccctctgtatattacaagttaggacaaggaaatgaaaggtatcaaatgagcaggtaggctgtctgctt  
aagatttggcggggaggggttagggggaggtggatggaagggagtgagccaactaacagttcccccaaaacaagc  
tccaagcccagggtgggaattcacaacacatcagagctgtgtgaacatttctgccccacccagctccctgactgtc  
agagttaccacactgctcacctgtgaagcaatctccccgagataacatgtatctaacaaggagctgcctataaact  
gggcttactgctcttaccAACATCTGTGACTCTTTAGCCTTGTAAGTAAGCTTCATTTTCCGTGGAGAGGAGTCTC  
C  
CCTACTAGATCTTTTGTTCCTTCCCTTGCCAACTTTCCTCCAAGCCTTCTCTTGAAGCCCTCCTAGGTTGATC  
TATTCA  
TTTTTATATCTTCCCTTCACTTTTTCTAAGAATGTTGTGCTATAAAAATATTTTTGTTTTTTT

>NM\_011315-Mouse-243EP14039chr7-3412340534124105mchr7\_00166  
ctggtaaatcaagtctctagatttctgctgctccctgaccttccatagcaaataggagtatactggagtctggagatct  
tccgagcgttgggtgctaaatgccagcttctgctcccatctctgttccctaaaggctccagcttaacctgaactga  
gcttgaagggcattagcttagccttggattggatcccatgatttatcacacattcatatcttcttctaatattgc  
tcccccccccaagaaactggatataaagcatttcttctgattttccaaccaggatggcgaagacttcagaaagctct  
aactggccacatttctggaatgcttagatggcgcaatctgggaaagaagatgtacatgaaggaaaagttatcttctga  
aagagaaattatgggtaagtgggattatgcaagatcaaacagggtgctccattagtgagtgacagtatatatagata  
tcctcgccacatctctcaGCAAAGGACAGAAGCCACTCACCTGGGGTCCCAGAAGGAGCTCGCAGCACGAGGTGAGT  
T  
GCCAGAACTTTCAGCATTTCCTCTTTGCAGATTCTTTTCCCCGCCAGCATTGCTTGTGTGTTAATGTTCT  
ATCTCT  
ATCCTGAATCCACTAGATGGTTAGAATTCAGTGGATATTATGCTTTCTGCATGGAACCTG

>NM\_011315-Mouse-244DBTSS:NM\_011315chr7-3412340734124107mchr7\_00166  
ccctggtaaatcaagtctctagatttctgctgctccctgaccttccatagcaaataggagtatactggagtctggagat  
cttccgagcgttgggtgctaaatgccagcttctgctcccatctctgttccctaaaggctccagcttaacctgaact  
gagcttgaagggcattagcttagccttggattggatcccatgatttatcacacattcatatcttcttctaatatt  
gctcccccccccaagaaactggatataaagcatttcttctgattttccaaccaggatggcgaagacttcagaaagtc  
ctaactggccacatttctggaatgcttagatggcgcaatctgggaaagaagatgtacatgaaggaaaagttatcttct  
gaaagagaaattatgggtaagtgggattatgcaagatcaaacagggtgctccattagtgagtgacagtatatataga  
tactctcgccacatctctCAGCAAAGGACAGAAGCCACTCACCTGGGGTCCCAGAAGGAGCTCGCAGCACGAGGTGA  
G  
TTGCCAGAACTTTCAGCATTTCCTCTTTGCAGATTCTTTTCCCCGCCAGCATTGCTTGTGTGTTAATGTT  
CTATCT  
CTATCCTGAATCCACTAGATGGTTAGAATTCAGTGGATATTATGCTTTCTGCATGGAACCT

>NM\_011315-Mouse-245MMSAA3G1\_1chr7-3412342434124124mchr7\_00166  
gttttattgttagtgcctggttaaatcaagtctctagatttctgctgctccctgaccttccatagcaaataggagta  
tactggagctggagatcttccgagcgttgggtgctaaatgccagcttctgctcccatctctgttccctaaaggctc  
cagcttaacctgaactgagcttgaagggcattagcttagccttggattggatcccatgatttatcacacattcata  
ttttcttctaatattgctcccccccccaagaaactggatataaagcatttcttctgattttccaaccaggatggc  
gaagacttcagaaagtcctaactggccacatttctggaatgcctagatggcgcaatctgggaaagaagatgtacatga  
aggaaaagttatcttctgaaagagaaattatgggtaagtgggattatgcaagatcaaacagggtgctccattagtgga  
gtgacagtatatatagatatCCTCGGCCACATCTCTCAGCAAAGGACAGAAGCCACTCACCTGGGGTCCCAGAAGGAG  
C

TCGCAGCACGAGGTGAGTTGCCAGAACTTTCCAGCATTTCTCTTTGCAGATTCTTTTCCCCGCCAGCATTTGC  
TTGTTG  
TGTTTAATGTTCTATCTCTATCCTGAATCCACTAGATGGTTAGAATTCACTGGATATTAT

>NM\_011315-Mouse-246MUSSAA3A1\_1chr7-3412340634124106mchr7\_00166  
cctggtaatacaagtctctagatttcgtctgctccctgaccttccatagcaatatggagtatactggagtctggagatc  
ttccgcagcgttgggtgctaaatgccagcttctgctcccatcctcctgtccctaaggctccagcttaaacctgaactg  
agctttgaaaggcattagcttagcctttggattggatcccatgattatcacacattcataatcttcttaataattg  
ctcccccccccaagaaactggatataaagcatttctgtgattattccaaccaggatggcgaagactcagaaagtc  
taactggccacatttctgaaatgcctagatggcgcaatctggggaaagaagatgtacatgaaggaaaagtatctctg  
aaagagaattatgggtaagtgggattatgcaagatcaaacagggattgctccattagtgagtgacagtatatatagat  
atcctcggccacatctctcAGCAAAGGACAGAAGCCACTCACCTGGGGTCCCAGAAGGAGCTCGCAGCACGAGGTGAG  
T  
TGCCAGAACTTTCCAGCATTTCTCTTTGCAGATTCTTTTCCCCGCCAGCATTTGCTTGTGTGTTTAATGTTC  
TATCTC  
TATCCTGAATCCACTAGATGGTTAGAATTCACTGGATATTATGCTTTCTGCATGGAAGTT

>NM\_011519-Mouse-247DBTSS:NM\_011519chr12+88082978808997mchr12\_00016  
tgggaaccatacatcgatccctcggttatatagcctcatcgctgtggggctccgaggttcccccaaatcttgctc  
acctggaggaccctgggtgctcgcagagggcgctgcagcctcgacgtagagaactaacaatcgcccttctccag  
ggcagtgctccggactccggaccaggacatagtagcagtgacactgggtctccgtcagctacgcatcaaggaaggtgc  
gacgcgggaattacagattccggcactcaccagtgctcaggggaggaaggtgggactcagacctgcaagagctgaagag  
tgggtgggcttcgatcctaggaggcgtggaaggggtgtggctggatccctgggggtggggcgctccaagggcgggg  
caaccagggggcggggcccaggggtggagattgggactaccagggcccggagctgggggtggggcgctagtttgc  
aactcgagagccttgggtTATTATAAGGCGGAGCTCCGCGGAGAGGTGCGGGCCAGAGGAGACAGAGCCTAACGC  
AG  
AGGAAGGGACCTGGCAGTCGGGAGCTGACTCCAGCCGGCGAAACCTACAGCCCTCGCTCGAGAGAGCAGCGAG  
CTGGGCA  
GGAGCCTGGGACAGCAAAGCGCAGAGCAATCAGCAGAGCCGGCCCGGAGCTCCGTGCAAC

>NM\_011519-Mouse-248MMSYNDE1A\_1chr12+88083108809010mchr12\_00016  
tcgatccctcggttatatagcctcatcgctgtggggctccgaggttcccccaaatcttgctcacctggaggacc  
ctgggtgctcgcagagggcgctgcagcctcgacgtagagaactaacaatcgcccttctccagggcagtgctccg  
gactccggaccaggacatagtagcagtgacactgggtctccgtcagctacgcatcaaggaaggtgcgacgcgggaatta  
cagattccggcactcaccagtgctcaggggaggaaggtgggactcagacctgcaagagctgaagagtgggggtgggcttc  
gatcctaggaggcgtggaaggggtgtggctggatccctgggggtggggcgctccaagggcggggcaaccagggggg  
ggggcccaggggtggagattgggactaccagggcccggagctgggggtggggcgctagtttgaactgcagagcct  
tgggttattataagggAGCTCCGCGGAGAGGTGCGGGCCAGAGGAGACAGAGCCTAACGCAGAGGAAGGGACC  
TG  
GCAGTCGGGAGCTGACTCCAGCCGGCGAAACCTACAGCCCTCGCTCGAGAGAGCAGCGAGCTGGGCAGGAGCC  
TGGGACA  
GCAAAGCGCAGAGCAATCAGCAGAGCCGGCCCGGAGCTCCGTGCAACCGCAACTCGGAT

>NM\_011519-Mouse-249MUSSYND1G\_1chr12+88082688808968mchr12\_00016  
gggtcccctatcctcagcccgtggggaggtgggaaccatacatcgatccctcggttatatagcctcatcgctgtggg  
gctccgaggttcccccaaatcttgctcacctggaggaccctgggtgctcgcagagggcgctgcagcctcgac  
gtagagaactaacaatcgcccttctccagggcagtgctccggactccggaccaggacatagtagcagtgacactgggt  
ctccgtcagctacgcatcaaggaaggtgcgacgcgggaattacagattgccggcactcaccagtgctcaggggaggaag  
tgggactcagacctgcaagagctgaagagtggggtgggcttcgatcctaggaggcgtggaaggggtgtggctggatccc  
tgggggtggggcgctccaagggcggggcaaccagggggcggggcccaggggtggagattgggactaccagggccc  
cggagctgggggtggggcggtTAGTTTTGCAACTGCAGAGCCTTTGGGTTTATTATAAGGCGGAGCTCCGCGGAGAG  
GTG

CGGGCCAGAGGAGACAGAGCCTAACGCAGAGGAAGGGACCTGGCAGTCGGGAGCTGACTCCAGCCGGCGAAAC  
CTACAGC  
CCTCGCTCGAGAGAGCAGCGAGCTGGGCAGGAGCCTGGGACAGCAAAGCGCAGAGCAATC

>NM\_011519-Mouse-250MUSYND1G\_2chr12+88082998808999mchr12\_00016  
ggaaccatacatcgatccctcggtttatatatagcctcatcgctgtggggctccgaggtgccccaaaatcttgctcac  
ctggaggaccctgggtgtcctcgcccagaggcgctgcagcctcgacgtagagaactaacaatcgcccttctccaggg  
cagtgctccggactccggaccagacatagtagcagtgacacctgggtctcctgtagctacgcatcaaggaaggtgcga  
cgcggaattacagattgcccgcactcaccagtgtcaggggaggaaggtgggactcagacctgcaagagctgaagagt  
gggtgggcttcgatcctaggaggcgtggaaggggtgtggctggatccctgggggtggggcgctccaagggcggggca  
accagggggcggggcccaggggtggagattgggactaccagggcccggagctgggggtggcggtagtttgc  
ctgcagagcctttgggtttaTTATAAGGCGGAGCTCCGCGGAGAGGTGCGGGCCAGAGGAGACAGAGCCTAACGCAG  
AG  
GAAGGACCTGGCAGTCGGGAGCTGACTCCAGCCGGCGAAACCTACAGCCCTCGCTCGAGAGAGCAGCGAGCT  
GGGCAGG  
AGCCTGGGACAGCAAAGCGCAGAGCAATCAGCAGAGCCGGCCCGGAGCTCCGTGCAACCG

>NM\_011519-Mouse-251MUSYND1G\_3chr12+88082928808992mchr12\_00016  
ggaggtgggaaccatacatcgatccctcggtttatatatagcctcatcgctgtggggctccgaggtgccccaaaatct  
tgctcacctggaggaccctgggtgtcctcgcccagaggcgctgcagcctcgacgtagagaactaacaatcgccctt  
tccagggcagtgctccggactccggaccagacatagtagcagtgacacctgggtctcctgtagctacgcatcaagga  
ggtgcgacgcgggaattacagattgccgcactcaccagtgtcaggggaggaaggtgggactcagacctgcaagagctg  
aagagtgggggtgggcttcgatcctaggaggcgtggaaggggtgtggctggatccctgggggtggggcgctccaaggg  
cggggcaaccagggggcggggcccaggggtggagattgggactaccagggcccggagctgggggtggcggttag  
tttgaactgcagagcctttGGGTTTATTATAAGGCGGAGCTCCGCGGAGAGGTGCGGGCCAGAGGAGACAGAGCCT  
AA  
CGCAGAGGAAGGGACCTGGCAGTCGGGAGCTGACTCCAGCCGGCGAAACCTACAGCCCTCGCTCGAGAGAGCA  
GCGAGCT  
GGGCAGGAGCCTGGGACAGCAAAGCGCAGAGCAATCAGCAGAGCCGGCCCGGAGCTCCGT

>NM\_011519-Mouse-252MUSYND1G\_4chr12+88083278809027mchr12\_00016  
atatagcctcatcgctgtggggctccgaggtgccccaaaatcttgctcacctggaggaccctgggtgtcctcgcca  
gaggcgctgcagcctcgacgtagagaactaacaatcgcccttctccagggcagtgctccggactccggaccaggaca  
tagtagcagtgacacctgggtctcctgtagctacgcatcaaggaaggtgcgacgcgggaattacagattccggcactca  
ccagtgtcaggggaggaaggtgggactcagacctgcaagagctgaagagtgggggtgggcttcgatcctaggaggcgtg  
aaggggtgtggctggatccctgggggtggggcgctccaagggcggggcaaccagggggcggggcccaggggtgga  
gattgggactaccagggcccggagctgggggtggcggttagtttgaactgcagagcctttgggttattataagg  
cggagctccgaggagaggtGCGGGCCAGAGGAGACAGAGCCTAACGCAGAGGAAGGGACCTGGCAGTCGGGAGCTG  
ACT  
CCAGCCGGCGAAACCTACAGCCCTCGCTCGAGAGAGCAGCGAGCTGGGCAGGAGCCTGGGACAGCAAAGCGCA  
GAGCAAT  
CAGCAGAGCCGGCCCGGAGCTCCGTGCAACCGCAACTCGGATCCACGAAGCCCACCGAG

>NM\_011519-Mouse-253mchr12\_P000504chr12+88237328824432mchr12\_00016  
gctgcttgccttctcccgagtgggcgtcaatccctagacatcttaagcctggccacacggtcctggaaggacca  
ggtcagaagtatactagatggcctgtgagcctctcgaacacacagggtgtaaatagtagctgattgtacattgg  
agactcgtcagtgagggtgagtcctggtcagagggttattctccccacatttcttctctgggctgaagtc  
tcttcttcttacctgtgatgtcatgataggtcccagctgagagtgaggcggggagtcagggagctgcttctct  
ttgcttagcaggggtggagactgggggtgaggggtggctcccccttccctgacctgggttctggttctcag  
cagagattcgttagaagcttgtgcgtaaacaaagatcacaagcgataagcttgagcaaacaccaggggaacaaattg  
cttccctgtaagaccaatCTTAGCTCTTAGAGAAGCCCTCCCTTTTGGGAAATTGCTGACTTTCAGGGCTTCTCTGT  
G

GAGGAAAGAGGCTAGCCGCCGTATGTTTGCCTGGATTCCAATAAATCTTTGCGGCCTTGCTACCCCTTGTG  
AACAAGG  
TCTGCACTCCTAATGCGTGCCTCAGGCTGGTCTGAGACCTTACCCCATCTCCAGCTTTC

>NM\_177879-Mouse-254mchr5\_P013153chr5+139508218139508918mchr5\_00501  
ggccattgtgtatacaagatgcatgaggagtcccaggaggccttcatctcttctgttgccttttgccttggagttg  
gtgagctccagatttagtgagagaccctgtctcaaaaagtacaatgaagagtggtagataaagacatccaacatcaacct  
ctggctctcaaacacatggatgtgaacatgtagacgtgatgaaccagtggtgactgcgcatgactagaaagt  
tctaagaacatgctctccatgaagttagccataggatgggtttattcttgacgacctcaagctggcagttatggt  
atccactcatgccagcctgtcttcttccagcctctgctgattccagtaacaatgggaaccctgagctgtgggcta  
cagggtagaagtattggcgttctgaccaacctcgtcagctctggccaagttgtcagtgacctctggagaggagctga  
ccatcgaggaactggaggagTGGACAGAGTACGAGTTGCGGATGCAGGCCTTCAACGCCATTGGGGCTGGGCCCTGG  
AGT  
GAGCTGGTGCGGGGCCGCACGCGGGAGTCAGGTGAGAGGGAGGTAATGCAGGTATGGAGACAAGGTCCCTCT  
GTGTCTC  
TGTAGAAATGGTGTTTGGTGGCCTTGGATTTCCATGTCCCTGGGTAACAGAGTCTCCCA

>NM\_177879-Mouse-255mchr5\_P013168chr5+139586697139587397mchr5\_00501  
agatcagggatgtagcaaggggagactggacatggctgacgttaggcactcagaggagaccggaagcctagtgaggatgct  
tgtaagggtagccctacacactcctcctgcacaacctgatgaatgaacaagccccacatgactgcacccccggctct  
gtacatgccaacagccttgaggagtggcaggttctcctgtctccgctgactggctctgtgaaccagagatca  
ggggaattccgagttgaagaatcagtgatagcagtcaccaccactgccaccacacaccactgtcacaccaccacc  
ccaaccaccacactcactcccaccaccactacaaccacaacacggccccattccccatccccacccccaggtg  
agaagggtagaaggagaagggagaaggggaagatagatgaaatggggagggaggaggaaaggtgaagtatagaa  
aggagaaagggggaagagaGAGGCAAAATGGGGAAAGATTGGGGAGAAGAGGAGGGGTGGGAAAAGAAAGGG  
AGGTG  
AGAGGAAACCCATGCACCATGGTGTTCCTCTTCCCTAAAAGCAGGGCCCAGCATCCCCAAAGCCTCTGGAG  
ATGGAGC  
TGCTGCCGCCACTTTATCGTCTGTTACATCTGCAATTCATTCTGGTCTTCCAGCTCACA

>NM\_177879-Mouse-256mchr5\_P90084chr5+139279270139279970mchr5\_00501  
aggttctcacatctgtaccatcaaacctcacagttatcttctgcccgtatgctcttcttctcctggttaccctca  
gggctgctctgatgggagtgtcaggcatcctgaactgactcagggtgccgaagcttcttgaatacaggggtgatc  
aggcacatgggtagcaagcagggtgtgacaacctgtaatagctggttagaaagagacctgtaaaggaactggcaatt  
tccaagagctggctgctcagcactcagccctgcaactgcttaagcccactacatggctcaagttacctataactca  
tcctcccacttaggagagaaggcagaacaggtgactgactgcgcatgctgtaactggtctttatattcacataccc  
ttaggaactctgagctcagcttctgcctcagccctgcccactctggactctgccctggcccctctggttctcag  
tgagcttgggctgctgctATTTTCCCCCTCAATTCTGACTCCAGAGCTTGCTCCTAAGAGTGCCACAATGTTTGTGT  
C  
CACAAAGGAGCCCACTCCAAAGACAAGCTAGCAAGTGTCACTGAAGATGTGAAGTTTTGCAGGTCGCAGGCTG  
AGAAGGT  
GGGTCATGCTCAGTGAAGATGGACAATGGTGCATACACAGCATGCTGGGCGATGGAGAGG

>NM\_011407-Mouse-257mchr11\_P009856chr11+8272909182729791mchr11\_00181  
ctagaaaatgagaaattctgatgagcaagtggttaaggtccaaaactgcaatgatgtccaataggtgtgaaggga  
ctggatacaagttgtggtgagatcaagtttaggttcaggtcttaggcaccatttcttctgaggtcccagaagctc  
aggaacataagagtggcgggaaagtcagaagataacagaatgaatgtggcattgtcctaacaacagatgtcaca  
atccaaaccaactgcaacaattaacattcactataggtgtaaggtgggtaggaagtagggcatctgttactg  
atccatttccctgaactggggtgcttgagtaaggtgctggagtcacccccagctccacacctgctgaggctgatg  
gtggagaggcaccacagctgggttctgagggacctctgctgctccctgctcctcctcctatcactttccaggc  
ttgctcttctgctcactccCTTCATTTTCTCTCTCAACTCTACAGCCTTGCTTTTCTTCTCATAGCTGGCTTTTTG



GATCTAAAATGCACTGAGCCAGGGAACTTATATTACCAAATTATCAAAAGAGAGGGCACAAAGAAAGAGC  
TGGTGAGT  
CTTGTCCGCTTGGGTTGCCCTTGAACCTCCCATAGAAACCCATCTTCCCAAAGAGTTAG

>NM\_011407-Mouse-258mchr11\_P009857chr11+8272967082730370mchr11\_00181  
cagggaaacttatattacaaaattatcaaaagagagggcacaagaaagagctggtgagcttgcctgggttgc  
cttgaacctccatagaaacctatctccaaagagtaggatgagcttgaccttgtagccagcatcctactct  
gcctcccctggctcagcttccctccaatcatcttccctggagaggctcaacaggtgctatgctgtgcctagt  
tcacgtctcttctgagggtcaggacagcagcagccgagcttgcctggggatttgagtacgctgtaaggttaagt  
tcaaaagtctagaagccttgttctcagttctgacaggtggagtggaatcacagaggggatgaaagagctgaaggagat  
gtctcacacttctggagtacatcaaccaatgaaaccggggttctccaaactgaaatcgggacctagagaggtgaaa  
cagtcaatccactaaggtcGGTCAAGACAAAAGCCGAGAGCAACCACAGGCACTGTAGCTCATCCCTCAAATCCAAG  
TG  
CTGAGAAGGACTTCTGGAGACAGCCACCACTCCCCTGCTGTGGGTGTCTCAAGCTTTTGCCTTACTTCTCTG  
GCCCCG  
AAGTGTCCACAGCACAGCTAGCTCACAGCTAGCTCGCAGTTGACTTCAAGCAGCTGAGGG

>NM\_011410-Mouse-259mchr11\_P90078chr11+8277776482778464mchr11\_00437  
gcgctggcttatccactgcgttcggggcagagtaaggacctgaacatcatctctttctgcctgatacagctgaca  
ggcagcctgcatttcttcagagagatttccccccagagtaacatgctacaattgagaagaaggaactacctagttaa  
taaaaccaaggaaccaggaggtctctgaacctcactcagcttggatttgatgagtttgcctcccttgcattt  
aagtaccatgtccatactgagtgctgaaggtaactgggtatgaacagtttccatagttgaggtttgaaactgagatggc  
agtgtcccaggttagccacagctcctgtaaaggggactccaatgtagcatcattgactttaagtttccagaggcctg  
agcattgtcctttgcactttgggtgtagatgtgatttctctcttccatgtgctgtgtaacctggcatgctggct  
taggacatggcctgattcagGGGGTGCTGAATGGGTGGGGCTGAAAGGGAAAGAATAATAGAGACCACATAACAGTG  
TAT  
GGAACAGGGTGGGGCTGCAGCATCTAACTCTCTCTCTTCTTTGCCTGCTTGCCTTGTGGGACTGAGCAACTG  
CTAGAT  
CCTTAGATTTCCATTACAGCTGCTGCTGACCACTGTTGGGAGTTGGACTACAGATTGTA

>NM\_011414-Mouse-260DBTSS:NM\_011414chr2-164419442164420142mchr2\_00382  
gttgggtgagccatgcgtcatcttcatctcgagaaggaattgtattgagcaataggttagagtttcaaatcccagaaa  
gtccaggaacattaaaaaaaaaaaaaaaaatagaggtgatggcagagttcagccgagagtcacgtgtgatgctcagctt  
caggttaggtaaccctttgtgactggttctctactagtgagagcaatagcttgggattcacaatgctcagggc  
tcaggtgatcactgcaatgctcctctgctgataactccaagacagcttctgtcatttctcagctctcaggtggttact  
tgatggcctcatggtcctgcctgaaacagaaagtctgccactacttctgtagcagcaagactcctgttctgtgtaag  
cttctgctgtgcaagagccacagggaggggccaatgcatgccactggggccagcctcctgtaagacataaatag  
tgatcctcgggactggtcatCAGAGCTCCCCTGCCTTACCATGAAGTCTGCGGCCTTTTACCTTTACGGTGCTCCTT  
GCTCTGGGGATCCTGGCACCTGGACTGTGGAAGGAGGCAAAAATGGTGAGTTGGAGTTGCTTTGGTCCAACA  
TTGCCTG  
GAGTATCAGAGGTGGGGGCTCCTGATGGTTTGGGCTGTTTTTCAGTTTACTCTGACCTCA

>NM\_011414-Mouse-261AF002720\_1chr2-164419441164420141mchr2\_00382  
ttgggtgagccatgcgtcatcttcatctcgagaaggaattgtattgagcaataggttagagtttcaaatcccagaaa  
tccaggaacattaaaaaaaaaaaaaaaaatagaggtgatggcagagttcagccgagagtcacgtgtgatgctcagctt  
agggttaggtaaccctttgtgactggttctctactagtgagagcaatagcttgggattcacaatgctcagggct  
caggtgatcactgcaatgctcctctgctgataactccaagacagcttctgtcatttctcagctctcaggtggttactct  
gatggcctcatggtcctgcctgaaacagaaagtctgccactacttctgtagcagcaagactcctgttctgtgtaagc  
ttcctgctgtgcaagagccacagggaggggccaatgcatgccactggggccagcctcctgtaagacataaatag  
gatcctcgggactggtcatcAGAGCTCCCCTGCCTTACCATGAAGTCTGCGGCCTTTTACCTTTACGGTGCTCCTT  
G

CTCTGGGGATCCTGGCACCTGGACTGTGGAAGGAGGCAAAAATGGTGTGAGTTGGAGTTGCTTTGGTCCAACAT  
TGCCTGG  
AGTATCAGAGGTGGGGCTCCTGATGGTTTGGGCTGTTTTTCAGTTTACTCTGACCTCAG

>NM\_011414-Mouse-262mchr2\_P90239chr2-164435858164436558mchr2\_00382  
gtttcaagtcaacagagacaaatactttttctttttgatgagtgtaggaggtcgggacttcgaaaagac  
aattagagtaagcacttgaaaggacagccaataaactttaagaacaaggagactcaagataagttagttgctagcagcct  
aattctaatttataaacttgaggggctaggagtactaacttacacacacacacacacacttagaataaaaaggtgt  
taccatctatacaagaagatgtttggcattggttatgacccatggcactgcttagaagaagccagaagatgaccacagt  
tactggttgattgccaggggaagtgggttggttaacagggagattgatttctgagggcagttctctggttggtg  
ccccaacgggaggaagtggtagggcaagagcttagagcatcctgtggcatttgattcctttgttattaatgatctgg  
aagcaccagaggccagtttGGATGCCAAACCCCTACCTAACAGAAAGAGAAGAAAGGCCACTGCCTAAGGGATGCAA  
GG  
GAAGGCATGCATTTCAACTGTGAAGAGTTCCCCACCCCTCTGAGAATCAGTGGGAAGTCACCTGCCTAGTC  
ATGCCGG  
GAAGGCAACTGCCTGGCACTTCTATTTTCAACAGTTTCGTTCCACCATCCATCTCTCTCTT

>NM\_011415-Mouse-263DBTSS:NM\_011415chr16+1442178414422484mchr16\_00037  
cagcgatcagcaagtaacttttggcacgcccttagacctgctgtggcagctcggggagcctttaccttctttcc  
caaaagccagagcctacagctgctgtgtgcaataacccccctccagacgcaactccaatatagactctctggccact  
aggggctgcgcggtcccagctccggaggccgccccttcccgcctcgcctgcccagcactgccacatctggaagc  
caagtcgcttaggtcacctagcggaaacagtttcccagtgctcaagaaccgagatttcttcttgaaaacatttaa  
tgtattttgagcctccactgaaatgccatgagcagcccatttgaaccagaaaaatttagtctgacaacagagcttctc  
ctattcacagctgtccagaaggaggagctgaaatctgaaccttggctgtgattggttacttctagaaaaagcaacgg  
agaaggcgcctccccgcccaGAGGAGCTCAGTCGGGCAGGGAGCCGGGTGACTTCAGAGGGCCCTGCCTGTCCCCCG  
CG  
CACCTGAGCCACCGCATGCTATAGGACCGCCGCTGGACCGTTATCCGCCCCGCCCCGCCCCGAGCCACCATG  
CCGCGC  
TCCTTCCTGGTCAAGAAACATTTCAACGCCTCCAAGAAGCCCAACTACAGCGAACTGGAC

>NM\_009238-Mouse-264DBTSS:NM\_009238chr13-2833318028333880mchr13\_00409  
tcttgggtgaaaagaactaataaaataatcactcggctttaagcagaagcttcatttacagtattcaccttac  
ccccctcaagcccctgttatctaataatggctagaatacatttccgtctctccccttaataactcatgcattaa  
catctcttcacacatgcgcgtgctgctgcgcgcgcgcgcgcacacacacacacacacagaggcaaacgcgcgc  
gcaccagcaaaaggcggaggtgggggggaagaggcagcaaatctcagctgtacttctagccctttaaaggttg  
ctctgtaaattggaatgaggtcagatttggagcttctcattgcacgcggagattattgcatcgggtccaagccaat  
gggaaggacgggggaggggcttggcacgaggaagcgttagttacagcggctgattggctgtctgagaaaggataaagaag  
cgcgaggcgggaattggggtcTGCTCTAAGCTGCAGCCAGAGAAACAGAGTGAGGGGAAGAGGGCCGTCTCCCTCCCG  
TT  
TCCAGTTCTTGACGCTGTTTCTTAGAGAGTCTGCAGTGGGGAACTCTGCCGTAACCAGCTCCCTTCTTGC  
AGGAGG  
GAGGGAGAAACATACATTTATTCATGCCGTCTGTTGCATGCAAGCTTCTTGGCTTCTTA

>NM\_009238-Mouse-265mchr13\_P014448chr13-2833875128339451mchr13\_00409  
cagggtctttggtccttgccgacccccaccatcctatgcccgagcgcccccagcgaatgtgtgtctcgggtgctg  
ccgcacgcgcggttagccgaaggtgaaaggctgggaaaaaggaaccctagtccaggcagaaccgccaccgggcccag  
tgctcgtggcgagcagttcctcccctcctgactcccacttggcagccacccaatcgctgctcggcctctgc  
agcagcacacacgccttcgacttgcctcccctctattctctttctgacactcgtggctcatgaccactctcca  
gcggttgcccttggctcccgcctcttagcctcaagtggtctcctcgttcctaatatttggggaactctagg  
cggctttttttccataatcgtaatcatttgcttgcctcctgggactccaaactgtaattgcttttacgtgtctgtg  
gtctcaggacaaggaatccACTGAGAGATGGTTTGGGGGTGCTGGGCTGGGAAGAGGATGCTCTATTCCGATTCCGA  
GT

ACCGTTTGC GGGGTGGGGGCTGCAAGGAGGAAAGTGC GCTCAGCCTTTCCTTTATCCACCCTCCCCCGTCGCC  
CTCGGC  
AAGGGCTTTGGGGCGCCTTCGAGGTCCTCTGTGGACACACAAACACCTCAATCTTCCTGA

>NM\_009238-Mouse-266mchr13\_P014454chr13-2833758028338280mchr13\_00409  
ttacagtaggaaagactttcctccgaaaagcaccaccggagtcgattgcaattagctcctccagtaagagtcacagag  
aggcaaggcgaggccggtgcaccgggagtcctaggcgagcttgggcaggaccctgttgctgagctccacggggcggcg  
tgccgggctacgaaaccatttctttcaggagcagggttggccttgggactcctgtggtcatgcaccgtgttctg  
ccgcccggaagcagagcgcgagctggcgagaaaccgattctcgtcctaccgccggggagatgacccgtgacc  
tcccagtgaggtaccagatccgaaaggcgctcctggctccccagccatgggggtgaggggtgggggtgggagg  
tgggctggagaggtcggacgagcaaacaggagcagcaatcggtaccctaaacttcttacggggaatgggggatg  
ccgaattcaccagcacacCCACCGTCTTGAACCCGGAGAAGTGTGGGGGTTACTGGTTCAGGAGACCAGGA  
AG  
GGACGGTTGGATCTTCCCCACGTTTCCCACGTCGCTGCATGCTCAGGCAGGCTCAGCGCTGCCACCTGGCGG  
CTGCCT  
CTCCCGGACTGGGAGGAGCTGTCTGCACGCACCAGTTCACAGATCTTGAAGGGTGTGCC

>NM\_009263-Mouse-267DBTSS:NM\_009263chr5+101803957101804657mchr5\_00857  
actgtggcccggccaacctaagctaccgaatacaaaaggcaaaaggagggtctgaaagttctccgagacagcagtttt  
tagatttaagtaagtctgagagaatcaaattgtgtatccatgtggccttatctgtaacttagataggagaatccatacc  
ttcatccccattgatgttttctactaattcagtaactataaacaagctctgtgagggtagtactcttctttcc  
ttatggatcccgtatgctctccgggattcctaaatgcagctataaatgaaaaggtagttaatgacatggtcatcag  
aatgcttgtgtgtttcttttctcttttttttttaaccacaaaaccagaggaggaagttaggagcaggtg  
ggccgggtagtgcaaaaacctcatgacacatcactccacctgattggtggagactgtctggaccagcatttaatt  
ctgggaggtctgagccaccaGCAGCTCACACTGAAGAAGCATCCTTGCTTGGGTTTGCAGTCTTCTGCGGCAGGCATT  
CT  
CGGAGGAAACCAGCCAAGGTAAGCCTGCAGTGGCCCATGAGGCTGCAGTTCTCCTGGCTGAATTCTGAGGGTG  
AGTCCAG  
AGAACATTCTTTCAACAGTCGTATTTGTTAGTCAGACTCGTGCTGTTCTGGTCTTTTTGA

>NM\_009263-Mouse-268AY220127\_1chr5+101803956101804656mchr5\_00857  
cactgtggcccggccaacctaagctaccgaatacaaaaggcaaaaggagggtctgaaagttctccgagacagcagtttt  
ctagatttaagtaagtctgagagaatcaaattgtgtatccatgtggccttatctgtaacttagataggagaatccatac  
ctttcatccccattgatgttttctactaattcagtaactataaacaagctctgtgagggtagtactcttctttc  
cttatggatcccgtatgctctccgggattcctaaatgcagctataaatgaaaaggtagttaatgacatggtcatcag  
taatgcttgtgtgtttcttttctcttttttttttaaccacaaaaccagaggaggaagttaggagcaggt  
ggccgggtagtgcaaaaacctcatgacacatcactccacctgattggtggagactgtctggaccagcatttaatt  
tctgggaggtctgagccaccAGCAGCTCACACTGAAGAAGCATCCTTGCTTGGGTTTGCAGTCTTCTGCGGCAGGCAT  
TC  
TCGGAGGAAACCAGCCAAGGTAAGCCTGCAGTGGCCCATGAGGCTGCAGTTCTCCTGGCTGAATTCTGAGGGT  
GAGTCCA  
GAGAACATTCTTTCAACAGTCGTATTTGTTAGTCAGACTCGTGCTGTTCTGGTCTTTTTG

>NM\_009263-Mouse-269MMOESTEOP\_2chr5+101805031101805731mchr5\_00857  
agatacagttatttttagaaaactgtctcacttcaaaagagaaccttcttaatttctcgtctgactggcttttac  
agttttcactaaggctccctgtgtgataacacagactcatcaaatgcacagaaaagctgttgcctctcagttttta  
ttttattattattattattgttattattattattattatttagtccaaatagaacatcttactcaaatcaagata  
tctttgttcttccagcttgtataatgtaagttaaatcacattgaaatgcaaatggaaaagcaatttcttttatc  
attctatttcttttcttcttgcagaaagtactctcatggtagttcgttcttaattactcattactgtgaaac  
aaatcttgggtggagctctagagacatcagatagtgggggcataagctctgagactccagacgtaaagttggatgaat  
agagttgtgaaattgcccttTTCCTTGCTAAGGATGAGAGGTGGAGAGGTAGAAAAGGCACACAAATATTGACTCACT  
GA

AATTTTCTCTGAGATGTAGAAAGATTCCATAAATTATTGGTGACTTGGTGGTGATCTAGTGGTGCCAAGAGT  
GTGTTTGA  
ACCTGACAAGACATCAACTGTGCCTCATAAAATATGTTGCAGGACTAACTACGACCATGA

>NM\_027399-Mouse-270mchr5\_P028982chr5-57558295756529mchr5\_00402  
cttgtgaccaccacaccgaggtatcatctgacctccacgtgtgtatcataatattcattcatagctacaataaaca  
taaaccgggtgtaaagtactcacaactcagattcatctctgactgtcctaacagctagctgtgagaaactgctc  
tgttgaagagcgtccaccgaggcggcgtaatcgctacagagcagttggctccaagtgtgggatccaggatcactac  
agcgtcgccggcaacaggcgaatgcacaactgcagatttcgaccaggtcccagtcggttccagtgcctgctggt  
gacctgggtccccctgcacagccaaggattcgccccggcgacgccctcccacggcggcgagcgaagcccctggg  
tgtgagcaggagctggtctccggcaggggctgtgctgcgcggcggccgaggggctgctgagcgggctgtgct  
gggcagcagattcgggctcCGCTGGGACTGGGAGTCCGTCCGGGCAGCGAGCGCCTCGCGTCCGGTCCCACGGAG  
AA  
GCCGGTGAGTCCCGAGTCTCGTTCGCAGGCCGCTTGCTCCCCGCCTCCGCGGGCCTTGGGAATCTGCTGCGGGC  
CGGGGA  
AGGGGTGAGCGGGTCTCAGGGGCGGGCGGTGGTGTCCGGGCAGCGGGGCGCCCCTTCG

>NM\_019418-Mouse-271DBTSS:NM\_019418chr17-5552475255525452mchr17\_00701  
cttctaactgaaccccaagtctcagatctgggaggtgtctgatggggtaaggtccaagctgaagattggggaca  
aggtggtatctgaaatctacccagcaccgtctccagtgacacacatatgaacacatctgagttcatgtgtcatgt  
gctaatagatgatagactgtagtgtgtgtgtgtgtgtccatataggacctgcacacacatcaggaaatgctg  
tgtgcttggccagcactgcagacacatatcagaacatctacacctgtgtgcacacatccacgaacctgtcatctgtac  
aagcactgcacccatgtcacagactaaagcaaacacagaggcctctgctgtcagcgcgtgcaaatgcaggtgcggg  
caagatgctgtgatggaaccacagaagctcctctgagggaaacaaaagccaccaagtacatcgagcaggggctgccc  
atccatcccactgagtcacATTTTCTGGAAAGTGTGAGCTATGGTGGCCTCAGTGAGAGTGATCGACCGGGGGCTGG  
GC  
CTTCTGGGGGCACAGGAAGAAGAGGAGGTACGTGAGGAAAGGGGAGGCCACAGACTTCAGCTTTAAAGTGAG  
TCCTAGGG  
GTGACAGGAACCTTTTGCAGTTTGCACAGCCCCGAGCGTGTGGGCAATTGTGGTTTCCTC

>NM\_177839-Mouse-272mchr1\_P016503chr1-160154335160155035mchr1\_00385  
ggagagcctggccaaatgccttggtcactcatcactgagcctaggtaccctgccatttctgtacacgagttcaca  
ccagcagtgctggtccagctccattctccaggataagatcaagtcacactgctctctcctggagcactggaaccaa  
caaccaatgaggaccatttaaagtcctttatagaaaaacaaaacaaacaaacaaacaaacagcaaacgctagtc  
atcactattcacaaggaaggaaccccttttaggcaacaaaagagaagctgagattggctcaagtagaaacatttc  
ctcacaagacccataagatccagaaaatgtcagccatctctgactagctccaaggaaggagacctccagcctcacc  
catgtcttcttctggcagatctgagccgtcactgcagtgccacgggacctctcctcctgagacctgcagctgccac  
tgtgaccagggtgggaggCGCAGACTGTGATCAGCCACCTGTCTGGGGCTTGCAACGGCCACGGGCGCTGTGTG  
GA  
TGGGCAGTGCGTGTGTGACGCGCCCTATGTGGGGTTCGACTGCGCCTACGCCCTGTCCCCAGGACTGCAGTG  
GGCATG  
GCGTGTGCGTGCAGGGTGTCTGCCAGTGCCACGAGGACTTCACAGCAGAGGACTGCAGCG

>NM\_031254-Mouse-273mchr17\_P006464chr17+4652150946522209mchr17\_00567  
tgggtaatagacacagttaacccttctgaggacctctgctatctggacctggatttaggaaacccttagccc  
cgggataaactgttataccaatagcccacttacagatacatggttgaagcacagaaaagttacaggcctgagcg  
cacacacagcaaatgggaactctggcactggtctgcatccataactgctgccttacacaatagggtgtgtctggtgac  
atgccagctcctaagaagcactgtctccaatctgggggaaactgggaccagtgagatggcagacacctggctaca  
gcgtcagggtaatgacacccccctcaaatgaggctctgcaaggagatagaataacctaaaagactgtctggcagct  
atgcagggccacctgcccagcttgcgggaaagcagctgaccttactgtagaagcctcttctcctcctcctcctc  
acgcccttctcctcctgaATCACAGCGCTACCCTAGTCTGACTGTTGCTCAATCCAGGAGCACAGTTCCTGTGGGC

TGAGCCTGACTGGCTTGGTCATCTCTTTTCTGCACTTCAAGGGAAAAGCAAGATCTTGCACAAGGTCCCCTCC  
GGCTGGC  
TGCTGGCAAAGGAAAGGTGCCATGGGACCTCTCCACCAGTTTCTCCTGCTGCTGATCACA

>NM\_018865-Mouse-274DBTSS:NM\_018865chr15+6716063667161336mchr15\_00061  
aattctgtcatttctggctggaataagaaccttttctgctgctctgactcagaggtggggagacagtgaagaaaggc  
tagcacaggggaagagctaagttagatgcaagtcctccaccaccatcccagagccctctcaaagtcctcacaat  
gcctctaccttccctacctccagcccacccttctgttctccctctgtccggagagcctgagccctctagagcgt  
ggaggtgctgggtgagaattcattcaccttaccctgtggagtctgggacttcccttaagagctgcagagcggggag  
gtggccaagctgggctggaggtggggacagaggaaagaaaaagagagagggggagagtagcagaaaaagtttttaga  
ggaaaatgcagggtagctgttggcctgacgtcagatgtcgtttgacaaacccccggggctgaggaaggctctcc  
gctgctctgatggccagccCAGTCTGGCCCAGTCCCTGGAGAGGCATCCGCATCCTCTGGGCTGAGCCGTAGCTCC  
T  
GTGACGCTGACTTCCAGGCATGAGGTGGCTCCTGCCCTGGACGCTGGCAGCCGTGGCAGTCCTGAGGGTGGGC  
AACATCC  
TGGCCACGGTGAGTCCTGCTTAGAAGGGATCAGTGAGGGGACCTGATCCCTTCCTGCCTG

>NM\_018865-Mouse-275mchr15\_P002964chr15+6716001067160710mchr15\_00061  
aacagacagcatccccaaacaagcagcaactgagctaccaggaaacacgagaggggagtggtttgtgcacagaagga  
aaactcacttggtaggggacaggcagcagtgagcaggtgcatggagtctggacgaagagaagaacataggacagc  
actggctggcagtagcctagagatgaccttattgtccataatgccaggctgagaacctctggttttctgagatgca  
ggaacaggagagcaagggaacaggggaatctgagacaggagactgaacagcacccttgagaagatgcagaggctatagat  
ctgggtcctcaaaagattcctccccatccccaaaccccccaactccccccccacacccccacctgccatctctt  
gttatgcaaaactgagatttctttagctagggctggaagaaccaaggccaggagtctgtccttcaagaataaaaaa  
tattcaaagacactgaagacAGGCTAATGACTGAGGATCCCTGGCAGAGCAGCCTGGCTGGGAGAGGAACTGAACCA  
GT  
GGGTATGGCCTTGAGGAGCAGGGCAGACCCTGCTGACAGATCGCACCTCCAGGCGTGTGAGTGATAAATTCTT  
GTCATTT  
CTGGCTGGAATAAGAACCTTTTTTGTCTGCCTCTGACTCAGAGGTGGGGAGACAGTGAAG

>NM\_175442-Mouse-276mchrX\_P90065chrX+9855347298554172mchrX\_00458  
tgccggaagattgcagcagaagaagccatgtaaggaattaaatgatgggaaaaatggggaatcaataaaattg  
atacttactgcttctgtaaaaacgcaattaggatttataaataagaattgattttcaatgtaataaaattcta  
acagttaaactggcttttgcatagccacaatttaattgtcagaatagactgagacaacgactgtaatacgtggcaaa  
ttaaagtcagatactctgttctgattgaagaagtgtaaaatcatgaaactctgaattatcaaagccaaaattgaa  
ttactttgccacaataatcctctgaggcaaaaggcttcccaacaactgagtgatgctgacagacagttctacctcca  
ttagaggtaaacgattttgttttttctgcttctgtaataaactacgttacttctcttagctgtaaaagcctg  
cagttcactacaggatctGGGTAGAAAGGTAAGGTTCTTGGCTTTCTTTCATACATTCAAAAATAGAACTAAAA  
AG  
CCTCTGTGAATTGAAAACGACAGTGTGATTTTCTGCTGCTTCCACTGAAACTTAATTCTGAGTCTGCTAATA  
TCTTACC  
TTTGGGGGGATATATTGTTATGAAGAATGGAGACTTCAGTGAGGTAATATCTATTTATAA

>NM\_008080-Mouse-277DBTSS:NM\_008080chr10+127285946127286646mchr10\_00016  
gggaggagtcggatccccgacactgtcgggtcctcccgcccagctcccgcacagccctgcccggcctcatgaggac  
ccccggccggggcggagaaccgggactgccggaccgcatcctgccggccttagaacgttagacaggtcagtgccg  
ctggcacgccggcggcggaggtgtgggacggagcggcgtcctcctggcctcgcgcatcgtgccctggctcaacgagc  
caccgaggggtcaccgagggcgggaccccgagcggcggcgacaccgtgccttccctgacccgaggtgagtagaca  
gccgcccctccgagcaccctggcccggctgctgccgtgggggtgggggtgggggtcccggggctgcccaccaagata  
ctgcatgtcaccagcgaagccttgggtgtatgaggagccagagggcagagagagggcggaaagaggaggccgggaga  
cctttggcgtgagcatgaggGAAGGGGTGCGCGCGTGGGAGCGGAGATGGCTGGCCTTGGGTACCTGCGGAGCCT  
CG

GAGGCGGCGGGTCCAGAGTCCCGGCCCTCACGTTCTCTGAGAGCCTGGTCACCTCTCACCCCTCCCCATATCA  
GGATGC  
GGCTAGACCGCGGGCCCTCTATGCGCTAGTCTTGCTGCTCGCCTGCGCCTCGCTGGGTC

>NM\_008080-Mouse-278mchr10\_P009466chr10+127285302127286002mchr10\_00016  
gttctcttaagtctgtaccaagaagcagtttaggggaagtaggcccgcattgagtaacggcttcctcggtgatggc  
tgaattcggagccaagaggtcagagagaggcgtgctttgtgctgtaggagcgtttcacctccagggtggctg  
gtttatatttcatctccccatccaagtgtccttgaatgaggttagaccgataactgaaccaatcgcccttct  
ggggctacactgtgaacagtggggaaatggcggggaccgggaactggcatcttagacaccggtttggggacgaagg  
atgtgaaaaggggggacctcccggggagggctcatgcctaagcaatcttcccgctccgagacggcggcgaggc  
tcgcatccccgctcagagcccagcctgtgcccagccagcccgggagcggcgctgctgctgagagccgggagc  
gaggcctgagccctcggtgCCTGGGAGCGGACGCGGTGCCAGGGCTTCCCCGCTTTGTCGCTGGGGCTGGGGCGG  
GC  
GGATTTACGATCCAGTTCACCCCGGCAGGAAACGTTTACAACCACCCCGCGCTGCGGTCTACAAAGCCCCGGA  
GTCCGC  
AGCGGGAGGAGTCGGATCCCCGACACTGTCGGGCTCCCTCCCGCCAGCTCCCGCATCA

>NM\_008080-Mouse-279mchr10\_P009484chr10+127291049127291749mchr10\_00016  
gctcaaatgtctaggaaaaggggtgggacctctgggaagtttaaacctagttccggtcatcgaaagcttaagaa  
gtctagagcaggacacaggctgtttgagtgccgggagagggaaaaagatgtcaggcttttctgttccaaccatac  
aactcttagggttggttcgaggtcggaaactggcggtgtccaagtaaccaccaatacgtgctggtgggagac  
gactttgtctcacggcgcacgcggtggagaagcttggagctgctcagaagacgcccctggacctgtagggga  
ggagagccggatgtggggtgggagacgggagagcgggagctccaaagtgagcagctctgggggtagtggggacctg  
tgttttcgatagggcgagggtggggcaggggagcggggaggaagcgttactctcgggacctgcttagctggagc  
atcctctgcctcctgagcTAGGGGGCGCGGTGCGGGAGATCTCGGGCTACGCTACCACCTACCGGCAGCTGCTGAGT  
G  
TGGAGCCGGGCGCCCCAGGCCTTGGGAACTGCTTCCGGCAAAAAGCAGGGCTTCCACCACGAGCTCGTTGGCTTC  
CCAAGT  
TGTGTGGTCACAGACGGCGTGGTCAACTTCTTCTGGCGCGCACAGACAAAGTGGCCAA

>NM\_172870-Mouse-280mchr4\_P029195chr4-8282074182821441mchr4\_00558  
agtatgttagaaatatttaagtgtcatattttgcaagtgttaaagaaaagactggtgttgatataacatgttacagc  
agacagcattgtgggaaaattcccaggaagggccctggcttcccctggcctgtgggcagtgatcgtggcgttctg  
ggagtacgcagagtgatctatctgtgtctggagaggggttagtgagggtgctattggtgctgacagtgga  
cagtgagtgactctgctctgataccaatgacatgagtgaggggttgaagctgatggtgggtctccagtc  
agcctgcacacctgacagcagctgttaaaccagcaaggaagctaggggagtcacaatctatgataaatgatagg  
atatctgtcagaaggtgcaaggaagctgacccccctccccagatctccccctcccaatgaaacgcacagttca  
gccagcttctaactacagtATACTCCTGCTACTGGCTGCCAAGAAGCTCAAAAAATCCACCTTCACTTTTCAGTCAGA  
A  
GAGGCAGAAGTGGATGTGAGAGAAAGAGACACACAGAGAGACAGAGAGCCAAAGAGGGCAAGAGACTTGACT  
TTAAGAGA  
CTCCTGTA CTGACA ACTCCATGCAGTTCGGA ACCAGA ACAA CTGCGGCTGA ACCAGGGTT

>NM\_030888-Mouse-281DBTSS:NM\_030888chr15+1085587110856571mchr15\_00526  
ggctgctgctggtatctggaaggagaatgagttgcttgagcagccaaagtgcaaaattgtgatctgaccgtgcaaa  
agcaagacctccctccatggccttgaatgggatcctgctgtgattgcaggaactgatacagctgagccgattccctgg  
caagctcaatggtaggttttccaagagtcgttttagaccacaaaggcacagccttccacgtctaatacgaaggcaag  
ccactggacacacactctgtttccagccggctgtgtacatcttccactctacacaaaataacatgccaaggtgag  
acattatgaaccccaactggagccgctgcacacagactgcttgctgctgaggaatgtgatgaatgagagct  
gctctgtgaggagagcggctgctactctggcatgactgagcctattattacacacaaagagtataaaccac  
acagccggctgagctctcaTCTCAAACCTGGCATTTCCTGAGGCGACCACGGTACCTCCAGCCCCTGTCAAGCTTC  
C

CTGCGAGACTCTTGTGCGATTTGCCGATTTGCCGAGCCATGCTCGGGAGGCAGCGCATCTGGTGGCACCTGCTGC  
CTTTGC  
TTTTCTCCCATTTTTGCCTGTGTCAAGATGAATACATGGAGGTGAGCAGAAGAGCTAATA

>NM\_009866-Mouse-282DBTSS:NM\_009866chr8-102135321102136021mchr8\_00019  
cctcccacttgggcaatgccttccatccaatccatcctccggcgggcccgggtgaggccctagcttccagctggagc  
ggatttcaggaaaagaggaaaatgggggctctcaagccctcctcagctccctccgtcgtccttctgattggctgtga  
tccccggagcccaacttcagtcgctccagactgtgtctgagcccccacaggagacggagcgtcgcgaccagggcaggag  
gggaggccaggccactatcctgggttggcatctctcggggcccagggggggaggagcgcgacagggtaggcatcc  
atcgctcctcaggccaatctcggcgtctagcagcctcgggtcctcctcggcccccttccctccagcgtcggcct  
ccctcctccccctcaccgcccgcctgcccgcacctccccgggttctcattcctgccaactagcgcgctccgagc  
gctcattccgaggccgcccgcCAGCTGAGGGGAGCGTCGCGGGCCGAGGAGCAGATGCCGCGGGGGCCGCTCGCAGCCG  
CC  
GCCGACTTGTGAATGGGACTCGGACCGGGGCCGGGCTGACACCGCTGCGCTCGCCCCGTGCCAGGGACAGCCG  
GCCAGG  
AGGTCGTGTCCACCCGCAACGGCCCCAGGTGAGGCGCTCTGCTCGGCTCTAGACCCTATC

>NM\_009866-Mouse-283mchr8\_P016055chr8-102137138102137838mchr8\_00019  
gctccagcaagaggttacatggatgttagctgtaggtttgtcgttccctcatgcagcgcggtaaagattggaaaatc  
caggagctgtcataatgccagggttagtgggacattccggtcgttccctccctgtaactcacttgttatgtgg  
gaatgattaggtagcagcccctgttctttacagtggggacttccgggtggtggttggaaactgcccgaagtttagg  
gcttagatccgacttcagatgaaaggacagagccaaagaatcaagaagaaagagaaaacctaaccatggtgtagaa  
ggggcttaggtccctgcaccaagatgagcaggtagaaagctcagctagcagctccagacaagtaccggattcccccc  
caccactccccccccctgcttctgtagtcttccccacaccctccggcggccagcagctgctaccagcggcggcg  
tgtgttggcgggtggcgggtGGGAGGCCTGGAACTTTGGGCACGATCCGGAATGAGGGAAGAGGGAAGCTGGGAGATG  
AG  
TGAAGTGGGTAGCTGAAAGCTTAGCGCCCCCTTTCCCAAAAAGAGTGGGCAGTTTAAAGGCCACGTCCACAGC  
GAGTGAC  
AGGCGCTTCCTTTCCAACAGTATGGTTACTGTGGGTGGGGGTAGGGGCGGCACCCAGTG

>NM\_009866-Mouse-284mchr8\_P016064chr8-102134303102135003mchr8\_00019  
agctctggacacgcagactgctcccgtgatgtctctagggaaagtcgaccctgtgcggtgcccggcggctgcgctg  
tccccagacaagatcgctctctcgggggtcctagaggggatcctcccgccttctaaagagctcccctagaccgg  
tgctgtgtagagagtgcggtggaagccagaagatagccggcggcgggaggagcggcgattggattggcgcacttt  
gatagtgtgggtcgggggctgtgactcggctcagagctgggggtgcggtgtgagctagcccctccagccccgcct  
ttcggggactcagtcacctatcctaactcccagtgatgcaggaatgctctgtgagcggctcagactcagactagac  
tcgggcttgactggaggaagcttctagggtaatgtaactttgagaatcaaacttcccgaagcctgcgctcct  
ctcggagcgtccaagcctcCACTGTTTCTCACAATCGGCCTCCCTCCCTGTGCTTGGCCTCCAGCCGGGATGTGCT  
G  
AGAGCAAGGAGCAGCGGGAAGCTGGAGGCTGCGGGAGCATCCAATTCCTCGCAACCCAGCCTAGCCTTGGC  
AGGGTCT  
TTTCGCTCCTGGTCCCCGAGAAAGTGGGACCCAGGAGGCTTCTATTCTCTCTTGGC

>NM\_007389-Mouse-285DBTSS:NM\_007389chr2-7347427673474976mchr2\_00092  
cctgagttgatccccagggcacacacagtaggagaaccaacttgaagactctctattctacataggcaccatggc  
ataccaccaccacctcacataagcaaattaattaataaaaaccctatatacaagactaggggtcagtacact  
ggtagagttgatagaccatttctatthaaccatttatatttagctagcagctgtgaagttaggggttgcattcaaca  
ccaaacacaatgacaagcctctgactcatgatctatgtagactctcagacactttacatctagtaagagatagcgatca  
tgttaagcaaggcagctgtgtggccacagaaggcccaagctttgaggctgtgggcagctcagctgtcatgaggcagc  
aggtgatgtaagacaatagctgtggagtcagctggcttccaaggccagcagcaagctcccctaagcagggtggagtagg  
accggcagcaagcggcgtggcGCCACAGCGGCACCCACAGCCCATGGAGCTCTCGACTGTTCTCTCTGCTGCTAGGCCT  
CT

GCTCCGGTAAGTCCCAGGGCTGGGGCAAGCTTTTGGGGTAAACACTACATTGCCATACCACTGTTCCAT  
ACTCCAG  
TCTTGTTCCTTGGATGGGAACACAGGACACAGCCACACCAGCCAAAGGCTTCTCTATCAG

>NM\_007389-Mouse-286mchr2\_P030255chr2-7347946273480162mchr2\_00092  
aacatcaaattctggctgtctgcaactgtagtctaagtgaactcggacacatcacaggttaactgataaattattctc  
tggcggagaaatgagccaattcaagccagatttagcgaattttataaaggcaggttattgggaactgcacacaggagag  
atcactggttccaagaaatgaggccaagtcgcatggagagggagacagaggggtggggggagtgaggaggaggagag  
agaaagagagaaagctcgacagagaaaaggagaaaagagagaaggcgagagcggaatgtctgattcataaagggaag  
agcctctgggggagggggaagccaacctctgggctgggaagttagagtagaggcatgcttggcaggtaggtactga  
gggatgctgggagaacccggaagccaggtccacttggtatgttaaattcagcccagtttctgtctgggctggaat  
cccaacagtaacaccactccGCTGAGGAGAGCGAAAAGGGAGACGTCTCAGGACTCTCTCCCTGACTCAGGGATGATGTC  
CT  
CTTCCGCTCTCAGAAAGGGAGAGCTTGTAACTAGATAGGACCGCCATGCCTACTGCTGTGAACCACAGCTCCA  
AGACTCA  
GAGGCCGCGAAAGAATCGAAGAATCTGGCTTGTGTCTCATAGGAAGCACTGTGTGATCCA

>NM\_007389-Mouse-287mchr2\_P030260chr2-7346251373463213mchr2\_00092  
tgtgtgtgtgtgtgtgtgtgtgtgtgtgtgtgtgtgtgtgtgtgtgtgtgtgtgtgtgtgtgtgtgtgtgtgtgtgt  
agtgttggtctagcagcttcatattgagagaaaggtattccgggctgctggccgcctctgggtaacagaaagaccag  
gggcaagggttattcaaaccttctaccttcttagcttccaaccagaatccctctgttttctgaataccaacaacia  
taaaaagagtaggacatgaaacaaagtcgcaatttgctgcttggcagctggaatggaaacctggccacaaaatgctg  
tcagggcccaggctctcgagaaaggatcaccagaattaccttggagaacaagctggctacgttcttcaaccttggtt  
ttggggctgatgagcgcagggactgctgatggaatgtacaggtggatgctctgagcagcagcagctgtttctct  
atagctctgaaagcaaggagCCAACACGGTCAGTCTATTCTGAGGCCACTCTCTGGGCTTGACGAAGACTTCTCC  
GT  
GTCCTCCACAGTCTTCCCTGTGCATGTCTGCGTCCAATCCCCCACCCCCCTTACTGTGACACCAGTATACCA  
TACTCT  
TGTTCCTGCCTTAATGGCCATGTATCCAAATTCTGACCTCTGAGATTCCAGGAGCAGGCG

>NM\_019952-Mouse-288DBTSS:NM\_019952chr19+40022714002971mchr19\_00604  
cttttggaagtgggacaagtggcgggacaataggcaagggggcggtcagcccagacaaagggcagcaggaaaaacacca  
tcacttgctggaggccagcttctggcatttgagagaaatgtgtcattgactcaagtgggaggggagggaaggt  
tagaatgaagaggcagagtagagtggttacaggaccctcaaccggcaatgagcagagggggaagaaggccagcatgct  
tggccgacaccaaggaagaagcccacaccaaggcagctcccttccaagctctcaggagtttggcagggacgatgcc  
tccttccccctccccaggaggctagggtgtacgctcgcagccttgcctcctcaccacccccctcagtgtg  
tgggaggagaggagccccagaagccctccctctccccctctccccccacccggggagggtgctacaatt  
gtggttacagcttacacgtCAGAAAAAAAAAAAGTTTGCAGAATGTCCCACACCGAAAAAAAAAATGCGAAACCGAGAG  
AA  
AAAAACCTGCGAGTGGGCTGGCGGATGGGATTATTAAAGCTTCGCCGAGCCGCGGCTCGCCCTCCACTCCG  
CCAGCC  
TCTGGGAGAGGAGCCGCGCCC GGCCGCCCCAGCCCCATGGACCTCCGAGCAGG

>NM\_019952-Mouse-289mchr19\_P000277chr19+40004334001133mchr19\_00604  
taagaatcagaaggaagagggtgcccaggagccatgtgtaaagctgttctgctcgaacctgggctgaatctac  
tgggaacagctgcccagttctgaggccaatgcctctgagacacagctgggtggagcaggtcagactccctctccag  
cctcattgagaggcattcctcctcattgctgtctttccctctggtgctacctctctcattctattgtctcctgt  
gtctcctctctcttccaggtcctctctctctttcttccccctcagccctcttactctctctttcctcagg  
cggttccccctgactcagaaggtgcttataaggtgctgagggtcagccaatcaaaccacattgtctgcaagcc  
ttcttccaccaggggtgagctgtggagctgacagcccaagccgggtccaagctgctccccctcctctgtctc  
ccttcagaaggggtgtagaTGCTAGGGGACCTCTGTTCACCTCTGGGTCACTTACTTGTGGGCATCTGCCTTCTT  
GA



CCTTGGCAAGCGCACCAAGAGATGGTTAGGCTCACTGGCCAAGAATGCCATTGAAACTCCAGAGCCCTGGCTG  
GTGGGGG  
GTGGGGAGGTGGGGGAGGGAGGTCTAAGCACTTTTCACAGGGCCCCTCCAAGGCACTTTT

>NM\_019952-Mouse-290mchr19\_P000293chr19+40091634009863mchr19\_00604  
tgtgtccagctcgcctacccccagacctggggccctgtgttctggaccatgggcctccctctgtctgcctctccat  
cctcacagacctcttagggggttgaggaggatctacaagaatctaggcagtcagtgcaaggggttcagggtatgg  
agggtggtgtgcataagaattgagggtagttagagatgttcacagagcccaggagagacggagagaggatcggagg  
cactgaggaccatggggaacagggcccctctcccggttctcttccacatccagaccctactctgagccaggaaga  
aaaaggaggagggtggcgggggagctggctccagccccagatacaccaggaaattagttgtctctgtgtgtcagc  
gtgtgaacctccccctgggcccagtgccatcccaggctcgccctcttcttccctccagttgcacatctccaca  
tcccctccctgggctcagGCCGTTCCCTGAGACATTGGCAAGGACTTTGCCCTTTCCGATGCTCCTCTGCCTCCCA  
TGCCCTCCCTCCTGTCTCTCTTTAGATTTCTCAGTTTCTTCTTTACAGCTCTGCTTCTAGGAACTGAGTTC  
TCTTCT  
TTGGGGTAAGTACATTGCTATCTCTTGTCCCTTTGGCCTGTTGAGGAGGAGTTTTGGTGT

>NM\_013519-Mouse-291mchr8\_P010544chr8+120562099120562799mchr8\_00091  
gagctgtatgttttgagtggtcattagttgattaggtgaagcaaccagggtccgattgcaagactcaaaacttt  
gatatctggaccttggtatttagcctcaggaggaggaagtgccaaataagggaaatagacctcagggtcaacttagga  
atgtaatcaagattttagccaggcagagggaatgagagaaaagggttaaggcttccagagccatgtttgccacgctc  
gagctcagagtccttaccgaaaatggctttcataagccaagcggccaggtggcttcttatgggtttat  
tcttcagtgcaagcgtcgtggtgtccacaaggtgtcagaccgtcattagaaccaaactgactggcttctctcgtg  
ctccccgcccttttccgtagtagttccacaaccggcctcaagatggcaccaccaccacggagattccgagggcgc  
tccaggtgatgaagccaggCGCCTGCCGAGGAAGAAGGGCCGGGGCGGAAGCCGGGGAGGCACCTCCCTGCCCTTTT  
CA  
TCGCTTATTATTTGACAAACACACAGGGCCCTCTGGGGTCTGATTTGCCTTCGACTCGTTGACAACAAGACAA  
GGAAGAG  
AAGGAACAGGCAATAAGCAAGAATGTAGCAAGTCTCAGAGAGCTGAGGCCTCTGCTGGCT

>NM\_013519-Mouse-292mchr8\_P010546chr8+120564718120565418mchr8\_00091  
ctctgaaccattacaactagggccgataattaagaaatcaattattcgcctctcatcattaataataaaaaa  
aaaatctccaggctcttctactacaaggtctgggggcaaatctctgcccaactcatcaattcgatgtatatttc  
aaactaaactcttttttccaaaggaacagggttttaattttgctctggacacgtggtctcgttaacaaaatg  
tgataataaaataaaatttataagatgtaactcattttaaaagctcctcaagtttaactgagctggggggggggagat  
ctggctaagagcatctgggtcttagaccgacggattcaggcgtcctcgttttgattggtgccatctctcgcagctg  
ccagatgattggtgcaaaactctggagggggcgccgctgaagaaagtaaaactcgtttgagccagaagactttga  
aactttcccaatccctaaaAGGGACTTTGCTTCTTTTTCCGGGCTCGGCCGCGCAGCCTCTCCGACCCTAGCTCGCTG  
ACGCTGCGGGCTGCAGTTCTCCTGCGGGGCCCGAGAGCCGCTGTCTCCTTTTCTAGCACTCGGAAGGGCTGG  
TGTCGC  
TCCACGGTCGCGCGTGGCGTCTGTGCCGCCAGTCTCAGGGCTGCCACCCGCCAAGCCGAGA

>NM\_008225-Mouse-293DBTSS:NM\_008225chr16+3678622436786924mchr16\_00034  
gcagaaagcaaggaggagaaattgttttaagacttccctcaaaattaacatacagatcattttccactaagcctttt  
tttttttttattgattgctgcagactacacacacacatttttcttctcagaccaggcttctacaacaatgtttag  
cccagggtaccctaaagtgtgggatcacagaagtactaccacacctgcctgttctgaattcttttacttagatga  
actgtcctctgtaggacacagagcagtcctgcagcattctattgtgtcttaactgataaggatgtgtctccacggtca  
ttttataacttcccgtactgaaaaacttgcataaactagacacagaaacttaaccttctaagtactcaaag  
tataaggaactgactcaaaactcaggaagtagctgtgaggacagtgaggcaggaaatgacagaaacctgaaaacggaac  
tggagcagctgctctgttacTTACCCTGAAGTGGCAGCCGCTGGAGGGGGCGCCTGGTGTAGATGTGAAAAGCCGTAA  
CC  
AGGAACCAGTAAAGGTGGGTGCTCTGAGCTGGGGTTTTGTGAGGGGTGGGAGCACAGGGAAGTATGAAA  
AGAAGTCT

ACATAGCACTTAGTCCTTGTTAAGGGAGGTCTTTACTAATAGATGCTGAACTCTTGATGG

>NM\_008225-Mouse-294mchr16\_P003718chr16+3680674136807441mchr16\_00034  
gaaacagcacacacctcatatgcctgcctttgtcccagagatgatctctcacgggctctatacatagccatgccttgaa  
ggagggaaaatattgcgatgctcatttgggatggaaatgaggggtgtgtatgtttaagtagctcacctctacccgagc  
ccagagcccttcctggcctatcactctgcactccttccttcagacctctctctctctctctctctctctctctag  
cattccagggggccaaggctggcctctcaggccttcctgtctattgcagattactctcatggcttgggtggccgcta  
cggggtagagaaggataaacgggacaaagcagccctgggatacactacaaaggagagacggagaagcacgagtctcaga  
gaggtaaatcggattggaaggaggaggtcactaggtcgcacagggcccgcattccttctgttttggaaagccgaccagg  
gtcctagaatagaggcagatGAATAGAAGAGGGGCATGAGGGGGCTCAACTGATGGAATGGACAGTGGGATTGGA  
AGT  
GAAGCAGAAAAGGAACAAGAAGGAAGGGTACTGGGGAAGGAATAACTAGGCCAGGTGATGGGCCGAGATGGC  
TTGGTGTA  
AGTCTCATGGGCCAGTCAGCCTCAGGGAGGACTGAGAACTTTCTCCTGGGACACAGCAGG

>NM\_008318-Mouse-295DBTSS:NM\_008318chr5+101662440101663140mchr5\_00064  
taggtaatctgactggttaataatcagtttgacttacaagcctctgaaatagtttcaggagaaatataaaggaa  
tcaatattaaactatctctggcatcaactcattcctaattcagtaacttttagaccatgcagtgtgtgtgaaagcca  
gcttctcttttcaacacagtgaaaacctgatcattgtgaaagcttaaagcttaagtcttttgctatttattat  
ttgaaatgcagatattattatataattcagaactctaactaccatcttctcctcaccttcaattaaatcccacaatg  
caagcctcttggcagaaggcccactttcatgtttattcaactgaggctgaatctgaaaatgttgaagttgggatt  
ctctggtgagaaccacagcctgacgtgtgctggccacagctgtgattggctgttgagaggcggagaagggttatagt  
cagcaagagcaagtgaatgaGTGAGTGACAGCCGGGAGAACAATCCGTGCCACTCACTCGAGCCAGGACTGCCGAAA  
GGA  
AGGTAAAGGTAATGGGCAAGGACCTCACAGCCAGGCACCTCAGTCTTCCTGTGTGGCTTTGGCTTGGAGTTTG  
TAGCTGC  
AGCATGGATCTTACTGCACAGTGCACAGTGGCTCTAGTTGAACTTTTGCTTGCTATGAAA

>NM\_008607-Mouse-296DBTSS:NM\_008607chr9+72475387248238mchr9\_00065  
ggtcttatacatttctgaggcctcaaggaaatacagcaaggattctcactgttgctgctcaagacagaatagagttga  
gaactcatcaacctataaccatttgggacagaacttgtcttcttacaggaacaacatttactttgctattatt  
attacctgaaaaactcagagtagctgtttccctacaaaaggaagacaacatttctccagtgaagtgaaaaataact  
agctgctgtctccccactataatcctgaaaatgctgaggctgtttatttggcagatgagtttgatattccccact  
gaaagtagagatgccttcatttccattccctcagattctgccacaaaccacacttaggaagaaaaaaaaataccatgt  
aagcatgtttacctcgcctcactaggaagtaacacacaccccaagtggtgactcatcactatcatgctataaaatag  
aagatgcttgcctgggaagGAGAGACTCCAGGCACTGCTGGGCACCATGCATTCAGCTATCCTGGCCACCTTCTTCTT  
G  
TTGAGCTGGACTCCCTGTTGGTCCCTGCCCTTCCCTATGGTGATGATGATGATGATGACCTGTCTGAGGAAG  
ACCTTGT  
GTTTGCAGAGGTAAGTATCTGCCAAGGATGGCACTGTAGTGCATTTCTCAAATCCCTA

>NM\_008607-Mouse-297MMCOLLI\_1chr9+72474227248122mchr9\_00065  
cactgaatccttaccacctgcctcaaggacctcattccaggacccccatacccagctgcgggtgtgtggcagga  
ctcaatcatctacagtgtcttaaagacctcaagcttgggtcttatacatttctgaggcctcaaggaaatacagcaagga  
ttctcactgttctgctcaagacagaatagagttgagaactcatcaacctataaccatttgggacagaactttgtctt  
tccttacaggaacaacatttactttgctattattattacctgaaaaactcagagtagctgtttccctacaaaaggaa  
gacaacatttctccagtgaagtgaaaaataactagctgctgtctccccactataatcctgaaaatgctgaggctg  
ttatttggcagatgagtttgatattccccactgaaagtagagatgccttcatttccattccctcagattctgcc  
acaaccacacttaggaagaAAAAAATACCATGTAAGCATGTTTACCTTCGCCTCACTAGGAAGTTAACACACAC  
CCC  
AAAGTGGTGACTCATCACTATCATGCTATAAAATAGAAGATGCTTGCCTGGGAAGGAGAGACTCCAGGCACT  
GCTGGGC

ACCATGCATTACAGCTATCCTGGCCACCTTCTTCTTGTGAGCTGGACTCCCTGTTGGTCC

>NM\_008607-Mouse-298MMCOLLI\_2chr9+72474697248169mchr9\_00065

ccccatacccgactgcggtggtctgtggcaggactcaatcatctacagtgtcttaaacctcaagcttggttcttatac  
atttctgaggccttcaaggaaatacagcaaggattctactgttctgctcaagacagaatagagttgagaactcatcaa  
cctataaccattttgtggacagaactttgtcttcttacaggaacaaacattttactttgctattattattacctgaaa  
aactcagagtagctgtttccctacaaaaggagaacacattttgtccagtgagtgaaaaatatactagctgctgctt  
ctccccactatatccatgaaaatgctgaggctgtttatgtccagatgagtttgatattccccactgaaagtagaga  
tgccttcttttccatttccctcagattctgccacaaccacacttaggaagaaaaaaaataccatgtaagcatgttta  
ccttcgctcactaggaagtTAACACACACCCCAAAGTGGTGACTCATCACTATCATGCTATAAAATAGAAGATGCTT  
GC  
CCTGGGAAGGAGAGACTCCAGGCACTGCTGGGCACCATGCATTACAGCTATCCTGGCCACCTTCTTCTTGTGAG  
CTGGAC  
TCCCTGTTGGTCCCTGCCCTTCCCTATGGTGATGATGATGATGATGACCTGTCTGAGGA

>NM\_008607-Mouse-299MMCOLLI\_3chr9+72474967248196mchr9\_00065

gcaggactcaatcatctacagtgtcttaaacctcaagcttggttcttatacatttctgaggccttcaaggaaatacag  
caaggattctactgttctgctcaagacagaatagagttgagaactcatcaacctataaccattttgtggacagaact  
tgtcttcttacaggaacaaacattttactttgctattattattacctgaaaaactcagagtagctgtttccctacaa  
aaggaagacaacattttgtccagtgagtgaaaaatatactagctgcttctccccactatatccatgaaaatgctg  
aggctgtttatgtccagatgagtttgatattccccactgaaagtagagatgccttctttccatttccctcagat  
tctgccacaaccacacttaggaagaaaaaaaataccatgtaagcatgtttaccttcgctcactaggaagttaacaca  
caccccaaagtgtgactcaTCACTATCATGCTATAAAATAGAAGATGCTTGGCCTGGGAAGGAGAGACTCCAGGCAC  
TG  
CTGGGCACCATGCATTACAGCTATCCTGGCCACCTTCTTCTTGTGAGCTGGACTCCCTGTTGGTCCCTGCCCT  
TCCCTA  
TGGTGATGATGATGATGATGACCTGTCTGAGGAAGACCTTGTGTTTGCAGAGGTAAGTACTGTA

>NM\_021509-Mouse-300DBTSS:NM\_021509chr10+2398287323983573mchr10\_00653

tggatgagcaggcatcactacgagctccagtgaggaaagtcaaaagtcaaaagttgcccaggatgcaaacctgcagtt  
tccatctggggggtgggggtgcttcccttctctcctccgacccccagatttcccagctgtcttccctccatggt  
cccagagggatgctttctatccatcactttccaattccttcttaggtccctcccagctgcacatcgattcctttt  
ttccctcttcttctaccggctgggtccccttctccgctcttccaggaagctccttgccttcttgcctcttaa  
cccagactcagggacaaaataggatacacgggtggcagcaggtggatgctggggagaggctggggagtctcctgtagg  
accgagaaccagcggggcggggacagcggggcgggcgccgccccggggcggtccaagtgggctccctggtcttc  
gccccagtggtgcagccCAGGTGCGGCGCGGGACAGGAGGATGTGCGGCTGGCCACTGCTTGTGCTGTGGGCGCT  
GC  
TCCCCGCGACGGCTGCGGGAAGCCCGGCGCGCTCGTACCCGCACCGCTGGTCTCGATCCCGAAGGCAAGTAC  
TGGCTG  
CACTGGGGCCGGCAGGGCGAGAGGCTGGCCTTCCGTCTGGAGGTACGCACGAACGGCTAC

>NM\_021509-Mouse-301mchr10\_P001281chr10+2398161423982314mchr10\_00653

atacacaacatacacacacatacaaacctacatacacaaacatacacacaccacacacacatgcacagatacatacaa  
catacacatataccccacacacacaagcacacatactacacacacacacacacacacacacacacactgtgtttggaagc  
tttgtgcaacttgacacaagctaaagtcatctgagaggaggaacttacttcagttaagaaaatgctccatcagatgg  
ggctgtaggcaagcctggaagccattatcttaattagttattaataaggagggcccaaccggttgggtggtgcatc  
cctgggctgggtggtcttgggttctataagaagcaggccaagaggagcaagctagcaagcagcaccctccgtggcctt  
aatatcagctcctgcacccaGGTTTCTTCTGCTTGACTTCTGCCCCTGACTTCTACATGATGAACAGCAATAAGTC  
C  
AATAAACCTTTTATTTTCCAGCTTGCTTTGTCTGGTTTCGATTGAAGCAATAGAAACCTTAAGCAATAGA  
AACATGC

GTGCGTGCCTGTGCACGCACGCACGCACACACATCCTATACTGACATCTACATAACA

>NM\_053136-Mouse-302mchr18\_P90032chr18+3786407437864774mchr18\_00237

atagcagaccaggatctcttggaaacttggcctattttataattatcaaggcacagctaaataacatttaaaattcaatg  
agtgacacaattatcactttttctcttctgaatgtatgaatatttcaaatcaaatattaaaagggtgaaagataatt  
ttctttatatttattatatttaccttcttgaacaaaatcgaattgtagacctaaagaagggtgattcagctcctcgg  
gactcttaccaggtaaaaagaatggcatcttgggtgttttaaatgtattcttccactcaaaacttaattcagtaaaat  
catactagaactttcagttgatgaacatggagcttgaactcaggctgtgtgtgtaaactaaaaggatactgaacacag  
caagtttaaaattggaatgaagcgacaaaatgatgtcaaaaagcaataaggacacttggcggcgtgcaggcttaaga  
gtgtcaagaatgagctctgcAGACACCCAGGAAGCCATCTCATTAAGTCGAGACAGAACGATGGCAGCTGCTTGAAGA  
AG  
AAGGTAATAAGTTAGGGTTTATAGAAGAATCTAAGAAGACGGCGTCTTCCTAGTCGGATTTACTCCAATATCT  
CCGCGGA  
CACTCAGCAGTGGACTGTAATCAACCAGAAGCAGCAGCACCCCTCTGGACTGAATCTGCAC

>NM\_008880-Mouse-303DBTSS:NM\_008880chr9+9210780092108500mchr9\_00091

atgactagctgttgcactctggagagcactctgggtgccgttctggtgccatgaatatcagtgaggcagtttaataaag  
cctcttataaaacttacctgtggtggtggaatctcggagtgacccagaccataacagtcatagggagactccgtc  
tcaaagggtcattcacctgaatgtgaacaactgtcccaagattgtgacaaaatataataaggaaaaataattggt  
ggtctaccggctcctgctggtactcagtagaagaagtaggcatcttgagaactatcgggatgactctgactctcct  
aacacaaaacaaaacaaaacaaaacaaaagaaggaaggaaagcattcctgagctcctttgaatcagtgccagcattga  
agaatcagtgagggtcagagtaaagggaatgccagtaaggttccttggcgtccagaactgtgcacagaccagatat  
tcatttctactgagagcctcTGCCAGGAGCAGCTAACAAATCTCAAAGGACTTAGAACTCAGACAGGGTTTCAATTTGG  
T  
TGCGTATCTTTCCAGTCAGGAAAAGGAAATCTAAAGACTCAGGAAACAAAACCTAAACTGCCTCAAAGTCCAG  
GTGCTTT  
TTCTCCCTGACTTTAGTCTAGTGGAGTAGTGCAGCACCTATGCCTTTCTGAGAGGAGTCT

>NM\_021451-Mouse-304DBTSS:NM\_021451chr18+6698406166984761mchr18\_00329

attaaagacttctgtttttttcacttcttgaacgaaccacattttagaattcgaagtttccccttccctcttcc  
ttctggggtcgtccctaattggcgaagaataataaagtcgaggcgcctggccccaccccccccccaactttct  
tcccagtaagaatttcttagccactcctgacggcgccactgcccagcaatggatacagatctctcaagggtgaagtt  
ccctcccacttcttttttaagaagcaattgggggttgagcaggactcgtcctccttgcgccctccgcttaggtc  
ggcgccgcccgatcagggttccccggcaagtgcgctcggggcgtctcgagactgctccactcgtcgttcc  
cgcgccgcccgttcgaagggcggggacacggcggggatgctcgtcacatgacgtcaccggagaagtcgataaaatg  
cgagagccggtcggggcgcCTGAACAGAGAGGATTCCAGCGCTGGTGCTGCCTACTGAAGCTCGGTGCGTCTGGCTC  
GC  
GGCACTCGCATTCATCTTGGCAGCCCGAGTCTTGGGGGAGCCCCAGAGCCAGATTGGGGACCTTAGTCTCC  
CGTGCC  
CAGCGGAGATCGCCGCGGCTTTCTGAGATGCCCGGAGAAAGGCGCGTCCGAACGCGCC

>NM\_021451-Mouse-305AB041231\_1chr18+6698407266984772mchr18\_00329

cgttttttttcacttcttgaacgaaccacattttagaattcgaagtttccccttccctcttcttctggggtt  
cgtccctaattggcgaagaataataaagtcgaggcgcctggccccaccccccccccaacttcttcccagtaaga  
atttcttagccactcctgacggcgccactgcccagcaatggatacagatctctcaagggtgaagtttcccctccact  
tccttttttaagaagcaattgggggttgagcaggactcgtcctccttgcgccctccgcttaggtcggcgccgccc  
gatcagggcttccccggcaagtgcgctcggggcgtctcgagactgctccactcgtcgttcccgcgccgccc  
cgttcgaagggcggggacacggcggggatgctcgtcacatgacgtcaccggagaagtcgataaaatgcgagagccggt  
ctggggcgcctgaacagagaGGATTCCAGCGCTGGTGCTGCCTACTGAAGCTCGGTGCGTCTGGCTCGCGGCACTCGC  
GA  
TTCATCTTGGCAGCCCGAGTCTTGGGGGAGCCCCAGAGCCAGATTGGGGACCTTAGTCTCCCGTGCGCAGCG  
GAGATC

GCCCGGGCGTTTCTGAGATGCCGGGAGAAAGGCGCGTCCGAACGCGCCAGTGAACCCAA

>NM\_172815-Mouse-306mchr15\_P017468chr15-4318864443189344mchr15\_00340

aatttctgggacgtctgccttcagagcagggttagatttaaatttgggaaaaggcagaggttctctctgtttt  
tttttttttaaggctgaagtgtttttcagaagcagcagctctcatcctggcactcaggaggaaagtagaaggtacc  
ttcagttccccatcaaattctctggagaaaggctaattggtaggtgggaatcgactccattgtcccgagaggaccc  
ttgggtgtgaacagcaagggcaggccatatcgctcacctagggtgctctcagtttagaccatccctctgggaaagccgg  
gtgagcattattttcttacgaagctctctgcatgccgtcagctactcttaggacctcagggaaccgagcgtttct  
ggcttaggaccaggaaactctgagcagcctggcttagatgtcttgaccacagcaccactactatagaagcatcc  
cgagccttagctgtctgcaTCTCCATCGGAAAGTGCCTGGCTACATCCCTTCGGCCTCCGGGCAGTGTCTGTCTCC  
C  
TTAGCTCAGGCAGCGAGAACTTCAGCTGCGAAGTGGTGGTGGAGAGAGCCCTGGGAGCAGCGACTGGACCCG  
GACACCA  
AGAAGAGAGTGGACGCGCCCTCGACTAGGAATCGCTCTCGCAGGCGGAGACCCAGCATC

>NM\_009820-Mouse-307AF134836\_1chr17-4296568142966381mchr17\_00049

agagccgccagtaataaaaaaaaaaactacacagccatgatttaattttaaaggaatccccaggtaaca  
ctttgtgacagccaattacagctgatccgatccggcaaggatttgaagcagagctctggaaggtaaactcttt  
ttacaatgagttacagatccccagcttaggaagacaagcaaaaggcaaacagaaggaagcagccaccctgggaaatccg  
aagcagccttgaagtatacaatccccagatgcgaattactgcaaacagcactgttctcagaacccaacactcag  
ttgagacaattttgtcacttttccatagacataataatgaaggaaggggaggggtagagaagagagatgaaaaagc  
agaggaggaaggggagtagggaggtggcagaaaggaagccttagctacagagttctgctccagaggcttaacct  
tacaggagtggtggctcctCAGCATTTGTGTCTTAGCCAAATCCTCATGAGTCACAAAAATTA AAAAGCTATAACCT  
TC  
TGAATGCCAGGAAGGCCTTACCACAAGCCTTTTGTGAGAGGGAGAAAGGGAGAGAGAGAGAGAGAGAG  
GGAGAGAG  
AGAGGGAGAGAGGAAGGGAAGGAGAGACAGAGGAACACCCATAAGTAAAGAGACAGAAGG

>NM\_009820-Mouse-308AF155360S2\_1chr17-4288727942887979mchr17\_00049

aacaaaaacataataataaataactgaacttttttaactttttatttttaacccccaaagtggggagtggttaga  
aagacagttagactagacttagctgagacgaagactacacttaataaaagattgggaaatgaatggataaccgctg  
gtattcccccttccagcaagcattttatcaactacaactattttaattaccaagctgtcatttttagttctttt  
attaaaaagcaaccatccttatttccaataatgacaagaaggaatataaagaaaagtgtccagacatccgtagag  
tttctaaaactattttgacaaactcctgtcaccattttgggtgcacctaagggggggcactcccgaagctgtaaaa  
acctccccccgcccccaaccaatgtggggtggggtgggggcagggtgaagagtctcagaagtcaactgtggagactga  
gaatttccctctctctcCTGAAGTTAACAACGAAAAATTAACGCCAGTCGGAGCAGCCTGAGGCTCTCCCGCTTCTC  
AGCTTTAGCGTCGTCAGACCGAGAAGTGGTTCCCGGTCCTGAGGGTGAAGTGGGGAGCCGAGGACGCAGGCGG  
CGATGTC  
CTAGGCGGGGACCTCCTCCCTACAGCTTCGGGCGCCGAGCGAGCGCAGCGGCGCTTCTAG

>NM\_009820-Mouse-309mchr17\_P014613chr17-4288812142888821mchr17\_00049

agaccatctgagcacagcagcacttttctgattttctagctcaggtgcaaagaggcgcaacaaccttttgcgc  
gctccgggtacctttctggccctgctggcgcgggggagggaaggtcagagagtggaactgcgctaggagggtca  
tgacaggtccctgtgaatttgaaggcatttgcacccagcagtaaaagcccaataatggctacgtgaagagctt  
taaataagacggatggtagaaatgtaccagctagccctctttagtctccttaggggacgactccaattttca  
ttgattcaccaaatcacagtgcgtcaactacctgttcaaatcgccgggattttgtaaaatgattctatttggaa  
gcgttgaagttttaaataataggttaggcaagacatataacagaacatcacgctgagaggtgagccagcccgatattg  
cttctgctggttcttggggTGTATCAGCCTCCGGCGGATTTCCCGGCTTCTGTGGGCGCCGCCGACGTTGTTTGATTT  
GTTTTGAAGGCTCAGAATTTGAGGCTGGTCGGAGACACCCACGTGCTTCTGATTCCCATCAGTATAATGATCG  
CCTCAGT  
TTGAGTCGTGTCTATATAAACCAAAAAACCTAATCATTAGAAATCCAGCCTCCAAAAA

>NM\_009820-Mouse-310mchr17\_P014623chr17-4281418742814887mchr17\_00049  
tataatctgctaccctttccatctctccagttttaaattgcttcaacagtgttaaggatcacactgagagaagtgggag  
ttttcaaaaagccagtgaactttagcataaatgtgtggccactagtcagttttccaggaagcaccaatcagggcctgt  
ttctaaagaaagcctttggctactggcttccgttaatgttgcaaaaagccatgaagcattttgaaggatagtggtgtaa  
tatgatgactgcaccagtaagttttctccaatcaagatgtttctgaaagggagctattgagctagtcaggcct  
gcataaatatttattgagcatctactgtaatgcaggcactgagtagattataagaaccagctgttcaagagacagga  
cactcatttgctgggattcaagtttttgaggagggacaaataatacaagataattacagattgtgacaactgct  
acaaaggaaggtaaaggctGTGCTCCAGAGCGTGGGGACATATTTTGGTTATGGGAATCAGGGCGAGGCTTTCAAAA  
CAG  
GTAGTAGTTACTCTAGATCTAATCAATAAGGAGTAGGCCATACAGAAAAATCAAGATTTTCATCTTAGGAGT  
ATAGGGAA  
GTCCTGGCATGGGAGACTTCAGAGGAGACAGCGCCAGACACTCAGAGAGTCTGAGACTAA

>NM\_009820-Mouse-311mchr17\_P014636chr17-4264753542648235mchr17\_00049  
gtgctcctccagccgctgctccaccttggaggccagtgtggggacatcctggaggactacggacaatgaatggccat  
ctggacatcatagcaaagccctcactaaattggcctcttctggtgccccagctcagcctgtgctgaagcaccaga  
tgccaattaaagagctggatcttctaaacaagggatgctgagggtagcacacatcctcgtgactcctctgatcccgt  
ctttgctggagacaagcaaatcagcagaagagccagttacttagcttggttgtcacacattggatgccttggcctg  
tactcaaaggatagcagtgctctgctggctccacgagctgacaagctgtagactttctgttcccttcaccttcaa  
tgcccctctctgcttaaatccccatagaagaagcaccgagaagttccagggacaaggtgattgaaaggtatcat  
tccctccagtcacgcaaCCCCAGCCAAGCGAGCGGAGGGGAGAGGAGGTCTATCGTCAGAAACACTTCTGGG  
GC  
CCCTCCAGCATCCCTTTCTTGAGATGCTGATGGTGTGTCCACCTCCAGTGGACTCCAGTGGACTTCACATATCT  
CTTCTT  
AAAGTCTCTTTAGGAAAACCAAATTGATTGTTTTTCTCATTATACCTACATTTCAAAGA

>NM\_011613-Mouse-312DBTSS:NM\_011613chr14-7007704070077740mchr14\_00440  
ttggagcatctgccccattgaagtcacttttgagatgaagataaaggcacttgggagggagtctagaatttcccaag  
tcttccaatagccctgaggctatattggaggataactgaggctaaacctcacgattctgatggtggtctctctta  
agatttgagagtggtgtacaggaaagggctcgagcggagttcactagagctgacttttaaatcttacagaggaaact  
gaggccagagatgcaaaggataggggcccagcctagagagccagaaccaaccactggaccaaccacagcctccact  
cagagggcctgatggggagggaggagggggctcctgagagcgaagaagagtgaggagggcgaaggaaaggaaggagggc  
agatgtgggagtgaaagagccacctcctggaggctgattggctctggaggccagctctctccagaggttataagagt  
tagggctgcctggggtaccTGCCATCTCTCCACGTCCCGGGGAGCCACTGCCAGGACCTCTGTGAACCGGTGCGGGC  
G  
GGGGCCGCTGGCCGGGAGTCTGCTCGGCGGTGGGTGGCCGAGGAAGGGAGAGAACATCCGCGGAGCAGGGCG  
CCCGAAC  
TCCGGGCGCCGCGCCATGCGCCGGGCCAGCCGAGACTACGGCAAGTACCTGCGCAGCTCG

>NM\_011613-Mouse-313AB022036S1\_1chr14-7007702870077728mchr14\_00440  
ccccattgaagtcacttttgagatgaagataaaggcacttgggagggagtctagaatttcccaagtcttccaatag  
cccgtgaggctatattggaggataactgaggctaaacctcacgattctgatggtggtctctcttaagatttgagag  
tggtgtacaggaaagggctcgagcggagttcactagagctgacttttaaatcttacagaggaaactgaggccagaga  
tgcaaaggataggggcccagcctagagagccagaaccaaccactggaccaaccacagcctccactcagaggcctgt  
atggggagggagggagggcgggtccctgagagcgaagaagagtgaggagggcgaaggaaaggaaggagggcagatgtgggag  
gaaagagccacctcctggaggctgattggctctggaggccagctctctccagaggttataagagtagggctgcctg  
gggtaccctgccatctctccACGTCCCGGGGAGCCACTGCCAGGACCTCTGTGAACCGGTGCGGGCGGGGGCCGCTG  
G  
CCGGGAGTCTGCTCGGCGGTGGGTGGCCGAGGAAGGGAGAGAACATCCGCGGAGCAGGGCGCCCGAACCTCCG  
GCGCCG  
GCCATGCGCCGGGCCAGCCGAGACTACGGCAAGTACCTGCGCAGCTCGGAGGAGATGGGC

>NM\_019467-Mouse-314DBTSS:NM\_019467chr17-3366871133669411mchr17\_00083  
aggatctgggaaagccactgtctaccgcatccttggttgagacaggttcttactgtgtggcctggctgggtccaac  
tcccaggatcctctagcctcagcctctcttaggtgctagattgcaggcctagggtatcacgctcggtccctcagatcctg  
gtgcctttccacacctccgggagctgatctaagtcttttccacgtacagtctgcttctttggaggagctgtgtggagc  
taggtgtgttacagggtgtagctccagccatctgggaggctgaggcaggatggctacttcaattctcaagagcctggat  
aggagaccctgccccaccccaaaagtaattttcagcacattacttctcatctcctctcaaccggtctgc  
cttctctggggtgctggtgctcagcagaagctgatgtggaagtgatgcctgggagtagcaaggaatgagtggaagg  
gaagtgtgagaacgggtccaGAAGAGACTGGGGAGCTGGTGGAGAGAGGACCCAGCGGACAGACTGCCAGCCTAAGA  
CAA  
CCAGCGTCTGAGGAGCCATGAGCCAAAGCAGGGATTTGCAGGGTAGGGAAGGTGGACCCCATAGTGTCATGAG  
CCAGCGT  
GAGTCAGGCCTGGCTTGGGGAGCCAGGGGGCAGCTGGAGGATCTCAGAGGGCAGCACTT

>NM\_019467-Mouse-315AB036423\_1chr17-3367213933672839mchr17\_00083  
gacttcaaatcacagcagtggaaggctgaagtcagttgttcatcttcagctatgtactgagtcacagggcagcctgggc  
tatatgagattctgttcaacaagatgaaacaagatcatgggctggagagatggctcagtggttaagagcactgact  
gttcttctaaagctctgagttcaaatcccagaaccacatgggtggctcacaacctataatgagatctgacacctc  
ttctggtgtgctgaggacagctacagtgtacttatataataataataaatcttttaaaaaagaaaaagaaaag  
agaaaacaagtagcctgtgggctactgacactgaaagaaatcttggcagtcaggtacctcaagaggactgctggcctc  
aggaaaggctgggacctgtgacctcacagaaggttagccgtggtgataggcaccagttcctccatcctattgttccc  
tgtcaggctcctcaaggccCAAATAACTGGAGCCAGACGAACCTCTGATGTGGTCTGCACAGGTCAGTCTCCTGG  
GC  
AAAGAGCAGGGCTGGAAGAATGGAGGGTAAATAGAAGGCTCTCAGGGCACACACACGTGTGTACACACACAC  
ACTCTCGC  
TCTCTCTCCCTCACTTTCTGGACAGTGCATCCTTTTCCAGGCAGCACAGTCAGTTCACAG

>NM\_019467-Mouse-316MMU560664\_1chr17-3366927833669978mchr17\_00083  
cctgcatacaagggacatagcctggggcggggggcacaaggaaggggctgagtcattggagtcacagcctccct  
cccctggtgacctgactgaggggaccaaggctatccctggtatgaggggagggcatttgcagtagtagaccctga  
cagccatggtggggacaggaagtagctctgtctactgtctctttcagtccttctgttctccaaagtgtctctc  
aaactctcaaatgacttgtagattcagcctaagatctcaaagcaggtgaggcaggaggctggcactcaagagcctgac  
aacacaaaccaagtcttctgggacatgtctcatgtgtcccagtcctctgtagcccctgagagaggttcttctc  
ctttccagggcgctaggctcagctcaccattctggagcagcctgcagacttcatctctcttccatcccggggaa  
agtacagcagctcctcagCTGCCTGTCTTAACCTGCATCATGAAGCCTGAGGAGATTTCAAGTAAACCTCCCAAGC  
C  
CCACCTCAGGATCTGGGAAAGCCACTGTCTACCGCATCCTTGGTTTGGAGACAGGTTCTTACTGTGTTGGCCT  
GGCTGGG  
TTCCAACCTCCAGGATCCTCTAGCCTCAGCCTCTCTTAGGTGCTAGATTGCAGGCCTAGG

>NM\_009773-Mouse-317DBTSS:NM\_009773chr2+118379379118380079mchr2\_00302  
taaaagagaaaaacgagaacacagctttccacagaaacagctgggtgagagtgccctaaggatccctggacaggtgtt  
aagacctgggctcagacaagacctaggcgtagcacagttaatgttcggagcaaccagaagagtaagtactcaaga  
cacgttatgaaactgaaacctcaaagaacctctgttaataaagtgtctctccctgggttcgaaggctgtcttagaaa  
ggaaacacagagcaaaactgaagtgcctgagcagcgtgagtgtaggacaaccattggtccttgacactcaaacctgaa  
actacaactcccattgtgattgctgagcgcgtgcttaaccgggatacactacaatcccagaatgcttgggaggag  
cgggagcggggagcggcgaggctacgtctgctcaagagacgttaaatgaaacttgccggcccgctgctgatgggggc  
gtgaggaggtattctgagaAGGAATCGGGTGCCTGGTTTGTAGGAGCACGGGGTGACGATCTTCGCAGCTCCAG  
AG  
CCAGCTGAAGGTTGAGGGAGACTCAGTTAGCACTCGGAGGATAAAGTCTGCGGAAGGGCGAGAGCAAGTAT  
TGGGAATG  
CAGGATGGCGGAGGCGAGGTAAGGACCGGACGCAAATTGCTGCCGCTGGGTGCTCGGCTG

>NM\_020001-Mouse-318DBTSS:NM\_020001chr6+123881145123881845mchr6\_00708  
cttgattcattccaaaaagtcacaatatagcaaatgtacaccacaacacccttgatgtcacaataccacttctgact  
aatactcacatgtcttgcttaaatgtatgtatgtatgtatgtatgtatgtatgtatgtatgtatgtatgtatgtatgcac  
atgtgtacacatgtgtgaaggggtgaggacttctagatatccaaccaggacaagcagctaaccattcagccattcagac  
ttattgcttctagaatctgtttgatatatgagttaagcctcatatcaactgaataatccacataatgtattgtaaaga  
acatttaatgtaaatacagtttatagacaaatattttgaggtcggagatactccacattaggaactgagaaagtaat  
gagaacattctgacagagtttttaggaacaaattaggtatgtttctcaatttctctttcccatgtctttaaactcagt  
ggagagcagtgacagactctcTGACTTCTGGGTTTGACAGCATTGGCCCCGCTCTGTGGCATTAACTCAAGTGTGTGTGG  
AA  
GTTGATTCTGAACTCTGGCCTCTTTGACAGAAGCCAGGTCCCTGAGTCGTATTTTGGAGACAGATGCAAGAAA  
CCCCTGA  
CCTTCTGAACATACACCTCAACAATGGTGCAGGAAAGACAATCCCAAGGTGAGGTGAGAA

>NM\_009898-Mouse-319DBTSS:NM\_009898chr7-114179200114179900mchr7\_01055  
gagcactactcatttgctccatagccccagcacagaacaggtgctccataatgccagttatttacttctccgggcc  
tcaatgccacgaagcagaggacaaggggtgctcccgtgaagccctaaatccctagaaaggagaaatgaccccccaaggc  
ctcccagaaatccatttggggtaacgacaggagaggtccctctctagcagagaaggtctcaagctggtgaagccgtt  
ctaaagcttctccggtgccagggaaaggacctcagaggagcagcgggctgggggagggatgaaggaacgggatatt  
tttgcttctgacattaaagaagagttgattcgcgtcagcatctgttcgggggtggagctgacagcatggggagcggg  
cccagctctgaccccgtggagcgaagggccgggctccatgagctcccccaggggcgctaccaccggaggaggccg  
gcgacggccgctgctcattCATTGTCTTGACAGAGCATCCTCGGTGGCCAGCCTGCAGCTCCTCCATCCTTCTCTCCT  
T  
CCTCCTCTACTTGGGAGGGGTACGCTCAGCTCTCCGCAGCAGGTGAGGCTGGGCGCCGGGGGAGGGCTGGTC  
ACAAGGG  
CCAGGCAACGCTGCCATGGGCCACCTGTGGGGCCAGCGCCAGTGTGGGGCAGGACTGTG

>NM\_009898-Mouse-320AF427040\_2chr7-114178533114179233mchr7\_01055  
tggggccagcgcaggtgtggggcaggactgtgggactgtggggcggcgagctgtcagagccaccaggctggggacag  
agagccggttgtgagccccgccaggagatcaggagcagggagttcgaaggggcaagtaggtcccagagtctcaag  
gtgagggttaaggacctgtgaccaagatggaggtgggctcctgggagcggcctagctgggctcagaacctatgccc  
ggggaggagcttctgaaggtggggatgaggggtgggtagccaagtagctgacctgagctttgagacaggaaggggt  
tgagtgcaaaacaagactaagttccccttccgtggttccgggcttggtacctgggtgggggagggagccgggtggggc  
acatctccgcccctaccttgattgggcttctctcccaaatccagactgctcactggggtcttgtgtccccttct  
gtcttgagactcactcagGCACTTCACCTGCTTTTATTTTAAATAGACCTGGGAGCCTCCTTGGTGATAACCGGGTG  
T  
GCGAGGACTGGAGTCCCAGCACGAAGGGGCTGAGTCCCCCATTAAGGCAGAGCAGATGGGTGAGGCTGGGGAG  
GTGGATA  
GAGGCTCTGGGCAGGATGCCTTCCACAGCGCAGCCGAGGTTCCCTTACTGAGCAGGAAGG

>NM\_203320-Mouse-321mchr5\_P90035chr5+8959640889597108mchr5\_00658  
agaaaggatgtattcacaagaggactgggtacaaacctcaggtctcccagcttttctgagctgcaaagccttcaccac  
aactgtcacttatttttctctattggcctctcgcacaccagtgccggtttctaccttcaaccttccctcttgc  
tccggtgttttgagctctctgaccaaaggtcacccacaggatgtttctccagcgcaggcacacttctgtccttggg  
gtggggtggggggtttcnnnnnnnnnnnnnnnnnnnnnnnnnnnnnnnnnnnnnnnnnnnnnnnnnnnnnnnnnn  
nnnnnnnnnnnnnnnnnnnnnnnnnnnnnnnnnnnnnnnnnnnnnnnnnnnnnnnnnnnnnnnnnnnnnnnnnn  
ctgagacaggacctggagctgcgggggaattcccagcccgggctcgggctcttgagctcatgtataaaaggggt  
tcgagggcctggagccccAGATCTACCACAGCCCTTCGACACCAGCTCCCGCGCTCCAGACTCCAGCCACACTCCAG  
C  
CTAGCGCCATGGCCCCTCCCACCTGCCGGCTCCTCAGTGCTGCACTGGTCTGCTGCTGCTGCTGCTGCCACCAAC  
CACCAG  
GCTACAGGTGGGATTCGGATTCGAGGCTGATGTTTCTGGGGAAGCCTCAGGTGGGCGCAG



>NM\_009141-Mouse-322DBTSS:NM\_009141chr5+8956955989570259mchr5\_00055  
ggctctgcatgggtgggtgggtggggagccaaacctggacctctgccacagcaaccagttctttaaaggttgagccat  
ctcccaggtgtcagcaatagtgtttgtagtaataacagttaaagacctgtggaaggtttttaaagtaaaaactcttcc  
ttggctccagctctcctacaagaaaagaaggatcctcagagctctgtcctgccttaactagccctgacctaggaga  
gggaaaggtcctctaaggagctgtacccagagcagcagccttctgttccggggcaggactacaagcattctctccga  
ttggcaagagccactcctctagccatctcccggcccaatcccattgccagcccctctgagccccacctcctaa  
ctccaagtcaggaattccccagcatctcaagctccagtttctgcctgaaggaagagagagaacagataaaaagggg  
tgcagtgggttgagaacacCATAGTGCTCTGTAGAGCCCAATCTCCACACCTCCTCCAGCATATCCCGAGCTGGTGC  
T  
CCCTGGTCCGGGATCTTGTCCACAATGAGCCTCCAGCTCCGCAGCTCCGCCGCATCCCAGCGGTTCCATCTC  
GCCATT  
CATGCGGATGGCGCCGCTGGCATTCTGTTGCTGTTACGCTGCCGCAGCATCTAGCTGA

>NM\_009141-Mouse-323mchr5\_P005844chr5+8956843889569138mchr5\_00055  
aggtgttcttattccgaaaacagacgagtggtgggtggatggcggtccatggttacaggggacaagaaaaacagtttct  
ttcaggactatatgtgaaggtgtcatgtttacagacttctctgccggcctactacatggccagaggtttgagaac  
catccagagaggagatctgttaaactctataaagaagccagggcaccacttaattgtataaccgactgccttgatg  
aaggccttttagttacaggaagtcctctatctttcatcaccaggtggcccctccagggtccccaccccaaccccccca  
agcccctggggaaagcatcctcctctgaaactcaagaagttgcttgaggagtcagaacggatgctatctgttgga  
aactgaatcaaaccttgacccaactgcagataagtcacagatgagtcctcagctgcaccaacctctttagctt  
ctaccactgtcaaatcctATCTGGCAGGGGAGCCACATTAGAAAAGCACAGCAAGAAGCCCCTGGTGTTCCTCCGGC  
T  
CCAAGCACAGGACAGACTGCTCCTAACTGAATGGCAAAGGGTGCAAAGATTTTATCTTCCTCCCAAAGCAATT  
TGCTGAG  
TCATCTGTGAAGTTGTTTCATTAAGCCAAACAATTACAATAGCAGGGCTTCCAGTAAGCAG

>NM\_153551-Mouse-324mchr17\_P012604chr17-5540964855410348mchr17\_00639  
caagcatattcaagccaccactgtacaatagcagtagcacttaactatggaactatgtctcaatccctgaagct  
aacttctggggtacagatggaaccctaaatttggaataccgggctgtctgcctgtctcagcaattctgtgact  
ctctcagtgctgtggggagtgctgtgtgcccattgtctcaccttacctgggtctgagcctctctgcatttc  
catcaggattctgtgactccagcagcaacctctgtcagccttttctctcagtcagctgccccttgaaatg  
aaaccaagaagcaacacagggaaatgatgggggtgatcttcacaggtttcaataccaggggactcagaaagaaagggc  
ctgggtgtggccatggggaccataagggtgaagctagactccaacctggcctgtttccatagacctgtccccacc  
taggctgtgaagccaggacCCTGAGTTCCTCACAGAGGGTGGGGGCGGGGCTCCTTTGGCTGGGACGTCACCCCTG  
TT  
AAACTTCCTCTCTCAGCCACACAGGAAACTGAGCAGATCAGGGGCCAGCCCCAAGCAAACACAGGCTCCCCCA  
GCCCCA  
GAAGCACTAGGGGAAAGGGCCCAGCTGGGCCAGCCCTGCAGAGACCATGGGATCCACAGA

>NM\_153551-Mouse-325mchr17\_P012606chr17-5540811255408812mchr17\_00639  
ctcttctcctcctaaactctctctctgttctgtctctgtctctgtctctgtctctctgtctctctgtctct  
ctgtgtctctgtctctgtctctgtctctgtctctgtctctctgtctctctgtctctctgtctctctgtctct  
ctctgtctctctctctctctctctctctctctctctctctctctctctctctctctctctctctctctctct  
ctctcttagaaacaggtctcagatgtagttctgactgcctggaactcctatgtagatcaagcaagcctgaaactca  
cagagatctacctgctttgctgggggttaagggtacgccaccatggcttctctcttttctctctctctctgacc  
ccgtacttcagcagcattcacacctggctccaccctcagggggccacaccaacacacagttacacacgagacaggg  
aacaggaacagagaagcacaCAGATACAGACTCAGAACACACACAAGCTAAAGCCCCCTCACGGTCCACAGAAGGCA  
TCC  
CCCTGCCATGTTTACTGGTCTTTGAAGCTGGCTGCCCAACTCCCTGGAAGAGGGTAAGTTAGGAGACCTG  
GGGCTGG  
AGAGATGGGAGGGAGGGTGTGAGGCCGAAGCTCAGCAGCTGGCCCTCCTACAGATCCC

>NM\_153551-Mouse-326mchr17\_P012610chr17-5540129155401991mchr17\_00639  
aagaataagggacagggcgctagcttggggcggggctctaaaatgagacaaaggatgggctcgggtccctgggggta  
gggcaaattggatgcttctagatgatttctgatttggggggggtggggggcccgctggcaaggctgacttc  
taagtcttagggaacagcagcaagcttagtccgaccttctctctacccaagttcatcgaatcccactggaaa  
aactcaatgctgggaaggcttctcagaccaattgagcaagatcattgctcgcggagcttctcaggtgagccc  
caaggctctcaccggctgggtcccaagcttagcctgcttagtaaccacaactctctcccttctcccaggcacct  
tcggtcttaccagcttgggtagatagcttaaggaataaaagcaatccctgttctgtttataaccaacttcatcacc  
tcaccattaccagccccCGAGAAGGGGCTTGGTTAAACTGGAGGCACAGAGAGGAAGGAGGCTGCCAGCAGAA  
GG  
CAACCTGAGGTGGGAAGTAAGGTGTGGAGTCCGGACCTGGCAACCTCAGGGGCCAAGTTTCTCTTATTTGGT  
GTCTTTT  
CACGCAACCCCTTACAGAAAGGTAGCGATGCCCTTCTGCATTCAATGAAGACAAAAACCC

>NM\_153551-Mouse-327mchr17\_P012614chr17-5539802255398722mchr17\_00639  
ccacacatcagatctcccgaatctgcacctgtccccagttcaccaactatctcccttgggaagttcacatgt  
agttcactcactatacagccaagatgggttgaactctgatccaccatacccagcttaaatggtgctggggattaac  
ccagggccctgtgcagagaggcaagacctgtactaaccagttacactctcccaacccttggggctttttgtattt  
tagacaaactggtctacaactcagagatccacccagccttgtttgttttagaggaatcatccaggacttgaactt  
gcaacaatcctcctgctcaggtcgaatacagtgcatgccaatgcactttcaattcaagctggaaagccctagcc  
ctggattcaaaagctcctgggctctcccatttctctctcttattttcagaacaggccctccgccccagcagg  
agactcaagactgaagaggACCTTCCGAACCCCTGCGGGAGAGGTAAGAATTGAAGCAGATCAAAGTTGAGAGGTG  
CAA  
GGATCACAACTGATGAGGGGTGTCTTCTAGACTCCGGAGACAAAGCCCAGGATGTCAATCCTCAATCCAGGAG  
CCCCACC  
TTGAGCCCTGGGGACACTCAGAACCCCTGGGCAGAAGATACTCTAGATGGCAGCTTTCTG

>NM\_153795-Mouse-328mchr19\_P90153chr19-67326606733360mchr19\_00282  
ttggaccaccagaacctctaaagagacgggataaaggtcctggaggaaatcacattgaggtttatgaggcagagagg  
ctctagatgtcactggacagatttaaggctggtaggttggaaacaagctctgtttaaaggtgggaaggacttactgc  
tgactgtagacagctcccactaagagcaggtggagccggcagtggtggcgcaccagcaccaccaggccaggtggatt  
tctgagttcagggccagcctgtctacagagttagttcaagacagccagggtatacagagaaacctgtcttgaacaa  
caacaaaaataataataaaagaaaaagcaggctggaggtgcaaccagtagatgcctgggggtgggtaagagaaact  
tgtggtgtcaccagcactgttcttctctatttctgtgtaacaaaagcaagggccccctggagccctctgcgtgt  
ggcagtgcttctgtaccCAGCAACAGCCCCCCTGGGGAGGGACTAGTACAACCTTTCATGATAAGGCCACTACAGG  
C  
TGACCTCTGAAGGAAGCAACTGAGCAGGACCAGGCCAGACCAGGGTAACAGGTGTCCCACTGCCACCTGCAGC  
TGCAGCC  
CGTTGCAGGCTAGGTAAGTAAAAGACCCAGGAGGACTCACTTGTCCCCTGCTCCGCCATT

>NM\_133990-Mouse-329mchrX\_P001644chrX+2865569528656395mchrX\_00125  
actccaagtccatccagagaaataaagaaggttggtattactattctaggagtcagaactcggaaacaaagggtcag  
agacctaaggctagatgccaggtttccagatcccaggccaaggttctttctcatgacctgcccctagtgttagca  
gggtgacgctttggcactcgggacaaccacacatcctgatcaaaagtgaggagtagagaaggccagctttggagccctg  
ccacaaagctccaggggaagtcgcttgggtcttcaaagactcccaggtagctgtgacaggtggtggcgcggaggagg  
gccaggtgtcactcgggtgggagctcagagccgcccggcccccaatcccttcaactgctcgcgccagacgccccgc  
gctcggggttacctgcggcctggggcgggcgcccttccgtctgcgcggcttggcctcagcgcggcgggcgccgg  
gaagtgggagcaagaacagaGAGGCGGAGACTGCCGCGGCTCCAGCCGGGCCACGCTCCGAGGCGAGGGGCTGCAT  
GGC  
GCGGCCAGCGCTGCTGGGCGAGCTGTTGGTGTGCTACTGTGGACCGCCACCGTGGGCCAAGTTGCCGCGGCCA  
CAGGTG  
AGTGTGGTCCCCGGCTGGTGACAGCCACCAGGGGGTTGGGGTGGTGGTGGTGTGTGAGA

>NM\_173014-Mouse-330mchr8\_P007281chr8+9220498892205688mchr8\_00109  
ttctaccaactagcaaatgaccaaggcctgggcaaccctggactctcctaccctctcctacaggttcagacagcctca  
tacttctcagtggtcgtcaaacatttccttttctgggtcaggttctctatctacagtagaagccagttgcttttggc  
ttttctatacaataaattactgtgaaagacagccatctccatgtaaatctaggttttgagtggtggtgctctctg  
ctgctaattactgttttagctcgctttcttttaacctacaaacacccccaaatgaaataggtttaccaggaacgaaa  
cacgccggaaatcgagcacagataaacaaccacccctggatttataagttactactagattgggatccaagaggtg  
tgtccaaaagcaggttctagggggcggggccagagcccgggtgctcccggaggggcgggagcagtagtggttaggtg  
actctggcgctcgagcaGCCGGGAGCGGCGCCTGGGGCTGGGAGTCTCTGGTTCTGAGGTTGGGACTGTGAATTC  
GG  
CCGCTCTCTTCGGGTCCCCGCTTTGCTCGGGTCGGGCACCTGGATCCATCATGAACCGATGCGCCGAGGCGGCC  
GCTGTG  
GCGGCTACGGTCCCGGTTCCGGCGTCGGGGACGCCGGCTGCGGCCACCCATGGTACCT

>NM\_175188-Mouse-331mchr8\_P003857chr8+6458613564586835mchr8\_00432  
cctgtagcacaggatcatcacagaacctcagctcccgagaagcaagagaaggatatcagcaaaaaacgacaagaaa  
actttctcttaccttaccttaccactaatttagatattgattaaaagtcaccagaacagaaaatactgttttacc  
taggtctgctccaccatgtgcatcccactcttccctttctgaagtctactctgctctgcttactgactccagctaa  
acaggttctgttaggttctaggaataagtaaagactccgttgctcttctctgctctgttttccccatgtgagtg  
tggattattccagttttgagcatggcagatttccactggatgacatcatgggagcccagtgagtgccgctggtggaggg  
ggacagagaaggggagggctcagaggaggaagagggctggggagccagccagaccaggtgctgctccaccgggct  
gcacgtttgtgagctgaggaGTGCACCGCCAGCCACTGACAAAGGATGGGAGGATGCCACTGCCCTGGGATGCCGGCT  
GC  
GCGCAGCCTGCCGGCCTGAGCTACTTTACCCTCCCCGGTGAGTGATTGTAAAGACCATTTGATCAGCCTTGGGC  
AGAGTC  
CTCTTTGGCTTGTGGTCCTGGGAGGCTTGTCCGTGCTCCAGAGCACAAAGACCTGGCACAA

>NM\_023209-Mouse-332DBTSS:NM\_023209chr14+5779435357795053mchr14\_00111  
ccccaccagccagcccccattcgcttcgggtagttttttattgaagttacatatttaaagtttttaaattatag  
ttgttctatatgtattgtatatgtgtggttagatgtatgccacatagtggttgggtggtcagaagacaactgtgt  
gagttggttctcttttactaaatgagatccaagaattgaagcaagttgacaggctggcagcaagtacctttacta  
agtgtctgagctatgctctgaccgctatatattgtatagttaaaccacaactcactcaatgatagatgaccgtga  
gtaaagtcattgtatctctgggctcaattttactttataataaaattggactatttgctgaggtcatttttaggtct  
caaattgtatattctgtgataaaatgatgttatgggattctcctcacaatgagagtatttagatagttgcaataaa  
ctttgctgttttcattataGGACCTAACGTGATTGCTACAATGGAAGGAATTAATAATTTCAAGACGCCAAACAAATC  
T  
GAAAAAAGGAAATCTGGTAAGATTGCAAAAGACCTTCTCTTGTGCTGTTTCTACTAGAAACATTTTAGTGTT  
TATTCCT  
TTGTCATTGTCTGTAAACAGGCATAAGATTGGTCATTATAACAGTGCTAACCATAACAGA

>NM\_023209-Mouse-333mchr14\_P004956chr14+5779104457791744mchr14\_00111  
aggaggaaggaggagccagtttctgcagttgtcctctgatcttccatgtgggtagcagaaacacacacacacaaa  
cacactaacagcaataatttttaagttagcaaaattcaaaatattctatatttctcagcctcaataatgaaa  
atctacacatttcaattagttttaaaggacacatatatctgcaataaaactcctagttgcatattctgagcaggtt  
tgtaattgggtaatttcctcaaaaagatataatatttttttccgagcatctgtctgacacttgctatgtctt  
tctagccatcgctctggaagatttcttcttttaggactaaatcaaacctggaaactccagtaaactgggaggactgtgc  
gaacgcgtgagtttgacctagtgccgcccgtagttcttctggcgggactttgaaaaagcgtgcttctacacaccgc  
ggcggttactgcaggtgttgCGGGAGGGAGCTGTTCTGCATTTTCTGGAGCGAGTCTTCTGACTGCTTTTAGTTAG  
AA  
CTCCAGTGCCCCCTCGGCGGGCCGCGCCTTTGAAAATGCGCGCGCCCTAAACGCTGCGGCGGTTACGCTGTTGG  
CGGGAG  
GGAGCTGAGCCTGCACTTTCGGACTAGGTGTCCAGACAGCTTTGAGCCAGCCCGTCACT

>NM\_028195-Mouse-334mchr15\_P004613chr15+7892317178923871mchr15\_00169  
tagacactttgtgagacgtggggggggggggggcattttcttaaaaaaaaaaaaaaaagcaaagcccctccccatccc  
tgaatgacttgtcttttccaatgagattgattcaggggagttcagagaggaccctagaagctgggaaatctttggc  
ttatattaaagaggttgctgggtaaagaccgcgccccccagagaaggtccatcgtaggaccttctccccgtgact  
gagcttggggggccataatccacctgtctgtctgtctgtttgtctttatccaccacccccactccccctgcct  
agctctgtcttcttctgcttccccactttccaagtactcagatgccagggtctgagctaactggtgaaactcaactgcc  
tttaggaagtgcgctctgtgtcaggagcctgcgcacagaccctgtggccagggtgacttctccacagggtctgggc  
ggggcaggcaggaaggggcccATGACTGGTCCTCTTGGCTACCCACCAGAGCAGCAGCTGAGCTGGCAAGGCAAGCAG  
CTG  
GGCCACCTTTCCCCTGGGCTTCAGAATGGATGTGTGTACACAGGTAAGCGATAGGTCCCAGCCACGGGCCTC  
AGTCCTT  
TCCTCCGGCAGAACAGGGAATCAAGGGCAGCCGTGCCAGAAGGCCAGGAAAGAAAACCT

>NM\_139200-Mouse-335mchr2\_P031344chr2-5811694858117648mchr2\_01124  
ataatgtccaagccagaatgaaaacaaatcaattgttcagaaatcttccatgtccatgtgaacgactagattt  
ctaaaattttttttttttgagctaaagggcatggctcccagaaggaacaagcctgaatcaaaagtgggggtcaa  
agcatgtccaaacctcagaatctcactgtgagattggcaggagtaggatcttctctccccaccaccaccctaac  
ccccaacctactccatactgcatgtttggtgcatgtagccctgtgcaggggtgggggtgagcccttgcctcaaa  
gaggaagtcacttagctgggtaaactcttttaccttataaggtcatatccagcagcactggaattctctcatgca  
agtgaggcattcccagcccccaaccagccaatgatggcactcatgtgagagcccctattcccccaaggcttaa  
gtagctctctctaaacTGAACAGTTCTTCAAAGCTGTTGGTTCCTGCACACTCACCCTGAAGACCAAGATCC  
T  
GCCTGCACCCACCTGCCTGGCCATGCTTCCCTCCAGTCCAGCCTGCTGTGCAATGAGCCTGGTTGCCAG  
AGGGGG  
AAGCAGACATGGGGTGACAAGGAGGAGTGCAGAAATGTTACAAGAACTGGCTCTAACAGT

>NM\_139200-Mouse-336mchr2\_P90440chr2-5811322658113926mchr2\_01124  
acaaggacttaccagagaacaacctggccagcacctgtgacatttacagcaaaagagtgagtgaggccacagtctgt  
aagtgcacgggggtgctaataataatgagcaaacgggtaggaagcaaatgagcgaactgaacaaagttgtttcttt  
ctttcttctggaatctgttttagtaccgtagccatagagtatcaactctatgttccggctgtttgagga  
ggaaaagtacactgattttttcttttttttttttttaattgtagaaaaggaacgcaaggttctctcaggagc  
actggagagtaggagtgacctctctataggcttgtgcaacagtgctcaaacacagcagtcacatgggttctgttg  
ctttgctacttttgcactgcgtgcagagggctgtgcatcttctctctctgcaaggccaggaaccatgtgt  
ggcgggattaatctttgcccACAATGTCTCTGCAAAGGTTTCTGCAGCGGCAGGGCAGCAATGGCAATTTGGAGTACT  
GT  
GCTGACTCTGCCTACGGCTCCTACTCCGTCCACGGGCCAGCTCACGATGGAAGACAACCGAAGGATTCAAGT  
GCTGGC  
AGACACTGTAGCTACTTTGCCCGGGGACGAAAGCAGGTAAGGTTGCTGCGCTGTCTAGA

>NM\_011347-Mouse-337DBTSS:NM\_011347chr1+164130577164131277mchr1\_00060  
aagtgtcagaaattctcctggattttccctttctacactgctagggttttttttcttcttcttatttttgc  
ttgaccctctgaagtctactggaattttaaccattctctggcatccaccattaactggaatttactgggaatgtg  
gacgagtacaaagcaaaccttcaaaccttacaaccttagattggaactcctgtcataatcaaggaacctgaccctg  
ggtgcatgggtcctgatcctgctcagctgtgggatgtccaggcatgattcacacctgacctgtctccagccggtc  
tcttggaaagattgacctgctccccctggcaacagctcctcctagctgccaacactgttctgcatgataca  
ggcaactttaggggaaaggcgtgatacatttctgaaagcgaataggaagttgtttgtaggcagcctgacatcaac  
gggaggcagcaaaagtataaGAAGTGTGGTTTTTGGCTAGAGGGAAGAAAGCCAGACGGATCAGAGAGGACATGGTA  
AGCT  
CATTTTTCTCTTTATGGGAAGTAGAGGAGTTGAAGGGGCTTGTGTCTGAAGCAGACAGAAGAAAGATTGAGA  
AAGTAAGG  
ACCAGCAATAGCCGTGGGGCTTTAGGCTGAATAGCTTTGGTAGAGTTCGAAGGCATTTTC

>NM\_011347-Mouse-338AF031662\_1chr1+164130493164131193mchr1\_00060  
tcttttgacacgagagacagcgttctcagatagttcatgcttttccatattgctacttcaaaaacatttccagcaatagt  
ccccaaagtgcagaaaattctccctggattttcccttttctacctgctagggttttttttttcttcttcttcttattt  
ttgctttgaccctctgaagtctactggaatttaaccattctctggcatccaccattaactggaatttactggaat  
gtgtgacgagtacaaagcaaaccttccaaaccttacaaccttagattggaactcctgtcataatcaaaggaaacctgacc  
cctgggtgcatgggtcctgatcctgcttctcagctgctggatgtccaggcatgattcacacctgctgcttctccagcc  
ggtctcttgtgaaagattgacctgctgccccctggcaacagctccttctagctgccaacactgtttctgagatc  
aacaggccaactttagggaAAGGCCGTGATACATTTCTGGAAAGCGAATAGGAAGTTGTTTTGTTAGGCAGCCTGA  
CAT  
CAACGGGAGGCAGCAAAAGTATAAGAAGTGTGGTTTTGGCTAGAGGGAAGAAAGCCAGACGGATCAGAGAGG  
ACATGGTA  
AGCTCATTTTTCTCTTTATGGGAAGTAGAGGAGTTGAAGGGCTTGTGTCTGAAGCAGAC

>NM\_011347-Mouse-339mchr1\_P010431chr1+164164885164165585mchr1\_00060  
cagtgtgggcttgcctcaaaatcccctgtgctacctgagcagaaaccacctgaagtcatctttcaaacagtcagggaa  
aagtccttctctgctgtagacagtgacagaaacctagaagaggcaaatgctcagacatcagagggggccacggtgaa  
agactctttatctgtgaaggaagcagtccttaattgattgtttcttttcagaaaccggtctgccaatgtctcatt  
cgatttctcagattccacatgcaagtgcaagtttctgtcacactgactgtaactccatggcatttgggcatttgc  
gaggttctctgtagtttaaaacaaaaacaaaaacaaaaaaggacaggaacctagaaaagaactatgacctt  
cccaccttccacccaccttctgctcgcctcctcacttctccagctcgccttctctgctcgcctcctcactt  
cctccagctcgccttccTGCTCCGCCCTCACCTTCTCCAGCTCAGCCACAGACCCAGGAGCAAATGTTTTCTGCTC  
TGGTCTGTGGCTTGTGTACTTTGCTGTTGCTGAAAACGGGAGAGTCCAAGGCCCTGGAGCATCTTCTCAC  
CAGGTGA  
CCAGGCTCTGAAAACCGAAGGTCTTTCTCTTGGGATTGCAGAGTAGCAATGTTGGTGGG

>NM\_028232-Mouse-340DBTSS:NM\_028232chr17-5186725551867955mchr17\_00384  
aggcccaccgcagatctcgcagcgggctgaacctggagagccagctctctcacatcagctcttctgctgagcctgcgc  
taaactgctgtagtgacgtttgccacagggcgccccggagcacaagagctgctgctgcttgggcccctgacaagc  
cacgccagatctgttggatcttctgctccaactcaggctcaactcgaactcgtcattctctgctcagccttct  
gagagctgggctctcaggctgctgcaacaccaggtctaaccggaagtcaaggacgcaaccagacaagaccagctctc  
aaagtcgctagatcttaggtgtgggaaggcgagccgagccaaggcctcaattccagcctgactccccctctac  
ccccccagccacagctgctgctgctgagcgcgcccagctgatccattccccggggcgggcgctgctctacggaga  
aggcgggccggaggtgtacGTGATGGTGTCCGCCAGCCAATGGATACGCGTAACGCAGAATTTCAATGTGGCGG  
CGG  
TAGCTGCGGAGCGCGGGAGCGGGAGGTTGCATCTGCTCGTCCGACCTGAGTGCCGAGGTACGGAGCGGT  
ACGGGCG  
GCGGGACTGGAGGTATCTCTCCGACCGGACGACGCTTCCGCTCGCGAAAGCGAGCACCC

>NM\_134086-Mouse-341mchr15\_P011698chr15-9707098997071689mchr15\_00261  
caaaacaggagccatccgatgagagggactcaggcttccacgaggcagactcctggtggtggtgctcattggctgg  
tgttaggtgggatttctgtcgccattttaaggagaagcagctgtccagccagtcagtaaggggctgcacttcagac  
aaagagtggggcaggagaagtaacccgaggcgataggttccagcctgttcttttccagggccagcaagggtagag  
tcactggtggggcagcagggtattgtgacagacccttgggttattgtcacactctgagtccaagggtccccaga  
gctgcttgggggggggggggggggactgtaggtgtccaggttccaaaggtgtccccgctgctccctgtagtccacc  
cgccctgggtgctgctggggtacctcagctgctccttccacaatgcaactcctgctgaggtgagccctggcgtacctc  
aagagacggccccctgcccCGCCTGGGCGAGTGAGCCGCTCCACCTCCAACCCGAGGGTGCGGGTGCGGCAGCTGT  
GG  
CCCCAGCTGAGGCCCCGGGAGGGCGCAGGCAGGTGCCGGGAGGCCCGCAGCCTCCGTATGCTCGGGTACCACCA  
GCGCGT  
TGTTCGCGCATCCGCTCGCACTGCCCTTCTGGATGCTCGGTGTCCGCCAGCCGCGGTCCG

>NM\_134086-Mouse-342mchr15\_P011715chr15-9707040597071105mchr15\_00261

gcaggcaggtgccccggaggcccagcctccgctgctcgggtaccaccagcgcgtgttcgcgcatccgctcgcactgc  
cctcctggatgctcgggtgccggcagcggctcgccttgcggctggtagcccagggggaagaggagcaagaagggc  
cggcgaccagcggcatgtgaccgcactgtctaccgacacagctcaaatccggcgcgcgaggcaaaaaggatgat  
ggtctgaaagccgctcctcccactccgaagagaagggcagcgcctcgcaggagccaatgagtcaggtt  
ggagcccctcgcggcggcggtgtaattgaaannnnnnnnnnnnnnnnnnnnnnnnnnnnnnnnnnnnnnnn  
nnnnnnnnnnnnnnnnnnnnnnnnnnnnnnnnnnnnnnnnnnnnnnnnnnnnnnnnnnnnnnnnntagtccttgacacaaaaaggacatcta  
actgccggggcagcgcctggaAGGGCGGACACTTTGGTGCGCCTTTCCCTTATTCTCGAGGTAAGGTGCTTTTGA  
GG  
GCAGAGGGAGCGGCGACTTGAGGGAAGGGGAGTTTGAACAGGAAGGAAGGAGGTAAGTCAACAGAGCCTCC  
ATGTCTCG  
TGGACACGGCAGAGCGTCGCGGCCTTTCTAGAACGCAGGAGTCCGGTGCCTTTCCCT

>NM\_011607-Mouse-343DBTSS:NM\_011607chr4-6237428462374984mchr4\_00014  
tgggtatctcaagctggccaagagaaaactgaactgccccgggctgtcaactcctcctgatctccttccaggga  
actcaggttcagcctcaggcttctcggaggtgccacccgcagctgtcccagagcctgagggaaccaggctggt  
ttcagcttgctctagtccaggagcagcgcaggatccagttccctcatatcccagttccaaggctctgttccacaat  
tagaatactatttgaggagaatgcaaaaacacactcactaacactactctgcgggggaggaggagctgaaatct  
ctacttttttctcactataaatgtatgcaaatggtccgttagctggcgcgctggagtgagtgctctttc  
atgagtaacctgttccgctgggagggctgtgccttaactcaccaactgaaaaaaaaaagtgggaaaggatgctg  
gaggcgagcgtcccattacAGAGGAAGGAGCTCCCTATATAAGCCTGCCAAAGCTGGCTGCTCCGGCCACAGCCTGC  
CT  
ACTGTCACGCGTCTCTCCCGCGCGCAGACACACCCTAGCCTCTGGTGGGCACAGACAGTGGCTGGGAAGACG  
CTAGGG  
ACCGCGCGCTTGGAAGCTCGTTGTGGCTTAACCCAGGTACTTCTTCACGGAGCTGGTGCA

>NM\_011607-Mouse-344MMU19460\_2chr4-6237423362374933mchr4\_00014  
caactcctcctgatctccttccagggaactcaggtcagcctcaggcttctcggaggtgccacccgagcgtgctg  
cccagagcctgagggaaccaggctggtttccagctgtctagtccaggagcagcgcaggatccagttccctcatat  
cccagttccaaggctctgttccacaattagaatactatttgaggagaatgcaaaaacacactcactaacact  
ctctcggggggaggaggagctgaaattcctacttttttctcactataatgtatgcaaatggtcgttagctg  
gcgcgcgctcggagtgagtgctcttcatgagtaacctgttccgctgggagggtgtgcttactcaccaactg  
aaaaaaaaaaaagtgggaaaggatgtctggagggcagcgtcccattacagaggaaggagctccatataagcctgcca  
aagctggctgctcggccacAGCCTGCCTACTGTACGCGTCTCTCCCGCGCGCAGACACACCCTAGCCTCTGGTGG  
G  
CACAGACAGTGGCTGGGAAGACGCTAGGGACCGCGCGCTTGGAAGCTCGTTGTGGCTTAACCCAGGTACTTCT  
TCACGGA  
GCTGGTGCACCCAGAGACTTTGCTTTTCCCAGCTGGAAAAGGTGAGTCTGTTGATCCCA

>NM\_011607-Mouse-345mchr4\_P029873chr4-6233273862333438mchr4\_00014  
tggattactagaaattccattttccctttaaactaatgacagccttacttttattgttttaagatcccaggat  
ggtggactcattattgacatcttctaggaggtgttttattacagctccttgcctcctcagtagccaggaga  
acggcacttggtctgaaacctgacagcgtccttctacttattttagtcatgaagcgtctctggctcctctgggt  
gatccagggtcccttttagcttattagcagtaacctaccgacttctcctctgctacttaattcacggactgaact  
gcagagagaatctggagataaaaatggttctcctgtatgaaaaatgacacatccaatccagcatgaagtttcaaga  
tcgttgagtttccaaagtgacagacttagcttcccatttattagatgcatgcagcagctacctcatctact  
gcagtgtgctgtggttaaGAACGCTGTGTCACATGACCATCATAGCCTGATTGACTCCCACACTCCGTAGAGTCTTT  
G  
GAGAAACTAGAAGCTGGGACTATCAGAGATCAGGATGTTTCAAGGGTCACTAGCGCTGGTTCATGTAACACAG  
AAGTCACC  
CAGCTGACCCCTAGCCATCTGAAAGAGAATGACAATGAGGCAATTTAGAAATGTCATGCA

>NM\_011607-Mouse-346mchr4\_P90177chr4-6234802862348728mchr4\_00014

attataattacagttaggagtcattgaacatctcctgcagctacacttcacaggaccagaaaaattccctcagaaggcg  
tggcttgtaataactgagggacaaggaatgatctcatcggtcagccttctaaccctgccattggccaggatcttctactg  
taaaaagtgaacaagggacaaaagtaagtaactccctaagtgctcagatccgaagctgatacaagccctgcctac  
ctttcctaattgttctgccaggcttttcttctctattgtctcttaccatttcaaaagggtgagtgagtaagtcaatc  
ttcaaaattgcaagattttctagagaccattttatgtcctcattaccatatagtaaagggatcaagaaagtttc  
agaccagggggcaagaaggcaaaaatcactcggaattgtggcactccacagtgtattaggacagtgccctaataacta  
ttgtttctttatttatagATCCTTCTTCCAAGAAGATTGGGGACATCCAACGTATTTCCTTTGAGTACATCTAAATAC  
CAAACCTACTGGGAGTTCAGGCACCCTACAGATCTAGAGACACCTAGCCAGTCCAACCTCCACCATGGGGGCC  
GTGACC  
TGGCTACTGCCAGGCATCTTCTAGCTTTGTTTGCCTCACTCCCGAAGGTGGGGTCTCT

>NM\_009398-Mouse-347DBTSS:NM\_009398chr2+5199759651998296mchr2\_00065  
gctgggttgccaagctacatacacctttgtactttgtataaatcttcacagacttattggcaatgtatagcaaaaa  
ctaaagcgatactatcacactcaagaccagaagattagggtcaagtcacagactcccaaaattaacaattcaaacaggac  
cttcaggatttctcagagaattccgctggagtcggctttttttttttttttttaccgcttctaactgcaacaa  
acgccacaaactttctaactgaaaagtgctggtagcagacaaataaacgaactggttctgagaaaagagactttaa  
cgtagatgctcatccccgcctcgttctggtgccaatgcaaatgagtcagagggctgctcagactgaactaat  
tgtgtaactccgaacggaaagtgcattggagaatacatgctgacctcacagccgaaaaaaactttaaagatgtgg  
aaaccagatgtttcagccgATTCCAGCCGCTGCTCTGAGAATTCGTGTGGGCAGCCCCGACATTGTAACCGGCTCTG  
C  
AACCGAAGAGATGGTCGTCCTCCTTTGCTTATGCGTCTTGCTGTGGGAAGAGGCTCACGGATGGGGATTCAAG  
AACGGGA  
TCTTTCATAACTCCATATGGCTTGGTAAGAACTTCACTCGCGAGCTTCATGTTGGGAAT

>NM\_011627-Mouse-348DBTSS:NM\_011627chr9+8627264186273341mchr9\_00131  
agagaggagactttctgaatctccctcacaaccaggcgtttgcccggcgatgtaacctgtcagctccttctctac  
tgctgctttgctcagcttaaaccctctcctcactgcagcggtgccaagaagcagcgtgaattccaagaggtccaccag  
cggttttgttctgcccaggttaaatacgtatgcaaaatacggaaaccaccaaggatgccggggagggggaacagaagg  
ggaatccctcaccttctcgggatgcgttctcattatctccgctaggggagtcgccagcctaggttggccctcgat  
ccctccctgaagcccactctggggcagcagaggtggccagcgcggcgggatctcctctgagcctggcctcccccg  
cccccgcttggttttcccagcgtggaggtgggcccagggcctggggtgagaggagagtcggcgcccgagcagga  
gctgggaaggcgcgtggactCGGGTGGCCCTCGGAGTTGGCTTTGCAGGCGGGGTGCGGAGGTGAGCAGTGGGGAC  
CG  
AGCGGCCAGGTTTGGAGCCTGGAGGCGGGACCAGGGTTCCTTCTATACTAGGGCGTGAAGAGAGCCGGGGGG  
GGGGGG  
TCCTGGCTGCCACACCGCCACGGTCCCACGGCCGCTTTGTTGGCGGGTTCCCTCCGTTT

>NM\_011627-Mouse-349mchr9\_P007594chr9+8627211686272816mchr9\_00131  
agcagataagacttttgagagagcaatgagagggcgttcgggactccaactctcagacttaatacattgttctta  
taagcattccagtcgtttccctaatacctatccggcgctgccagcggcctgggagacagactttgggacaaacttc  
ttcccaggtcagcccaccctcccggcgagcgtccctcgtaagtgacttggctgacacaaacgcaccgcatct  
gggtagggagctttccgggtgactcagcttggcaattgttcttgggtggttttagctgcaattttcttc  
ctctggttttaatttgagaggagggggaaaaaaccaccataatgaatcaagaatgagtgctcttccagtaaccctc  
ccccactttaaagttgactgtctttacaagtttgataactacctagacgtgcggggcgccacaggttaggaaggcatta  
actaactacctataaactgAAGTTGCCAGCCAAACCGAGCCACGAGAGAGGAGACTTTCTGAATCTCCCTCACAACCC  
A  
GGCGTTTGGCGCGGCGGATGTAACCTGTGCAGCTCCTTCTTCTACTGCTGCTTTGCTCACGCTTAAATCCCTCT  
CCTCAC  
TGCCAGCGGTGCCAGAAGCAGCGTGAATTCCAAGAGGTCCACCAGCGTTTTTGTCTGT

>NM\_011627-Mouse-350mchr9\_P007606chr9+8627370886274408mchr9\_00131  
gtgggcccgaagaggttagccttagcctgggagtggggaccgctcccactagggaaggacgcacagaagctt

gggccgggttctagtgtggggactacttggtctgtactcggggagctcggccgtcactcctcctcacgcttctctccc  
gctgtccaggctcgtcatccgatcctgccctgagagaggcgccaacaaaggagttgaggaggtgccaccaccaccagc  
tgcggcgggaggaggagcgccaagggcctgtcccagaccgctgctgactcactggagggaagggcggggtgctgctc  
cgggagggggacgcccgggtgggctcggggttagccaagtccagcttttggcgtcccctcctgtctcccacgagggaaa  
gtttgctgacgcttgcggccgctcgcgcccggggccaggcggtcgagcttccggagcgggctgtcccagct  
ccggggaaccgcgagccgcgATGCCTGGGGCGGGCTCCCGGGGCCCTCCGCCGGGACGGACGGCTGAGGTTGGCAA  
GG  
CTGGCGCTAGTGCTGCTGGGTTGGGTCTCCGCGTCGGCCCCCAGCTCTTCGGTACCCTCGTCTTCCACCTCCCC  
GGCAGC  
CTTCCTGGCCTCGGGGTCTGCGCAGCCTCCGCCAGCCGAGAGATGCCCCGCGGCGTGCGA

>NM\_009504-Mouse-351DBTSS:NM\_009504chr15-9836808198368781mchr15\_00425  
accagtagagtccggctgagcgcctgcaggagaaactcacctgaggtcccatccggcgcgcgagagaacggctccc  
tgcagcgcgcggcgctcggggtcccgggtcaactcaggtacgggtgacacacctggggaggcggttacagcagatt  
gggtagaaccacggcggcaggggtgggtgggtgctacatcacggatcatcacaggcagaaactggatttgacacacga  
catcatcaatactgttccacggaaggcagacgctgtgctgactgtggctggcgtcctggagcccctcacaaggcag  
ggcctccaaggcagcagtgagtggtgattccaagtaagaaagttcagggctcagaggactgaactagtgggctg  
gggtgaggggagggcggtccggggcggggcttgcggggcggggcccaggtgctgagcagctctgctgtcaaaaag  
ctgctgccgagccctaagcaCGGGAAGCGCCGAGCTGTGTGTCCACCGCCAGACCAGGTGCGGATCGGGGTGCAGGGG  
GA  
AGGGGTTCTGGGTGAGTGGTTAGACCCGGGGCAGGCGTCTGGGATCTAGAGGTCTCAGCGTTCGGGTGCAAG  
CGCTAGA  
GTCCAAGACTCGGAAAGCAAAGTTGGCGACTGAGATCCGGGCTGTGGTGCCATGAGGTTG

>NM\_009504-Mouse-352AF017779\_2chr15-9836807498368774mchr15\_00425  
gagtcgggtgagcgcctgcaggagaaactcacctgaggtcccatccggcgcgcgagagaacggctcccctgcagcg  
cgcccgggcgtcggggtccgggtcaactcaggtacgggtgacacacctggggaggcggttacagcagattgggtaga  
accacggcggcaggggtgggtgggtgctacatcacggatcatcacaggcagaaactggatttgacacacgacatcatc  
aaatactgttccacggaaggcagacgcctgtgctgactgtggctggcgtcctggagcccctcacaaggcagggcctcc  
aaggcagcagtgagtggtgattccaagtcaagaaagttcagggctcagaggactgaactagtgggctggttgag  
gggcagggcggtccggggcggggcttgcggggcggggcccaggtgctgagcagctctgctgtcaaaaagctgctgc  
cgagccctaagcacgggaagCGCCGAGCTGTGTGTCCACCGCCAGACCAGGTGCGGATCGGGGTGCAGGGGGAAGGG  
GGT  
TCTGGGTGAGTGGTTAGACCCGGGGCAGGCGTCTGGGATCTAGAGGTCTCAGCGTTCGGGTGCAAGCGCTAGA  
GTCCAAG  
ACTCGGAAAGCAAAGTTGGCGACTGAGATCCGGGCTGTGGTGCCATGAGGTTGGGACTCT

>NM\_009504-Mouse-353mchr15\_P011490chr15-9834830598349005mchr15\_00425  
gaaagtcttgcagctctacctggctcaccatctagccctcagctcattctaggctccctgtgttctactttccagag  
tctccccc aaatctgcaaggggagcaggggcatcctgtctgtctcagacaggggagctatgtgggaggaagcagaaggg  
agaaaggagatgggacatgcatccaggaaagaccgagcacacgggaggacccactgaccaggaggagctctaattc  
ccaccctgttccaaatgccaccctcgttctgcaacagttgctgcccgttccctctgccttaaggacagccattct  
gattgctatccagttcactcctcatcatccctgacagcaacagctgtcccaaacacttttctctgtttttatctca  
ggcctgaattcccctggcaggtcttctgcccattgtgggctcctaaaggactggttgggagatcgaagataccttgg  
gtaaaatgtctccccttgtTCATTTCCAGAGTTCTTTTGGTTGGACAGATCTGTGAGTCTTCCAGGAGAGCACCTTG  
G  
GCTCTGCTCGCCCCTGCTCCTTCAGGTACGTGTGTCCTCAACAACCACAAGCTCTTTAGACGTCTCTGTGTGTT  
TGGGTG  
GCAAGGAGAGGTCCTGAAGAGTACCAGGCAGAGGGAGGGCAGGAACGCTGGCCAGCCTT

>NM\_144547-Mouse-354mchr15\_P009147chr15+102926353102927053mchr15\_00232  
ccatctcaccaggcctactctgaaaatttcatatcttctgatttttgagttgaaaatgagatcagctgggctg



ggtggcgcacgcctttaatcccagcatttgggaggcagaggcaggcagatttctgagttcgaggccagcctggctacag  
agtgagttccagtacagccaggactacacagagaaacctgtcttgaaaaaaaaaaaaaaaaaaaaaaaaaaagaaagaa  
aaaaaaaaatgagatcaacttagttgatctgtgagcttctctgttcaggatgtacagatctgagtttccatccatggg  
aacatcttggacagagctgagcgccttaaatgttgacatcttctgaaaaagggcagaaggccagcaccttctcca  
aggctagtagggtagagatttctgtagtcaattatcacagggttctcagctggacagccaaggcccttctcccctctc  
cgaggagaaaaagaggaggtAGCTGAAGAAAAGATTGATTCTCTGCTCCTCCCTTTCTCTGCCTGTTTCCCTCACACC  
CA  
CCTCTCCCCACAGCAGCCTTCTCCCCACAGAGACCGGGATAGGACAGAGCGGGGCGGAGTTGGGGATTGAA  
GGCTTGG  
AAGCCCCACAGTGCCTGTATTTGTAGGAAGCCTTGGCTGAGGTAGCTGTGCTGGTTTTT

>NM\_175177-Mouse-355mchr16\_P002888chr16+3129371831294418mchr16\_00476  
ggagtcacttatgggtggctgccctgcagaccacgcacagtctattggagaaacctgggaagtgatgtgtaa  
agacctcagaagaaaaaaatthaagtgcggtccttaaatgacattcgaagcaaccaactaacatttagcccc  
gatgactttaaagacagcaatacaaaagacctggaagaagtctcgtcctctacgcggttcttacttctggagcgg  
caccatctcccctggttttgggggtgggggtgggggctgaaacctctcgcacctttgctcccctcaggatccagga  
agcgaagatcagatgacagcagagatctgaccaggtggatcaggatggcctgcatgagcaggtttacctccggggt  
gtctagagattatgggacccttactggagcagagccagccgggataagggaggtaaggaggctgagcctgagcactc  
cccgcctccgctgtctgcCGTCGGGCCCCGGCCGCGCAGCCCTAACGCACGCACCGGAGTGTGTGTAAGGCACATC  
C  
GGGTGTCAGAAGCAGGAGGCCGCGTTTTAGGGGTCGGGAGAGGGTCTTGGAGAGCCTAGGCAACGAGCCAAC  
TCCAAGC  
CAGAAGCGCGAGCACCTGCAGAGCTACGGGTTTCAGACGAGCGCACCCGTCCAGCCCTTGC

>NM\_007938-Mouse-356DBTSS:NM\_007938chr16-6086141660862116mchr16\_00563  
aaggcgccaggcaccagtagacttccagcgtcagtgactcctctctgtagccttctctcctatgcttccaaggac  
tcagaacgggagaggtggccacaaacctcgggtggccaagtttgggaggctagcactcagacacgtcagggtgaccacta  
ccttcgcaagctgtgccccggggccaggagcgtgactgcaacctcacccttctggtagcagaaatgtctcaagg  
gaaaggtggtgtccagagctgagagcacatcgttacctgggggaggggggacgcaagtgctgggggactaaggtagctt  
ccgtgataccaataaacagctgctacggccgagggggggcggcgagatgcccggagtggtggtcacgaggcgacact  
cagcccaggctactcagcaagaggctgagtgctcagtcggccctcccaggaccacttgagatcccgtgagcctcag  
tcgtggtttcccagacacCAGACACATGAAAGTTCTGGATGCCAGACTACCTTACTATCTGCTGTGCCTCCTCTG  
C  
TCTGGGTCTGTAAGTGCCCACTTGGATGCAGAGAGCACTTGGGTCCCAGAACTGCACCTTCACTACCCGTCC  
AAACGT  
CCCTACCCATCCCCAGTACCGCCTAGAGCCACCTCCCCGTCCACCATCCCCCTCCCC

>NM\_007938-Mouse-357mchr16\_P008743chr16-6086236960863069mchr16\_00563  
taaactaggatccgaccacaaacagcactgagcagcggaaatccgaggaacctgcttccattccagattcctg  
gtaaaacgttgaccttagactacaacttaaggttctgtcacaactattcccagctgaacctccaccacctgaa  
aattatcctctgaaatcgttacttcttccagcgtcatcaaaaaccttctagtgtattgaagaaagaaaaagaa  
aaagaaaaaaagccttactcaggcttgataatctgctccttcaataaagaaaacgataataatgtaacaaatacac  
tacagaaaatccaacgccagtataagccttaacaaacattgtaagttaacctgaaagcatcctcagcttttccg  
caggttagcctgcttccacctgagcagctggaggaatgttgggttactaaccctctagcggcaattggct  
gcaccggagccagctgctGTCAGACGGGAGATCGCTCGGCTCCACCGAGCTCAGCAGAGCTTAGGGCCCTGCCCT  
CC  
ACGCACCCCTCTCGGCCGCGCAGGGCGACAGCTTGGAGACTGCAGGTGGCAACACCCTTCCCATCAGCTAG  
TCCCGT  
GCCTCGGCCAGGGCGGGTCCCACCAAGTAAGTAGCCAGTGAACCGGCTTAGGAGAGCC

>NM\_008057-Mouse-358DBTSS:NM\_008057chr1+5988517659885876mchr1\_00885  
atcagaagaggcggctcagtgggccggggctcaaggagagaaggcggagcagcaccaccgagcggcggggc

gagcaggcagggacgcagggcgctggcctggcggaggcctggctcggttaggggacgtgcgtatcggcgtgccccggg  
gctcgagaaacttgggcaaacttgaagggtaacgggagaagcttgttgcctgcgcgagagaaagccgcaccgttac  
gtctcggcggggagggtaaggcgacaccccttcctcgateccccactccaggcccaggagttgaacctcggcggtg  
cgtgagtccacgcggaggcggtgcggcgccccctggctggcggcctcgccccgctgtgcaggcacccctagcacct  
cggctccgcgccccacggcccggccccggcgccggaggactctcatgcggcgggcgggcgccctccctgtatcc  
aagcctctccccagcgcctcGTCTTTTTCTCCAGCTGAGAACGCCGCTGCACTCGCGACCGGCGATGCGGGGCCCCGG  
C  
ACGGCGGCGTGCCTCGCCCCTGGGCCTCTGCGCCCTGGTGCTTGTCTTCTGGGCGGCTGCCACGGACAC  
CCGGGC  
TCAGCCATATCACGGCGAGAAAGGCATCTCGGTACCGACCACGGCTTCTGCCAGCCCAT

>NM\_008057-Mouse-359mchr1\_P003236chr1+5988369159884391mchr1\_00885  
ttgctggctcctgtgagagggcagaggccccttagtaacttctgaccggctcggggcaatcagacaacgcgcacgagcgc  
cagtgcctggagcggggttaagattgaccaagaacaaaagaaagcttccaatcagaaaatgtaacccacaaggaaaa  
taaccctcttgtgtcgaagcccttaattagcaaatgcctgtcttctaacgcgcgttaaaacatttctatgtag  
attccaaatgaaagatcaaatggttcttcaacgaagaaggggtcctgaaggccacacacctcagaaaaaaaaa  
ggaaaacggggcaaccgaaggcgtctgtaaatcgtacagagttccgaggcctcggctcaggttacttccataagcat  
tccccagagctgcttggagttaaaaaaaaaaaaaaaaaagagcctcttgggtccccaggctcccagcagta  
tgtccgggaggggtggcaggCTCGTGTGTGCAGCGGATCCCCAGCTCTGGGCCTTCTCCTCCGAGGGTCTGCACTTCC  
TC  
CCGCCACAAGTCCGCCCTCGGCCGACTCGGGTTTCTCCCTCCAGGATGCCCCCTTTTTTGTAACTGGGGGAG  
GGAGAG  
GGAATTGTGCCTTCACGTGGTTCGGTTGGGGTAGGGGAAGAAAAACGATTCTTAGTCGCA

>NM\_008057-Mouse-360mchr1\_P003239chr1+5988444059885140mchr1\_00885  
ctgcaggcaaggtaactgactccgggtcacgtcttctgcctggctgtactattctcagcttctcccaagcc  
ttcggcgaatgcccccttggctcgaatgtgtattttaggtaccgggaagaggaaccaatctacaggcaagtccc  
ttctgtgtcgtttttctccctgagcaaatctgggtaaaagttttcctaacttttctcagctccccgcccctc  
ccctcaggaatccgcccagagctcttaagcaccgctcctgttctcggcggcccctccgactccaccaatcg  
gaacaggtccacagagaaaaaaagcgcgctattggatgtccagagggtcggggccgccccggagtggttgtgaat  
ggggggaggggagggggcgggcgccgcagccctgcaagccgacgcttctctagccaggctcggctcccaggcg  
ttactccgctccttccctGGCGGGCGGTGCTGGACGCGGAGAGTCGCGGGCTGGGACTGCGCGGGCAGGAGAGGCC  
G  
GGTGCAGGCAGGCCGCGGGTGCAGGGCCTCGGCCTTCGGATTCCGTGCAACTCCGTTTCCAAAACCAGCTTG  
TCCAGC  
TCTTACCTCCCAGCACCGATCAGACTCAAAGCGAGAACGAGCCATTGACTTGAAACTT

>NM\_008703-Mouse-361mchr10\_P90006chr10+1447404914474749mchr10\_00725  
aatgaaaacagattcgccaccctcagttctacacagttgtaccacagatcgggtggagagaagagcaaagctgtgagg  
agaacacaagatgagagagtttagtgagctttcagtgatgacttccgttccactggggcggggggtggaccagat  
aggcaggtatggctctgggtccacaggactgaccttgttctcccgtcttaatagcggaaactaagcctaaagat  
agaaaaaggtctgctgctttgttttggagtttaaatcgaaccagcggcagtgaaaggaaacctctcctagg  
ggaagctctggagcgcagcgcacagacttctgacaggacgagcgggtggctcagctccaggagccaaaacttgc  
aggatcagagacaaattaactaaaccacgtcgtgctcacttctcagacgcgagtgcaagaaaactcctgca  
gttccctgggaaaagaaaccATGCCCCCAGGTCTCTCTCCAACCTCTCCTTTCCACAGAGGCGAATGAGAGCGAGCT  
G  
GTACCCGAGGTGTGGAAAAGGATTTCTGCCGACTCAGATGGGACCACCGGAGTTGGTGATCCGCTGTG  
TGATAACC  
ATCCCTTACCTAATCATCATCTCGGTGGGTTTGTGGCAACATCATGCTGGTGAAGAT

>NM\_174918-Human-1hchr19\_P90015chr19+76470137647713hchr19\_00435

gagaaacctggagttccaggtgcagagaaactgttctccagggttctttttagacagagttccctctgtcacc  
cattctggagtgcaatgggtgatctccgctcactgcagcctccgctcccaggttaagcattctctgcctcagcct  
cctgagtagctaggattacagcgcctgccaccagccagctaatTTTTgtatttttagtagagacggggtttaccat  
gttagccaggctggttcaactcctgacctcagatgatccaccacctcagcctcccagagtgtgggattacagcgt  
gagccaccgcacccagcctcctccagggtgtataaaagcaggggatttggggaggagggaaggatgtgggtctgtcct  
cagtcccagatgtgggtgtggcgttcagtggttagttccggtgcctcacatctgtgctttcctccacggggactgt  
agaagtagaagaacttcttGGGGTGGAGCTGAGGGGTGGAGCTGAGGCTGGAGGGAGGAAGGTGTGGGGGGACCCA  
GGG  
GTCCTGTCTCCAAGCCTGGTTGCTCTTACGCGAAAAGTTGGGACTGAGGTGTCACAGCTTCTCTTTTGAAA  
TGGAGAG  
GAGGTAGGAGGGTGAGGTCCATCCAGGTAGACACAGACACACACAGAGACCACAGCTTCC

>NM\_005099-Human-2DBTSS:NM\_005099chr1-157981717157982417hchr1\_00831  
tattgttcttccctcttgatgctccttacctgttccctaccctctttctcagcagctcactcagcccctcagccc  
tggaaccagccactagggcctaaagggcagcatgagggagccttgagaaaagagaagccatggttaggttagactataaga  
gcaggaattctccaggaccgtgatctatctgtgatgccggccagggcctttcctcactctctgctctcctggggc  
tctgtcccacaaaaggaaagagacagctgagggctgattgtggggttgggaaaaggctatgtcatcagctggccca  
gtgctattatccattcggtctagatattcccctcccggcagctccatttttgggaaagcagatgatacccca  
tctgagtcaccgacagagctcagctgagtggttagagatcagccaatcaatcgagaggtcaccatgcttaaaaga  
gctggcgcggagagaggctgGGGAGAACCACAGGGAGACCACAGACACATATGCACGAGAGAGACAGAGGAGGAA  
AGA  
GACAGAGACAAAGGCACAGCGGAAGAAGGCAGAGACAGGGCAGGCACAGAAGCGGCCACAGAGTCCTAC  
AGAGGGAG  
AGGCCAGAGAAGCTGCAGAAGACACAGGCAGGGAGAGACAAAGATCCAGGAAAGGAGGGC

>NM\_005099-Human-3AB039835\_1chr1-157981290157981990hchr1\_00831  
gagtggttagagatcagccaatcaatcgagaggctcaccatgcttaaaagagctggcgcggagagaggctggggagaa  
cccacagggagaccacagacacatgacagagagagacagaggaggaaagagacagagacaaaggcacagcggaaaga  
ggcagagacagggcaggcacaagaagcggcccagacagagctctacagaggagaggccagagaagctgcagaagacag  
gcagggagagacaaagatccaggaaggagggtcaggaggagagttggagaagccagaccctgggcacctctcccaa  
gcccaggactaagtttctcattcttcaacgtcctcagccttctgaaaactttgctctgacctggcaggagt  
ccaagccccaggctacagagaggagctttccaaagctaggggtgtggaggacttggtgcctagacggcctcagcctc  
ccagctgcagtaccagtccATGTCCAGACAGGCTCGCATCCCGGGAGGGCTTGGCAGGGCGCTGGCTGTGGGGAG  
CC  
CAACCCTGCCTCCTGCTCCCCATTGTGCCGCTCTCCTGGCTGGTGTGGCTGCTTCTGCTACTGCTGGCCTCTCTC  
CTGCC  
CTCAGCCCGGCTGGCCAGCCCCCTCCCCGGGAGGAGGAGATCGTGTTCAGAGAAGCT

>NM\_005099-Human-4hchr1\_P036996chr1-157984441157985141hchr1\_00831  
gctggcagggtcgttaccgtcgaactgacaacatccgggtcctgtgactcggttacttgcgttagataacagtgc  
cgcggtcatcttactgagggcggttctcccacagctcctggctggctttctaggagcagcaagggaaaattgccgt  
tcctgcgtggggcagatactctgtctctcgcagcccctgcgtatcttgaaaacgcgcggcgttctctcccta  
ctccttccgcttggccgccctcatgctttagtctgctctcggattgtatctgagccctgcccttatagggtagcccc  
aggctttgccattcttcccatcactgaatccaaaagacaggagttgggaaagccagctaattccagatgtcataaa  
ttgagattggagaaaggagcctaagtggtgggtggcggtctgagagctcccgcaaacacaaaagaaataggat  
gccaaggcccgccattggTGGTGCGGAGGGGAGTGTGGGGTGTGTAGGAGCCACCTCATCCAGATGGGGGAGT  
GGA  
GGTCTCTGTGGGTGACCCTGACATCCTCCAGGCTTCCCGAACCTACAGAATCACAGACCCAGGAAGCGCCCTT  
AGAGAT  
GCCTCACACCCACTTCCGTCTTGCGTCAGCCTCTTTCCCTAACGTCTTTCTGACCCTG

>NM\_005099-Human-5hchr1\_P036997chr1-157980048157980748hchr1\_00831

ctcccttctgectgecttcttcttccatgagcctcttcttggtaaggctcaggcctctcccttcacccttctct  
agccagaccaccgagggttctcagaggtgggtcacagactctgggctgggaataactgctccctctccccaccccc  
cttctggccatggcatctctactgacacagctcccagcagtaaaggctctcctaacagccccttggccttggctcttt  
ctctgctcaaatgtgatttcatccccactcccagctataggagttaggtttagggcctagggttgggtctggct  
tctgatgctgctttaaatacactgtggcaaaactgcaaaactagggcaggagtggcaagagaggagggtatccatact  
ccttctggtaatccccttcacacactgtggcggactgcgaggctcctgaggctccatccttctcctcccactcc  
tggctcccccttcttccctTCCCTCCTCCTCCTCCTCCTCTCTAGCTTTAATCCAGACCAGACGCTCCCTCCACAACCGC  
CACGCTGAGCTCTGGCCCTGGCCCTAGCTGCTGACTGAATCGTTCCTCCAACCACACAGGGCAGACACGTTGCA  
GCCCAG  
CCCTCTAGCCCTGGTCCCATAGGCCCCAGCCACACTCAGGCCTGGAGAACCCCAAAGTCC

>NM\_139247-Human-6DBTSS:NM\_139247chr14-2387391723874617hchr14\_00519  
ttccctttgattcccagttgctgttcgggagtggaaagctatggctcctaagctatacacaggcgaaccctcccac  
ggagcatgaacagttcaaaccggtggttagtggttccagccaagcggagaggtcaagagaatgagcggccccactctg  
acntagatccccaccaggacccacattctcctacattctcggcaggctcagccccgcctcggctccccactac  
caaacttcaactccatttggacacatccattgggtccaccccagcccaccttcgcatctctcccagggtccacatt  
gcccttccctgaaggggctgaagcggggagcgcgatggtgtaggagagacaaaaccaagtgcgggaggagaccaggggag  
tccggcttggcacaggaaggggcccggctgtcccgtcggggaagtgggagggggccgcggcggggagggaagcgcct  
gtcggccgggactctgagccAGAGCGCAGCGGCGAGCGTGACTCCGCCATCAGGTCCCCGGCTCCCTCCCCGGACCTAG  
C  
CCACTCCGCTGCGCCAGCGCCGCGGGCAGTGAGTTCGGGGATCAGGGGAACCCGGGGCTCCCTCGCACCAACCC  
CAAATC  
CTGCCCTCCTGGCGATGAGGCTTTTCTAGGGCACCTCTACAATCCGGGTTTGAGGGAGGA

>NM\_139247-Human-7hchr14\_P017399chr14-2387266423873364hchr14\_00519  
tgctcaggagaaagctgagctcctggatgcttctctgttcttccgggttctgacagacttataaacatccgtggtcta  
cgggttctacaataaatccatcaccggatttccagtttccaaaggggaaattctaggaggcccctggggaattcattt  
cctgcttctctcctcttaggggatgtagagcagttgaccacagactcccagaaggaccctccaccgggctctca  
ctgagtccaaagtaaacccatgtccagtttctgttggggaagaaaggtcttcaatcaattctagaaatggcctgc  
ccctggttcttcttactgcttggaggcaaggtgggaaaatcaccgggcccggcaatccttctggtccacgcctaaa  
tccgggaagaggtggggacaaaatgctgggacggctgtcagcttctgcttggagttagggcaggtggcgagatcgcagc  
cctggtggccaggaggtgcGGGACGCCGCGGTCTGGCGCCCCCTGCTGCTCGAGCGCTGCCTCGCGCCGCCCTTCA  
A  
GCTGCCGGCCGCGGTCCCCGGCTCCGGGAATCTCCCGAGCAAATTGGCCAGATTTGGAGACATTATTCCGAAG  
TGCCTC  
CTTGTGAGCTTGATCTATCTTCACTTGCTTCATGACGCTTTGGTTCCCGTTTGACAGA

>NM\_139247-Human-8hchr14\_P017403chr14-2387151223872212hchr14\_00519  
caatttcaaatggttcaacctaaagtgaatggcaagcggaggtgccttgcctcttctgacttaggcttgagacacct  
ttcagaactgggtgaggggctgggctgctggcttcttcttctcaggttcttcttctcctgtcacaatcttgcctc  
acacaccctgcccacaggagctgacctcagaccgagcttctgaccactgtgctgtgcgctgggctgcttctgct  
gctgctgggctccttcccgggagcagcagctgcagcgtggacgcgtcccctgtccggcttggatgggtcgcgctgc  
tagccttagccacgcttctgttaccggggcgtggtgagcgcctgggaccaggtgagagggggcggcaggcggggca  
gcggggacggcccgggcttcatcctcaccaggccttgaatagcccacttggccttccgcttcccgcgccccgcccc  
caggtgtcctatttcttcttCGTCATCTTACGGCGTATGCCATGCTGCCCTTGGGCATGCGGGACGCCCGCTCGCGGG  
CCTCGCCTCCTCACTCTCGCATCTGCTGGTCTCGGGCTGTATCTTGGGCCACAGCCGGACTCACGGCCTGCAC  
TGCTGC  
CGCAGGTGAGCACGCAAGTAGCACAGGCTGCGCTCAGGACGGCTCTGCCACGTGCTAGTA

>NM\_139247-Human-9hchr14\_P017408chr14-2386243123863131hchr14\_00519  
tttccatggccattaccagctggtgaggacagagggggcctatccaccccatgaggcatgttgacctgcccaggg  
actgaaagggaaaccctgatttgggcaggcagctggactaagcccaggggatgctggaatgttgtaaaatagaaaga

aaaaaattacagtctccagcaatctaccatctgggcataatagttgtgataaaccttcggtgaatgccttcttatctt  
ttttctgtgtaggcagttacttattacttagatcacttggctgattcttcaggatttagactcattctagaattctatt  
cctggtgggacactgggaatcaccaccagccaagttacagaagaagaaactaagccccagagaggtaagtggctggca  
agagctcacacagtggctcagagtgaggagtagtcttgacccccctcacataactctccccgagtgaggacccccagt  
gctgaggttcccttccaacCAGAAATAGCAGGATCCACCCCTTTGGACGAGTCTTCCCCTGACTCATCCCTGGGTCAG  
C  
TGAAACCCAGCACAAAGCCACCCTGTGCCAAGAAGCTACCTGCCTCTTCAACTCCTCATCTCCTCTGCAGTTC  
TTCTTC  
CCAACATCATCAGACTGCCCTTTCCAAGCTCCCAATGTGTCCTCCATGATTTCCAACCTC

>NM\_139247-Human-10hchr14\_P017410chr14-2385831523859015hchr14\_00519  
ggggaggaggccccacgcagacctctagaaggagaggaacatgacacaccccctcactccagtctcctgttccccca  
ggatctctaccaccagtcctatgaatgcgtttgtgtcctcttcgcctcagctccagactcaaggagtctactctgaat  
ccaacatcaatcatgagggcctagagtgctgaggctgctcaatgagataattgctgatttgatgaggtgaaaattcca  
agagtctccagaccctatgtctagattctagaattttccaccagtacctcctccactttgcttttctggccatgaag  
tcaatctcccctccagtaactcctcactcctctgatccccagatctaccaactccagcaaacactgcccaccacca  
accctcctctctgacactatctcactcccacagctgatccttaactccaaaggctggggctgggctctggggag  
aggtgatggagagagtaagaGAGACTGGGGACAGGACTCTTCTCTATATACAGCTGCTCTCCAAGCCCAAGTTCAGTG  
GG  
GTGGAGAAGATCAAGACCATCGGCAGCACCTACATGGCAGCCACAGGCTTAAATGCCACCTCTGGACAGGATG  
CACAAACA  
GGTACGGCAACCCTTCCTTACCTACCATCCTCCTCTGGGCTCTCATTGATGGGCTTATTA

>NM\_001627-Human-11DBTSS:NM\_001627chr3+106568136106568836hchr3\_00331  
ccagggtctcctcggcgcgcggtcctgtgcttcttattggcggacctggccctggggggaggccgcggtga  
agcaccgctcatcgggtccaggaccggggcagcggttctcctgatcccggagctgggctcagggtcggactcagt  
cctgcagcgctctaggctcggatccgcttcaaccactgcttgcgctgcgtccggggaagtggggaggagacggg  
aggaggaggaggcggggagaggaggaagaggcagcttacacagccttcagctccttactcagagcagccggag  
accgtgcccgctgcccgtgtaccaccgctgccactgaggagaccgccccccccgctcggcctcctgcgagt  
cctcttagcactggcgttcatgacattgccactgccattattattatcattccaatacaaggaaaataaagaaga  
taccagcgaagaaccgctTACACCTTCCGAATTAACAAGTGTCTCCTGGAAACAGAGGGTTCGTTGTCCCCGGAG  
GA  
GCAGCCGAAGGGCCCCGTGGGCTGGTGTGACCGGGAGGGAGGAGGAGTGGGGGCATTGCCGTGGTGGAAAGTT  
GCGTGCG  
GCAGAGAACCGAAGGTGCAGCGCCACAGCCAGGGGACGGTGTGTCTGGGAGAAGACGCT

>NM\_001627-Human-12hchr3\_P006819chr3+106567420106568120hchr3\_00331  
agaagcctgtccatctgctggagtgctggcttccgggaacggaccaagacggacttgctttaaactgaataattg  
aggattttctgtctataacttaaaatcaccgcttaactcaagtaaaaaagtacacgctctctagagggtttgtaga  
cattgggaaaatccgtatgacgaagtaggtagaattccggatttaattccccgggaaaagcaataatcttctgt  
tggtaccggcagctcagctcagtagtcttctttaaaccagtctatgccagccgggtgtaggggagtggtgggggt  
gagcagggggaggagagattcgaagtagcaggaggaatcagtcagtagcaggggttcccctgccaacaagtagcta  
ttcctgttaactccaagaagcaagttccactttgccactcctcctgcctttccttcttcttccctcactcccg  
ctcttgaccgaaggttcgcTCCCCACCGCCACCGCCCTGCCCACTATTCTCTTTACAGGACAGAAGGCTGCAGCAGC  
A  
CGGCGGAGAAAAATCTCTGAGGAATGAGTCAGTGGGATGGGCGTATGGGTGGAGGGAGAGGGCAGTCGATTT  
TTAAACCT  
CAGCGAGGGTGGGTGGGCAGTTGGAAGCCAGAGGCCTTATCACTGGGGCGCTGCAACATC

>NM\_000045-Human-13EP30054chr6+131935560131936260hchr6\_00875  
tgtctcatgattaaccattaccctcatgtgtgaaatctcaactcaggatttagggctggaaggatgtgacagacga  
tcttccaagcccgccttcttacaaggagctctcagagatctggaggagaaaggccttgcctgagttcgtg

agccagaacaataggacttcttctgtagttgtaaactgtcagttgtgaagtcaggtaatgtcatctggctggcttt  
ttaaagggtgtgaagtgagaacatgaataattgtcacttgattagagacttagactcagagttaggttactccatgtat  
gaagtaaccatatagttacttatacatggagtaaccatatagttactccatgtatgaaaaattgcaagactgttgac  
tgtcattcttggtttagtgggtggagccagctgtcctcattagataaaggtgtttattcaaccaagtataaatggaa  
aaaaaagatgcgccctctgtCACTGAGGGTTGACTGACTGGAGAGCTCAAGTGCAGCAAAGAGAAGTGTGAGAGCATG  
AG  
CGCCAAGTCCAGAACCATAGGGATTATTGGAGCTCCTTTCTCAAAGGGACAGGTAAGGAAAAAAGTCTTTCTT  
TGAATTC  
CTGGAATTTAGTTGAAAATTTTGGACTTCAAAAATTTGTAAGGTGTTATTGTCTAGTTAGT

>NM\_004334-Human-14DBTSS:NM\_004334chr4+1538045415381154hchr4\_00311  
ttcaacctgcgcttcttggggctccctccccgtggacagcggtaagattagcctgggcccagtgactggctctg  
tctgggtgatgtccaagctcactcttttaattttattttatttttttttttagacagagtctcactctgt  
cgcccagggtggagtgactgggtgcaatcactgctcgtcgcagcctcgcctccctggggtcaagcctcctcacatctca  
cctgcaggtagctgagactacagatgctgaccaccaggaccagtaagtttgtattttttgtagagaggagttct  
cacctgtatgttactcagtttctcgaactcctatactcaagcgcctcctcctcctcctcctcctcctcctcctcctc  
tacaggcatgagccgcccgcgcccccacgctcagcttgaattgtctggaacgggaaacggcaaacagcgagat  
ccgagcgagagtcccgcctGCATCAGTTTGCAGAACCGCCTTGGTAGAAGGAGAGAAGGGGAGTGGAGGAAGCAGG  
GGA  
CTGGAGGGACCAAAGTCCCCGATGGCGGCCAGGGGTGCGCGGCATCGCGGCTGCTCCAGCTGCTGCTGCAGC  
TTCTGC  
TTCTACTGTTGCTGCTGGCGGGCGGGCGGGCGCGCGCGGTGGCGGGGAGGGCACCA

>NM\_004336-Human-15DBTSS:NM\_004336chr2-111151671111152371hchr2\_01276  
gtctcgacctgcacacggatttttctccgttccatgaacaaacataatgattctggtttacatatttaagcgaag  
gggagaagaaacgcgactctcaggaccaagggtgaggcagggttttctgtctcaagacctccagttaagacattt  
tctctgcaaagccttctcaaatgatggcttaatcgtgtaattatgtaaaccagtcacaacctggatagctaaaacaa  
aaaaaccaatccctacgcccagccaagctgctccccctgcccgtgccatcccaaacccccgcgctcgtcagcc  
aacggccaggtttcgggtcaaccgaaaacacgggaagtgggaggagctactggctcaaggaggagggtgggactgac  
ctccgagcaacggccccggtgattggccaaccttctgccgcccaccaatgggcaggcgcctgaaacgttcggcgagc  
cgactcgggtcgcgagggtATTCGAATCGGCGGGCCTTCTAGTTTGGCGTTTCAGTTTTGGCCGCTGCCGGCCAGCG  
TC  
CTCTGGCCATGGACACCCCGAAAAATGTCCTTCAGTAAGTGTCCGTCTGGTGGGGTGGGGAAGCCCAGGGGGC  
TGGGGCG  
CCTGGGGTTCCGGGCCCGCCCCAGACCTGCCTTCTTTTGGCCCCCTTCGCCCCCTTC

>NM\_001211-Human-16DBTSS:NM\_001211chr15+3824003238240732hchr15\_00075  
tgaggaaaactgatggtcagaaagattatgtagcttgcctaaggttcacatttggatgattttacagaactagaatcc  
agcttttgaattcaagggtggggcaggaaacagctaggtcagtgccctaagaactccggacgggtgagatttggggcag  
acagcaggggtagtcacctacaagagtcacccaagtcaagcactcagagacatctccaacactcaaaacagcaaag  
aagttctggtgcttaagtgttctcgtcggctcagagactcggctcagcgcgactcaagacagcacctgggggta  
ttgttttgcctaagcctgctcacttccagccattgaatcccaaaaactacaattccattatgcaccgagttcg  
cggactaaacaggcataaactacaagccccagaatgccttgggcgagacgcgagagcacggaggagcggaggggcgtggc  
cacgtcgaccgcgaggaccGTTAAATTTGAAACTTGGCGGCTAGGGGTGTGGGCTTGGGTTGAGGTGGCCGGTTTGTAGG  
GAG  
TCGTGTACGTGCCTTGGTCGCTTCTGTAGCTCCGAGGGCAGGTTGCGGAAGAAAGCCCAGGCGGTCTGTGGCC  
CAGAGGA  
AAGGCCTGCAGCAGGACGAGGACCTGAGCCAGGAATGCAGGATGGCGGGTGAAGAAGG

>NM\_001211-Human-17AF441125\_1chr15+3824036338241063hchr15\_00075  
taagcctgctcactccacggcattgaatcccaaaaactacaattccattatgcaccgagttcgcgactaaaca  
ggcataaactacaagccccagaatgccttgggcgagacgcgagagcacggaggagcggaggggcgtggccacgtcagcc

cgcgggaccgttaaatttgaacttggcggctaggggtgtgggcttgaggtggccggtttagggagtcgtgtacgtg  
ccttgctcgttctgttagctccgagggcaggttcggaagaaagcccagggcgtctgtggcccagaggaaaggcctgcag  
caggacgaggacctgagccaggaatgcaggatggcggcgggtaagaaggaaagggggtgctctgaggtaggtacgggagaa  
agctgctgggggctgggctgagagacacggcctggtagtaatagaaggctccgctcgagcagtcgagggggagatc  
ggcaccgtcagaacagaccCACCGGAGCCTCCTTCCTTTTGGAGTAGAATGCCGGAGGTGGAGGTGAAAACGCAGT  
GGA  
CTGAGGGCACGTGCGAATCCTGCCGCATCCAGCTTCAAAGCGAAGAAGGCTGCCGGACCCCAGCGGAACAAAG  
AGTTTGG  
AAGTTGCAATGTTGTCTGTTTGTAACTCAGCTCAGCCACCTGCTAGTTGTTTGACCTTGG

>NM\_001211-Human-18F310192S01\_1chr15+3824017538240875hchr15\_00075  
ggtgagattggggcagacagcagggtagtcaccctacaagagtcacgccaagtgaagcactcagagacatctcccaa  
cactcaaaacagcaaaagaagttctgggtcttaagtgtcctcgtcggctcagagactcggcttcgagccgactcaa  
gacagcacctgggggtattgttttcctaagcctgtgcacttcacggccattgaatcccaaaaactacaattcccat  
tatgcaccgcgagttcgcggactaaacaggcataaactacaagccccagaatgcttgggagagacgcgagagacaggag  
gagcggaggggctggccacgtcgaccgcgggaccgttaaatttgaacttggcggctaggggtgtgggcttgaggtg  
gccggtttagggagtcgtgtacgtgccttggctcctctgtagctccgagggcaggttcggaagaaagcccaggcg  
gtctgtggcccagaggaaagGCCTGCAGCAGGACGAGGACCTGAGCCAGGAATGCAGGATGGCGGCGGTGAAGAAGG  
AAG  
GGGTGCTCTGAGGTAGGTACGGGAGAAAGCTGCTGGGGGCTGGGCCTGAGAGGACACGGCCTGGTAGGTAAT  
AGAAGGC  
TCCGCTCGGAGCAGTCGAGGGGGAGATCGGCACCGTCAGAACAGACCCCACCGGAGCCTC

>NM\_004054-Human-19DBTSS:NM\_004054chr12-81100308110730hchr12\_01075  
gtattacagctttgtgtatagtgatgggtacatattcccactcgattgtgaatctctggagattagaatagcttaa  
ttcatctgattttgacatggcaccgtttttccatatatcaagcatttcagatatgtattttgagattaattaaatgag  
tttattcaggtcattcctcccaaccactcccactccaaccctcacatctcatagagtcttttttttatttctaa  
caaaactataaagtgaaccctatgtacagaggtaccctctcttaaccattctctgtgtcgcagaaaatgtctcag  
gattataaactctacttctgttttctgctttgccttttaagccatttagaatgactcactttgaaactcttctgt  
gaggtcagatagtggtctagagcataagacttaacttattgccgaaacagagagagaacagaagaagagaagctcagc  
aaattttctgccatacttCATGACTTCACTGTGGCTAAGTGTGGGGACCAGACAGGACTCGTGGAGACATCCAGGTGC  
T  
GAAGCCTTACGCTACTGTCTCAGTTTTTTTGGTAAGAAAACCTAGACCTACCTGATGACTTGTGCTTAGCCTGT  
TTTGCTC  
ATTATAGGTAATGAGTTTGTAGTGTCACTATCTTCTATTTCCCTATTCTTCTCTGACTT

>NM\_004591-Human-20DBTSS:NM\_004591chr2+228503562228504262hchr2\_00197  
ctcaggtcttctcatgacagctgaacctcaaccatgtgatggtaaatgtgtagcagagatgctggcatcccactg  
ctcctctccccctcctcctgactggttctggaagcaaataggggtgaacaataggagtctggaatgttctgtgtg  
gggctgacctttgtatcgctgtaactctctatcttcagacacaaaaatgattaagttaaaactggatgaaagtctttc  
tgggtcacagggctgagctgcttttctcttgcatacaagaatttaacaggattctccccttcaacttctgtc  
ccccacctgaccttcgaccttccaatagaggaaaaagcaggaagtttcttgcgggtttttttatgatgacatg  
atggggccagttgatcaatggggaaaacccatgtggcaacacgccttctgtgtacattccaatatttgctataaatg  
ggcatcccaggctgctgtcAGAATATAACAGCACTCCCAAAGAACTGGGTACTCAACACTGAGCAGATCTGTTCTTT  
GA  
GCTAAAAACCATGTGCTGTACCAAGAGTTTGTCTCCTGGCTGCTTTGATGTCAGTGCTGCTACTCCACCTCTGCC  
GCCAAT  
CAGAAGGTAAGTGTGCTCTTTCCGCTAGCACAGAAGAAAGACTATTTTCATTTTCCTTT

>NM\_004591-Human-21AY150053\_1chr2+228503574228504274hchr2\_00197  
ttcatgacagctgaacctcaaccatgtgatggtaaatgtgtagcagagatgctggcatcccactgctcctctcccc  
ctcctccttactggttctggaagcaaataggggtgaacaataggagtctggaatgttctgtgtgggctgaccttt

gtatcgctgtaatcctctatcttccagacacaaaatgattaagttaaaactggatgaaagcttttctgggtcacaggg  
ctgagctgcttttctcttggcaatacaaaatgtaacaggattctccccttctcaactcctgtccccaccctgac  
cttcgcacctcccaatatgaggaaaaagcaggaagtttcttgcgggttttttatgatgacatgatggggccagtt  
gatcaatggggaaaacccatgtggcaacagccttctgtgacattccaatattgctataaatagggccatcccagg  
ctgctgtcagaatataacagCACTCCCAAAGAACTGGGTACTCAACACTGAGCAGATCTGTTCTTTGAGCTAAAAACC  
AT  
GTGCTGTACCAAGAGTTTGCTCCTGGCTGCTTTGATGTCAGTGCTGCTACTCCACCTCTGCGGCGAATCAGAA  
GGTAAGT  
GTCGCTCTTTCCGCTAGCACAGAAGAAAGACTATTTTCATTTTCCTTTTAGCCTTGAGCT

>NM\_031966-Human-22EP74161chr5+6849826568498965hchr5\_00061  
aagaatgtctattaagccttcatgaactatatttctgctaccgtagaatggaaagtgcaacactagatccaa  
aactactttgacacttctgagactgtggccgcctctgtcaccttcaaaggccactaggccttctgagctggcat  
tggcaacgcacactctgcccggctaactttccaggtggcgccgactggcttactgctctccaggtggccgctgca  
gctgcccagagcgcagggcagagggcagaccacgtgagagcctggccaggcctccggcctagcctcactgtggccccg  
cccctctgaacgcttccgcgcatgcccctggaacgcattctctgcgaccggcagcccaatgggaaggagtgagtg  
gccacgaacaggccaataaggaggagcagtgccgggtttaaactgaggctaggctggcttctcggcgtgctcgggc  
ggaacggctgtgttctgCTGGGTGTAGGTCTTGGCTGGTCCGGCCTCCGGTGTCTGCTTCTCCCCGCTGAGCTG  
C  
TGCCTGGTGAAGAGGAAGCCATGGCGCTCCGAGTCACCAGGGTGAGCCGCTTCGGACTGCGAACTAACGCGGC  
CTTCTTA  
GCTGCTGCCTGCTCTCCCTGCCTGCCTGCGGGAGCCTCCCGAGCGGGAGAGGGCCGAG

>NM\_031966-Human-23DBTSS:NM\_031966chr5+6849823568498935hchr5\_00061  
accagagagtggtgcaacgatcaaatgaaagaatgtctattaagccttcatgaactatatttctgctaccgta  
gaaatggaaagtggtcaacactagatccaaaactactttgacacttctgagactgtggccgcctctgtcacctcca  
aaggccactaggccttctgagctggcattggcaacgcacactctgcccggctaactttccaggtggcgccgact  
ggcttactgctctccaggtggccgctgagctgcccagagcgcagggcagagggcagaccctgagagcctggccag  
gccttccggcctagcctcactgtggcccccccctctgaacgcttccgcgcatgcccctggaacgcattctctgca  
ccggcagcccaatgggaaggagtgagtgccacgaacaggccaataaggaggagcagtgccgggtttaaactgagg  
ctaggctggcttctcggcGTGCTGCGGCGGAACGGCTGTTGGTTTCTGCTGGGTGTAGGTCCTTGGCTGGTCCGGCC  
T  
CCGGTGTCTGCTTCTCCCCGCTGAGCTGCTGCCTGGTGAAGAGGAAGCCATGGCGCTCCGAGTCACCAGGGTG  
AGCCGC  
TTCGGACTGCGAACTAACGCGGCCTTCTTAGCTGCTGCCTGCTCTCCCTGCCTGCCTGC

>NM\_031966-Human-24HSU36838\_1chr5+6849828568498985hchr5\_00061  
ttcatgaactatatttctgctaccgtagaatggaaagtgcaacactagatccaaaactactttgacacttctg  
agactgtggccgcctctgtcaccttcaaaggccactaggccttctgagctggcattggcaacgcacactcttgc  
cggctaactttccaggtggcgccgactggcttactgctctccaggtggccgctgagctgcccagagcgcagggc  
cagaggcagaccacgtgagagcctggccaggcctccggcctagcctcactgtggcccccccctctgaacgcttccg  
cgcgcatgcccctggaacgcattctctgcgaccggcagcccaatgggaaggagtgagtgccacgaacaggccaataag  
gaggagcagtgccgggtttaaactgaggctaggctggcttctcggcgtgctgcccgggaacggctgtgttctg  
ctgggtgtagtcttggctGGTCCGGCCTCCGGTGTCTGCTTCTCCCCGCTGAGCTGCTGCCTGGTGAAGAGGAAGC  
C  
ATGGCGCTCCGAGTCACCAGGGTGAGCCGCTTCGGACTGCGAACTAACGCGGCCTTCTTAGCTGCTGCCTGCTC  
TCCCTG  
CCTGCCTGCGGGAGCCTCCCGAGCGGGAGAGGGCCGAGGAGCGATTTGGGGAGGAAGG

>NM\_001803-Human-25EP73135chr1+2632809126328791hchr1\_00963  
ccatctacaaccttccctgaaacataaatctatcccagccttctccttcagctctataacctgccccttcttctt  
aaacaacaaactcattacggaatctgctatgttctggctcttttaaattggtattattacatgtaacccggcagt



tcttttgtaaagggtcagagaggttagatttctggcccagggtctcagagctggctcagtgattaaaccaggattcagcc  
tgcaggatgcatgattccaggccttgggcccactactctcccaccgtgcctctggattgacctctctctatcttgta  
gatctagcctgctccccagccaggccttagaacctagagcctggtattatccaccccagatctgcagaaaggaagc  
acaccctctccaccttgaagcctctctctctcctacctcaccggcctctctgctctctggttcaaaagcagc  
taaaccaaaagaagcctccaGACAGCCCTGAGATCACCTAAAAAGCTGCTACCAAGACAGCCACGAAGATCCTACCAA  
AA  
TGAAGCGCTTCCTCTTCCTCCTACTCACCATCAGCCTCCTGGTTATGGTACAGGTAAGAGCAACGCCTGGCACC  
ACTGCC  
AGGACTCCCCAAAGTTGCTTGGCATGGAGGGAGGGCATAACAGGATGTGAGCTCCCAGAGA

>NM\_001803-Human-26DBTSS:NM\_001803chr1+2632809026328790hchr1\_00963  
cccatctacaaccttcccttgaacataatctatcccagcctctcctcagctcctataccctgccccatcttctt  
taaacaacaaactcatttacggaatatctgctatgttctggctcttttaattggttattattacatgtaatccggcag  
ttcttttgtaaagggtcagagaggttagatttctggcccagggtctcagagctggctcagtgattaaaccaggattcagc  
ctgcaggatgcatgattccaggccttgggcccactactctcccaccgttgcctctggattgacctctctctatcttgta  
cgatctagcctgctccccagccaggccttagaacctagagcctggtattatccaccccagatctgcagaaaggaagc  
cacaccctctccaccttgaagcctctctctcctacctcaccggcctctctgctctctggttcaaaagcag  
ctaaacaaaagaagcctccAGACAGCCCTGAGATCACCTAAAAAGCTGCTACCAAGACAGCCACGAAGATCCTACCA  
AA  
ATGAAGCGCTTCCTCTTCCTCCTACTCACCATCAGCCTCCTGGTTATGGTACAGGTAAGAGCAACGCCTGGCAC  
CACTGC  
CAGGACTCCCCAAAGTTGCTTGGCATGGAGGGAGGGCATAACAGGATGTGAGCTCCCAGAG

>NM\_031942-Human-27hchr2\_P012880chr2+174044378174045078hchr2\_01330  
aagatcatcaagccacaattgttcaatcttagttcaatccccaacagataatcgtaaaggtaactatactatagac  
gtcttcatcaagctgctgcggttttcttactttgaaaaccacaagtaaacagtcgggttctctgtgcttttggaaa  
gaaagatcaggatataactattttattgcttcagataatggtgtggttccagataagaggtgctacatccaggggagg  
tgaactcgattatgaagggtggagttcgtgctggattctatgatttttaaatcttgaaacccacgcagcaatgaaag  
tgtaaacgcatggtgctgacccgcgccacctcagctgctctcttacccccagactccattttctccgcca  
ccacgaaaattcttgaatcagacagtaacccggggcaatagcaaccatttctgcgccactgctcaggaccgcgca  
gctgcacaaggagagtggtCCCCGTAGCCCTAAAGCCCCCTTTCTCAAAGGGGATTTTAGGAGTGCCCAAGGCTAT  
CC  
TTTGAGGTGAGAATATATAGGGGGTCTGTGTTTTTTCCAGGGGGCCACCTAGTCTTGCGCCATGTCTGGCCGT  
TACCACA  
GCTTGCAGGACCTGTGTCCCAACGCGGAAAGACAGCCCGAGCCCCGCCCTCCGGGCC

>NM\_006614-Human-28DBTSS:NM\_006614chr3+212987213687hchr3\_00324  
tagggcaaaaattgtgagatagtagaatctgtaaatttaagcatgcacaatttgacagcggatggtcgtagcatatt  
tgtaaatcaatgaagccccaccacgcccttaaatgaaggaaagcaagaagcaatttttaatacgtacatggacca  
caccctctaagacgcagcaatgggagaaaagcagattggcgacctgtgtgcaacatgaaccgagtgaaccatcggg  
gagggggtgggggcttcttttaaatgtcgcttttgagataaacgagcaggatcctacctctttgaccggagatg  
ttgaaaagcacgaccaaaagttttgcttggctctctgctttccacaagagataaagtctgaagcctgtaactctcct  
gtcccggggagcgtgcaaaggagggaagataagcggcgtgggtgaggggtggcggcgagaaccaggaaggagcag  
aggcgagagccagcctccggCAGGAGGGCGTAGACCCCGGTGCCAGCCAGAACGGCTCCAGCCTTCCCGCGGCCAGAG  
AG  
CCAGCGGCGGGAGGGGACGGGCGGGACCTCCGCGGACAGCCCCGGGTGCGGACCAGCGGGCAGCGGCCGGCGA  
GACCCTC  
CCTGGATCCGCCAGAGCTTACCGGACCCTGCGCGCCCCGTCCCGGCTCCCGGCCGGT

>NM\_001827-Human-29EP74584chr9+8915516489155864hchr9\_00115  
ctactttcaaagtggacctaggctcctggctcagcctgaggggatacaagggatcacgaggagcctaccctgca  
aggtcgacagcttccgctcaaagcctgtggcccacgcttccggcctcgaccactacgtcatcaccaaaccctgata

cctcactccaccttcaggctctcgcctccaacgggtccgtgtcctggaactttccacgttctcgcgacgcgctctgcgg  
cccttaacgtcccgaacttcgcccctctctggccacgcccctgccgtaaggccctgccacccccgtgacgtacatc  
ttccctcgggcaacctcgcaacagatctctgattggctgaccaggaagcgactttcgaggcggcgacgataggc  
tggcagccggcgaacttcgcagaaggtgattggctggcgctgttccaatcggcggcggtgtcggattcaaatccg  
gatcgttgggactcgggtcgTTAGTCTCCGGCGAGTTGTTGCCTGGGCTGGACGTGGTTTTGTCTGCTGCGCCCGCTCT  
T  
CGCGCTCTCGTTTTCATTTTTCTGCAGCGCGCCAGCAGGATGGCCCACAAGCAGATCTACTACTCGGACAAGTACT  
TCGACG  
AACACTACGAGTACCGGTGGGCGCCTTTCTTAGACCCCGAGCCGGCTCCCTCAGCCGGGG

>NM\_001827-Human-30DBTSS:NM\_001827chr9+8915516689155866hchr9\_00115  
actttcaaagtggacctaggtcctggctcgagcctgaggggatacaaggatcacgaggagccatcacctgcaag  
gtcgacagcttccgctcaaagccctgtggccacgcttccggcctcgaccgactacgtcatcaccacccccgtgatacc  
tactccacctcaggctcctcgcctccaacgggtccgtgtcctggaactttccacgttctcgcgacgcgctctgcggcc  
cttaacgtcccgaacttcgcccctctctggccacgcccctgccgtaaggccctgccacccccgtgacgtacatctt  
ccctcgggcaacctcgcaacagatctctgattggctgaccaggaagcgactttcgaggcggcgacgataggctg  
gcagccggcgaacttcgcagaaggtgattggctggcgctgttccaatcggcggcggtgtcggattcaaatccgga  
tcgttgggactcgggtcgttAGTCTCCGGCGAGTTGTTGCCTGGGCTGGACGTGGTTTTGTCTGCTGCGCCCGCTCTTC  
G  
CGCTCTCGTTTTCATTTTTCTGCAGCGCGCCAGCAGGATGGCCCACAAGCAGATCTACTACTCGGACAAGTACTTC  
GACGAA  
CACTACGAGTACCGGTGGGCGCCTTTCTTAGACCCCGAGCCGGCTCCCTCAGCCGGGGCC

>NM\_001285-Human-31DBTSS:NM\_001285chr1+8664613086646830hchr1\_00768  
ggagcatgaagaggtgtgaggtatgtcaagtaaaaaaccaccattgtgtaagaccaccatgagggataactga  
atatatggcttcaaaaatgttactgaataagcagaacagctctgattttcctgggcaggaggggttggggctttggg  
tgggttgggtcatggttggtaaacatttcaagaagtaaaaaacatcagcggccaagctgcttgcacctgtga  
gtgcttcaaggaaccgatgtgggtccccacccttaccagcatctggcagcagctgaaggcagatggaaatatta  
caagtacgaattgagactaagatattgttatcattctctattgaagacaagcaatagtaaaacacatcaggtcag  
ggggttaaagacctgtgataaacacttccgataagttgaaacgtgtctatatttcatatctgtatataataatg  
gtaaagaagacaccttctgAACCCGCATTTTCCAAAGAGAGAAATCACAGGGAGATGTACAGCAATGGGGCCATTTA  
AG  
AGTTCTGTGTTTCATCTTGATTCTTCACCTTCTAGAAGGGGCCCTGAGTAATTCATCATTAGCTGAACAACA  
ATGGCTA  
TGAAGGCATTGTGCTTGCAATCGACCCCAATGTGCCAGAAGATGAAACACTCATTCAACA

>NM\_001285-Human-32AF039401\_2chr1+8664557186646271hchr1\_00768  
aacatttcatgctcatgtaggaagaatcaatcgtgaaaatggcactgcccaggtaatttacagattcaatgc  
catctccatcaagctaccaatgccttcttcacagaattggaaaaactttaaagttcatatggacaagatgaaatt  
aatgcttaccatctgaagaccaaataatgaattatgaacgaagagatattcaagtattcaatacaagaaaatggggg  
gccaatttgaggtccacctgaggttggcaaatgaaagaatatacacagccactgacagcccataattcatgttcta  
gggacatttagtttcagcaaaaataatgaatgatgtaattggaattttattgactggtaggagctatgcaatagagaaa  
gcagaaatctgatgaggaacttgagtagcttggcaagtaagatatacatatttacttctccattataaaaatag  
tcaataatctcatcactTGCTAATGCTTTTGGTACAAATGGATGTGGAATATAATTGAATATTTTCTGTTTAAG  
GG  
GAGCATGAAGAGGTGTTGAGGTTATGTCAAGGTAACAAAACCACCATTGTGGTAAAGACCACCATGAGGGA  
TAACTGAA  
TATATGGCTTACAAAATGTTTACTGAATAAGCAGAACAGTCTGGATTTTCTGGGCAGGA

>NM\_001841-Human-33hchr1\_P050737chr1-2397448123975181hchr1\_00309  
ccaggctgtctgaactcctgggccaaccgctcctcccactcagcctcccaattgctgggattacaggtgtgaatc  
actgcacccggcctcatttgaataagaaagcaggttacctccttgaggatgctggcatgtgcagagagaatacct

ccaaccaatccattaaagcagttattgctgctgaggcagcctggcccggctgctgctaggttaggctctggcaggatcgc  
agggggcgggggtgtaggggcacgggtggcagccccgcgggtgcgagcgcgcccggccgcccgcggccatgaatggtgctg  
cccctggcctgccatcaccgcccgcgctcagcgcggcactccctgctttgcttgcagagccgctcccaggccccg  
gctctacgtccccgcagcgcCGCGGGCCGGTCTAGCCACAGCAACGCCGGCGCCGGTGGCAGGAAGGCCGGG  
C  
AGCGCAGCCTGCACCGCGCCCCCGCGCCCCGCGCAGCCACACTTGGCAACAACCACCCGGAGAGCCCC  
AAATGG  
CGCGGTCCCCACGCTGCGCGAGAGGAACGCGCTCATGTTCAACAACGAGCTCGTGGCCG

>NM\_001841-Human-34hchr1\_P90326chr1-2398492223985622hchr1\_00309  
acttgggtcctgtgtcccctattaccacagtcctaccactccctattgccccacaccaggatccatcaccattat  
gttaatctgctgtaggcatttgcattcaagctctggcctagtgggaagaggcattggaatggcatgtccttttagg  
tgatctactgtaatgttggcattatccccattttacagataaagaaactgcctttggggaagtaagtgaatcaaca  
tttaacgaggctgtattagaaccaagtccttgaactccagggttaggcccattgccccacctggccagagttcgtt  
taagataactcaaccgaggggcaagagcattgtggcaccagggacctggaggggaagtggtaacaggcaggaaggg  
cagacctctcactcactcatctgtgaaagtaaaaaagaaagcagccttggggtggcactcaacaggtgc  
tctgagtggcaccacggccAGGTCTGGGAGAGGACAGAAAACAACCTGGGACTCCTCAGCCCCCGGCAGCTCCCAGT  
GC  
CCAGCCACCCACAACACAACCGTGAGTAGCTTTTTTTGTTGTTTATTTTAGGCTTCTTCCTCATTCCCCAACAC  
CTGTAT  
TCTTTTTTGTGTTGTTGTTGTTTTGAGACGGAGTTTTGCTCTGTTGACCAGGCTAAAG

>NM\_017437-Human-35hchr14\_P005633chr14+9165740091658100hchr14\_00496  
gaggggagggcagcgtcttcctgctcaggccaggcgtgggatccgggcccgtctctcctcagtcgggttagggcg  
tactgggtcacatctcactcagcagctttctgttatgacagcctcagaaaaccttccaaaagctccggcccggaaat  
cccctcctccaccgaagaaaacccattttcctttcccgtcaccttcggaagccccggggaagccagaccacc  
ctccacacatgcacagcaccgagggttgcctagaacctccccgccaccgtcgccgtatcctcgtcgggcgcccc  
cgggctcccaaacaccctgcagcctcagcgcctacagcagccccgagaccaagggcaacagggaaactcaaccgccc  
agtggagctgcgacctcgggacctgccattgccgcgcccgcacggagcagaggggtgacccagcaaatcactact  
tttctcctcagggtgacTCTCTCATTTTTTTTTTTTTTAGCTTCCAAACATTACCAATAATTTCTGAATAAAATT  
T  
CGCTCCAGACAGACGAGGCGTGCAGGCGTGACCGCGTGCCTTCCGACAGCACCGTGCCACCCCGGAGAT  
GGTCTC  
GCCCTGGTTCCTCCTCGTCTCCGCCGCTAGTCTCCAGCTCCAAAATGGCGGCTGCCACTG

>NM\_002089-Human-36hchr4\_P015538chr4-7532973575330435hchr4\_00131  
aaacattaatgaaatttcgagaaccaaactaaagagagaggatagataagacatgctgcagttcttgcctaacttca  
atccaacaactgaaatgtctccagagaagtaactccccggtaaggatgtagcgggtccctacgtgggtctaagg  
atctgaccacagcagcactgactgggttcagaaagcctcctcgcagggcgggtatctcggtatctctgagagcggcgg  
gctctcgtcccgtccagggttcggggcagaaagagaacatcccacagttggcgggagttacgcaagacagtcagacc  
cggacgtcactcgtgagtcccccgacccccctcccccagaggcgggcccattcgccttctccgaactcgggatcgt  
ctggagctccgggaatttccctggcccgggactccgggctttccagcccaacctgcataaaaggggttcgcccgttc  
ggagagccacagagcccgggCCACAGGCAGTCTCTTGGCAGCTCTCCTCCTCGCACAGCCGCTCGAACCCTGCTGA  
GC  
CCCATGGCCCGCGCCACGCTCTCCGCCGCCCCAGCAATCCCCGGCTCCTGCGGGTGGCGCTGCTGCTCCTGCTC  
CTGGT  
GGCCGCCAGCCGGCGCGCAGCAGGTGGGTCCCGCGCCCTGGGGTCCCCGGGCCGGACGC

>NM\_004887-Human-37EP70003chr5-134942379134943079hchr5\_01239  
ttggggcagcagcctgcaggcactcacactggcactgctccaaaccttccaggtctttaggatctgagccctggg  
cctgggtctcccggcgtcgaaaagctggcctcggggccagagagagaaccacagattcagaaaagcagtcctt

cagcagcctctccaccgtctgggctcccaaaaggcagagcgggacgctggaaatgtgtgcgcgctgtggtatgggtgtgc  
aagtgtgcgaaggcggcgtgtgtgtgagcgagagggtagcggatgtgtgtgtgcgtgtgcgcgctggctccgggtgtg  
cgccgctgcgatagcgggtcctttccggggcgggcgacgggcgggctgggaaggctcctcccctcaccattgagaa  
atctcagtgagtcaccgagtggttctgcatattaatgagctcgtcgtcgcgagggcaggagcggatttaaagaggcca  
ggcggggcggaggaggctGTGGAGAGAGCGCGGAGACAAGCGCAGAGCGCAGCGCACGGCCACAGACAGCCCTGGG  
CAT  
CCACCGACGGCGCAGCCGGAGCCAGCAGAGCCGGAAGGCGCGCCCCGGGCAGAGAAAGCCGAGCAGAGCTGGG  
TGGCGTC  
TCCGGGCCGCCGCTCCGACGGGCCAGCGCCCTCCCCATGTCCCTGCTCCCACGCCGCGCC

>NM\_004887-Human-38DBTSS:NM\_004887chr5-134942380134943080hchr5\_01239  
cttgggggtcaggcctgcaggcactcacacttggcactgtccaaaacccttcaggtctttgaggatctgaccctgg  
gcctgggtctcccggcgtcggaaaagctggcctcggggccagagagagaaccacacgattcagaaaagcagtgccct  
tcagcagcctctccaccgtctgggctcccaaaaggcagagcgggacgctggaaatgtgtgcgcgctgtggtatgggtgtg  
caagtgtgcgaaggcggcgtgtgtgtgagcgagagggtagcggatgtgtgtgtgcgtgtgcgcgctggctccgggtgt  
gcgccgctgcgatagcgggtcctttccggggcgggcgacgggcgggctgggaaggctcctcccctcaccattgaga  
aatctcagtgagtcaccgagtggttctgcatattaatgagctcgtcgtcgcgagggcaggagcggatttaaagaggcc  
aggcggggcggaggaggctGTGGAGAGAGCGCGGAGACAAGCGCAGAGCGCAGCGCACGGCCACAGACAGCCCTGG  
GCA  
TCCACCGACGGCGCAGCCGGAGCCAGCAGAGCCGGAAGGCGCGCCCCGGGCAGAGAAAGCCGAGCAGAGCTGG  
GTGGCGT  
CTCCGGGCCGCCGCTCCGACGGGCCAGCGCCCTCCCCATGTCCCTGCTCCCACGCCGCGCC

>NM\_002089-Human-39hchr4\_P015538chr4-7532973575330435hchr4\_00131  
aaacattaatgaaatttcgagaacccaaactaaagagagaggatagataagacatgctgcagttcttgcctaacttca  
atcccaactgaaatgtcttcagagaagtaactcccccggttaaggatgtagcgcggtccctacgtgggtctaagg  
atctgaccacagcagcactgactgggttcacgaagcctcctcgcaggcgggtatctcggtatctctgagagcggcgg  
gctctcgtcccgtccagggttcggggcagaaagagaacatcccacagttggcgggagttacgcaagacagtcagacc  
cggagctcactcgtgagtgccccgacccccctcaccacagaggcggggccatcgcttctccgaactcgggatcgt  
ctggagctccgggaatttccctggccgggactccgggcttccagcccaaccatgcataaaaggggttcgcttctc  
ggagagccacagagccgggCCACAGGCAGCTCCTTGCAGCTCTCCTCCTCGCACAGCCGCTCGAACCGCCTGCTGA  
GC  
CCCATGGCCCCGCGCCACGCTCTCCGCCGCCCCAGCAATCCCCGGCTCCTGCGGGTGGCGCTGCTGCTCCTGCTC  
CTGGT  
GGCCGCCAGCCGGCGCGCAGCAGGTGGGTCCCGGCGCCCTGGGGTCCCCGGGCCGGACGC

>NM\_004951-Human-40DBTSS:NM\_004951chr13-9875746198758161hchr13\_00002  
ctcaccaccagccacagaaactgtttcttctcataagctgtggataagtggaatgtgtaaactactcctgatacc  
aagtttcaggtaaaaagcactgtcaaagttgacactatcttcttaaaacatttaaaaccatactttacatgcaa  
atcaatataaaatcatcagtaacttggtcttttttgggtaaggtttattgctcagctcttcaaagaatttttga  
tacttaaacctttacagaaaaattataaagttccacagatatcaacaattcataaattccaaggggcttttgatagtt  
tttttaactactataaaaaatttacttcccatttaaaacaaaaaaacacaaagtgcacacagtcacagaggctaa  
ctgctcattacatgctcagtcacaggggtgacagagaaaaaaaagtcaccaccataaaaggaggtctgcacagcctctc  
taaaacaacatgccagttAAACTTACTTCAGTTTTGGACAATACTACAGCTACTACACAGAGACCCGAACGAGT  
CA  
CTGATATGTAAGTACAAGATCTTTTGGCTTTTCAACAACTTTTTAAAGAAAACTTTAAAAGCCTAAGTTTT  
AAGGTAA  
AAGGTAAAAAGGAAAACAATCTATTTAAGAACAAGCTACCATCACTTCTAACAAAAATTA

>NM\_018378-Human-41DBTSS:NM\_018378chr16+6575084965751549hchr16\_00097  
tcagctacgagctcccagcgttgaggggagcttcccaggctcccactagcccaccctcaagctggggttcgacgt  
cgcgatcggctggggtgggcaagggggtctcgtcaaggaagattcagaaccagcccttctccccaccctctctcc

tgcagggcctactgcacctcgaagtgtggcagggacgaggagcctgcgggggccaattccgtaccgtccccgcct  
cccacggtgttcaacagctcagtagaccgccaccagctgggtggagcagccgccgtgacatctgcgccgcccc  
cgcttcggagccaagatccacctctctcccggccaccggggagcccaccaccacctgtgactaaacctggccgc  
ctcggcggggcctgggttcccacggccagctccgctctactccgcttccgggtgtgcgaggagcgtggggc  
ggtagcctagcccagaccgCCTGTCGGCCGGCGGTCCCGCCCCGGGGCTCCCGGTGGCTGCTTCCCGTCCGCTGTC  
C  
TCTGCTGCCAGTCCCCTGCCCCGGGCAAAGCCCATCTGGTCCGCCGAGCAGGTAAGACACCAGCGCCCAAGGTT  
AGACGG  
CAGGAAGACCCGACTTTGGGGGTTTGGCATTCTTACGAGCGGGGGGCTCGTAAGAGCTA

>NM\_018378-Human-42hchr16\_P010662chr16+6574596265746662hchr16\_00097  
gggtcccgtggatggacaggggtcagcaatagccgagaaggaaccctaaggccatccaggttctcaaaagctggctg  
caccctggcttaggcccagggccattgggatcggtcaggcccagcaagtctctgcccaggtggtagctggtctcc  
tcgagtgcctccaccagggcgtgcagcgtggcgcggcggccctcggtcgcacgaagcggcagcagctggaaggcctg  
ctgtacagtcctcgcgctcgtactcgtaggccagcagtcacgcggggtcccgcagcggccggcagcctcgtgca  
gtgagcggccacctgcccattgagaccacagagcgcgcaacgtctgttggcttcaggctcagcggccgattc  
actgcagagggagtggggaaacggggtgagggcggggacccccagcggcgggtcccacccatcccaccggcaacgacc  
ctgcccctcccagactccaACCTCCTGGTGACCCCGCCTCTCCACCTGCGCTCACCTACAGGCTGACCCTGGAACAG  
A  
AAAGTCTGGGCAGGTGGCGGCGGCGGCGGCTTCACCTCCGACAGAGAGGGCACCGGGGGCTGCAAGGGGG  
CCGAAGC  
GACCTCCCCGTCGCCACCCCGGGCCCCGAGCCGCACTTCAGATTTTCGACGCGCATCCTC

>NM\_018378-Human-43hchr16\_P010670chr16+6574667965747379hchr16\_00097  
catccggagccggtcgggctaggggaatggaactgcccgtcacgggggacttaaccgagatccccgcctaccctac  
ctgaccctagcccggccgacctgctgggtaggatgcaactcaaacagcgtcctctgcccagcaaaagcgtccagcc  
gctcggcggcggcgcgagctccagttgacgaggcaccgagtgctgggagcgcggccgaggtcctctgagcgcg  
gagcgcagcggccctcgcggtaggcgagggaagcggccacagggtgcccggcagaatcgcagctgcacgatcag  
ctgagggtcgtgcggtggatcttcagatctgcagcagctccgggctcccgcgctctctgaggaggcgggaggtcagg  
cggggggcgggtcccagctcggccgttctcaaacggcgggagggggaagccggtggaagccccgcgtccat  
cccctgacctagggtgagctTACCCAGAGTACCCAGCTGGGAAGCAAATTTGGGATACAAACAGCAATAACCCAGAA  
AG  
AAGACCAGGATCTGTACAGGGAGCACCCCTAAGACAGAGTGGGTGCCACCTAACCCCGCTCTCACGCCCCAA  
ATGAGGG  
TTGGCAAAGAGAGGGACTTCGAAGCACAGAAAAGGGGGCGTGTGCCCTGGGCAAACAAG

>NM\_018378-Human-44hchr16\_P010685chr16+6575405865754758hchr16\_00097  
gccactgaaatctttaaaggataggatgagtgcttccctcttggggcaacagctggtgctgaacagagacgtggg  
agggaggcaggaatgggatggcagctggaacccagctaaggggtgggtagaggcttctccgctggtgcagggactca  
gctgaggcctttctgcagggcttaaccaagtgcgaatgtgagctggaaggcatgctgccacctatctgcccct  
gcctgaccacattcacaacctacggctggaatttgacctcaggaagccgagccggcggccatcgagctgctg  
atggttctggcgggctgcccggggctgcgaggctgcgctggagtgccgagagaaaaaccgctcttcgacgagg  
ccgagcgtcctggaggctgacgctgtatgaggggcggccagcagctacccacctgacctgaggcgttgcct  
tcacactggagcagcgtGTGCTGCAGGCGGCGCAGCTGTCCCGAGCTCCACAGCCTTTTTTCTGGACAACAGTA  
CC  
CTAGTGGGCAGCGTGGGTCCCGGCTCAGTGCTCGAGCTACTGGAGGCTGCCCAGCCTGCGCGCTCTCGGCCT  
GCACCT  
AGCCAGTTTGTGCGACGCCATCCTCGAAGCACTGGCGGCGCCAGACCGAGCGCCTTTTCGC

>NM\_022116-Human-45DBTSS:NM\_022116chr7-5029207550292775hchr7\_00250  
cggggtggcctctgtaacgacgtttaaccgctgacctaagtgatccgctcctctcccggcccgctccctgctgc  
agcacaggatggcggctgcttcccagtgaggcgcaggtgagccacgcttctctcccgggtgggagcaggtgagccat

tgtttgctctccgggtgggcgaggagagccacgctttgctctcccaggtgagccgctcgctgtcccgggtgagggg  
aagtgagccacgctctatgggaatccttgaatcttcaatttccatcgctccttgtatttgggagtacttt  
taaaaatgaagcctatgcacaatgatgtaataagcgtttatagaacaccactggtcggagctagggcctaggtggcggtg  
ccggggccaggtgcccgcgccacgccccgcgcccgaacgcagcgcacgcactcacgcactcacgcacgcacgtac  
ggcgcgagtcaggggcgacAGCAGCGCGCAGGCGCACGTCAGTCCCCGCGCTTTTCGGAGGCTGCCAGCGTCCCACA  
CC  
AGCCGCAGGTAGGATGCGGTGACGGGAGGCGGGGCAGGGGCGCTGCTGACCCCTGTGGAGCATCAGGGTTGGG  
CGGTAGG  
GGAGAGGCGGGCGTGTGCCTCTGGAATGCTGGGGGTCGCGGGGCGGTGACTTCGCGGGAG

>NM\_022116-Human-46hchr7\_P025447chr7-5029259250293292hchr7\_00250  
gagatggctctcatgacttctttagtcaccaggtccagatttcccgaacctccagtcttcttattgtgatctga  
tatcattattactgcagaggcactgagtgatgctcttactgtgtctgaaaatccaattcactaaattaatacaaat  
acggcactcttcttgaacctgtctccagaacaaagtggaaagtaagatgggggtgctttcaagttccagggaggt  
gtccctacacagcagacagctgtccaaaggaatgtagatgttgctgcccgggagatctgagttgcagactcagtcagaa  
caggtgtcctctccctattttatcttaaacatgcatgtcattttgcatgctactctatgcggtctttcagccagggg  
acattgctgagcaccgctcagctgtgtatggagcgcagactgcaggggtgcgaggggaggtgatgtgctaggcctg  
aattcaagagggggcgagcCACAGGCCCCGCGATGCCGGGGTGGCCTCTTGTAAACGACGTTTAACCGCTGACCTAA  
GT  
GGATCCGCTCCTCTCCCGCCGCCCGCTCCCTGCCTGCAGCACAGGATGGCGGCTGGCTTTCCCGAGTGGGCGCA  
GGTGAG  
CCACGCTTGCTCTCCCGGTGGGCGCAGGTGAGCCATTGTTTGTCTCTCCCGGTGGGCGC

>NM\_001558-Human-47hchr11\_P014157chr11+117361716117362416hchr11\_01129  
ttcctgggactttggggcgaggtctgcataaactgcttagttgtggacccccccaacaattaggtaggggactactca  
gtattcatccatcggtgtcctcagacccccagacggggagggcctggggcaacccaagactcacaccggcgtcctggcg  
cctttgcctcaagggcctgcaactacctctcccattcgagcggcggccacatccttaacccaagccggcagc  
ccaggcaaaagcggctcgagcgcctcaccacaccttcgactcagggccgaggtgtgctggccacctgctcccag  
cacatgcacacacgcgcgcgcacacaccaacacacacgtaccacggcggccgggctaccggaccactttgatccg  
aaggcactggagggccaggggaaggaaagggaggggtggccggagccgctagcgcaccagacagcctcgggttggcc  
cagggcgtagcctgtgggaCAGTGGTTCCCCGTCCGCGCCTCGGGGGCGGGGCGTCTGTAGGCCTCGCCCCGCTGAC  
G  
TCAGCCCTGCGGGGCGCTGGCGGAGCGGGCGGCGGAGCTGTCAGTCCCAGCCCAAGGGTAGCTGGAGGCGCGC  
AGGCCGG  
CTCCGCTCCGGCCCCGACGATGCGGCGCGCCAGGATGCTGCCGTGCCTCGTAGTGCTG

>NM\_001558-Human-48hchr11\_P014162chr11+117373804117374504hchr11\_01129  
gagacctaagccatgtacaggacacagccataaaagtccgagagcatttcaagcaggagggagagtgtgtgcaaggc  
cctgaggcagcaggtgctttagtgttctgggacagaaagaacaccagtgtggctagggcagaggggttagtggtctc  
cttgaaccttggcaattaacagagagcagcccctcactgtgagttccacactgtgcccactgccccacgtcagcc  
accatgttcgctgagtcactactcggggaatagaaaaactaatttggtgtcttaccagaattttagaaaatgaagt  
aggcaggagggcatagactgggatacaatagaataagaactgcagaaatcgtggcacagctcataatgatgagtatta  
ttttgaaactggtttcagttatttacatacgggttatatacaagtattatgcaactatttctgattttgagtca  
tagtcaaaaaagtttgaacATGCTTCTAGATGGGTCTAGCCTGCTTTCAGGTTTGAAGAAAGCACTGTGGATGGAGCCA  
CC  
TGAGAGTTTTACCATGCTCAGCAGACCTTGGTTCTGCCTGTTACTCCATCTGGGCCTGAGAATACAAGTTTC  
TTGTGTA  
TCTGGCCTGAGCCAAACTGGGAATTGCATTAGGAGGAAAGCTGGATTTCGAAAACAAAACA

>NM\_000418-Human-49hchr16\_P006346chr16+2723228127232981hchr16\_00852  
gagttgggtaaacatttattgaagaatgtcaaccactctcacttgaagccgggctgtaggaaggggagggaggtcc  
agtcgccagccctccccaccaaacgcaactgccccggcgcaaaagaggccgagggcaggcaggagcaggtcctgg

aggcctggctggcgtgggcttttattccgagaccaaggggatccactgcagagttctccgctgggctgacctcgggct  
acggcgtgggaggaagcgcgaggcaagacacccagcagaggtgctgggctgccccaggagaggacggcggctcggactg  
tccggcggcggcgggacagcagcagggcgcgaggtggcgggaccgggcccggcgcgcccggcggggcggcgca  
tgcaaatctcggggcgggggagcaggaagccggggcgggctgggtctccgcgccagaaagccccgcggg  
cgcgggcccagggaaggccaCCCAGGGTCCCCACTTCCCGCTTGGGCGCCCGACGGCGAATGGAGCAGGGGCGCG  
CA  
GGTAGGATCCGGGGCCCGCGCGGGATCGGGTTGCGAAGGTATCGCCCGGCACGCCGGCTGAGGGCGTTCCG  
GAAGGGC  
TCGGCCCGCGGGGACCACGGGACCACCCGACTCCGAGCGGGGCCGAGCCCGCA

>NM\_000418-Human-50hchr16\_P006361chr16+2726312527263825hchr16\_00852  
ggaaaaaaaaaaaaaactcgtaccctaaattatacaataacaaaaaaaaaaaaaaaaaag  
gaaattgtgtggccttgaagtccaaatattaactatctggcctgttacagaaaagttgcagaccctggcctagcc  
cgtgagatgtgggtggctgtaaggtggaacattggaattatctacgatggccaaactgtgcgatgcagagcttatgt  
tgttctaaattaattagtccaccggttctccttcatgggcttccaggaacaagtaagtcccaggaccaggcggc  
cagctaggcaggtgtgaggagcatccttggctgcatgtgtaagaggctgtggccagcaagagaggcaaccctagtcggct  
gccccagcacaccctggcctcccaagccccagatctgtctcatcctgatcgggaagctggaagagtctgatgc  
ggttcctggagcatgtcccGGACACAGCTGTGGGGCCAGCCAGCCTACAGGTGACCAGCCTAACCCAGCCCCTGTGT  
C  
TGCAGAGCCCACACGTGTATCCCTGAGAACAACGGAGGCGCGGGTGCCTGTGCCACCTGCTCATGGATGACG  
TGGTCAG  
TGCGGATAACTATACACTGGACCTGTGGGCTGGGCAGCAGCTGCTGTGGAAGGGCTCCTT

>NM\_007317-Human-51EP73081chr16+2970907729709777hchr16\_00157  
cagtggccttgggcccagcagcagcagcactgcaactgactgcccagagtcagcccctgggcccagatctacagaacc  
gaccagactgatagcccttggctgggctgactcccacgatccacacaacgacctggctccgcagacgcgcaacc  
accacggaggcaagaaactgcagaaagtaagggaaggagcccagtgccgggcccgcgctgagcagctccccagcgg  
ccaccgtcgaacatccctgcgtaggggtttgatcgcagcgcctccagacatcaacggctgcgcggcccacgcgcg  
cgcatgctcctgaccaggggaaccttttctggggaccggaggcagcgcctggaaggcgggatagtggcgacccacac  
gcagcagctccggcggcgtagtcttgattggtggaacctgggagagggggcggggcaccggggaattcgaatgggag  
aggcgggccaaggaggagTGAATGGCCGCGGGCGGCTCGACGCAGCAGAGGCGACGCGAGATGGCGGCAGCTTC  
AGC  
GGCGCGATCTCAGGTACTTGTAGCCCGCCTGGGCAAGGCGGGTACCGACGTCTGGAGTTTGTAGTGGGAGTTAT  
GTGTCCG  
AGTGTGGTCCAGGCTCTGCGGGTTGTGCGGAGAGGCGGCCATGGCGCAGGGGCGGGGAG

>NM\_007317-Human-52DBTSS:NM\_007317chr16+2970907429709774hchr16\_00157  
ctacagtggccttgggcccagcagcagcagcactgcaactgactgcccagagtcagcccctgggcccagatctacaga  
accgaccagactgatagcccttggctgggctgactcccacgatccacacaacgacctggctccgcagacgcgcca  
accaccacggaggcaagaaactgcagaaagtaagggaaggagcccagtgccgggcccgcgctgagcagctccccag  
cggccaccgtcgaacatccctgcgtaggggtttgatcgcagcgcctccagacatcaacggctgcgcggcccacgc  
gcgcgatcgtcctgaccaggggaaccttttctggggaccggaggcagcgcctggaaggcgggatagtggcgacca  
cacgagcagctccggcggcgtagtcttgattggtggaacctgggagagggggcggggcaccggggaattcgaatgg  
gagaggcgggccaaggaggGAGTGAATGGCCGCGGGCGGCTCGACGCAGCAGAGGCGACGCGAGATGGCGGCAGC  
TTC  
AGCGCGCGCATCTCAGGTACTTGTAGCCCGCCTGGGCAAGGCGGGTACCGACGTCTGGAGTTTGTAGTGGGAGT  
TATGTGT  
CGGAGTGTGGTCCAGGCTCTGCGGGTTGTGCGGAGAGGCGGCCATGGCGCAGGGGCGGGG

>NM\_007317-Human-53hchr16\_P006842chr16+2971693829717638hchr16\_00157  
actgaaaaactccaagcagggatatcagatctatctctgtattcctaacaccaatagagagatgaggatggagtagt  
gttaggtgagcttttaaggtctttgtacaagaagggtatagagacgttctcttaaatccaaggtccagatgagat

agaatcccttaccacccccccccactccacccttacacacacacacacacacacacacacacacgctaatttc  
tttctttctctgcaggtttgatgccttctatggggagaggactactcagcaggacatctatgcaggttcagtcagcc  
catcctaaggcacttgcggaagggcagaatgccagtgcttgcctatggaccacaggagctggtagggagccagaa  
aagaaacagctatgggtcagaagggctggggaacggagaggaaaacctcacagttttctccactctctcccaggaa  
gacgcacacaatgctgggcaGCCCAGAGCAACCTGGGGTGATCCCGCGGGCTCTCATGGACCTCCTGCAGCTCACAAG  
GG  
AGGAGGGTGCCGAGGGCCGGCCATGGGCCCTTTCTGTACCATGTCTTACCTAGAGATCTACCAGGAGAAGGT  
GAGGCC  
CGTGCTGGTTGGGAGAGGAGCAACAAAGGGTCAAAGTAAGACCTGGTTCTAGAACATGAA

>NM\_017923-Human-54DBTSS:NM\_017923chr4-164892100164892800hchr4\_00259  
ttagtgaatgcactcaactttatgctaataatctgatgttcaggcttcttattttcagacttagtatggttatagg  
ttaaagatatgaaaggccaatagtggtgcaagggatatattttattagttcattaatgaaatttaataagcaataat  
tcaggcttttaataattacaagatatttcaaatatctcatggggccttgatgtagcttcaggaagtatctagcaacct  
aatggctggttaggacttctcagactattattatcctgtcacataatagtgcttagtccatgtatcatagatct  
tcaagtattattcattgtttccaaagcaattgagctattccactcaaatgattacagtaaatagaatagaaactgtg  
gaatcatcttctctcgtaaatgaagtaacagcaaatagcgcagcatctcagctgtccaggtcctcaataagtt  
ttacttttcaaaaccaaccTCAAACCTTCTATATTCTCTGTCTGCATTATAAGCAACATGACCAGCAGCCACGTTTG  
T  
TGTAATTTTTTAAATATGTGGAAAAAAGCAAGATATCAACCATGTATTACCTTAACCAAGATGCCAAATTA  
TCTAACTT  
GTTTCTCCAGGCAAGCAGCCCAACAACAGGGACAGCTCCCAGGAGCCAGTCAAGGTTGTC

>NM\_006739-Human-55EP73446chr22+3412018034120880hchr22\_00538  
tgggcaagatggtgagactccgtctttatgaaatatttaagaaaatcacgtacacctgtggtccccgctacaagggagg  
ctgagggcgaagattgcttgagcccaagaggttgaggctacagtaagccgtgatccagccactgcactccatccccggc  
aacacaacgagaccatgcgtcaggaaaaaaaaaaaaaaaccagaaaataaaaaagaaaccacctaaggcgtcctccg  
gccccgccccctcccatctttgctcgcggccctcctcgcggcacttctccagccagaagttcgcgcaaat  
tgttccgcacacaaaatggagcccgaaggaggcaggtcatgcactttgagccaatcatctcggcagacagtcggg  
cggcggggctggagggctcagaacggtccaatcgctggccgaggtccggcgaaccaatgggagcgcagcggtcgcg  
cgtccgaacaccgctcttGTTTTCCCGCAAACCTCGGCGGCTGAGCGTGAGGTTCTTGTCTCCCCTGGTTTGTGAA  
G  
TGCGGAAAACCAGAGGTGAGGCTAGTGGGAGTGGGACTGGGACTGGGAGCCAGCAGGCATCTGGATTTCCGGG  
TGTAGTT  
GGAGTGGGACAGGAGTTTCTCGGAACTGGGGTTGGAGTCCGGGAGCGCGGCCGGGGGTC

>NM\_006739-Human-56DBTSS:NM\_006739chr22+3412017934120879hchr22\_00538  
ctgggcaagatggtgagactccgtctttatgaaatatttaagaaaatcacgtacacctgtggtccccgctacaagggag  
gctgagggcgaagattgcttgagcccaagaggttgaggctacagtaagccgtgatccagccactgcactccatccccgg  
caacacaacgagaccatgcgtcaggaaaaaaaaaaaaaaaccagaaaataaaaaagaaaccacctaaggcgtcctccg  
cgccccgccccctcccatctttgctcgcggccctcctcgcggcacttctccagccagaagttcgcgcaaaa  
ttgttccgcacacaaaatggagcccgaaggaggcaggtcatgcactttgagccaatcatctcggcagacagtcggg  
gcgggcgggctggagggctcagaacggtccaatcgctggccgaggtcggcgaaccaatgggagcgcagcggtcgcg  
gctccgaacaccgctcttGTTTTCCCGCAAACCTCGGCGGCTGAGCGTGAGGTTCTTGTCTCCCCTGGTTTGTGA  
A  
GTGCGGAAAACCAGAGGTGAGGCTAGTGGGAGTGGGACTGGGACTGGGAGCCAGCAGGCATCTGGATTTCCGG  
GTGTAGT  
TGGAGTGGGACAGGAGTTTCTCGGAACTGGGGTTGGAGTCCGGGAGCGCGGCCGGGGGTC

>NM\_006739-Human-57AB003469\_1chr22+3412018134120881hchr22\_00538  
gggcaagatggtgagactccgtctttatgaaatatttaagaaaatcacgtacacctgtggtccccgctacaagggaggc  
tgaggcgaagattgcttgagcccaagaggttgaggctacagtaagccgtgatccagccactgcactccatccccggca



acacaacgagaccatgcgtcaggaaaaaaacccaagaaaataaaaaagaaaccacctaaggcgtcctccg  
cgccccccctcccatctttgctccgccctgctgcgcccacttctcccagccagaagtctcgcgcaaat  
gttccgcacaaaaatggagcccggaggcggaggtcatgcaacttgcagccaatcatcttcgagacagtcggg  
ggcggggtggagggtcagaacgggtccaatcgctggcgcgaggctccggcgaaccaatgggagcgcagcggctg  
gtccgaacaccgctctgtTTTTCCCGCAAACCTCGGCGGCTGAGCGTGGAGGTTCTTGTCTCCCTGGTTTGTGAAG  
T  
GCGGAAAACCAGAGGTGAGGCTAGTGGGAGTGGGACTGGGACTGGGAGCCAGCAGGCATCTGGATTTCCGGGT  
GTAGTTG  
GAGTGGGACAGGAGTTTCTCGGGAACCTGGGGTTGGAGTCCGGGAGCGCGCGGGGGTCC

>NM\_006739-Human-58hchr22\_P003536chr22+3413145234132152hchr22\_00538  
ctctggtgagttggcttggggtcctggccttagccctgctaaaaggctgtgctgcatactctgtaacaggcagctc  
ttactcatgaggtagcccaggatgtcctgtgtgctcatatcattagaacgttcattttatattaagtatccctgg  
aactccacacattggcttagctgtggctcctgggctgagggtgttgcttaagtgcaggattaaggcagaaggactga  
ggcacaatcactgggaattactgaaagccaagtctcacttctgtgacaggaatacaagagaagtgaacgcagggtt  
ccaggcagcagcccctagtgctagttggagaataagaaaactgtgagaccgctgggacatgtgggtaaagtgggtg  
gctgttggggtcagcaggtccaaggaggtgctaaaggaggtctgagaaggaggaggtcgggctgggcttggggaag  
gtttctgggaggaggttaaTCTGAGCTGGGCTTTGAAGAGTGGTGGATGTGGAAGAATTCCAGGCGGGAGGGGATG  
GC  
AGGAGCAGGTGAAAACCCCGCCTGGGCAAGGTACTGAGTGGCTGGAGGGCCGAGTGGGAGTCTAGGGGATG  
AGGGGCCA  
GGTGGTGTAAAGAGGCCTTGAGTGCCGAGATGGGGAGCTCCTGCTTACACCTGAGGGCAGC

>NM\_006739-Human-59hchr22\_P003537chr22+3413227834132978hchr22\_00538  
acaacttaaaaccactgacaggtagtagctcatttccattttagcctgggcttctcccacgttccagacttt  
aataaccaactgctgattgacatgttacttacatctgaaaggcatctgaactttacatggctgaagctaagctcc  
ccttccccacctcagactggctcctcagcttccatcttaccctttagtgctcagacaaaaaccccccaagtc  
acccttggtgctcttctcctccccacatctaatcactcaggaactctggcagctccactttaaactgttcca  
ggatctgaccacttctcatctccccactgctctgagccctgtcagccctcctggatcaccgttgatcctccccagt  
gttctctccacttgcctactcttctgttctgcagcagcagctgagcagctgctgcatgaccaagacactatcac  
tcctcggtgaaaggggagaCCTTCCAGTGGTTTCCAAGGTCTATGCCATCTGGCCCTCTGTTTGGCTCAGAACCCTTC  
T  
CCCCACTTCCCCTCACCTTTGGACCCTGGAACACACCAGGCCATTTCCTGAGGGCTTGAGAGCTGGGATCTCT  
GTTTAC  
TCAGATAGGTTGTGCTGTCTTGGCCCTAAGGGCCCTAAGGGCTCTGCCTTCTGGGAGGTC

>NM\_024629-Human-60DBTSS:NM\_024629chr4-186030184186030884hchr4\_00855  
tgtcatttacaatgaaggtattgggatagcggtaagtaaatgctaagctcagacagtgataaaggcagcaggggc  
tggaagcacaatcctgtaggctggaaagacgactgcccctcagcacaacagctgcaaacacgggtctccaccacc  
tcttactgcccagcactcagggacactagctcctcccttccccaccacaaggggcccgtcccactggctccggg  
cttctggcgcggaaaactggcagtcgggtggcgcgaaagcccggaaaacttggcatgtttggaccgtaggtaac  
tggtgtgaggcatggactccagctcgttgctgtaataaccagaccagtttccctcagctccaggccaggagg  
agccccggggccgctcaggaagctcgtgcacgcgcgctgctcggcccggattggctgttcggagcggcgaggggctg  
gcccggagctcagtcgctcGAGAGCGGAGAGCGGCACCATGGCCCCGCGGGGCGGCGGCGGCCGCGCCTCACAGG  
TC  
TGAGGGGTAAGTACTGCCGACCCTCGGGAGCGGGGCGGAGACCAGCTTGAAGTGGCTTCTCGCCTGCCGT  
GTTTTGC  
GCCTCCCGGCGCTGTTGGTGTCCACTGTGGAGGTCGCCCCAGTGGCCAATCGCCCCGGT

>NM\_024629-Human-61hchr4\_P010876chr4-186047170186047870hchr4\_00855  
aagggaaagagtgactggaagaagttggatgagggggcaggttaccaggccctgccccttagacggaatctcagt  
ttccactggggtcaggaggaagggttgggcaaggagtgacattcctgaattcccctttgggaacagctgctgag

ggataagaggagaggcacagagacaggtggagatagtagtggtgagggcagcttgagccaagtaagtggcagtggt  
ggagaaggaatttattgaaagcagtttgaggtagaaccactgcatgggaggaaccaggagcagagagggctgggta  
tgagcactgggtagatgggtgggctgtgcttactgagcggggaagatgccgagggcatgtgttaggaggaggaat  
caagagcttgactggaagtttcccttgacgttctgtcagaccaccacttgaagatacacaccagtctcggctctg  
actcaggagacagctccagcTGGAGAGAACAGTTCAGAAAGCCATCAGCTAGAGAAGGGATTTAGAGCTGTGGGACC  
TTA  
TCAGGTAACCTGGGGAAGCTGTGTAGAAAAGGAAATGCAGTAGAGGAGGACCCAAGACAGAGTCCTGGGGCCCT  
CTGACAA  
GTGGGTTAAAGAAGGAGCCTGCAAGGGTGATTGAGAATTACCTGCCTTGCAAGAACGAGC

>NM\_138715-Human-62HUMDMSR\_2chr8-1609439516095095hchr8\_00622  
tgagaattaatgtatgttttagaagcatagattactataaaaaaggaaagatcaggctgggcacggtggctcgcgcct  
gtaatcccagcacttgggaggccaaggcgagcggaccatgaggtcaggggatcaagaccatcctgaccaacatggcgaa  
accctgtctactaaaatacaaaaaattagccgggtgtgatggcacacgcctgtagaacctgggaggcagaggtgacg  
tgagcggagatcacaccactgactccaccctgggtgagacagcgagactccatctcaaaaaaaggaaagctcaatct  
gctgtaaattatgtgctgtttcaacaaccctgtttcttttctttcacttctcttttttaaaagcgcctaaat  
ggggtgaagagtgagttatctgacaaatttagattttgcaaacctgtgattgatgagagtgtattgaaacacattaag  
aaagatttcaacgcaggaaTGTGTCATTTCCCTTTCTTCATGTACCAGATGCTGAAATACTATGAGATAAAGATTTTA  
GG  
TTTCAATTGTAAAGAGAGAGAAGTGGATAAATCAGTGCTGCTTTCTTTAGGACGAAAGGTAAAGAAAAAAAA  
AGGCTTAT  
TTTAATGTTTTTCCAGAATTGTTTCTATTGATTGTTATGTGTGTACTCTGTGTGTGTGT

>NM\_138715-Human-63HUMDLRAC\_1chr8-1609441716095117hchr8\_00622  
agtaactgaaagaggatcatgagaattaatgtatgttttagaagcatagattactataaaaaaggaaagatcagg  
ctgggcacggtggctcgcgcctgtaatcccagcacttgggaggccaaggcgagcggaccatgaggtcaggggatcaaga  
ccatcctgaccaacatggcgaaaccctgtctactaaaatacaaaaaattagccgggtgtgatggcacacgcctgtaga  
acctgggaggcagaggtgacgtgagcggagatcacaccactgactccaccctgggtgagacagcgagactccatctca  
aaaaaaaggaaagctcaatctgctgtaaattatgtgctgtttcaacaaccctgtttcttttctttcacttctct  
tttttttaaaagcgcctaaatggggtgaagagtgagttatctgacaaatttagattttgcaaacctgtgattgatgag  
agtgtattgaaacacattaAGAAAGATTTTCAACGCAGGAATGTGTCATTTCCCTTTCTTCATGTACCAGATGCTGAA  
AT  
ACTATGAGATAAAGATTTTAGGTTTCAATTGTAAAGAGAGAGAAGTGGATAAATCAGTGCTGCTTTCTTTAG  
GACGAAAG  
GTAAAGAAAAAAAAAAGGCTTATTTAATGTTTTTTTCCAGAATTGTTTCTATTGATTGTTA

>NM\_022346-Human-64DBTSS:NM\_022346chr4+1748837317489073hchr4\_00758  
gtctcccttctcagaggtggcgggctccggaacgcgctacgaacttctttgtcgcctctctcgaagcggagcct  
cgtgtgggatccccgcccctcgccacaaggaggtgttatctcggcagatctcccgttctcacttggaggatc  
gcttttcttttagcctcagctcagccgacgaccagccaggcctaaccgacgagccttccccctcgggtggcaag  
gccactccgctcagctcccgcgagcacttccggccgagcaaggcccctcccccttagaaacgccacttccctcc  
gtgaaaacggctggacaaggtgaacctagacgatcgcccaaaagcggggtgagaggtgggtggacctcgcctcc  
cgctcttctccaaagcgttacggcagctctcgggatttccccctcgcgggaattttgaacgttcgagcgt  
aaatactcctgggctgtcATAGAAGACTACTCGGAGAGCGCTGCCTCTGGGTTGGCGGGCTGGCAGGCTGTAGCCG  
AG  
CGCGGGCAGGACTCGTCCCGGAGGGTTCCAGAGCCATGGGAGCGGAAAGGAGGCTGCTGTCGATTAAGGAGG  
CCTTTCG  
GCTGGCGCAGCAGCCGACCAAGAACAGGCGAAGCTGGTGGTGGCGCTGAGCCGCACCTA

>NM\_031423-Human-65hchr1\_P021645chr1+160022882160023582hchr1\_00861  
actgtcgcagagaactgcattctctgattcagagccctcacctgaggggatgatagtagtctcactatccctttct  
ccccttaataagctcaaatgagatgatgctataagcatcaaaaaaccggcacataatcaatgttcaacaagta

ttattactctggaattctataaattacctctgtacttctccctgtcacctgaacttagtgaagtttccttacttgg  
tttctcttcaactcggaccgccgaaacgctctaaacgctggcggaagtcacgcagagatgggctagacgctcaacccc  
ggctcttccccgaaaccggtgtctccacttctcagtcgaggttccgactcgacgccagctccgcgagcaatggt  
tccgacctgcgcctgcccttccatgacaactccagctcccactgcctggcgtctcttgagcccaaccggcatccgctg  
cggttggacgtgggcttggcGGAATGGGGCGGGACTTCCAGTAGGAGGCGGCAAGTTTAAAAAGTGATGACGGTTGAC  
GT  
TTGCTGATTTTTGACTTTGCTTGTAGCTGCTCCCCGAACTCGCCGTCTTCTGTGCGGCGCCGGCACTGTAGGT  
GAGCGC  
GAGAGGACGGAGGAAGGAAGCCTGCAGACAGACGCCTTCTCCATCCCAAGGCGCGGGCAG

>NM\_006418-Human-66DBTSS:NM\_006418chr13+5250044852501148hchr13\_00389  
aggaacaggtcaacgacaacttgggcaataggaactgaagaggaagctcagtcgctcctggaggagagccacagtcct  
aaggcaagttccctaactgtctgtgaaaagtagtattcagtaaaatgggggagagcactagaagtgtgtgaggcaaagg  
actgaggggtgcttttctccatggagcctccaaactctgtgtcatccacaaagactactttggtctcatctcttcaag  
gaagtaccaagtgggaaacaaatattgggcttacaagcacatttgagtaatgttggcaggggatactggatcca  
agggcagctcacagagtgggctcactgacaaggtgtgggcatgactcagattcctgggtgtcctgaacctcctggggc  
agttcacagttccctggcactccctcttctacatgtggccatggggaaatcaccactgggcactataagaagcc  
cctgggctctcgcagagccAGCGGCTCCAGCTAAGAGGACAAGATGAGGCCCGGCTCTCATTTCTCCTAGCCCTTCT  
G  
TTCTTCTTGGCCAAGCTGCAGGGGATTTGGGGATGTGGGACCTCCAATTTCCAGCCCCGGCTTCAGCTCTTT  
CCCAGG  
TGTGACTCCAGCTCCAGCTTCAGCTCCAGCTCCAGGTCGGGCTCCAGCTCCAGCCGAG

>NM\_006418-Human-67hchr13\_P002863chr13+5249994152500641hchr13\_00389  
gtgcgagccagcatccccggcccagagctgggtcttaataccgagactaacaccttttcttccaggaagaaggca  
gaggtcacaaggtgtgtgaaatgtgagcagggcaaatggatctggagcccagggctagagctgctgagcaagagaaa  
atgcatcttatttctcagtttatgaagaataagcttgagatctgaatgcctggctgctcacaagaagctcaggggca  
atagaggtcaagtttctggagagagaaactgctcctgggctcctctgactgggtttgaggcagtcctcctggcctgg  
gagagcgggactgggtcatcgggatcccttgtttatttgggtgtttctcctccatatagaagcatacagtggtgag  
tacttgatagggcagagtcctacctgttggccaggaacaaaacgttctgctggtcttctcctcagagtggggtttaga  
caacttctagaaacagtCACTGTAAGGAACAGGTCAACGACAACCTTGGGCAATAGGAACTGAAGAGGGAAGCTCA  
GT  
CGCTCCTGGAGGAGACCACAGTCCCTAAGGCAAGTTCCCTAACTGTCTGTGAAAAGTAGTATTCAGTAAAAT  
GGGGGAG  
AGCACTAGAAGTGCTGTGAGGCAAAGGACTGAGGGTTGCTTTTCTCCATGGAGCCTCCA

>NM\_001034-Human-68DBTSS:NM\_001034chr2+1021296310213663hchr2\_00558  
gccccggcgccggcctgggagggaggtcttccgggagggcggggccgcccggggatcctctcgcgcccggggct  
ccaatcgctgctcctcagcaatcctaaacggttccggggaaccggggcccgccgccaaggccgagaccctc  
aggggctgcccctgtcccgggacctgtggggcctggggcggggcccccgaccagccagcggacgggcccggg  
gggggaaccgggaggtcccgggggctccacgggggttccccgggggtcctccggaaggcggcgggaggtcccgcg  
ctgccttgaatacgcgcccggcccccggccagcctgggtaggggcaaggcagccaatgggaagggtcggaggtat  
ggcacagccaatgggaaggccggggcaccacaaagccaatgggaaggccgggagcgcgcccgggagatttaaaggct  
gctggagtgaggggtcgcccGTGCACCCTGTCCAGCCGTCTGTCTGCTGCTCGCTCTGCTTCGCTGCGCCTCCAC  
T  
ATGCTCTCCCTCCGTGTCCCGCTCGCGCCATCACGGACCCGAGCAGCTGCAGCTCTCGCCGCTGAAGGGCT  
CAGCTT  
GGTCGACAAGGAGAACACGGTGAGCCCGCGGGAGGGCGCTGCGGGCAGGGGAGGGAGGC

>NM\_001034-Human-69AF149206\_1chr2+1021295610213656hchr2\_00558  
gccccctgcccggcgccggcctgggagggaggtcttccgggagggcggggccgcccggggatcctctcgcgccc  
cggggtccaatcgctgctcctcagcaatcctaaacggttccggggaaccggggcccgccgccaaggccgcccga

gaccctcaggggctgcggcctggtccccggggacctgtgggggctgggaggcgccccgaccagccagcggacg  
ggccggggggggaaccgggaggtccccgggggctccaccgggggtgtccccgggggtctccggaaggcgccggcggaggc  
tcccgcgtgcgcttgaatcgcgcgcccgccgagcctgggtaggggcaaggcgagccaatgggaagggtcg  
gaggcatggcacagccaatgggaaggccggggcaccaaagccaatgggaaggccgggagcgcgaggcgaggat  
aaaggctgctggagtggggGTCGCCCGTGCACCCTGTCCCAGCGTCTGTCTGGCTGCTCGCTCTGCTTCGCTGCG  
C  
CTCCACTATGCTCTCCCTCCGTGTCCCCTCGCGCCCATCACGGACCCGCAGCAGCTGCAGCTCTCGCCGCTGA  
AGGGGC  
TCAGCTTGGTTCGACAAGGAGAACACGGTGAGCCCGCGGGGAGGGCGCTGCGGGCAGGGGA

>NM\_001034-Human-70hchr2\_P001072chr2+1021105210211752hchr2\_00558  
ggctgggaatgcagaggagccttccgggggaggggctccccgtgcagaccaatggtggagtagatgcagatgtc  
aaaacgcgcgctcaagtggcttccgaggaatcccgacgcttagggaggcggaggaggtcgcttgagaccagcctgg  
gcaacaagcagagaccctgctgtttacttaataaaaacaaaaaacgagcaccgagggaaaaaggagtgaatccgg  
ggctagcagcagcctgcggcgggctctccgggagtggtgcaccgcccactccccggaggcggaaaccgcccgat  
tgccgctggccctgggcccaccctctccgcagcggggcaaagttgcccagcctgggggagggaggccacgccga  
gatgactcaggttagcgcgggaggggaggtggcgaactcaccggccttaacaacagctacgcatcttcggcgtct  
tctacaatggctatgtaataTACGTGGCCAGGAATAACTATCAATGAAGCCACCTCTGACTACTTCAGTTACAGTGA  
G  
TTTAACAGGAGCAAAAAAGCACGTGGCGCCCTAGGGCAACCGAAACGAGGGTTTTAGACGCTGATTATGGGAA  
ATTGAAA  
TCTGAGTTGAGTATGAGATGACACCAATAAATTATAATTTTTGTTAGATAATAGCTTTATC

>NM\_001034-Human-71hchr2\_P001073chr2+1021242910213129hchr2\_00558  
tctccagctcctggcctcaacaatcctcctgcttggcctcccaagtctgggattacaggcgtgagccaccgcccc  
agccacagtttgaattcttaaggcaagggtgacaatagggtcaggggtctgacaggagacaggatttctgtgaaaaa  
tgcaccaaggccttctcgcatgtcccgtagttgaaggttacaaaggactgcacattttacatgagtcatctcaacg  
aacgctctctcaccgattaacagtcaccggttacagtcctttactcacggggacaccgaatctgtaagaagc  
ctgctcgttctcccagcaaaacagaccacgggctcagcggcctaacttttaggtctagggtcctcgccgaccacc  
cgccaaaatgtcaggcctcggggccttgcacccaccgagggacacggatcgaagggtcgcagcaacgctcccc  
gcaccaggagcgtttccaGGCCTTTGCACCAACCTCGTTGGCTAAGCCCCCTGCCCGCGGGCGGCCCGGCTGGGAGG  
A  
GGTGTTCGGGAGGCGGGCCGCGGCCCGGGATCCTCTCGCGCCCGGGCTCCAATCGCTGCTCCTCACGC  
AATCCT  
AAACGGTTCGGGGCAACCGGGGCCCGCGCGCCAAGGCCCGGAGACCCTCAGGGGC

>NM\_001034-Human-72hchr2\_P001084chr2+1021378910214489hchr2\_00558  
gccccgtggggcagaggggacgggagccttgggcttggcgccaaagccgattgttctcagctgttcacac  
tcccggggctccttccgcttagggcggccctcccgaggctgctcccgccccctcgccatttccgggttcg  
ggcgtgcgctcctgctgcgacccagagtgcgacgggacagccagttttacatcgggcccgtgaaattgcccgc  
aatggaaaggacttggtccagaaaaagttagtttcatatggttcgcccgtacttaaatgtttattttcccccaac  
agaaaactaaagcagctgccccggcgtggaggatgagccgctgctgagagaaaaaccccccgcttgcattctcccc  
atcaggtaccatgatctgagcagatgtataagaaggcagaggcttctttggaccgagggagtaatcgaggacc  
ccagaagaccctgcaggggTGACCGTACGCCTCAGACATAAATGCACTTGGAGGTTCCCGTTGGCAAGGGGGGCTA  
AC  
TGTGGGGCATAGTAAGTGGTGCCAGCATACTTAAAGTTTTGAGTGCTCAGTGAGTCTGTAGGCTTTACTCT  
CTTCCTT  
TTATGCTAAAATTGTGACTTCCGAACCTCAGGTGGACCTCTCCAAGGACATTCAGCACTG

>NM\_001034-Human-73DBTSS:NM\_001034chr2+1021296310213663hchr2\_00558  
gccccggcgccccggcgtgggagggaggtcttccggaggcggggccgcccggggatcctctcgcgcccgggct  
ccaatcgctgctcctcagcaatcctaaacggttccggggaaccggggcccgcgccaaggccgagaccctc

aggggctgcgccctggtcccgcgggacctgtggggcctggggcgggcgccccgaccagccagcggacgggcccggg  
gggggaaaccgggaggtcccggggggcgtccacgggggtgtccccgggggttccggaaggcgccggcggaggtcccgcg  
ctgccttgaatacgcgcgccccgcggccagcctgggtaggggcaaggcgagccaatgggaagggtcggaggcat  
ggcacagccaatgggaaggccggggcacaaagccaatgggaaggccgggagcgcgcggcgaggagatttaaaggct  
gctggagtgagggtcgcccGTGCACCCTGTCCCAGCCGTCTGTCTGGCTGCTCGCTCTGCTTCGCTGCGCCTCCAC  
T  
ATGCTCTCCCTCCGTGTCCCGCTCGCGCCCATCACGGACCCGCAGCAGCTGCAGCTCTCGCCGCTGAAGGGGCT  
CAGCTT  
GGTCGACAAGGAGAACACGGTGAGCCCGCGGGAGGGCGCTGCGGGCAGGGGAGGGAGGC

>NM\_001034-Human-74AF149206\_1chr2+1021295610213656hchr2\_00558  
gcccctgcccggcgccgcccggctgggagggaggtcttccggaggcggggccgcccggggatcctctcgcgcc  
cggggtccaatcgctgctctcacgcaatcctaaacggttcccgggcaaccggggcccgcgcgccaaggcccgca  
gacctcaggggtcgccctggtcccgcgggacctgtggggcctggggcgggcgccccgaccagccagcggacg  
ggcggggggggaaaccgggaggtcccggggggcgtccacgggggttccccgggggttccggaaggcgccggcggaggc  
tcccgcgtgcttgaatacgcgcgccccgcggccagcctgggtaggggcaaggcgagccaatgggaagggtc  
gaggcatggcacagccaatgggaaggccggggcacaaagccaatgggaaggccgggagcgcgcggcgaggagatt  
aaaggctgctggagtggggGTGCCCCGTGCACCCTGTCCCAGCCGTCTGTCTGGCTGCTCGCTCTGCTTCGCTGCG  
C  
CTCCACTATGCTCTCCCTCCGTGTCCCGCTCGCGCCCATCACGGACCCGCAGCAGCTGCAGCTCTCGCCGCTGA  
AGGGGC  
TCAGCTTGGTCGACAAGGAGAACACGGTGAGCCCGCGGGAGGGCGCTGCGGGCAGGGGA

>NM\_001034-Human-75hchr2\_P001072chr2+1021105210211752hchr2\_00558  
ggctgggaatgcagaggagccttccggggggcgggcgggcctcccgtgcagaccaatggtggagtagatcagatgtc  
aaaacgcgcgtcaagtggcttccgccaggaatccgacgcttagggagggcggaggaggtcgttagaccagcctgg  
gcaaacaaagcgagacctctgtcttacttaataaaaacaaaaaacgagcaccgagggaaaaaggagtgaatcccgg  
ggctagcagcagcctgcccggggcgtctcccgggagtggtgcaccgcccactcccggaggcggaaccgccgcat  
tgcccgtggcctggggcgcgccaacctctccgcagcggggcaagttgcccggacctgggggagggggccacgccga  
gatgactcaggttagcgcgggaggggaggtggcgaactcaccgaccttaaacacacgtacgcatcttcggcgtct  
tctacaatggctatgtaatTACGTGCCAGGAATAAATAATCAATGAAGCCACCTCTGACTACTTCAGTTACAGTGA  
G  
TTTAACAGGAGCAAAAAAGCACGTGGCGCCCTAGGGCAACCGAAACGAGGGTTTTAGACGCTGATTATGGGAA  
ATTGAAA  
TCTGAGTTGAGTATGAGATGACACCAATAAATTATAATTTTGTAGATAATAGCTTTATC

>NM\_001034-Human-76hchr2\_P001073chr2+1021242910213129hchr2\_00558  
tctccagctcctgctcaacaatcctcctgcttggcctcccaagtgtgggattacaggcgtgagccaccgcgcc  
agccacagtttgcaattcctaaggcaagggtgacaataggggtcaggggttgacaggagacaggatttctgtgaaaa  
tgcaccaaggccttctgcctatgtcccgtagttgaaggttacaaaggactgcacattttacatgagtcattcaacg  
aacgtctcctcaccgattaacagtcacgcggttacgagtccttttactcaggggacaccgaatctgtaagaagc  
ctggtcgttgtcccagaaaacgagccacgggctcagcggcctaacttttaggctgtagggtcctcgcgaccacc  
cgccaaaatgtcaggcctcggggccttgcacccccaccgagggacacggatcgaagggtcgcagcaacgctcccc  
gcaccagagcgtttccaGGCCTTTGCACCAACCTCGTTGGCTAAGCCCCCTGCCCGGGCGGGCCCGGCTGGGAGG  
A  
GGTGTCTTCGGGAGGCGGGGCCGCGGCCCGGGATCCTCTCGCGCCCGGGGCTCCAATCGCTGCTCCTCACGC  
AATCCT  
AAACGGTTCCCGGGCGAACCGGGGCCCGCGCGCCAAGGCCCGGAGACCTCAGGGGC

>NM\_001034-Human-77hchr2\_P001084chr2+1021378910214489hchr2\_00558  
gcgggctggggcagagggccaggagcggccttgggcgtcttggcgccaaagccgattttcctcagctgtcacac  
tcccggcctccttcccgcctagggcctcccagggtgctcccgcgccccctggccatttcccgttgc

ggcgtgcgctcctctgctgcgacccacggagtgcgacgggacagccacgtttcacatcgggccccgtgaaattgccgcc  
aatggaaggacttggtccagaaaaacgttagtttcatatggttcgcccgtacttaaatgtttatctcccccaac  
agaaaactaaagcagctgccccggcggtggaggatgagccgctgctgagagaaaaaccccccgcttgcctctcccc  
atcaggtaccatgatattcggcagatgtataagaaggcagaggcttctttggaccgaggaggtaatcggaggacc  
ccagaagaccctgcaggggTGACCGTCACGCCTCAGACATAAATGCACTTGGAGGTTCCCGTTGGCAAGGGGGGCTA  
AC  
TGTGGGGCATAGTAAGTGGTGCCAGCATACTTAAAGTTTGGAGTGCTCAGTGTGAGTCCTGTAGGCTTTACTCT  
CTTCCTT  
TTATGCTAAAATTGTGACTTCCGAACCTCAGGTGGACCTCTCCAAGGACATTCAGCACTG

>NM\_015170-Human-78hchr8\_P005648chr8+7056713670567836hchr8\_00545  
gtcgcagggcacagggactcctggccaaccatccttaggaaaacaagagaccaggaataaagagaaccagcagaagca  
cctggtctgagtctaagaaacatcagtgttactaagcacttggtctctggaacgcttccaaataccacatctt  
ccatccactccatctgcccagggcagctactgtgtcgggtgctcagggagccggaaccaatgcctggaaacctgag  
cccctgcccggccgctcaagccggcggctgcagcgcagttgttccgaggttgcacacatattcagttgcc  
ttttttccccagctcttcagccgtgtcccgaattcaccttagtgaacttctgctctgctcctcctctctg  
gaactgcctttgttctgctggcagcgttggttctatgggggtgtgtgatataataacgcccggctatataaccgtc  
ttcatctgcgagcacttgcCAGACCGTCGCTAATGAATCTTGGGGCCGGTGTCCGGCCGGGGCGGCTTGATCGGCAAC  
T  
AGGAAACCCAGGCGCAGAGGCCAGGAGCGAGGGCAGCGAGGATCAGAGGCCAGGCTTCCCGGCTGCCGGCG  
CTCCTCG  
GAGGTCAGGGCAGATGAGGAACATGACTCTCCCCCTTCGGAGGAGGAAGGAAGTCCCGCT

>NM\_014391-Human-79EP73306chr10-9267062792671327hchr10\_00636  
gtgccttagggcccagatccctcccctcaggctgtttaccagggaaataggatgtcctgggacaagttcccctaagt  
gaagtgtgataagtctgcttatcagaaagatattactgggggtgtgatagtagggcatctacatttctgatagga  
gtcatatgaaagctgacaagaaaaaagggcagtgatgtggtgcaatgtcaacagacagctgtcccctgactcttgaca  
aataggatgacttgattgctgagcgtatgatcaccacaaaggaatggccctctcacatttctctgattcacat  
tcagcagggtagcttgcctcccctcctcttcagcttcccagacactgagctggaatgaaattcacctgcctctga  
gttgctcctaatgggggtgggagtggttacttcggttcccaggttgaagattatctacccggccccagctatataagc  
tgaccggtgtggaggggcccAGCAGGGCCAACTCCAGGGATTCCCTTCCACGACAGAAAAACATACAAGACTCCTTCAG  
CC  
AACATGATGGTACTGAAAGTAGAGGAACTGGTATGTAAGATGCATTAATTTTATAAAATGAAAACCTGGTTCA  
TCTTGTT  
TTTATTTGAAAATTGAAATGCCCTTTGCTTTCAGGTGTAATGCAAGGAACTCTGAAAAT

>NM\_014391-Human-80DBTSS:NM\_014391chr10-9267062492671324hchr10\_00636  
ccttagggcccagatccctcccctcaggctgtttaccagggaaataggatgtcctgggacaagttcccctaagtga  
gtgtgataagtctgcttatcagaaagatattactgggggtgtgatagtagggcatctacatttctgataggtgct  
atatgaaagctgacaagaaaaaagggcagtgatgtggtgcaatgtcaacagacagctgtcccctgactcttgacaa  
aggatgacttgattgctgagcgtatgatcaccacaaaggaatggccctctcacatttctctgattcacatattca  
gcagggtagcttgcctcccctcctcttcagcttcccagacactgagctggaatgaaattcacctgcctctgagtt  
ggctcctaatgggggtgggagtggttacttcggttcccaggttgaagattatctacccggccccagctatataagctga  
ccggtgtggaggggcccagcAGGGCCAACTCCAGGGATTCCCTTCCACGACAGAAAAACATACAAGACTCCTTCAGCCA  
AC  
ATGATGGTACTGAAAGTAGAGGAACTGGTATGTAAGATGCATTAATTTTATAAAATGAAAACCTGGTTTCATCT  
TGGTTTTT  
ATTTGAAAATTGAAATGCCCTTTGCTTTCAGGTGTAATGCAAGGAACTCTGAAAATGTC

>NM\_014391-Human-81AF131884\_1chr10-9267080692671506hchr10\_00636  
tattatgctgttttagaacacgtaagcatgtcatgtgctaattatggccagtgacatcataaaagaaaagtgactact  
gaatgcttcaatttctataatgatggtaaggtgcatgtcatggggcctatttagccccagacatcactccaagaat

tccaaacagatatagacaagtgcctttagggcccagatcccttcccctcaggctgtttaccagggaaataggatgtcctg  
ggacaagtttcccctaagtgaagtgtgataagtctgcttatcagaaagatattactgggggtgatatgtagggcatc  
tacatcttctgataggtatcatatgaaagctgacaagaaaaaaggcagtgatgtggtgcaatgtcaacagacagc  
tgtcccctgactcttgacaaaataggatgacttgcttgctgagcagtgatcaccaccaaggaatggccctctcacat  
ttcttctgattcacatattCAGCAGGGTTAGCTTGTCTCCCTCCCTCTTCAGCTTCCCAGACACTGAGTCTGGAATG  
AAAATTCACCTGCCTCTGAGTTGGCTCCTAATGGGGGTGGGAGTGTACTTCGGTTCCCAGGTTGGAAGATTA  
TCTCACC  
CGGCCCCAGCTATATAAGCTGACCGGTGTGGAGGGGCCAGCAGGGCCAACCTCCAGGGAT

>NM\_212481-Human-82hchr2\_P007404chr2+9662388096624580hchr2\_00010  
ccgcctcgcctcccaaagcagggattccaggcgtgagccgctcccggcctcacctggccttcttgggctagg  
tggggactgggaaatgcacagggccactttcaaatcaaaagtcagaagcactttgctcgtccacagagctcagtgctc  
tgctgaaagcaaggaggcttttccaaggctctagtttgcctccagggaactgaggcacaaggcagcaatgattactg  
agggtcctgcctcctcctctaggtgaggagcctattccaggggctccagctctgaaagcctagaggcgagggcgcgca  
ctacaattcccagaggtccccggactcaagggcggtccccgccccgccttctccgcgacgaagccgggcttacc  
tgggagcccggagtggggcgagcaggggggggacggggcggaactgcggggaggtggccggcgggccgcccgcgagcca  
gtatctcagagagcggggTCCGGACAGCCGCGCGCTGAGGGTCTCGGGGCGGGCGCCGCGGGACCTCTCCGGGCCA  
TG  
GGTAAGCGGCTCTGCGGCGGGCCCGGACAGGGGCTCGGCGGCCCTGCAGGGAGGTTCAAGGTGCCGGCGCCG  
GGTCCCC  
TCCAGCCCTCGTGGCAGTCGGTGCCTGTGTGGGGCGGAGAGGGGCCGGGGTGGGTTTC

>NM\_002982-Human-83DBTSS:NM\_002982chr17+2960591329606613hchr17\_00562  
gttctgtaggcttctatgatgctactattctgcattgaaatgagcaaatggattaatgattgtcagggagccggcca  
aagcttgagagctcctcctggctgggaggcccccttggaaatgtggcctgaaggaagctggcagcagcctgacatgctt  
tcactagtttctcgtcttcttcttcttctgagtttctgctcagagaaagcagaatccttaaaaataaccctcttag  
ttcacatctgtggtcagcttgggcttaatggcaccatcctccccatttgcctcatttggctcagcagtgatgaaaa  
agtgtctcgtcctgacccccgtcttcccttctacttctgaaatccacaggatgctgcatttgcagcagattaa  
cagcccattatcactcatggaagatccctcctcctgcttactcgcctctctcctctgcccgttcaataagagg  
cagagacagcagcagaggaACCGAGAGGCTGAGACTAACCCAGAAACATCCAATTCTCAAACCTGAAGCTCGCACTC  
TCG  
CCTCCAGCATGAAAGTCTCTGCCGCCCTTCTGTGCCTGCTGCTCATAGCAGCCACCTTCATTCCCCAAGGGCTC  
GCTCAG  
CCAGGTAAGGCCCTCTTCTTCTCCTTGAACCACATTGTCTTCTCTCTGAGTTATCATG

>NM\_002982-Human-84AY357296\_1chr17+2960592129606621hchr17\_00562  
aggcttctatgatgctactattctgcattgaaatgagcaaatggattaatgattgtcagggagccggccaaagctga  
gagctcctcctggctgggaggcccccttggaaatgtggcctgaaggaagctggcagcagcctgacatgcttctatctag  
tttctcgtcttcttcttcttctgagtttctgctcagagaaagcagaatccttaaaaataaccctcttagttcacatc  
tgtggtcagcttgggcttaatggcaccatcctccccatttgcctcatttggctcagcagtgatgaaaaagtgtctc  
gtcctgacccccgtcttcccttctacttctgaaatccacaggatgctgcatttgcagcagatttaacagcccac  
ttatcactcatggaagatccctcctcctgcttactcgcctctctcctctgcccgttcaataagaggcagagaca  
gcagccagaggaaccgagagGCTGAGACTAACCCAGAAACATCCAATTCTCAAACCTGAAGCTCGCACTCTCGCCTCC  
AGC  
ATGAAAGTCTCTGCCGCCCTTCTGTGCCTGCTGCTCATAGCAGCCACCTTCATTCCCCAAGGGCTCGCTCAGCC  
AGGTAA  
GGCCCCCTCTTCTTCTCCTTGAACCACATTGTCTTCTCTCTGAGTTATCATGGACCATCC

>NM\_002982-Human-85hchr17\_P005896chr17+2960503829605738hchr17\_00562  
atagacattgcctcagtgacctttatgaaagaagtcactagcttctgtatgccattgggcaaggccaccgcaaggctc  
agaaggaggaggcagtggttaggagaatcgagagatcagaattttaaactcagcccagccattaacatgctcaagtac  
tcctatcatattgtaagagacaacagttcactgaaatgaattctaaggcttgggttttatcagtgcttctgtag

tttctgaggaaatctaaggcacaactgaggaatgaagtcaggctttccaattcccgaataactcctccactgcttactca  
tgtcccttggaataaagaaggaagccaggagaatagctgccataaccaggatgaacttctgtccactgctgctgct  
atgctagcaacagcctcctaactcataatgacttagccatgaggaatgtttctagattctccttagctgtgcccatt  
tggaagatgctgaggacagaGAGAGGACCCAAGCAGGCAACTAGTTGGAGGACTTGTACACGTTTCCTTCCAGCAGT  
ATG  
TCAGAGAGGTGGCAGCCACTGGGGACAGGGCTGCCTGGGTTCTGTGCTCGAGGGGACCTTGAGCAGGCTATT  
TAACCCT  
TCTGTGCCTCAGTTGCCTGATCTATAACATGAAAATTAGCAATCCCTACTAGATAAAAGTT

>NM\_006273-Human-86HSMCP3P\_1chr17+2962083829621538hchr17\_00478  
aggactattattctaagaatattgaatttttttctgctaattgttctatttttacttttctgggttttagaaa  
gccaccaggatttaagacagtgaagaatctttgagtcctttgtagagtgaaccaaagttgaaatgctctttgtggact  
cgtgtcctaggataccctcaaagggaaaaggggaatatcccttacatctttgacttggatccctgattccttc  
cttttctatagaatgtgtctcattcagagaaactggctcttgataatagccatagattacatactgtggcttctc  
tacatagaccctacctaccctcctggcttagctgaaaaacaggctagcctcgactcactgtcatttctcat  
cctccactgaagtgcactggctcagcagatttactccatagatttattactcattctatgattcatcctctctgc  
ttcctataaaaggcagagacAGAGCTTCCAGAGGAGCAGAGGGGCTGAGACCAAACCAGAAACCTCCAATTCTCATGT  
GG  
AAGCCCATGCCCTCACCTCCAACATGAAAGCCTCTGCAGCACTTCTGTGTCTGCTGCTCACAGCAGCTGCTTT  
CAGCCC  
CCAGGGGCTTGCTCAGCCAGGTAAGGTCCCTCTCTCCTTCTCCTTGAAGCACATTGCCCC

>NM\_000647-Human-87hchr3\_P90024chr3+4637014346370843hchr3\_01164  
tttctaaccagattctgaatccatgataaccactgaaaccagcacacatgatcgagtaaaacctcattatacttctcca  
ctatcaccaataccctttattctctggaacatgaaacattctgtgtgctcatatcatgcaaattatcactagtaggaga  
gcagagagtggaaatgttccaggtataagaccacaagataaagaagctcagagtcgtagaaacaggagcagatgtac  
agggtttgctgactcacactcaaggtgcataagcaagatttcaaaatatacctattctggagacctcaaccaatgt  
acaatgttctgactggaaaagaagaactatatttttctgatttttttcaaactttaccattagttgccctgtatc  
tccgcttctcttctgcaggaaactttatttctacttctgcatgccaagtttctacctatagatctgtttggtcagt  
tgctgagaagcctgacatacCAGGACTGCCTGAGACAAGCCACAAGCTGGTGAGTTGTAGGCATTTTTTCCATTACTT  
TC  
TGATTCATAGGCTCAACGCACCTCAAAGCTGGAAATGCCGGGTCTGGGTACACCCTGGGGAACCTGCAAAGCCT  
GCACACT  
TGGGGGAATGATCAAGATGAGAGGCAGGGGTGGGGATGGCATGTGCACCAGGAGATGTT

>NM\_002089-Human-88hchr4\_P015538chr4-7532973575330435hchr4\_00131  
aaacattaatgaaatttcgagaaccaaactaaagagagaggatagataagacatgtgcagttcttgcctaactttca  
atccaacaactgaaatgtctccagagaagtaactcccccggttaaggatgtagcgcggtccctacgtgggtctaagg  
atctgaccacgacgactgactgggttcagagcgcctcctcgagcggttatctcggtatctctgagagcggcgg  
gctctcgctcccgtccagggttcggggcagaaagagaacatcccacagttggcgggagttacgcaagacagtcagacc  
cggacgtcactcgtgagtccccgacccccctcccccagagggggccatcgcttcttccgaactcgggatcgat  
ctggagctccgggaatttccctggccgggactccgggcttccagcccacatgcataaaaggggttcgccgttctc  
ggagagccacagagcccgggCCACAGGCAGCTCCTTGCCAGCTCTCCTCCTCGCACAGCCGCTCGAACCCTGCTGA  
GC  
CCCATGGCCCGCGCCACGCTCTCCGCCGCCCCAGCAATCCCCGGCTCCTGCGGGTGGCGCTGCTGCTCCTGCTC  
CTGGT  
GGCCGCCAGCCGGCGCGCAGCAGGTGGGTCCCGGCGCCCTGGGGTCCCCGGGCCGGACGC

>NM\_020370-Human-89DBTSS:NM\_020370chr12-5304433553045035hchr12\_00552  
cctcattccccacttttctcatctgacttggtttctcaaatgtgctagggtgtcacatgggtcctctgacttgaacca  
tgtctaagccgtggagacaagaaaggtagctcctctgaaacaaaccaaggcttctgggggtacctaaagttgctcct  
ggaactggcttatcttttggcccttgaggagtggccaaatgttctgatgctgactcctgctccttagcaattctt



ggcaatgatcttacagatgagttctccatgcaaagaggggaagaaaacagagttgggttcaggaaggagaaggaag  
agtgaaccactctgaggttaagtagcgggggactttcaacagagaagcctagattcactagccgaagcaaatgagtag  
gaccggaggtggtgaaggaagtggctgggattgggtaatgggggagtttcttattcttcagtgactataataggatac  
ataagagcaggatgtctctGCTTGAAGCTAACTGTCCACCAGAAAGGACTGCTCTTTGGGTGAGTTGAACTTCTTC  
CA  
TTATAGAAAGAATTGAAGGCTGAGAACTCAGGTAAGCACTTTTGTGTGGGTATACTTTTACCTTCTTGGTC  
TCCTCAT  
CTCCCAGGTGGTAACAAACAGAAATGACTAAAGCCTATATGTGTGTGTAGTGGAAGGAG

>NM\_020370-Human-90hchr12\_P020122chr12-5304890053049600hchr12\_00552  
aggggtaccgagggggcaaggggtgtccagtccaagccccccctcgcctccgcaaaactgtgagcaaaaagca  
atagaagcctcgccccgccttccccttcgaggattcggcagctgtgtagcctccccgatccaagttcctagacctca  
tggtgtcccccccaccagtcacctccactgcacaactcgggcgggggtgtgacacctccccccccgactccgt  
ggttccgtatcgtaacccttcagccgaccgggaggggtctggcctacactggtcttcccctcccatcaactct  
ttctgcttgacaatgtagcaaccaggccccccaccacggctctccccttttctctccctgacaataaagtctaat  
ttgtctgcccccgcccttagactcagactctgtcttggccgctgtttgggagcaattctgtcgttaaagtctatctg  
tatggaccggcacagaaagAGGAAAGGGAGCGAGAAGGAGGAGGGAAACGAAATCGGGGGTGGGGGAGGCAAAA  
TATG  
AGGCTTGTGCAGAGTGAGCAGAGGCTCCCCATCCCACCCACGCCACTCTCGTCCAGCTCGTGAAACTTGGCC  
TGGGGG  
ATCATTTCTAGTCCAAGTCTGGGACTGCAGCTGCAGCTGTTGAGAATTTGCCACAACCTCC

>NM\_000600-Human-91EP17080chr7+2253944522540145hchr7\_01045  
gcacgaaattgaggatggccaggcagttctacaacagccgctcacaggagagccagaacagagaactcagatgac  
tggtagattaccttctcataatcccaggcttggggggtgctgtagtgagtcagaggaaactcagttcagaacatctttg  
gtttttacaaatacaaatgaacgtaaatcttagcctgtaaatctggtcactgaaaaaaaaatTTTTTTTTT  
aaaaacatagcttagcttattttttctcttggtaaaactcgtgcatgacttcagcttactctttgtcaagacat  
gccaaagtgtgtagtcactaataaaagaaaaaagaaagtaaaggaagagtggttctgcttcttagcctagcctcaatg  
acgacctaagctgactttccccctagttgtgcttggcatgtaaaaggacgtcacattgcacaatcttaataaggttt  
ccaatcagccccaccgctcTGCCCCACCCTCACCTCCAACAAAGATTTATCAAATGTGGGATTTTCCCATGAGTCT  
C  
AATATTAGAGTCTCAACCCCAATAAATATAGGACTGGAGATGTCTGAGGCTCATTCTGCCCTCGAGCCCACC  
GGGAACG  
AAAGAGAAGCTCTATCTCCCCTCCAGGAGCCCAGCTATGAACTCCTTCTCCACAAGTAAG

>NM\_000600-Human-92DBTSS:NM\_000600chr7+2253955822540258hchr7\_01045  
ggggggctgcatggagtcagaggaaactcagttcagaacatcttggttttacaaatacaaatgaacgctaa  
attctagcctgtaaatctggtcactgaaaaaaaaatTTTTTTTTTcaaaaaacatagcttagcttattttttctct  
ttgtaaaactcgtgcatgacttcagcttactctttgtcaagacatgccaaagtctgagtcactaataaaagaaaaa  
agaaagtaaaggaagagtggttctgcttcttagcctagcctcaatgacgacctaaagctgactttccccctagttgtg  
tcttgccatgctaaaggacgtcacattgcacaatcttaataaggtttcaatcagccccaccgctctggccccaccctc  
accctcaacaaagattatcaaatgtgggattttccatgagttcaatattagagttcaaccccccaataaataag  
actggagatgtctgaggtcATTCTGCCCTCGAGCCCACGGGAACGAAAGAGAAGCTCTATCTCCCCTCCAGGAGCCC  
A  
GCTATGAACTCCTTCTCCACAAGTAAGTGCAGGAAATCCTTAGCCCTGGAAGTCCAGCGGGCGGTGAGCCCT  
GTGTGAG  
GGAGGGGTGTGTGGCCAGGGAGGGCTGGCGGGCGGCCAGCAGCAGAGGCAGGCTCCCAG

>NM\_000600-Human-93AF048692\_2chr7+2253955622540256hchr7\_01045  
ttgggggctgcatggagtcagaggaaactcagttcagaacatcttggttttacaaatacaaatgaacgct  
aaattctagcctgtaaatctggtcactgaaaaaaaaatTTTTTTTTTcaaaaaacatagcttagcttattttttct  
cttgtaaaactcgtgcatgacttcagcttactctttgtcaagacatgccaaagtctgagtcactaataaaagaaaa

aaagaaagtaaaggaagagtgggtctgcttcttagcgctagcctcaatgacgacctaagctgcactttccccctagttg  
tgtcttgccatgctaaaggacgtcacattgcacaatcttaataaggtttccaatcagccccaccgctctggccccacc  
tcacctccaacaaagatttatcaaatgtgggattttcccatgagctcaatattagagctcaacccccaaataata  
ggactggagatgtctgaggcTCATTCTGCCCTCGAGCCCACCGGGAACGAAAGAGAAGCTCTATCTCCCCTCCAGGAG  
CC  
CAGCTATGAACTCCTTCTCCACAAGTAAGTGCAGGAAATCCTTAGCCCTGGAAGTCCAGCGGGCGGTCTGAGCC  
CTGTGTG  
AGGGAGGGGTGTGTGGCCAGGGAGGGCTGGCGGGCGGCCAGCAGCAGAGGCAGGCTCCC

>NM\_000600-Human-94AY170325\_1chr7+2253955722540257hchr7\_01045  
tgggggctgcatggagtcagaggaactcagtcagaacatcttggttttacaatacaaatgaactggaacgcta  
aattctagcctgttaactgtgctactgaaaaaaaaattttttttcaaaaaacatagcttagcttattttttctc  
ttgtaaaacttctgcatgacttcagctttactctttgtcaagacatgccaagtgtgagtcactaataaaagaaaa  
aagaaagtaaaggaagagtgggtctgcttcttagcgctagcctcaatgacgacctaagctgcactttccccctagttg  
gtcttgccatgctaaaggacgtcacattgcacaatcttaataaggtttccaatcagccccaccgctctggccccacc  
caccctcaacaaagatttatcaaatgtgggattttcccatgagctcaatattagagctcaacccccaaataatag  
gactggagatgtctgaggcCATTCTGCCCTCGAGCCCACCGGGAACGAAAGAGAAGCTCTATCTCCCCTCCAGGAGCC  
C  
AGCTATGAACTCCTTCTCCACAAGTAAGTGCAGGAAATCCTTAGCCCTGGAAGTCCAGCGGGCGGTCTGAGCCC  
TGTGTGA  
GGGAGGGGTGTGTGGCCAGGGAGGGCTGGCGGGCGGCCAGCAGCAGAGGCAGGCTCCCA

>NM\_000600-Human-95HS26KDAG\_1chr7+2253953422540234hchr7\_01045  
taccttctcataatcccaggcttgggggctgcatggagtcagaggaactcagtcagaacatcttggttttaca  
aatacaaatgaactggaacgctaattctagcctgttaactgtgctactgaaaaaaaaattttttttcaaaaaacat  
agcttagcttattttttcttctgtaaaacttctgcatgacttcagctttactctttgtcaagacatgccaagt  
ctgagtcactaataaaagaaaaaaagaaagtaaaggaagagtgggtctgcttcttagcgctagcctcaatgacgaccta  
gctgcactttccccctagttgtgcttgcctatgctaaaggacgtcacattgcacaatcttaataaggtttccaatcag  
ccccaccgctctggccccaccctcacctcaacaaagatttatcaaatgtgggattttcccatgagctcaatattaga  
gtctcaacccccaaataaTAGGACTGGAGATGTCTGAGGCTCATTCTGCCCTCGAGCCCACCGGGAACGAAAGAGA  
AG  
CTCTATCTCCCCTCCAGGAGCCCAGCTATGAACTCCTTCTCCACAAGTAAGTGCAGGAAATCCTTAGCCCTGGA  
ACTGCC  
AGCGGGCGGTCTGAGCCCTGTGTGAGGGAGGGGTGTGTGGCCAGGGAGGGCTGGCGGGCGG

>NM\_000600-Human-96HSBSF2\_1chr7+2253942022540120hchr7\_01045  
cacctggagacgctgaagtaactgcacgaaattgaggatggccaggcagttctacaacagccgctcacaggagagc  
cagaacacagaagaactcagatgactggtattaccttctcataatcccaggcttgggggctgcatggagtcaga  
ggaaactcagtcagaacatcttggttttacaatacaaatgaactggaacgctaaattctagcctgttaactggtc  
actgaaaaaaaaattttttttcaaaaaacatagcttagcttattttttcttctgtaaaacttctgcatgact  
tcagctttactctttgtcaagacatgccaagtgtgagtcactaataaaagaaaaaaagaaagtaaaggaagagtgg  
ctgcttcttagcgctagcctcaatgacgacctaagctgcactttccccctagttgtgcttgcctatgctaaaggacgtc  
acattgcacaatcttaataaGGTTTCCAATCAGCCCCACCGCTCTGGCCCCACCCTCACCCCTCAACAAAGATTTATCA  
AATGTGGGATTTTCCATGAGTCTCAATATTAGAGTCTCAACCCCCAATAAATATAGGACTGGAGATGTCTGA  
GGCTCAT  
TCTGCCCTCGAGCCCACCGGGAACGAAAGAGAAGCTCTATCTCCCCTCCAGGAGCCCAGC

>NM\_000600-Human-97HSBSF2\_2chr7+2253951222540212hchr7\_01045  
gaactcagatgactgtagtattaccttctcataatcccaggcttgggggctgcatggagtcagaggaactcagtc  
cagaacatcttggttttacaatacaaatgaactggaacgctaaattctagcctgttaactggtcactgaaaaaaaa  
ttttttttttcaaaaaacatagcttagcttattttttcttctgtaaaacttctgcatgacttcagctttactc  
ttgtcaagacatgccaagtgtgagtcactaataaaagaaaaaaagaaagtaaaggaagagtgggtctgctttagc

gctagcctcaatgacgacctaagctgcacttttccccctagttgtgtcttggccatgctaaaggacgtcacattgcacaat  
cttaataaggtttccaatcagccccaccctctggccccaccctcaccctccaacaaagatttatcaaatgtgggattt  
tccatgagctcaatattaGAGTCTCAACCCCAATAAATATAGGACTGGAGATGTCTGAGGCTCATTCTGCCCTCGA  
G  
CCCACCGGGAACGAAAGAGAAGCTCTATCTCCCCTCCAGGAGCCAGCTATGAACTCCTTCTCCACAAGTAAGT  
GCAGGA  
AATCCTTAGCCCTGGAAGTGCAGCGGGCTCGAGCCCTGTGTGAGGGAGGGGTGTGTGG

>NM\_000600-Human-98HSBSF2\_3chr7+2253953622540236hchr7\_01045  
cctcttcataatcccaggcttgggggctgcatggagtcagaggaaactcagttcagaacatcttggttttacaaa  
tacaataactggaacgctaaattctagcctgttaatctggctactgaaaaaaaaatttttttttcaaaaacatag  
cttagcttattttttctttgtaaaactctgcatgactcagcttactctttgcaagacatgccaaagtct  
gagtcactaataaaaaagaaaaaagaaagtaaaaggagagtggttctgcttctagcctcagctcaatgacgacctaagc  
tgacttttccccctagttgtgtcttggccatgctaaaggacgtcacattgcacaatcttaataaggttccaatcagccc  
caccgctctggccccaccctcaccctccaacaaagatttatcaaatgtgggatttccatgagctcaatattagagt  
ctcaaccccccaataataataGGACTGGAGATGTCTGAGGCTCATTCTGCCCTCGAGCCCACCGGGAACGAAAGAGAAG  
CT  
CTATCTCCCCTCCAGGAGCCAGCTATGAACTCCTTCTCCACAAGTAAGTGCAGGAAATCCTTAGCCCTGGAAC  
TGCCAG  
CGGCGGTCTGAGCCCTGTGTGAGGGAGGGGTGTGTGGCCAGGGAGGGCTGGCGGGCGGCC

>NM\_002232-Human-99hchr1\_P041535chr1-110929548110930248hchr1\_00691  
tgcaagcccatcagcaccattactcccttggcttgcacatctagcagaagctaaattgtttaaacccccgctcctcc  
ccagggttggggctctcgaccctcaagggaacctgggatgccggcgccaggcttgcctctggcccagggcgcccgcct  
ggcctgcactccctcctggacactggggccgctgccctccccgggctgtacctaggggtgtggaggccagggggccgg  
cgcccgggggcccgggagctctccccggcccacggggcgaacacctggcgactgggacgcccagggcgggccgg  
ggcgagggggcgtgaccagaagcggggcggagcctagggggccggcgagcctgactccccgtgggcccggctctgct  
gggtgggcattcccggggcgccgaggtacaacatgagggctcttctgctgacaccgagggccttgagggctgcaaga  
aatgcagggccgggctgcCCCCGAGAGCGGGACGCGCGCCCCGCGGTTGGGCGGGAATCCTAAGGGGACGCGGAGG  
CG  
GGCGCGCCCCGAGGGGAGGGGGCGGAGAGCGGAGAAGGAGGGAGGAGGCGTCCCCGTGCGGGAGCCCCG  
CTGACCG  
CGCCAGACCCAGACAGAGCATCGCGGCTTTGGCTGCAACAGGCGGTGGGCTCGGCTCGGG

>NM\_000963-Human-100DBTSS:NM\_000963chr1-183381012183381712hchr1\_00778  
cctcgaccttaaaagactacagaccagacacggcgggcgggagaggggattcctcgccccggacctcagg  
ggcctcagattcctggagaggaagccaagtgtccttctgccccggatccatccaaggcagctcagaac  
tggctctcgaagcgtcgggcaaaagactgcaagaagaaaagacatctggcgaaacctgtgcctggggcggtggaa  
ctcggggaggagagggaggatcagacagagagtgaggactaccctctgctccaaattggggcagcttctgggtt  
tccgattttctcatttccgtgggtaaaaaaccctgccccaccgggcttacgcaatttttaaggggagaggagggaaa  
aatttggggggtagcaaaaggcgaaagaaacagtcatttctgcatgggcttggtttctcagcttataaaaaggaa  
ggttctctcggttagcgaccAATTGTCATACGACTTGCAGTGAGCGTCAGGAGCACGTCCAGGAACTCCTCAGCAGCGC  
C  
TCCTTCAGCTCCACAGCCAGACGCCCTCAGACAGCAAAGCCTACCCCCGCGCGCCCTGCCCGCGCTGCGA  
TGCTCG  
CCC GCGCCCTGCTGCTGTGCGCGTCTGGCGCTCAGCCATACAGGTGAGTACCTGGCGC

>NM\_000963-Human-101AF044206\_1chr1-183381044183381744hchr1\_00778  
cttactcggcagctgtcccagctgacttctcacccttaaaagactacagaccagacacggcgggcgggcgggg  
agaggggattcctcgccccggacctcagggcctcagattcctggagaggaagccaagtgtccttctgcccc  
cggatccatccaaggcagctcagaactggctctcgaagcgtcgggcaaaagactgcaagaagaaaagacatc  
tggcgaaacctgtgcctggggcggtggaactcggggagagaggggatcagacaggagagtggggactacccc

tctgctcccaaattggggcagcttctgggttccgattttctcatttccgtgggtaaaaaaccctgccccaccgggct  
tacgcaatttttaaggggagaggagggaaaaattgtgggggtacgaaaaggcggaagaaacagtcatttctgac  
atgggcttggtttcagctTATAAAAAGGAAGGTTCTCTCGGTTAGCGACCAATTGTCATACGACTTGCAGTGAGCGT  
C  
AGGAGCACGTCCAGGAACTCCTCAGCAGCGCCTCCTTCAGCTCCACAGCCAGACGCCCTCAGACAGCAAAGCCT  
ACCCCC  
GCGCCGCGCCCTGCCCGCCGCTGCGATGCTCGCCCGCGCCCTGCTGCTGTGCGCGGTCTCT

>NM\_000963-Human-102AF044206\_2chr1-183381019183381719hchr1\_00778  
gtgacttctcgcacctctaagacgtacagaccagacacggcgggcgggagaggggattccctgcgccccggga  
cctcagggcgctcagattctggagaggaagccaagtgtccttctgcctccccgggatccatccaaggcgatcag  
ccagaactggctctcgaagcgctcgggcaaagactgcgaagaagaaagacatctggcgaaacctgtgcctggggc  
ggtggaactcggggagagaggggagggatcagacaggagagtggggactaccctctgctcccaaattggggcagctt  
ctgggttccgattttctcatttccgtgggtaaaaaaccctgccccaccgggcttacgcaatttttaaggggagagg  
agggaaaaattgtgggggtacgaaaaggcggaagaaacagtcatttctgacatgggcttggtttcagcttataa  
aaaggaaggttctcgggtAGCGACCAATTGTCATACGACTTGCAGTGAGCGTCAGGAGCACGTCCAGGAACTCCTCA  
G  
CAGCGCCTCCTTCAGCTCCACAGCCAGACGCCCTCAGACAGCAAAGCCTACCCCCGCGCCGCGCCCTGCCCGCCG  
CTGCC  
ATGCTCGCCCGCGCCCTGCTGCTGTGCGCGGTCTGGCGCTCAGCCATACAGGTGAGTAC

>NM\_000963-Human-103HSU20548\_1chr1-183380941183381641hchr1\_00778  
gacctcagggcgctcagattctggagaggaagccaagtgtccttctgcctccccgggatccatccaaggcgatca  
gtccagaactggctctcgaagcgctcgggcaaagactgcgaagaagaaagacatctggcgaaacctgtgcctggg  
gcggtggaactcggggagagaggggagggatcagacaggagagtggggactaccctctgctcccaaattggggcagct  
tcctgggttccgattttctcatttccgtgggtaaaaaaccctgccccaccgggcttacgcaatttttaaggggaga  
ggagggaaaaattgtgggggtacgaaaaggcggaagaaacagtcatttctgacatgggcttggtttcagcttata  
aaaaaggaaggttctcgtgtagcgaaccaattgtcatacactgtcagtgagcgtcaggagcagctccaggaaactcct  
agcagcgcctcctcagctcCACAGCCAGACGCCCTCAGACAGCAAAGCCTACCCCCGCGCCGCGCCCTGCCCGCCGCTG  
CGATGCTCGCCCGCGCCCTGCTGCTGTGCGCGGTCTGGCGCTCAGCCATACAGGTGAGTACCTGGCGCCGCGC  
ACGGG  
GACTCCGGTTCCACGCACCCGGGCAGAGTTTCCGCTCTGACCTCCTGGGTCTATCCCAGT

>NM\_000963-Human-104HUMPGHS\_1chr1-183381013183381713hchr1\_00778  
tcctcgcacctctaagacgtacagaccagacacggcgggcgggagaggggattccctgcgccccggacctcag  
ggccgctcagattctggagaggaagccaagtgtccttctgcctccccgggatccatccaaggcgatcagtcagaa  
ctggctctcgaagcgctcgggcaaagactgcgaagaagaaagacatctggcgaaacctgtgcctggggcggtgga  
actcggggagagaggggagggatcagacaggagagtggggactaccctctgctcccaaattggggcagcttctgggt  
ttccgattttctcatttccgtgggtaaaaaaccctgccccaccgggcttacgcaatttttaaggggagaggaggaa  
aaattgtgggggtacgaaaaggcggaagaaacagtcatttctgacatgggcttggtttcagcttataaaaaagga  
aggttctcgtgtagcgaCAATTGTCATACGACTTGCAGTGAGCGTCAGGAGCACGTCCAGGAACTCCTCAGCAGCG  
C  
CTCCTTCAGCTCCACAGCCAGACGCCCTCAGACAGCAAAGCCTACCCCCGCGCCGCGCCCTGCCCGCCGCTGCG  
ATGCTC  
GCCCGCGCCCTGCTGCTGTGCGCGGTCTGGCGCTCAGCCATACAGGTGAGTACCTGGCG

>NM\_004165-Human-105DBTSS:NM\_004165chr16-6551674065517440hchr16\_00006  
caccctaaattctagctcagacctgagcctatggggagtgggtgtcatgggagagaaggggatctctgtccagct  
gtaactagcttactgctaaaaggacgagccgggacttggggagaggaagggagaattcagctcacggggccagaccg  
aattctctcagagggcagttgtgctttggctgattgggttaccctgctgctcctccatcacgtactcccc  
cgcaacctgctctctctctctcacacacctcagctccggacctgctaccggtcagccctctattcccag  
acagctaccgctactccctggcggttagggcgggtgtcgggatgtaaggtccgaggaagagggtgggggattccct

ggtgggggtggacagacacgtcagccccgcagcagcgtggaccggggcgaggcggggcggggtggaggcttaaatag  
gcggtcttgagccagagccCAGTGC GGGCTGAGAAGGCGGTGGCTGCAGCAGCAGCGGCGGCGAAACCCTAAAGTC  
CG  
AGTCCGGACTACGAGTGC GTGGCCTCCTAATCCGGATCCTAGTCCTGAGCGTGTCTGTGTGCGAGTGGGTGAG  
TGTCCCTG  
GCGGAGCGGGGTGCGGGCGGCTGCAGATGGATGCGCCAGGTCGGAGGGGTCCCGGGTGA

>NM\_030666-Human-106EP74091chr6-27868922787592hchr6\_00713  
agatttggcccttttgccttccactttccaccattgaggacgcagcagcaagctgtcatcttgaaacagagagcagg  
tgtttggaactggttctgtttcatctgattctgggggcccctcttttccctgtgcaagatcccaaatttgcttcttc  
tctcaaagaagctcccaatatagatgggactcaaaggagtcatttgcctctaagaggtgtcacaatatgtcgtctca  
gtcattcacaccttagtaagaaaaagcttttcaggctcttgcagagattcggggaaaggcttgaactgagaaagaagc  
cgcgcccctgaggagggcgctgcccgaagccacgctcacttctgcttgcacttaggcgacctcgggagctcggactcct  
acgcagtcaccgggaaggcgccgcccgcggctgctggcccgggtgacgcttccgctgtataagagcagcgg  
ccctcgggtgctccttctGACCTCGCACCCAGCTCGGAGCCCGAGCGTGCCTCGGCGGCTGTCCGGTAAGGCCGGG  
CTCGGAGCGGTGGCGCGGGGCGGGCGGGGAGAGGCCAGGTCCTCGCTCAGCTTCCAGCCCGGCACCCCC  
CACCCC  
CCAGGTCAGGCCCCTCAGACCCGAGCTCCCTGCGCTCGCCCTCCCCGCCAGCTTCGG

>NM\_030666-Human-107DBTSS:NM\_030666chr6-27868932787593hchr6\_00713  
gagatttggcccttttgccttccactttccaccattgaggacgcagcagcaagctgtcatcttgaaacagagagcag  
gtgtttggaactggttctgtttcatctgattctgggggcccctcttttccctgtgcaagatcccaaatttgcttcttc  
cttcaaagaagctcccaatatagatgggactcaaaggagtcatttgcctctaagaggtgtcacaatatgtcgtctc  
agtattcacaccttagtaagaaaaagcttttcaggctcttgcagagattcggggaaaggcttgaactgagaaagaag  
ccgcgcccctgaggagggcgctgcccgaagccacgctcacttctgcttgcacttaggcgacctcgggagctcggactc  
tacgcagtaccgggaaggcgccgcccgcggctgctggcccgggtgacgcttccgctgtataagagcagcgg  
gccctcgggtgctccttctGACCTCGCACCCAGCTCGGAGCCCGAGCGTGCCTCGGCGGCTGTCCGGTAAGGCCGGG  
CCTCGGAGCGGTGGCGCGGGGCGGGCGGGGAGAGGCCAGGTCCTCGCTCAGCTTCCAGCCCGGCACCCC  
CCACCC  
CCCAGGTCAGGCCCCTCAGACCCGAGCTCCCTGCGCTCGCCCTCCCCGCCAGCTTCGG

>NM\_030666-Human-108AF053630\_1chr6-27869042787604hchr6\_00713  
agacttcatagatattggcccttttgccttccactttccaccattgaggacgcagcagcaagctgtcatcttgaa  
acagagagcagggtttggaactggttctgtttcatctgattctgggggcccctcttttccctgtgcaagatcccaa  
tttcttcttctcaaagaagctcccaatatagatgggactcaaaggagtcatttgcctctaagaggtgtcaca  
tatgtcgtctcagtcattcacaccttagtaagaaaaagcttttcaggctcttgcagagattcggggaaaggcttgaac  
tgagaaagaagccgcccctgaggagggcgctgcccgaagccacgctcacttctgcttgcacttaggcgacctcggga  
gctcggactctacgcagtcaccgggaaggcgccgcccgcggctgctggcccgggtgacgcttccgctgta  
taagagcagcgccctcggTGCCTCCTTCTGACCTCGCACCCAGCTCGGAGCCCGAGCGTGCCTCGGCGGCTGTCC  
G  
GTAAGGCCGGGCTCGGAGCGGTGGCGCGGGGCGGGCGGGGAGAGGCCAGGTCCTCGCTCAGCTTCCA  
GCCCCG  
ACCCCCACCCCCAGGTCAGGCCCCTCAGACCCGAGCTCCCTGCGCTCGCCCTCCCC

>NM\_000199-Human-109DBTSS:NM\_000199chr17-7580852475809224hchr17\_00106  
caccagccccacgccccggcctccgctccggcaaatccactccccggccccggccccccacaaggcc  
gctggtccggatctggggtctccggagagaccctgcgcaactgacctccggtccttgccccgagcaaggcc  
gaggccgccccgaccgggtagggacgcggcggggagtggtcccaaggaggccccgactcaggactccgct  
ggccccgctcgggtgccccggcagccccggcactgtccgctccccctgcccctggtccccgctcggccctcgcg  
ggccacggactcaccactcggcagtcagcttggggtctcctggcgtcgcgcagctgggtccgaggaatcggccggg  
acaggccggggcggggtctggcgcacgtgaccggggtcggggcagggggcgggccgagcgggagaccagagagccgg

agccggatcccgatcccagTCCGAGCCGCCGCCATGAGCTGCCCGTGCCGCCTGCTGCGCGCTGCTGCTAGTC  
C  
TGGGGCTCTGCCGGGCGGTCCCGGAACGCACTGCTGCTCCTCGGTGAGTGCCGGCGCCGCCCCACGCCC  
ACCTGC  
GGTGGCCCGGGAAAGTGGCCACTGGCCTCCTCCCCACCCGTGGTCAATGCTGACCCTAGT

>NM\_000199-Human-110HSSULPH01\_1chr17-7580850775809207hchr17\_00106  
gccccggcctccgctccgggcaaaatccactccccggccccggcccccccacaaggcctggctccggatcctg  
gggtctccggaggagacctgcccactgacctgcccggctccctggccccgagcaaggccgagggcgcggggacc  
gggtagggacgcgggggggagtggtccccacgggagggccccgcacttcaggactccgctggccccgctggctg  
ccccggcgacccccggcactgtcgcctccccctggctccccgctcgcgcctcgcgggacagggactcaccca  
ctcggcagatgagcttggggtctcctggcgtcgcgcagctgggtccgcaggaatcgcggggacagggccggggc  
ctggcgcgacgtgaccggggtcggggcagggggcgggccgagcgggagaccagagagccggagccggatcccgatcc  
gagtcgagccgcccgcATGAGCTGCCCGTGCCCGCTGCTGCGCGCTGCTGCTAGTCTGGGGCTCTGCCGGG  
G  
CGTCCCCGGAACGCACTGCTGCTCCTCGGTGAGTGCCGGCGCCGCCCCACGCCCACCTGCGGTGGCCCGG  
GAAGTG  
GCCACTGGCCTCCTCCCCACCCGTGGTCAATGCTGACCCTAGTGTGCCCTGCCCTTGTAT

>NM\_000199-Human-111hchr17\_P019360chr17-7580913775809837hchr17\_00106  
tcccctcccagggggcgaacggctctaagaggaagccaacaatgtgtcaagatggggactgggccaagactggaag  
cccacccgtccctcatcacctctctccctgaatccccctgcaaatcctgggtcctctgtccctccatcctcaa  
ctctccagataaagaactgataagcattctcattgagaagtctgaagactaattaggctcaacacttctggccccg  
gagaaccgacttctttgcttttttccgtctccccagggaatataacggggagcagcgcagagagaagctggggccc  
ggcgccaccgtaggctggggggggtcggggtggcagccaggagatccagcggggtccgaggttttcaactgcgacc  
aaggcgggctccaccgctacgggtgactcggcgcctcaggggagagtgggggggtcctcgcctcctgaggccacgcctc  
gctcagccccacctgtggcTTTCACAGCCCTGGAGTTCTAGTTGCTTCTGGGAGGACATCAGAGGCGCCCGTTAAT  
TC  
AGGTGCGCAGCATCTTCCAGGGCCCCGGCGCCCGCGCAGAGCCGCCACCCTCACCCCCAGCCCCACGCCCC  
CGGCC  
GCTCCGCTCCGGGCAAAATCCACTCCCCGGCCCCGGCCCCGCCACAAGGCCGCTGGCT

>NM\_003955-Human-112hchr17\_P020117chr17-7386816273868862hchr17\_01292  
gggggtgtggccatctggcagtagcctgaacccggaaaactgcttccggaaattctctctgtagaattttattcc  
caggtctgacccagcctggggtgtgaatcccccttctcgccactttccagctccggagacagcattcccgcagat  
ccctggcgtgctattccaaggcctgggcccgcagcaccaaaactgcctcccctaggagacccagggcgcctctggc  
ggacgcgggccttaggttggggccatggtccacctgagctctccagcccggcagagacactggccaacccacacc  
ggaccaaccaggttgcagacccagtgatgaaagcgttttcataggggaggggaggggggctccacactcgcgtcagg  
gttgcaaagaacctggcagtgggccgaggctgggtagctgccacgaagggcgctcccctgcagccctgggtctcccctc  
tggaatctccccaggtgaCTGTGACGCTCCAACCTCCGGCTCCCGGTCTGACCCAGCCCCGCTGCTGGCTG  
T  
GGGGTAGCCCCACTTCCCTTTTCGGCTGGCCCGGGCCGCTGACCCGAGTTGGGCCCTCGGGGAGCCCCGGGTG  
GCGGCG  
AGGGGGTGTCCCCGCGGGTCCGGGAAAAGGGGAAGGGGAACCGGGAGGCTCTCCAGGTC

>NM\_003955-Human-113hchr17\_P020119chr17-7386765373868353hchr17\_01292  
gtctcaacctccggtcccgggtctgacccagccccgctgctggctgtgggtagccccactcccttccggtgpc  
ccgggcccgtgacccgagttggccctcgggagggccgggtggcggcagggggtgtccccggggtccgggaaa  
ggggaaggggaaccgggaggtctccaggtcggcctcctagaactcccctctcccgaagcggcggccccgctctgcc  
agaaatcagccttctagaagggaggggggtgggggaaagtgtgaatgagaagttggggggcggagcgcgcgggggag  
ggccgctgcaggaacgcggcgggggtggcggcggccaccggcgcctcggccgctctcgtcgcgtttgtct  
ccgcgcgctcccctggctcccctgctcgcggcccgcctcggcggcccgcggccctccctcacctccgct

cagcctttctctgctgcgagTAGTGACTAAACATTACAAGAAGGCCGGCCGCGCAGTTCAGGAATCGGGGGCGGGGCG  
G  
CGGGCGCCGCTATATACCCGCGAGCGGGCCTCCGCGGGCTCCGACTTGGACTCCCTGCTCCGCTGCTGCC  
GCTTCG  
GCCCCGCACGCAGCCAGCCGCGCCAGCCGCCCGCCGCGCCAGCTCCGCGCGGGCCCCCTTG

>NM\_003955-Human-114hchr17\_P020131chr17-7386667673867376hchr17\_01292  
gctttcccggtttcccctcccctcccgggtcattcccggcaggaggtgacgaggtaggggcagagcggatggaagcc  
ggagatcccagggtcccgaataactccggctggggccttcgggttctcctgtcccctcctaaccctgtcctcgggtt  
tctcctccgtccacaccgcccggggtactggactgagcggcgccaggcagtcggggggcccttctcctgctccca  
cccggccactcctggagacctaactccgcgcgagttcccacgctgcgccttgagtgccgcctgggaagggg  
ctcccggggccaccctgcggcaggggaggagcctgctgggctcctgagggcctggatcggagcgggcccagga  
gagggccccggggcagtggtgccccagtcgctggcgaaggcaggggagccggggcgggcccggcgctggagggtt  
ccgggactcaacgcgctcgcCGCTTCTCTCCGAGCCCCCGGGATGCGGTAGCGGCCGCTGTGCGGAGGCCGCGAA  
G  
CAGCTGCAGCCGCGCCGCGCAGATCCACGCTGGTCCGTGCGCCATGGTCACCCACAGCAAGTTTCCCGCCGC  
CGGGAT  
GAGCCGCCCCCTGGACACCAGCCTGCGCCTCAAGACCTTCAGCTCCAAGAGCGAGTACCA

>NM\_014391-Human-115EP73306chr10-9267062792671327hchr10\_00636  
gtgccttagggcccagatccctcccctcaggctgttaccagggaataggatgtcctgggacaagttcccctaagt  
gaagtgtgatagtctgcttatcagaaagatattactgggggtgtgatagtagggcatctacatttctgataggtg  
gtcatatgaaagtgacaaagaaaaaaggcagtgatgtggtgcaatgtcaacagacagctgtcccctgactcttgaca  
aataggatgacttgctgagcagtgatgaccaccaaaggaatggcctctcacatttctcctgattcacatatt  
tcagcagggttagcttctcccctcctcttcagcttcccagacactgagctggaatgaaattcacctgcctctga  
gttgctcctaatgggggtgggagtggttacttcggttcccaggttgaagattatctcaccggccccagctatataagc  
tgaccggtgtggagggggcccAGCAGGGCCAACCTCCAGGGATTCCCTTCCACGACAGAAAAACATACAAGACTCCTTCAG  
CC  
AACATGATGGTACTGAAAGTAGAGGAACTGGTATGTAAGATGCATTAATTTTATAAAATGAAAAGTGGTTCA  
TCTTGTT  
TTTATTTGAAAATTGAAATGCCCTTTGCTTTCAGGTGTAATGCAAGGGAACCTCTGAAAAT

>NM\_014391-Human-116DBTSS:NM\_014391chr10-9267062492671324hchr10\_00636  
ccttagggcccagatccctcccctcaggctgttaccagggaataggatgtcctgggacaagttcccctaagtga  
gtgtgataagctgcttatcagaagatattactgggggtgtgatagtagggcatctacatttctgataggtgct  
atatgaaagtgacaaagaaaaaaggcagtgatgtggtgcaatgtcaacagacagctgtcccctgactcttgacaa  
aggatgacttgctgagcagtgatgaccaccaaaggaatggcctctcacatttctcctgattcacatattca  
gcagggttagcttctcccctcctcttcagcttcccagacactgagctggaatgaaattcacctgcctctgagtt  
ggctcctaatgggggtgggagtggttacttcggttcccaggttgaagattatctcaccggccccagctatataagctga  
ccggtgtggagggggcccagcAGGGCCAACCTCCAGGGATTCCCTTCCACGACAGAAAAACATACAAGACTCCTTCAGCCA  
AC  
ATGATGGTACTGAAAGTAGAGGAACTGGTATGTAAGATGCATTAATTTTATAAAATGAAAAGTGGTTTCATCT  
TGGTTTTT  
ATTTGAAAATTGAAATGCCCTTTGCTTTCAGGTGTAATGCAAGGGAACCTCTGAAAATGTC

>NM\_014391-Human-117AF131884\_1chr10-9267080692671506hchr10\_00636  
tattatgctgtttagaacacgtaagcatgtcatgtgctaattatggcagtgacatcataaaagaaaagtcattact  
gaatgcttcaatttctataatgatggaaggtggcatgtcatggggcctatttagcccagacatcactccaagaat  
tccaacagatatagacaagtgctttagggccagatccctcccctcaggctgttaccagggaataggatgtcctg  
ggacaagttcccctaagtgaagtggtgataagctgcttatcagaagatattactgggggtgtgatagtagggcctc  
tacatttctgataggtgctcatgaaagctgacaaagaaaaaaggcagtgatgtggtgcaatgtcaacagacagc  
gtcccctgactcttgacaaataggatgacttgctgagcagtgatgaccaccaaaggaatggcctctcacat

ttcttctgattcacatattCAGCAGGGTTAGCTTGTCTCCCTCCCTCTTTCAGCTTCCCAGACACTGAGTCTGGAATG  
AAAATTCACCTGCCTCTGAGTTGGCTCCTAATGGGGTGGGAGTGTACTTCGGTTCAGGTTGGAAGATTA  
TCTCACC  
CGGCCCCAGCTATATAAGCTGACCGGTGTGGAGGGGCCAGCAGGGCCAACCTCCAGGGAT

>NM\_017785-Human-118DBTSS:NM\_017785chr5+168942854168943554hchr5\_00579  
ctctgtagaaaacaggagtaaatctgctcataaggctcgggcttaactgagataatctgtaaactttaacacatgg  
tgggaacttaaatattaacgccagattaccactggtaggggtcatgagatcgacatggtgccaagggtgtctctcca  
ccgccagcccagcgacactgttccctagaaggcattgtcgtaaaaaacaaaaaaaaaaaaaaaaaagaacaacaaaca  
ccaaacacggaaactaaagcaataacttaaagacatgcaggaaaccagccaaggaaaaattatgtggagccactg  
ctgcgctgcgctgcgcaagcccacggcgccacttgacatgcgacagtagctgtaggaggggggtgggcgctccatt  
ggcgcttctcttggttttcttccgcgctggcgacgtctcgtgagacgtgggacttctcgcgggaactgca  
ttcaaatatcccaggcgcttACTCGAGAGCTAGCTGAGCGAATGGGCCGGCAGCTGTGGAGTTAGCGTCTCAATGTGG  
A  
CGCCCTGAGCTCCCATTAGGAGCCGCTGGCTGCGGCAGCAGGGGACTAGCGTGAGAGGTAGGGGCAAGGGGCC  
TGGTGGG  
AGGTGGGTGTGGAGAGCGGCAGTGGGAGAGTCGAACAGGCCCTAAAGAAAGCTAGGGGC

>NM\_019018-Human-119DBTSS:NM\_019018chr5+1463440314635103hchr5\_01068  
cgttctgctgaccagcgggggaagaaaaattagaaaatctcccagtcagtgaacaggtcctggccgacagctgcat  
ctggactccaggctgccaccccggcagtaacagagcagcatcgcgcaacctgcccggggggaaacagcactgg  
ttcctgcctcatcagccggcctccgcgattgtgcttcccaatcaacgggcttcgatgaaaagtccaaggaggctg  
ccggtaccgccaagtggaaattccaagatgtttccggggagcagcctcaggaacgcgctggaccccaggagtagctt  
ccccccgctgcccagcctcggaggttccgcagttctggggcccgcaccccagacgcgcgaggccccgcccctc  
tagggcccgtcctcccctgcccggcctctgattggctgcccggcgctcagtcggtaccatccccgcctacgctcc  
ccccctccccagcccgcTCAGGGAAGCGAGCCCGGGCGCCGGCGGGCGGGCGGGCGGGGGCGGGGGCGG  
AC  
CACGGGCCGAGGCCAGCGCCGTCCGCAGCGCGCCGGCATGGCGGCGACAAGGAGCCCCACGCGGGCAAGGG  
AGCGGG  
AGCGGTCTGGCGCTCCCGCCGAGGTGAGCCTGGGGCCGGGCGGGGCGGGGCGGGGGCGG

>NM\_019018-Human-120hchr5\_P001947chr5+1466229314662993hchr5\_01068  
tattctgtgctggctgcttctctcctcagaccttagccagagaccaccaattctcgggcttctgacctctcac  
gctgctccagatgccaacaggttctctcacatagacttcaccaggaaaaagtcagggtgaaaatgagataattttg  
ggaaagcgtttgttacctattgcagataaataaaattgaaacttttaagccagaaaatgaaaatgctttat  
cccttagaaaagagttctttttgtttcttagagggcgcaaaaattatctgacatttttaacaaatggat  
ataaaatgatataaaactgattgatataaaactgattgaaaataatgtagttttatcatgagtttctttatt  
tttactaatttttcaagtagcttttctgtgatttttttttttttttttttttttttttttttttttttttttttt  
ctgtgccagggcggagtgCTGTGGCGGATCTCCGCTCACTGCAAGCTCCGCCTTCCGGGTTACGCCATTCTCCTG  
C  
CTCAGCCTCCCAGTAGCTGGGACTACAGGCGCCCGCCACTGCGCCCGGCTAATTTTTTGTATTTTTTAGTAGAG  
ACGGGG  
TTTACCGTGTTTTTGATCTCCTGACCTCGTGATCCGCCCCCTCGGCCTCCCAAAGTGC

>NM\_005915-Human-121DBTSS:NM\_005915chr2-136467527136468227hchr2\_01094  
tttctcgtgctgaccaccacaataattgtccacctaccatgcaaggtttagacatctctttgactcttttacag  
ggttttatactgtggtttcattatttctcctaactagacagcagaagcggcttactcttttcttccatagagtct  
tactccgatcgttaataatcagtggaatgattaaagaacattgaaaaaccactcgacaaaacctcagattcg  
aactgttccagcagcaaaaataaccgcccggcactacactgagcagggcgaaggcagatgggctttctccagaa  
gggctttgattggcgcaaatcccttccgtgggctggggctcttggagagggcggcttattggcaggtttggcgc  
gaaatctccagctcctgtgtcacgattggtccggcgtgacaggtcgggaagagggggcgggcggaagcggcgcgcg



gcgcaaaagctgcagcgtctgGAAAAAAGCGACTTGTGGCGGTTCGAGCGTGGCGCAGGCGAATCCTCGGCACTAAGCAA  
AT  
ATGGACCTCGCGGCGGCAGCGGAGCCGGGCGCCGGCAGCCAGCACCTGGAGGTCCGCGACGAGGTGGCCGAGA  
AGTGCCA  
GAAACTGTTCTGACTTCTTGGAGGAGTAAGTCGGCGAGCGCCCCGGGCTCGCCCC

>NM\_013282-Human-122DBTSS:NM\_013282chr19+48600124860712hchr19\_00248  
gggtgggtagagtggggagccctggcaggccctgacgccaggcagtggggctggggcgatcgggagccatcagggtg  
caggtggtctcctagggccccacattccctcagctattacacattgattccggccttcttagacctactggtcaa  
tgcgtgcagtggggggctgcaacggacttgacttaagagttcaggggctgtaccctgggggtcccaaggctcct  
ggggtgtccacgtgcggggggtgaccaggccctgccacgcagccctttgcacgctgggcgcccagcagagcgcgag  
ggctgggaggagccgtggccactaggcggaggcgccgtggacagaggcggggcgccccacccttttctcgttcc  
cgccactgcgtggccaatcaggaggcaggcgcccccccgacggcctctgcggccccgcaactccaaatgccga  
gttttcggggaaaaaatcAGAGCAGCTGGCAGCGCGGCGGCAGCGTTTGGCGAGCGGGCGCTCCGGGTGCACGC  
AA  
GTCCGCGCGGGGTCCGGGCCACGCACGCGGTTTCATCGCCATCCCAGCCGGGCCACGCGCGCAGGCAGACAAG  
CTGTTC  
GCGGCGACCGGAGAGGTGAGCGGGCGGGCCGGGTGGGGTGCCAGCCGGGCCGGGCGCA

>NM\_013282-Human-123hchr19\_P004684chr19+48831454883845hchr19\_00248  
gctggtctccaacttccgacctcagatgatctgctgctcagcctcccaagtctgggattacaggcatgagccaccg  
tgcccggccatgctggttaattttgtattttagtagaggcagggtttaccgtgttggtcaggctggtcttgaactc  
ctgacctcaggtgatcttccgcttggcctcccaagtctggtggattacaggcgtgggacccttggccgctctct  
ctgttctaaagaccagtctgttgattggggccccaccctactgagtgatctcatcttaatatgatttcatctg  
caaaggttctatctacaagaccctgtttccaaaacaatcctattcgtgggtactggggatcagccttgaacatctct  
ttttgaggggacacgggcaaccatacaatttgtacctggaatgtgccttaataatactgtgttctcaacaccag  
cataaagcctgttggaggGCGCTCTGCACACTGTGGGAGGGGCCGTCCACCTCGGCTCGTTTCCCATTGAGGGAA  
G  
GAGGCTTGGTCTTAGCACGGGGTCTAAGGCCGGGCTTTCCTCCCAGCTACCCGGAGAACGGCGTGGTCCAGA  
TGAACTC  
CAGGGACGTCCGAGCGCGCCCCGCACCATCATCAAGTGGCAGGACCTGGAGGTGGGCCA

>NM\_001168-Human-124DBTSS:NM\_001168chr17+7372144873722148hchr17\_01251  
ttgctctgttgcttagctgagtgcaatggcacaatctcagctcactgcacctctgcctccgggttaagcgattc  
tcctgctcagcctcccagtagtgggattacaggcatgaccaccagcccagctaatttttagtagaga  
caaggtttaccgtgatggccaggctggtctgaactccaggactcaagtatgctcctgcttagcctctcaagtgtt  
gggattacaggcgtgagccactgcacccggcctgcacgcttctttaaagcagtcgagggggcgctaggtgtggcgagg  
gacgagctggcgggcgtcgtgggtgaccgcgaccagggcagagccacgcggcgaggactacaactccggcaca  
ccccgcggccccctctactcccagaaggccggggggtggaccgctaagagggcgtgcgctcccacatgcccc  
cgggcgccattaaccgccAGATTTGAATCGCGGGACCCGTTGGCAGAGGTGGCGGCGGCGGCATGGGTGCCCCGAC  
GT  
TGCCCCCTGCCTGGCAGCCCTTTCTCAAGGACCACCGCATCTCTACATTCAAGAACTGGCCCTTCTTGGAGGGC  
TGCGCC  
TGCACCCCGGAGCGGGTGGAGACTGCCCGGCTCCTGGGGTCCCCACGCCCGCTTGCCC

>NM\_001168-Human-125hchr17\_P014590chr17+7373020073730900hchr17\_01251  
ggtggtggcgatgctgtaatccagctactcgggaggctgaggcaggagaatctctgaaccgggaggcagaggtg  
cggtgagccaagatcgtgcttggcacaccagccaaggcaacaagagcgaagtccgtctcaaaaaaaaaagtaattttt  
ttaagtaacctctgcagcaacaatccaataaaggcttggtttttaagtagtagaggagttagggtta  
taaaaaataggttaggaaggggctcctgattgctaattgtattgtcatttggcccttaggagagagctctgtagc  
agaatgaaaaattggaagccagattcaggagggactggaagcaaaagaatttctgttcgaggaagagcctgatgttg  
ccagggtctgttaactggacatgaaggaaggctctgacttctccaggagtttcaggagaaaggtagggcagtg

ttaagagcagagctctgcctAGACTAGCTGGGGTGCCTAGACTAGCTGGGGTGCCAGACTAGCTGGGGTGCCTAGAC  
TA  
GCTGGGTACTTTGAGTGGCTCCTTCAGCCTGGACCTCGGTTTCTCACCTGTATAGTAGAGATATGGGAGCAC  
CCAGCGC  
AGGATCACTGTGAACATAAATCAGTTAATGGAGGAAGCAGGTAGAGTGGTGCTGGGTGCA

>NM\_198584-Human-126HUMCAIII1\_1chr8+8653783186538531hchr8\_00164  
gcaataaactcgacaagtgtccagagatcgtagccagacagccagcctgcgcttgaagcaactttaagtgaggctg  
caagagccgcccgggatgtagatttagtctgtggccaagcacaactacgacacccctgcctgccccacccatcccca  
agaatgcatggaggaaggagagaggacgaggtgaggccgctgcatttctgcacgtcggcggtagaacctgca  
gtttgagagagaagaaggagatggaggggagcagcactccgggagagcgcagggagggcggtgggtgccc  
cttcgcccactccgccccctcacctcgacagctgtcccgtcttgaattcattggcttctctaccgctcccaa  
acaccacccaatctagttagtcccccccccacccctgcctgacctaataaggccatgcagtgtcgggggagctacat  
aaaagcgcgggctcgcggcgACTCTGCACCACGCAGGGGAAGAGAAAGCAGGAGCCGTCCAGCACGGAGGAAGGCCA  
CCA  
TGGCCAAGGAGTGGGGCTACGCCAGTCAACAACGGTGAGTGCAGGCAGCCGCGACCCGGCCAGGAAGGGATGCC  
AGTCCAG  
GAGAGCCCTGCCATTGCACAGAAATGGGCAACTTTAGAGACTGCAGTGGAAAATGTAGGA

>NM\_198584-Human-127hchr8\_P006196chr8+8634462486345324hchr8\_00164  
gtcctcttaacagcgacccccgccccttagctgagcgacccgggaggttacatagtgtcttaacttaagccactg  
gtttctcgaggaaatgctgagaggatctaattgggaaaactgggtacacgtcttagtaagaccctgcccacgataagc  
cctaataagtagtattttcagtggtggtgattaccatgctcattattgtttgtattgtaacatcactgccacga  
ccatcaccgaccttttacgctccaccgggatccccactcccagcctggcagttccaggctctggtgactcattcac  
ttcctggaagtctctaggcaacactttcctctcccgagtgcagactcctcagaaggcaggagatccccccgaaacct  
ttctctcctgctctccctcaactcaatctctcattcccaggtcacaactaagagagactcgcgcccaggagtcag  
ccagcggcgggcgcttcCCCGCACGCCTCTGCCGTCTGGAGGACGCAGGCGGGAGCGCCCCGGACCGGGTTCAGG  
GT  
CTCGACTCCTGCCGCGGGCGCCCCGCGGTCCCGCCCTAGCAGGTCCTTCCCGGGCCCTCCCGCTCCCTCCT  
CTTTC  
TCGCTGCTCAGTCACATCTTTCTTCTTCCCTCCACCCCGAGGGACCATGTCGAGGCTCAGC

>NM\_031966-Human-128EP74161chr5+6849826568498965hchr5\_00061  
aagaatgctattaaagcctttcatgaactatattattgctgctaccgtagaaatggaagtgtgcaactagatccaa  
aactactttgacacttctgagactgtggccgctctgtcaccttcaaaggccactaggcctttctgagctggcat  
tggcaacgcacactctgcccggtaaccttccaggtggcgccgactggcttactgctctccaggtggccgctgca  
gctgcccagagcgcagggcgagggcagaccagtgagagcctggccagcctccggcctagcctcactgtggccccg  
cccctctgaacgcttcgctgatcgcctggaacgcattctctgcgaccgagcccaatgggaaggagtgagt  
gccacgaacaggccaataaggaggagcagtgccgggttaaatctgaggctaggctggctctctcggcgtgctcggc  
ggaacggctgtgtttctgCTGGGTGTAGGTCTTGGCTGGTTCGGGCTCCGGTGTCTGCTTCTCCCGCTGAGCTG  
C  
TGCCTGGTGAAGAGGAAGCCATGGCGCTCCGAGTCAACCAGGTGAGCCGCTTCGGACTGCGAACTAACGCGGC  
CTTCTTA  
GCTGCTGCCTGCTCTCCCTGCCTCGCCTGCGGGAGCCTCCCGAGCGGGAGAGGGCCCGCAG

>NM\_031966-Human-129DBTSS:NM\_031966chr5+6849823568498935hchr5\_00061  
accagagagtggtgcaacgatcaaatgaaagaatgctattaaagcctttcatgaactatattattgctgctaccgta  
gaaatggaaagtgtgcaactagatccaaactactttgacacttctgagactgtggccgctctgtcaccttcca  
aaggccactaggcctttctgagctggcattggcaacgcacactctgcccggtaaccttccaggtggcgccgact  
ggcttactgctctccaggtggcctgagctgcccagagcgcagggcagaccagtgagagcctggccag  
gccttccggcctagcctcactgtggcccccccctctcgaacgcttcgctgatcgcctggaacgcattctctgca  
ccggcagcccaatgggaaggagtgagtgcacgaacaggccaataaggaggagcagtgccgggttaaatctgagg

ctaggctggctcttctcggcGTGCTGCGGCGGAACGGCTGTTGGTTTCTGCTGGGTGTAGGTCCTTGGCTGGTCGGGCC  
T  
CCGGTGTTCCTGCTTCTCCCCGCTGAGCTGCTGCCTGGTGAAGAGGAAGCCATGGCGCTCCGAGTCACCAGGGTG  
AGCCGC  
TTCGGACTGCGAACTAACGCGGCCTTCTTAGCTGCTGCCTGCTCTCCCTGCCTCGCCTGC

>NM\_031966-Human-130HSU36838\_1chr5+6849828568498985hchr5\_00061  
ttcatgaactatattattgctgctaccgtagaaatggaaagtgtgcaactagatccaaaactacttttgacacttctg  
agactgtggcgcgctctgtcaccttccaaaggccactaggccttctctgagctggcattggcaacgcacactctgcc  
cggctaaccttccaggtgggcgccgactggcttactgctctccaggtggcgcgctgagctgcccagagcgcaggcg  
cagaggcagaccagtgagagcctggcaggccttccggcctagcctactgtggccccccctctcgaacgccttcgc  
gcatcgccctggaacgcattctctgaccggcagcccaatgggaagggagtgagtgccacgaacaggccaataag  
gagggagcagtgccgggtttaaactgaggtaggctggcttctcggcgtgctgcccgaacggctgttggttctg  
ctgggtgtaggtccttggctGGTCGGGCCTCCGGTGTTCCTGCTTCTCCCCGCTGAGCTGCTGCCTGGTGAAGAGGAAGC  
C  
ATGGCGCTCCGAGTCACCAGGGTGAGCCGCTTCGGACTGCGAACTAACGCGGCCTTCTTAGCTGCTGCCTGCTC  
TCCCTG  
CCTCGCCTGCGGGAGCCTCCCGAGCGGGAGAGGGCCGCAGGAGCGATTGGGGAGGAAGG

>NM\_001786-Human-131EP74295chr10+6220775762208457hchr10\_00431  
tttccatttcttctaaggtcactgaaatgtgctcctggagccagcccgaatcacgatttagaaaaacataact  
atacactcctaaccctaagattagaagtgaagtaatggaatctcgatgtaaacacaatatcactttttgatgagcta  
ttttgagtataataaattgaaactgtccaatgctgggagaaaaatttaaagaagaacggagcgaacagtagcttct  
gctccgctgactagaacagtaggacgacactctcccactggaggagagcgttgcctcgcactcagttggcggccc  
cctctgcttttcttagccgcttcttcttcttctcgcctctagccaccgggaaggcctgccagcgtagctgg  
gctctgattggctgctttaaagtctacgggctaccgattgggtaatccggggcctttagcgggtgagttgaaact  
gctcgcacttggcttcaaagCTGGCTCTTGAAATTGAGCGGAGAGCGACGCGGTTGTTGTAGCTGCCGCTGCGGCCGC  
C  
GCGGAATAATAAGCCGGGTACAGTGGCTGGGGTCAGGGTCGTGTCTAGGGGACGGCCGAGGGCCTCGGAGGGC  
GAGTATT  
GAGGAACGGGGTCTCTAAGAAGGCCGGACTGGAGGTCAGGGATCTGCGCGGGGCCCGC

>NM\_001786-Human-132HSCSC2GNA\_1chr10+6220774162208441hchr10\_00431  
gaggcggcttttgagtttccatttcttctaaggtcactgaaatgtgctcctggagccagcccgaatcacgcat  
ttagaaaaacataactatacactcctaaccctaagattagaagtgaagtaatggaatctcgatgtaaacacaatatca  
ctttttgatgagctattttgagtataataaattgaaactgtccaatgctgggagaaaaatttaaagaagaacggag  
cgaacagtagcttctgctccgctgactagaacagtaggacgacactctcccactggaggagagcgttgcctcgc  
ctcagttggcggccctctgcttttcttagccgcttcttcttcttctcgcctctagccaccgggaaggcc  
tgcccagcgtagctgggctctgattggctgctttaaagtctacgggctaccgattgggtaatccggggcctttagcg  
cggtgagttgaaactgctcGCACTTGGCTTCAAAGCTGGCTCTTGAAATTGAGCGGAGAGCGACGCGGTTGTTGTA  
GC  
TGCCGCTGCGGCCGCCGCGGAATAATAAGCCGGGTACAGTGGCTGGGGTCAGGGTCGTGTCTAGGGGACGGCC  
GAGGGCC  
TCGGAGGGCGAGTATTGAGGAACGGGGTCTCTAAGAAGGCCGGACTGGAGGTCAGGGAT

>NM\_001786-Human-133HUME2FB\_1chr10+6220757962208279hchr10\_00431  
taaaattctgatgaaaatatttaaattaaatacatttcaaatgttttaattgataataaacaacaaatgtaataa  
taaaataatttaataataaattcaaaaatgaggtagaacaaagcacagcgatataataataaatttcttcttatt  
ttgaggcggcttttgagtttccatttcttctaaggtcactgaaatgtgctcctggagccagcccgaatcacgc  
atttagaaaaacataactatacactcctaaccctaagattagaagtgaagtaatggaatctcgatgtaaacacaatat  
cactttttgatgagctattttgagtataataaattgaaactgtccaatgctgggagaaaaatttaaagaagaacgg  
agcgaacagtagcttctgctccgctgactagaacagtaggacgacactctcccactggaggagagcgttgcctcgc

cactcagttggcgccccTCCTGCTTTTTCTCTAGCCGCCCTTTCCTCTTCTTTTCGCGCTCTAGCCACCCGGGAAG  
G  
CCTGCCAGCGTAGCTGGGCTCTGATTGGCTGCTTTGAAAGTCTACGGGCTACCCGATTGGTGAATCCGGGGC  
CCTTTAG  
CGCGGTGAGTTTGAAGCTGCTCGCACTTGGCTTCAAAGCTGGCTCTTGAAATTGAGCGG

>NM\_001786-Human-134HUME2FB\_2chr10+6220763262208332hchr10\_00431  
attgtataataaacaataatgtaataataaaataatataataaattcaaaaatgaggtagaacaaagcacagcgat  
ataaataataaatttctttacattttgaggcggcttttgagtttccatttcttcttaaggtcactgaaatgtc  
tccttgagccagcccgaatcacgcatttagaaaacataactatacactcctaaccctaagtattagaagtgaag  
aatggaatctcgatgtaaacacacataatcactttttgatgagctatttgagtataataaattgactgtccaatgct  
gggagaaaaattaaaagaagaacggagcgaacagtagcttctgctccgctgactagaacagtaggacgacactctc  
ccgactggagagagcgttgcgctcgcactcagttggcgcccgcctcctgcttttcttagccgccccttctcttt  
ctttcgcgcttagccaccGGGAAGGCTGCCAGCGTAGCTGGGCTCTGATTGGCTGCTTTGAAAGTCTACGGGCTA  
C  
CCGATTGGTGAATCCGGGGCCCTTAGCGCGGTGAGTTTGAAGCTGCTCGCACTTGGCTTCAAAGCTGGCTCT  
TGAAAT  
TGAGCGGAGAGCGACGCGGTTGTTGTAGCTGCCGCTGCGGCCGCGGAATAATAAGCC

>NM\_001786-Human-135hchr10\_P004297chr10+6220316462203864hchr10\_00431  
gaagggcaaaaataatggactctgggttctcacatggaagaagaatgaaagataaccagcagctctctgcagcatctat  
tataagggcattaatccattaatgagggaaaagccctcgaggttaataatcacctcccgaagccctacctcttaata  
ccatcaccttggggttaagtccaacatatgcatttagggggcacataccttcaaattatagcaatccgcaagtat  
atacactcaggccctatggaacctacactacccttggccatatccagccacgtggatgtcccacagtaactcactatc  
aatatgccc aaagtatgctccatgccccatagctgccccttagcatctcttagaacagcaggacctcagcctgttgc  
aaagccacacccaagtatccctgatgactccttctcccttttaaccagctcccagctcctaaaaatatctcattg  
tcatttctctcttgaacTGACATCTCCCAAGTTCAGCACCTGCTGGGACTGTTGCAGAGCCCTCCATTGTCTGCTG  
GCTCTGATGCTGCATCACCAGCCCTCTTCATGACTTTTCCCCCTAACTCCCCTTATGACCATGTCCTGCTGCT  
TGTTCA  
CATTTTTTTGTTCAAGTCCAACGTCTAATCCAAAACCTTTTAGCATGACCTTGAACATTAC

>NM\_001786-Human-136hchr10\_P90019chr10+6220941662210116hchr10\_00431  
aaacaaaatttctaatgaacagctgaacacattttagttctgtcctcataacttaaaaaataatgtttgaataaa  
attaggagatcataaagcggataaatttggtaaatattgggtataacttggcacgcaggtactctttaaagt  
gtcaca aaaagggaacataattctggttttggtaagaatagacaagttgatactgaattgagggttatttga  
ttggaagaagctaaataactacactagatagaatatacacgttccaatgtctcaggagcaagaaggatggaagtat  
tgtaggagcttaccctgtaaatattggttgaatgtaataatattatggaatacttagctgcagtaggactgtg  
gaaaatgctttacatatagtttcatatgcttaaaactactcaggttagtgcatgtaattaagtcagttttcctt  
cactttaggatctaccatacCCATTGACTAACTATGGAAGATTATACAAAATAGAGAAAATTGGAGAAGGTGAGTGG  
TT  
TTAGTAAAATAAATTTTATGGAATGATTTAACAATGCTACAACCTTCTGTAATATGAACACATTTAAATATTT  
ATTAATAAT  
TCAACCATTAAGTTGTCTTGTAGTACCAGTGTGCATTAACATATGTTCTTTACTTAATAA

>NM\_001254-Human-137DBTSS:NM\_001254chr17+3569716235697862hchr17\_00764  
ctttgactttgcgaggtgagcattagagagtaaggaaagtgcttagcatcatacctggcgacagaacccaaaacgg  
taggtatcatgtagcagttctgaaaatctagccatcaggatgatgcaaatgggtactttaggcagtgagaaggggaacc  
acacttgacacttccagtcgaaggaagagtgcgactgcgaggcagcaagactacgctccagcgtgctttgcgggg  
gccggcccgtttaccagagtcgcccgtccgaatcgcgctcttccaccaggccccggatgtagattccctcccc  
gttcagtgctggtgctcacagcactcaagacttgggctctcattggctgtaactcttccactggattggtagc  
aaaaaaagagggcggtgccaaggcgaaggctctgtgactacagccaatcagaatcaggccgggctttggcgggaggtg

ggaacgctgtggccattcgATTTGGCGCGAGCGCGGCTGGAGTTTGTGCTGCCGCTGTGCAGTTTGTTCAGGGGCT  
TG  
TGGTGGTGAAGTCCGAGAGGCTGCGTGTGAGAGACGTGAGAAGGATCCTGCACTGAGGAGGTGAAAGAAGAG  
GATTGCTC  
GAGGAGGCCTGGGGTCTGTGAGGCAGCGGAGCTGGGTGAAGGCTGCGGGTTCCGGCGAGG

>NM\_001254-Human-138HSA9560\_1chr17+3569717035697870hchr17\_00764  
tttgcgaggttgagcattagagagtaaggaaagtgcctagcatcatactggcgcacagaacccaaaacgtaggtatc  
atgtagcagtctgaaaatctagccatcaggatgatgcaaatgggtactttaggcagtgagaagggaaccacatctg  
acactccagtcgaaggaagagtgactgcgcggcagcaagactacgcctccagcgtgctttgcgcgggccggccc  
gcttaccagagtcgcctgcccgaatcgcgctcttccaccgagggcccgatgtagattcctccccgttcagtg  
gtcgtggcctcacagcacttaagacttgggctctctcattggctgtaactttcactggattgtagcaaaaaag  
aggcgtgccaaggcgaaggctctgtgactacagcaatcagaatcaggccggccttggcgagggtgggaacgct  
gtggcattcggattggcgCGAGCGCGGCTGGAGTTTGTGCTGCCGCTGTGCAGTTTGTTCAGGGGCTTGTGGTGGT  
G  
AGTCCGAGAGGCTGCGTGTGAGAGACGTGAGAAGGATCCTGCACTGAGGAGGTGAAAGAAGAGGATTGCTC  
GAGGAGGC  
CTGGGGTCTGTGAGGCAGCGGAGCTGGGTGAAGGCTGCGGGTTCCGGCGAGGCCTGAGGT

>NM\_018101-Human-139EP73236chr1+3782676137827461hchr1\_02238  
gggctgctctgtctgcccaccgcccactgcccgaagttcggcctgaggagcttggggcctgaggagcggcagcgt  
ggcagccagccagtcaatcagtcagagggtcacggcggcccctcggtactcagtgccagccagccagaagaagcagc  
cgccaacctggagcagaatcctacagccgacctgacctagtagggccccagccctccagagcttggggtattgcagagc  
cgccacaaggcctgcccggagtagtagttgtatagttcgagccggccagggcggagccgggtgggttgggtgggagg  
cggggaacaagcctggaccacaactcccaggagtagccgcgacggcggcggcctcgtgtcgactcaggtatagggg  
gctgattggcggaagaccctgggcccaggaactgctgtgattggatggtgtgggacggcggcttctcattcgtca  
gcctgtgactgtggagtttGAATTGGGTGGCGGTTGACTGTAGAGCCGCTCTCTCTCACTGGCACAGCGAGGTTTTGCT  
C  
AGCCCTTGTCTCGGGACCGCAGGTACGTGCCTGGCGACTTCTTCGGGTGGTCCCGTCCGCCCTCCTCGTCCCT  
ACCCAG  
TTTCTTGCTTCCCTGCCCCATCTCCGCCGCTCCCCGACGCTCCGCCGAGCGCCATGGCT

>NM\_018101-Human-140DBTSS:NM\_018101chr1+3782676037827460hchr1\_02238  
ggggctgctctgtctgcccaccgcccactgcccgaagttcggcctgaggagcttggggcctgaggagcggcagcgt  
aggcagccagccagtcaatcagtcagagggtcacggcggcccctcggtactcagtgccagccagccagaagaagcagc  
cgccaacctggagcagaatcctacagccgacctgacctagtagggccccagccctccagagcttggggtattgcagag  
cgccacaaggcctgcccggagtagtagttgtatagttcgagccggccagggcggagccgggtgggttgggtgggagg  
gccccgaacaagcctggaccacaactcccaggagtagccgcgacggcggcggcctcgtgtcgactcaggtataggg  
ggcgttggcggaagaccctgggcccaggaactgctgtgattggatggtgtgggacggcggcttctcattcgtc  
agcctgtgactgtggagtttGAATTGGGTGGCGGTTGACTGTAGAGCCGCTCTCTCTCACTGGCACAGCGAGGTTTTGC  
T  
CAGCCCTTGTCTCGGGACCGCAGGTACGTGCCTGGCGACTTCTTCGGGTGGTCCCGTCCGCCCTCCTCGTCCC  
TACCCA  
GTTTCTTGCTTCCCTGCCCCATCTCCGCCGCTCCCCGACGCTCCGCCGAGCGCCATGGC

>NM\_018101-Human-141hchr1\_P010809chr1+3782615137826851hchr1\_02238  
aaccccttgacatggctttagaccgcatcacaggtgaaaagcaccatcaacaatcagccacaaaccgtcaag  
agctcggcgtctgcccgtccagtcgcccggcctgagactcagcctgagctacagcttcaactagccttagcct  
tctgggtctcagcaactcttgagcaatcaacctgtggcctgggagatcaagatgcacagttagcacctccga  
caggaccggtctggcggggtcgcctctacagcccattcccaggcccagccagcagaccagagctgcctcctg  
ccctgggtccctggagcctggtggcggcgtcatgctgagcaccgtgtggcagctccaagcgcactacttga  
cctgaagtcagccccgctgcgaccagtcgaggcgaacacgcgaactggcgaggagtggcggcccggggg

agcgaggaacgacagggttCCCCACTCGCTGCCAGACTGGCCGCGGGATAGCGCGCCCCCCCCAAAGCCTGCACCC  
C  
TGCCCTGCTCCTCTATCATTCCGTCCCCCTTGTCTGTCAAACCTGCCGGGGCTGCTCTGTCTCTGCCGACCCG  
CCACT  
TGCCCGAAGTTCGGCCTGAGGAGCTTGGGGCCCTGAGGAGCGCCGACGTAGGCAGCCAGC

>NM\_030928-Human-142hchr16\_P014436chr16+8739717287397872hchr16\_00166  
cgatctctgacatcatgatccgcccgcctcgccctccaaagtactgggattacaggcgtgagccaccgcccagcca  
gaaatagtttaaaaaaagaaataaggagcgtgcccgcgggggaagcgcctttaccagctcagcctgagcccccc  
aggccgcccgtcctcggtccccgggagcgcgggggtttgtcaggcgcgctgctgttgcctggattgcgctca  
tttgaccctgaagccagcggccccactgacacgcctgaaaagtgggagccacacgcgggatccggagaccgctaaa  
gtcccacgcagcagcggcccggcgagtcacgcccgcagtcggcgcgatgcgcggccaagccggtgcccgcgcc  
caccagcgcgatgcgcgcccgtccttccctccccgtgctctgccccgatggttcggtccgcccggggggcggggc  
cagggcggccgcggaattTGGCGGAACCGCGCCCGCCTCTTCCTCCCTTCCTTCTTTCCTTGCTTTCGCCGCGCAC  
T  
CCGCCGCATGGAGCAGCGCCGCGTCACCGACTTCTTCGCGCGCCGCCGCCCGGGCCCCCCCCGCATCGCGCCGC  
CCAAG  
CTGGCCTGCCGCACCCCCAGCCCCGCCAGGCCCGCACTCCGCGCCCCGGCCTCCGCTACC

>NM\_006614-Human-143DBTSS:NM\_006614chr3+212987213687hchr3\_00324  
tagggcaaaaattgtgagatagtagaatctgtaaatttaagcatgcacaattgacagcggatggtcgtagcatatt  
tgtaaatcaatagcaagccccaccacgccctaaatgaaggaaagcaagaagcaattttaatacgtacatggacca  
caccctctaagcagcagcaatgggagaaaagcagattggcgacctgtgtgcaaatgaaccgagtgaaaccatcggg  
gaggggggtgggggctttcttttaaatgtcgcttttgagataaacgagcagggatcctaccttttgaccggagatg  
ttgaaaagcagaccaaagttttggcttggctcttcttccacaagagataaagtctgaagcctgtaactctccct  
gtcccgcgggagcgtgcaaaggggagagataagcggcgtgggtgaggggtggcggcgagaaccaggaagggagcag  
aggcgagagccagcctccggCAGGAGGGCGTAGACCCCGGTGCCAGCCAGAACGGCTCCAGCCTTCCCGCGCCAGAG  
AG  
CCAGCGGCGGGAGGGGACGGGCGGGACCTCCGCGGACAGCCCCGGGTGCGGACCAGCGGGCAGCGGCCGGCGA  
GACCCTC  
CCTGGATCCGCCAGAGCTTACCGGACCCTGCGCGCCCCCGTCCCGGCTCCCGGCCGGCT

>NM\_080387-Human-144hchr12\_P90012chr12+85569028557602hchr12\_00610  
actcttttctcactagaaagtcttgggatttaataactgctctatctctctcaactcgaaaacaaaggtt  
gctgtgtcttcacatgcatgtacacacaaggtatactttaaagttttgttcattgttcattgtcttttctctct  
tagactcaacttttattcagtcagagaacttttagtatagaactcaccacaagaatataactgccttgaaatata  
atattcacaanaaagaatttaaaaagaggggacatttactaaattttattgggcataacaatttttttagggcgtt  
gctaaatttttctaaatgaaaaaaaaaacaattgagaaattccacattcactgatctagtatcaacatac  
ttgtgggttctactaactgttgggtattgcttctcaatttcttttttttttctcctcatctcccgaat  
gtatcaaaggaaaccctgtCTTTGAAAAAGACTTCTTTTGGAGCTAACTTCTTATACTGGTACCTTTCTAATCTCAC  
TA  
CAATATGTAACATTGGTGTTCGATCTCAAGTATTTCTGAATATATTCCCCTATCCACAGAAATATACTCTGGG  
GGAAAAA  
AAATAGAACAAATTCTTGCCGTCCTGACCATTGAACAAGAGACTAATTAGACAATGGGGC

>NM\_014358-Human-145hchr12\_P90185chr12-85846108585310hchr12\_00448  
agcggagatcatgccactgactccagcctggagcagagcagactctgtctcaaaaaaaaaaaaaaaaaaaagatg  
aaaaaattcaggttgccatgtcctaatacatacactatagcccagcttggctatggtgtctaagtctctttcag  
ttacaaatgtgtggatggtacagatccaaagtgaattcagagtgagagtgagctccatattgtcaaggaaaaactg  
ggggatgagttatgcttgaagaactagagacatttggccaacgaaacgaacaacatttaaaaaaaaaactctcctg  
ttccccatggctagcctattgtgtgatgcttaccattcataatttctcattttgtgttacatggagtgagaga  
actgacatgctgccaataaacttctgtcctccttagcaagaaaggaatcctgacttaaatgcgtagccacagaaca

agttaattctacatctatCGGAGCTGAACTTCCTAAAAGACAAAAGTGTTTATCTTTCAAGATTCATTCTCCCTGAAT  
C  
TTACCAACAAAACACTCCTGAGGAGAAAGAAAGAGAGGGAGGGAGAGAAAAAGAGAGAGAGAGAAAACAAA  
AACCAAAGA  
GAGAGAAAAAATGAATTCATCTAAATCATCTGAAACACAATGCACAGGTAAAATCTGCAA

>NM\_022570-Human-146DBTSS:NM\_022570chr12-1017392410174624hchr12\_00304  
gctcatagtaattgttcaataaatgttattttgttgaatattcctgataattcccaaagagatttgtttctctgtctgtt  
gttacaacaatgcatctcctcatgccatccctcattacatctatatatttcctttattaagcaatgagtttctcat  
aggtatcatttttctgtattgtaagctcctaccaattgaaaaggtgggcatccagtacctgtttatgtaatttaaaa  
atacatgaataaatacatgaacaagttatggtaaacttgagcaccaaaactgaaatagttgcatcgggttaaattaat  
taatgtcagacttagttgtgagagtaatgaaggcagcataagacattaatgtatgcatttttctacatttggctgaaa  
caaagactcatctgctatgctgccttttagtttctgagtcagcagctcagaaaacagatctaaaggtacaaatggaa  
aattaccacagcatagtttcATTTCTGCTCTTGAATATCTGGTTGAACTACTTAAGCTTAATTTGTAAACTCCGGTA  
A  
GTACCTAGCCCACATGATTTGACTCAGAGATTCTCTTTTGTCCACAGACAGTCATCTCAGGAGCAGAAAGAAA  
AGAGCTC  
CCAAATGCTATATCTATTCAGGGGCTCTCAAGAACAATGGAATATCATCCTGATTTAGAA

>NM\_007074-Human-147EP73364chr16+3010192830102628hchr16\_00568  
ccaccatgcttagatctcagagccaggcaagaccaggtcccgggggtccaggagcgcgctcggggctcctcctcgc  
cgccccccgcgcccctcgcgccccccgcgccccccgcgcccctcgcgctcgcgctcggggccgggaggaagggcg  
cgagccggggccggggcgggaccgaggcctggcgggcccgggctggggcgcttctgctgctccagggaaggtcggcga  
ggaggctggggcgggagcagggaggaagaagcaatgggggtgctcttgcgttttgacattttaaaaagaagtttagat  
cgctcccggagccgggatggcagcctgcgctatggttggggaccaacgtggtgcacgggcaggggcccgggagagagg  
ggccgcagcgggagcccgggagcgcagggcgggctggaagagctccgcccaggggcgggccaccccgaggcgggg  
gcacggctgcttctcattcaTTGTCTTGACAAGAGCATCTTCAGCGGGCGAGTCCCCGGCTCCTCCAGCTCCTTCCTCCT  
CTTCCTCCTCCTCCACCTCCGGCTTTTGGGGGATCACTGTCTCTCTCGGCAGCAGGTGAGGCTGGGCCTG  
GGAGGC  
GCGGGTGGGCCGGGGCGAGGGCCACCTGTGGGGCGGCGCGCGCTGGGAGCCGCGGGCTG

>NM\_007074-Human-148DBTSS:NM\_007074chr16+3010192730102627hchr16\_00568  
gccaccatgcttagatctcagagccaggcaagaccaggtcccgggggtccaggagcgcgctcggggctcctcctcgc  
cgcgccccccgcgcccctcgcgccccccgcgccccccgcgcccctcgcgctcgcgctcggggccgggaggaagggcg  
gcgagccggggccggggcgggaccgaggcctggcgggcccgggctggggcgcttctgctgctccagggaaggtcggc  
aggaggctggggcgggagcagggaggaagaagcaatgggggtgctcttgcgttttgacattttaaaaagaagtttagat  
tcgctcccggagccgggatggcagcctgcgctatggttggggaccaacgtggtgcacgggcaggggcccgggagagagg  
cggccgcagcgggagcccgggagcgcagggcgggctggaagagctccgcccaggggcgggccaccccgaggcgggg  
cgcacggctgcttctcattcATTGTCTTGACAAGAGCATCTTCAGCGGGCGAGTCCCCGGCTCCTCCAGCTCCTTCCTCC  
TCTTCCTCCTCCTCCACCTCCGGCTTTTGGGGGATCACTGTCTCTCTCGGCAGCAGGTGAGGCTGGGCCT  
GGGAGG  
CGCGGGTGGGCCGGGGCGAGGGCCACCTGTGGGGCGGCGCGCGCTGGGAGCCGCGGGCTG

>NM\_006495-Human-149DBTSS:NM\_006495chr17-2666499926665699hchr17\_00028  
tggttacctgcagttggtgaggcattatacatgttatattatgctatcttatttaactctcacaataaccaataaat  
attccttagaggagaaacggtgactcagaagtgcagagcttgcctaaggtcatacaagtaaacagaacacatcactc  
acttctatgagaagaaatctcactgtaagtataaccaactggcagcttttcttcttagaacatgtaattttctctc  
gggactccatcctaaatatttaataataatcattactagatctcaaatatttattacataattaaaagcac  
tcaaatcatagggctccaaatgtaatttcaaaataagttctgttaaagtaataatattcttagtcatttgggttatt  
gcattccggaaccagctattgataaactcctcttttctacagaaactattcagtttgctagaggaacattttaa  
ctgaattgaaccaccatttTCCTTTTAGCCAAATCACAAAATGTCCAGTTAGAACAAGAATTTAGCATTCTGCAA  
A

AGAAGTTAACAGCTGAGGTAAGAAAATTTTCACACAATTTGGTTTTGATCTTGCTTTATATAAAAATTTATTTT  
AAAAACTG  
TCATTAGTGTTTTAACTTAACTCTGATAGTCTAAAGATGTCTATAACAGGTTTTTTGTG

>NM\_006495-Human-150HUMNEUROF\_2chr17-2666497926665679hchr17\_00028  
ggcatttatacatgttatattatgctatcttatttaacctcacaataacccaataaaaatattccttttagaggaggaaac  
ggtgactcagaagtcagagctctgcctaaggctacacaagtaaacagaacacatcactcacttcttatgagaagaaac  
tcactgtaagtataacccaactggcagctttctcttagaacatgtaattttctcttcgggactccatcctaaatatt  
taatttacataatcatattactagagatctcaaatattttacataaataaagcactcaaatcatagggctccaaa  
atgtatttcaaaaataagttctgttaaagtaataatcttagtacttttggtttattgactccggaaccagctat  
tgataaactcctctttttacagaaactattcagtttgctagaggaacattttaaactgaattgaaccaccattt  
tccttcttagccaatcacCAAAATGTCCAGTTAGAACAAGAATTTAGCATTCTGCAAAAAGAAGTTAACAGCTGAGG  
TA  
AGAAAATTTTCACACAATTTGGTTTTGATCTTGCTTTATATAAAAATTTATTTTAAAAACTGTCATTAGTGTTTT  
AACTTA  
AACTCTGATAGTCTAAAGATGTCTATAACAGGTTTTTTGTGGTTTTGTTGCATAGAATTA

>NM\_001523-Human-151hchr19\_P025068chr19-5691892756919627hchr19\_00150  
aggtgagaagggggaggtggggagagctttaaagcaagaagagaaagaaatgagggtagaggaggcaagagaagtgag  
aggaagaagggatggagagaaagacagaaactggagaaatgtgtaattggggagagagatgagggtaccaaaaagag  
atgaggagaaatagtgggtagggagaaagaaagggatggagggaaatacagggataggggatgggggatgagggaac  
cccaaaaatcaagtgaggtggaagagaaaaatcaggggagacaagggacgagaggggggaggaagagagaagaagacat  
agaggagggagggagaggaggggagtgatggcagagaggactagaggagggcgcgggtagacatgggggctgggaag  
ggaggccctgctgctgaggggggtgggagtaatagcgggaagcgggtggagctgccggctgggctgacctcagagc  
ccctggcccagcttagcctgACTGACGTCAGCGCTCGCTCCCCCCCCGCTGCGCTGGTCTTCAAATGACCCCCCTCCA  
GCTCTCTGGCCACAGAGAGGCTGGGAGAGCAAGCCGGAGAGAAGAGAGAGCCCCGCCAGACCCACTGCGATGA  
GACAGGT  
GTGTGTGTGTGTGTGTGTGTGTGTGTGTGTGTGTATACAGCCATGTGGGGAAAAC

>NM\_001523-Human-152hchr19\_P025071chr19-5691480556915505hchr19\_00150  
tttctgtaataaaaataatttggggcccgaggtagctcatgcctgtaatcccagcacttaggaaggccggggcag  
gcaagtacttgagcccaggggtccagaccagcctagtaatgtaggagacccccggctctacaaaaatttaaaaat  
tagccaggagttgtgacactctttagtcccagctactcgggaggtgaggtgggaggtgagcctgagctcgggaa  
gctgaggctcagtgagcctagatggcgacactaggctggagtgagaccctgtctcaaaagaaaaaaaaaaaaaacg  
aaaggagagagaaagggagagcagagcagagagagagagagagacagcagacagacagagagagaaagataaaga  
gaaggaaaggacggaggagggagagagagagagggaggggaaagggaaggagggaaaggaaaggatttttaactt  
tctctggaggaggtcatgCGCCGGGACTCATGCCCTTCTTTCCTTCTCGCTCCAGCAGGACGCGCCAAGCCC  
ACTCCTGCAGCCTGCCGCTGCTCCGGCCTGGCCGGAGGGTGCTGACCATCGCCTTCGCCCTGCTCATCTGGG  
CCTCAT  
GACCTGGGCCTACGCCGCCGGGTGCCGCTGGCCTCCGATCGCTACGGCCTCCTGGCCTT

>NM\_003641-Human-153hchr11\_P000102chr11+303352304052hchr11\_00954  
acgcctaggtcatccagcactcacccaaccaaagccatgggaattgctgggaccggaaggtagggggtggcacatgtg  
tgccctgtgctctgaagctgcccctacagcccctggaatcctccccgtctcaacacactaccctctggggagttagtt  
ctcccagagtcctctgggctggagggtgctttggggcaggaacttggccaccagcctctgacctgcacc  
aggagacactgggaggttagtcccaaacccgcacagagcaggactgcagcctgaggaaagagcaaggatttcaggaga  
gaggcctgcgacaagttaggtgagggctttggggattgtctggcgctggagtgtggggcctggcagggccctga  
accggacagttaggtcctgtacttctggcctgggtggacagaaccaagcctgggtaaaatcccaggggccccctaa  
accacacttaggaagtcaCTAGTCTGACTTGAGTTTTCTGATGAGGAAGCCTCTCTCCTTAGCCTTCAGCCTTTCCT  
C  
CCACCCTGCCATAAAGTAATTTGATCCTCAAGAAGTTAAACCACACCTCATTGGTCCCTGGCTAATTCACCAA  
TTTACAA



ACAGCAGGAAATAGAACTTAAGAGAAATACACACTTCTGAGAACTGAAACGACAGGGG

>NM\_006060-Human-154hchr7\_P004800chr7+5011980850120508hchr7\_00737  
tgcattgtcctaccctgaggaggtcctcttggctttcatcgtctcctatgggtcttcacgccttcccgaaccaccgcg  
cccaagcaggagcacgttctcgccctcttcacagggcgctcctctcaggggtgccgggattttattctgtgctt  
tcctggtggctcctacaagtctggaaggcaggaggcgcatctcactcctctgggtcccctcccctagcgcctggcgga  
gcccaggctgcatttgggaattcatgacttttctcctgctcaagctgaacacattgctggctcctgctcgggtgga  
gccccgtaattagtgaggggctccccgtagggcgaaggggtgcgctgtcagatgtggcattcccgttttacggagac  
acacgggtgttacacgccaggagaggtctgagacgcaaagaccgtcagcgggtgctgggattgctcgtgtcacc  
tccgctgcagccacccttcGCACGCACTTGTGTGTGCACCCAGGCCAACATGGAAGGCGCCATCCTAACTTCTGCCG  
T  
GAGCAGGTGGGAGGGAAGAGAGACGAGAGGTATTCCATTGGTTGTCTGGGAAAATGAATTGCACCTTCCCCTC  
CCTTGGC  
GAGGATCAACTTTTCCCACCCCTCGGGTGGGCACTCGCATCCTGGGGCCGGAGCCTGAA

>NM\_006060-Human-155hchr7\_P004816chr7+5012042150121121hchr7\_00737  
atgaattgcacctcccctccttgcggaggatcaacttttccccccccctgggtggcactcgcacctctggggccgga  
gcctgaaccgggagcaaggggccccagttccagggagctgaagctgagcgtacagcggcgctcccagacactgggga  
aagtgtttacgatgtcccagtcctccagctcgcagcggggcgagcgtgaggggtgccccgaccgaccagcggcccc  
gggtgcaggggtggcgggccccggcgcgcgctccccctccccctctggggcccgcagctgtcggcgcgccgcccc  
cacgggttacgcgcggtcccgcagcggcgccgagccgggtgcccggcccggacacagcggcgccgcccgcac  
ccgtcggggccgcccgcgatgctgcgctggaatgaggaagcggcgggcaggggagggccccggcgcggtgcgcccg  
ggggtggcgggcgccgAGCGGGCCCCGCGCGGGCGAGCGGGCTGCAGCCGGCGGGCGCCAGCAGGTACGGCC  
CG  
CACCCGCCGCCGCCCGGGCGCCTTTGGGGGCTGAGCCGGAGCCCGGCGGATTGCAAAGTTTTCTGTGCGGGC  
CCCTCT  
GGCCCCGAGTTGCGGCTGAGACGCGCGCCGCGGAGCCGGGGACTCGGCGACGGGGCGG

>NM\_001560-Human-156DBTSS:NM\_001560chrX+117642895117643595hchrX\_00725  
ttcacaagcacagtactgccagtgcccccaactccaccagtgaaagtagggctggtattactaacctggagtgcgcg  
ctagcaacaagggtcagaggtcaagggctggaagccaggtctccagactcccaggccaaggctctttccgagatga  
ctctgtctgtgtccagcagggcacagcccctagacctccgagggcccgaagtgtgctggcagcggcgacccggct  
ccgccacgcggaggaggagggcccagcagcggggagtgggcgcgacgtggtggaagaagttttgtcggctcagaga  
ccggacgcgggagctcgggtgggccaaggtgtccagcctgggagccgtaggagccgagccagagccgagccggcg  
gccccccccctcctcggcgcctctcggcgtcaggtacctgagccggtggggggggcgccctcccgtctgc  
gcccggccccagctccaggGCGGCGGAGCCGGGAAGTGGAAGAGGGAGCGAAGGAGCGGGGACTGCCAAGGCTCC  
AGC  
CCGGCCGGGCTCCGAGGCGAGAGGCTGCATGGAGTGCCGGCGGGCTCTGCGGGCTGTGGGCGCTGCTGCTCT  
GCGCCG  
GCGGCGGGGGCGGGGGCGGGGGCGCCGCGCCTACGGGTGAGTGCGACCCTCGGGGCCCCGA

>NM\_001560-Human-157AB031393\_1chrX+117642860117643560hchrX\_00725  
atgtattgccagcttcaaatatgccctttgtcctttcacaagcacagtactgccagtgcccccaactccaccagtg  
aagtagggctggtattactaacctggagtgcgcgctagcaacaagggtcagaggtcaagggtggaagccaggtctc  
cagactcccaggccaaggctctttccgagatgactctgtcctggtgtccagcagggcacagcccctagcacctccgag  
gccccgaagtgtgctggcagcggcgacccggctccgccacgcggaggaggagggcccagcagcggcgagtgggcg  
gcgacgtggtggaagaagttttgtcggctcagagaccggacgcgggagctcgggtgggcccaggtgtccagcctgggag  
ccgtaggagccgagagccgagcggcgccccgccccctcctccggcctctcggcgtctcggcgtcaggttacc  
tgaggccggtggcgggggcgGCCCTTCCCGTCTGCGCCGGCCCCCAGCCTCCAGGGCGGGAGCCGGGAAGTGAAG  
AG  
GGAGCGAAGGAGGCGGGGACTGCCAAGGCTCCAGCCCGGGCGGGCTCCGAGGCGAGAGGCTGCATGGAGTGGC  
CGGCGCG

GCTCTGCGGGCTGTGGGCGCTGCTGCTCTGCGCCGGCGGGGGCGGGGGCGGGGGCGC

>NM\_001560-Human-158chrX\_P007403chrX+117643696117644396hchrX\_00725  
cctcgcgagggccccgcgctcggcggtcgcgcttcccgcgaggatctctggggcccggtactggggccggttcgaggtg  
ggacccgggagctcgggggtttcccgaactccgggtcggcgagggtggcggcagcgaagtaagagggtcgcgacttgt  
agtgggaagagcccaggaggctggcgtccaggcgtcggggggggggggccgaaacatgccacggcgtcagaggccg  
tgggtcagcggcgaatgtcctgtgagcccgggaggaaatgaggcgcagagccggcggggaccacgaccgaagtcc  
aggcgagctgagaacgcgccggggctcttggccgaggccgcgccaatcctactgtctaagggtggctcttgcgagtgg  
aagtgaagggaacctctaacatctcagctctgttgaaaaaggacgtgacgctcatgacctccttggtcgaagaa  
atccttgggaaatccagaaTAGCATCCCGGAGATGCTCCCCCACCCACTCTCTTTAATAAACCTTATATTTTAGG  
G  
TAATTGTAGATTTATGGAAAAGTTGCAAAGATACTTCAGAGAGTTGTGTATATCCCTCACCTGTTTGGTAAC  
TTCTAGT  
TAATCAACCTGGCAGTTGTGAAAAATTGGGAGTTAATGACTTCCTTAGGAGCAGCTCCTG

>NM\_000576-Human-159EP17079chr2-113310386113311086hchr2\_00307  
cagcaccgaagtagagaccacacctcaatacagacagggagggtattggccttcattgtaccattatccatct  
gtaagtgggaagattcctaaacttaagtacaagaagtgaatgaagaaaagtatgtcatgtataaatctgtgtcttc  
cacttggccacataactaaatthaacattcttaacgtgggaaatccagatthtaagtggacatcaactgca  
caacgattgtcagaaaacaatgcatatttgcagtgatacattgcaaaatgtgtcatagttgctactccttgcct  
tccatgaaccagagaattatctcagtttattagctcccctcccctaagaagctccaccaatactctttccccttctt  
taacttgattgtgaaatcaggtattcaacagagaaatttctcagcctcctactctgctttgaaagccataaaaacag  
gagggagaaactggcagataCCAAACCTCTTCGAGGCACAAGGCACAACAGGCTGCTCTGGGATTCTCTTCAGCCAAT  
CT  
TCATTGCTCAAGTATGACTTTAATCTTCCTTACAACCTAGGTGCTAAGGGAGTCTCTCTGTCTCTCTGCCTCTTT  
GTGTGT  
ATGCATATTCTCTCTCTCTCTCTCTTTCTTTCTCTGTCTCTCCCTCTCCTTCCCTCTCTG

>NM\_000576-Human-160DBTSS:NM\_000576chr2-113310387113311087hchr2\_00307  
acagcaccgaagtagagaccacacctcaatacagacagggagggtattggccttcattgtaccattatccatc  
tgaagtgggaagattcctaaacttaagtacaagaagtgaatgaagaaaagtatgtcatgtataaatctgtgtcttc  
ccacttggccacataactaaatthaacattcttaacgtgggaaatccagatthtaagtggacatcaactgca  
acaacgattgtcagaaaacaatgcatatttgcagtgatacattgcaaaatgtgtcatagttgctactccttggcc  
ttccatgaaccagagaattatctcagtttattagctcccctcccctaagaagctccaccaatactctttccccttctt  
ttaacttgattgtgaaatcaggtattcaacagagaaatttctcagcctcctactctgctttgaaagccataaaaacag  
cgagggagaaactggcagatACCAAACCTCTTCGAGGCACAAGGCACAACAGGCTGCTCTGGGATTCTCTTCAGCCAA  
TC  
TTCATTGCTCAAGTATGACTTTAATCTTCCTTACAACCTAGGTGCTAAGGGAGTCTCTCTGTCTCTCTGCCTCTT  
TGTGTG  
TATGCATATTCTCTCTCTCTCTCTTTCTTTCTCTGTCTCTCCCTCTCCTTCCCTCTCT

>NM\_000577-Human-161HSIC1L1RA\_2chr2+113591199113591899hchr2\_00210  
ggcttcccggccactttccctaaaatagccaccactcctaggtccctcaaaagcatatcctgcttggattttcccta  
tagcaatagccctatgaagtattttatttgtaactgtttctgtctgtttccttggtagagcgtggggacctt  
gtctgcttgttccaatgcctggaagagtgctggcacacaggattaagccaacacatagtttgaatgaatgtgtgc  
acacatgcatgagctggcggcagtcgggggtggggtaagcacgaaggccagctcagttctctgcatgtgacctccatc  
ttacgcagataagaaccagtttggttctgtagcctgagtcacctcctgaaactgggctgcttggcatcaagtcag  
ccatcagccggccatctcctcatgctggccaacctctgtgagtggtgggagggtgggctcctcctgtactc  
tctgaggtgctctggaaggaGGGGCAGCTCCACCCTGGGAGGGACTGTGCCCCAGGTACTGCCCGGGTGTACTTTAT  
GG  
GCAGCAGCTCAGTTGAGTTAGAGTCTGGAAGACCTCAGAAGACCTCCTGTCTATGAGGCCCTCCCCATGGCT  
TTAGGTA

AGCTCCTTCCACTCTCATTTTTTTCACCTGAGAAATGAGAGAGGAAAATGTCTACAATTGG

>NM\_000577-Human-162HSIL1RECA\_1chr2+113600915113601615hchr2\_00210  
aaaatattactatctcgtcctttacagaatgtttccaatctatggtccggagtccaaggctgtccattttcaaagaa  
caciaagtacatgagactgtccatgtgcaggagccctatcattttattatgaaaaaacggcctttctgctcaaact  
gttttttaaaagtcaacaaacagactctgggtacctgtcaggaacagtagggagttgtttccattgtctcttcttc  
ccaggaactcaatgaaggggaaatagaatcttaattttggggaaattgcacaggggaaaaaggggagggaaatcagttac  
aacactccattgcgacacttagtgggttgaagtgacaacagcaagggttctcttttgaaatgcgagggatt  
tccgtctctcagtggggaggggtggcagacgcttagctgggtgagtgactattctttataaaccacaactctgggc  
ccgcaatggcagtcactgcCTTGCTGCAGTCACAGAATGGAAATCTGCAGAGGCCTCCGCAGTCACCTAATCACTCT  
CC  
TCCTCTCCTGTTCCATTCAGAGACGATCTGCCGACCCTCTGGGAGAAAATCCAGCAAGATGCAAGCCTTCAG  
GTAAGGC  
TACCCCAAGGAGGAGAAGGTGAGGGTGGATCAGCTGGAGACTGGAACATATCACAGCTG

>NM\_000418-Human-163hchr16\_P006346chr16+2723228127232981hchr16\_00852  
gagttgggtaaacatttattgaagaatgtgcaaccactctcacttggagccgggctgtaggaaggggagggattcc  
agtcgccagccctccccaccaaacgcaactgccccggcgaaaagaggccgaggagggcaggcagggcaggtcctgg  
aggcctggtcggcgtgggcttttattccgagaccaaggggatcactgcagagttctcgtgggctgacctcgggct  
acggcgtgggaggaagcgcggcgaagacacccagcaggtgctgggctgccccaggagaggacggcggctcggactg  
tccggcggcggcgggacagcagcagggcgcgaggtggcgggacccgggcccggcgccgggcccggcgcgca  
tgcaaatctcggggcgggggagcaggaagccggggcgggctgggtctccgcgccaggaaaagccccgcggg  
cgggggccaggggaagggccaCCCAGGGTCCCCACTTCCCGCTTGGGCGCCCGACGGCGAATGGAGCAGGGGCGCG  
CA  
GGTAGGATCCGGGGCCCCGCGCGGGATCGGGTTGCGAAGGTATCGCCCCGGCACGCGGCTGAGGGCGTTCCG  
GAAGGGC  
TCGGCCCGCGGGGACCACGGGACCACCCGACTCCGAGCGGGGCCGAGCCCCGGA

>NM\_000418-Human-164hchr16\_P006361chr16+2726312527263825hchr16\_00852  
ggaaaaaaaaacaaaaacaaaaaactcgtaccctaaattatacaataacaaaaaaaaaaaaaaaaaaag  
gaaattgtgtggccttgaagtccaaatattaactatctggcctttacagaaaagtttgacaccctggcctagcc  
cgtgagatgtgggttggtgtaaggtggaacattggaattatctacgatggcacaactgtgcgatgcagagcttatgt  
tgtttaaattaattagtgccaccggttcttctttcatgggctttcaggaacaagctaagtcccaggaccagggccgg  
cagctaggcaggtgtgaggagcatccttggtgatgtgtaagaggctgtggccagcaagagaggcaaccctagtcggct  
gccccagcacaccctggccctcccaagccccagatctgtctcatcctgatcgggaagctggaagagtctgatgc  
ggttcctggaggcatgtcccGGACACAGCTGTGGGGCCAGCCAGCCTACAGGTGACCAGCCTAACCCAGCCCCTGTGT  
C  
TGCAGAGCCCACACGTGTATCCCTGAGAACAACGGAGGCGCGGGGTGCGTGTGCCACCTGCTCATGGATGACG  
TGGTCAG  
TGCGGATAACTATACTGGACCTGTGGGCTGGGCAGCAGCTGCTGTGGAAGGGCTCCTT

>NM\_002250-Human-165DBTSS:NM\_002250chr19-4897680648977506hchr19\_00051  
tttgggtgtggctctttgtgtcagagaaagttgtgacaactttgagtgaatattgtgctgtgtgtggacggtgtttg  
ggtggctgtgtgtccacgggataactgcctgcttctaagtgtggtgtgtgtcacaccatgtgtgtggtgtctgggtg  
ggctgtgggttcagagcttctgggagttgtgagtcactctgtgtaggtgtgtgtgtgccctggtgtgttagtctcc  
gtcttgggctgtggagtgtcctcgggtctgggtgtggtgagtagaggtgtgtgtcaaaagtagacaccattgtgtg  
gaaaaagccatcgtgtgtgtgtgtcttaccacgtggatggacgtctcttctgtctgtccccaaagacacacc  
ctagcccctcttattctcaaaagggggagctggggagcctccccctaccctggggcctccccctccccccctg  
cctggccctcaccactccccAGAGGGCACAGGGCTCTGCTGTGCCTCAGAGCAAAAGTCCCAGAGCCAGCAGAGCAGG  
CT  
GACGACCTGCAAGCCACAGTGGCTGCCCTGTGCGTGTGCGAGGTGGGGACCCTGGGCAGGAAGCTGGCTGA  
CCCCAA

GACCCCGGGGCCATGGCGGGGATCTGGTGCTTGGCCTGGGGCCTTGAGACGCCGAAA

>NM\_002250-Human-166AF305731S1\_2chr19-4897711448977814hchr19\_00051  
gttttgaatcatcactgcgagcactgtgttcgagtcacaggcgccacaatgtatgtcaattcttagctctgggt  
gattgggggactataggtatgtcctaagtgtgtgtctacacgtattgggttctgtccaagggtgtgtagtgt  
taggaaactgggactgcacagtgtttgtcgggtgtgtgtgtggcatcaggcgctcactacttaataatattgtg  
gtttgtgtaacacctggtgatgttgtgttggccacagttgtgcatcgtcctattgtggtgttgggtgtggc  
tctttgtcagagaaagttgtgacaactttgagtgtaaatattgtgcctgtgtgtggacgggtttgggtggctgtgtg  
tgccacgggatactgctgctgtaagtctggtgtgtgtcacacatgtgtgtgtgtctgggtgtggctgtgggtt  
cagagcttgcgggagttgtGAGTCACTCTGTGTAGGTTGTGTTGTGTGCCCTGGTGTGTTAGTCTCCGTCTGGGCTG  
T  
GGAGTGTCTTCGGTGTCTGGGTGTGGTGTGAGTAGAGGTGTGTGTACAAAAGTACAGACCATTGTGTGTGACAA  
AGCCCAT  
CGTGTGTCTGTGTGTGTCTTTATCCACGTGGATGGACGTCTCTTTCTTGCTCTGCCCAA

>NM\_002250-Human-167hchr19\_P028804chr19-4897044348971143hchr19\_00051  
gtttcaccatgttggccaggctgtctcaaactcttgacctcaagtatccaccaccgcagcctcccaagtgtggga  
ttacaggcgaagccatcgcgccggccatggcttattgtgatattattacagttattacgcgtgtcaacc  
gaaaggggagtaggagcagctccaggcatgtggaatgcaagctctagggaggcaggggggtctgttgggttactgtgt  
atccttagcacatagaacaatgtcaggcacacagtcggcgctcagtcagtgttcaaaggctggaagtggtgaaactag  
tgggttgggtgggtgggaaggagaaagtggaagatgtcttctcaagtctgtcccgtccctccctatccctctc  
ccgcctgactccctccctcctggccaggcggcacacccactatctcagggcgagcaggcgccggccgcgcctg  
acctgcgcctgacctgtccTGACCCCTCCCTTCTTGCCCCCTACCGGCAGCTGTTTCATGACCGACAACGGGCTGCGG  
G  
ACTGGCGCGTGGCGCTGACCGGGCGGCAGGCGGCGCAGATCGTGCTGGAGCTGGTGGTGTGTGGGCTGCACCC  
GGCGCCC  
GTGCGGGGCCCCGCGTGCAGGATTTAGGGGCGCCGCTGACCTCCCCGAGCCCTGG

>NM\_005564-Human-168DBTSS:NM\_005564chr9+127990785127991485hchr9\_00327  
attctgggctcatgagttcagagcagacgcctgttttcttctgtccactgtcagccacccacccttccctgacctt  
aaaagaaccaggaaacagcacatgatctgttgaaggaggcattcattcttcttctgtgggtgtggggaggggacca  
cagggcacataccccaccctgggatccagctgagcaggggggtcagagatgacagctcttccggctcacaggccaccggc  
ccacatacagggaatcagaagaaagaaacagcacaaggaaggcacagagggagtcgttgcctgccagaggtgcagca  
ctccgggaatgtccctactctcccgtccctctgtcttcccaatctgaccaggtgcagaaatcttccaagtgttc  
cgcaggaggtgtggcaattgcctcacattctggccttggcaagaatgaatcaaccacccctagatccataaatagg  
gccaccaggtgagcctctcACTCGCCACCTCCTCTTCCACCCCTGCCAGGCCAGCAGCCACCACAGCGCCTGCTTCCCT  
CGGCCCTGAAATCATGCCCTAGGTCTCCTGTGGCTGGGCCTAGCCCTGTTGGGGGCTCTGCATGCCAGGCC  
AGGACT  
CCACCTCAGACCTGATCCCAGCCCCACCTCTGAGCAAGTCCCTCTGCAGCAGAACTTCC

>NM\_005564-Human-169HSNGALGEN\_2chr9+127990789127991489hchr9\_00327  
tgggtccatgagttcagagcagacgcctgttttcttctgtccactgtcagccacccacccttccctgaccttaaaa  
gaaccaggaaacagcacatgatctgttgaaggaggcattcattcttcttctgtgggtgtggggaggggaccacagg  
gcacataccccaccctgggatccagctgagcaggggggtcagagatgacagctcttccggctcacaggccaccggccac  
atacagggaatcagaagaaagaaacagcacaaggaaggcacagagggagtcgttgcctgccagaggtgcagcactcc  
gggaatgtccctactctcccgtccctctgtcttcccaatctgaccaggtgcagaaatcttccaagtgttccgca  
ggagttgtggcaattgcctcacattctggccttggcaagaatgaatcaaccacccctagatccataaatagggcca  
cccaggtgagcctctcactcGCCACCTCCTCTTCCACCCCTGCCAGGCCAGCAGCCACCACAGCGCCTGCTTCCCTCGGC  
CCTGAAATCATGCCCTAGGTCTCCTGTGGCTGGGCCTAGCCCTGTTGGGGGCTCTGCATGCCAGGCCAGGA  
CTCCAC  
CTCAGACCTGATCCCAGCCCCACCTCTGAGCAAGTCCCTCTGCAGCAGAACTTCCAGGA

>NM\_002298-Human-170DBTSS:NM\_002298chr13-4565416845654868hchr13\_00246  
caataagatcactgtaggagactccagagaggtttgatttcaggtgggggtgggctttccaaggaagtcctttcat  
ttgttcaggtgtagtccaccttttccctggctcttctactaaaaatgaaaaattgttgatcttctgtaagtagg  
taggcatctgggctttgctttgcaactagagtcaaagaagcaagttatcaggctgatctgccttgctatctagaatc  
agaaaggttaagtagcccaggactactcaaagacagctggaggagaaagggagagagaaaaatgcttataaagaggtg  
ggcaaaagagcgggacctgtctcaaaaaaaaaaaaaaaaaagaggaaagtgtaggaggtgctgaattcactgtgacc  
tgtctgtcaggtgatttttggggggcggggacatgaaaaaaaaagttaaaatgtccttataaagacaaaatcttttct  
ttcctggctgatgattgtcATTCTAGTCACTTCCTGCCTTGTGACCACACACCCAGGCTTGACAAAGCTGTTCTGCAGA  
TCAGAAAGAAGGGTTCCTGGTCATACACCAGTACTACCAAGGACAGCTTTTTTCTGCAAGGTAATGTTCT  
TCATGTG  
TTTTTGTGGTTTTAAGCGCTTGTGATGCACTTCGGCACTGTTTCTGTGGATTGTGGGTT

>NM\_002298-Human-171hchr13\_P010098chr13-4559965845600358hchr13\_00246  
tttattcagttctgtgactcttctgctatgctgtagcccaagagaatactcctggtgtgagtcaaaaagtggc  
agcacgtgctgtagtgctcacacctgtaatcccagtgctttgggaggtgaggcaagactctcttgaggccaggagt  
tcaagcccagcctgggcaacatagtgagaccctgtctcaaaaaaaaaaaaaaaaaacttaacttaaaaaaaggcag  
gagctgaagaggtctccaaggacaaataatacactgataatgatcacgagactagccagcaagtctgatgctttgtcag  
aatctttgggtgagccaaaattgtccacaaaagtgtaggatgctggtgactgactccagccactgcaggagtgagtc  
tgtctgactatggaacgactgtgactgtgacctccaggtccattcgtgtgtgttctcaggctctccttattttt  
cctcttttcccttttagaTATGCCATCTCTATGGCCCCGAAAAATGGAGCAAGAGTGTATGCCCTGCCAGAAGACCTG  
GTTGAAGTGAACCCCAAAATGGTCATGACCGTGTTCCTGCCTCATGGGAAAGGAATGAAGAGGGTGTGAG  
GCCCAAT  
GGGGCTGGGTGGGAGGCGGTGCACTCACTCCTGACTGCCCGGCACAGATGCTCCAGGGAT

>NM\_002317-Human-172DBTSS:NM\_002317chr5-121441756121442456hchr5\_00173  
gttataaaatattcactgtaggaataaattgtaaccatttctcatattacctacacagaaaaacaaaattgtat  
atcctggggtttatttctgtagggcgcttcccataaaagcgagagagtgctggtgggaaatgtgctggttaactctt  
tatggataaactttagtcacaatctccccgccccctctcacccccagcaccctccaactcccactcccgcctc  
tcaagggctggtgactaatagcattttctctgcatattttggcgctcccccatggcctggctgcctcgcctgtct  
gagtttttgaattcctgcatgttcgcccagattaagccagtgtctcaggatgtgttccgttttgtctttccc  
cttaacgctccctgtgcaactgtctggggggaggagggcagggacgggagagaggggaggggagggcagggcagggagctgtc  
cgccttgacggtttcaatGCATTACGTGAACAAATAGCTGAGGGGCGGCCGGCCAGAACGGCTTGTGTAACCTTGC  
A  
AACGTGCCAGAAAGTTTAAAATCTCTCCTCCTTCCCTTCACTCCAGACACTGCCCGCTCTCCGGGACTGCCGCGC  
CGCTCC  
CCGTTGCCTTCCAGGACTGAGAAAGGGGAAAGGGAAGGGTGCCACGTCCGAGCAGCCGCC

>NM\_002317-Human-173hchr5\_P019661chr5-121440413121441113hchr5\_00173  
acctgcccagcccagccgctggacggcatggtggcgacgaccttaaccctacaagtactctgacgacaacctt  
tattacaactactacgatacttatgaaagcccagacctggggcaggtaccggcccagatacggcactggctacttcca  
gtacggtaagtacccccaaagctccgctggaagcaccctgtcacctggtccccagctatgtgcttctcagctggctgct  
ggcgccggggggccccgctcctcgcagatccgatccccacgcgctcagtgagcagcctggaatccagtgcaaa  
ccgctgctggtggccctcctgcttctttcacattgctttgagctccggcgctccccagttcttctgctgctcctccg  
tccactctgagctccgggtggcggaaggtgaggagtaagggactagaggggtaggagttggagcggggggcgccggg  
ttgttctactgctgcgcccTCGCCTGCTGACGTTTAGGTCTCCAGACCTGGTGCCGACCCCTACTACATCCAGGCGT  
CCACGTACGTGCAGAAGATGTCCATGTACAACCTGAGATGCGCGGCGGAGGAAAAGTGTCTGGCCAGGTACGG  
GCTGATA  
TGTCTGAGGCCCCGCTCCCCGGTCTACCTTCAAGGGGCGCTCTGGTGCCTGGTTCTGACT

>NM\_007161-Human-174hchr6\_P003404chr6+3166144931662149hchr6\_00845  
ccagaatgctgctcctacaggaagtcacctgtattgcccacacctcttctgtaccaactgtaccaacttctt  
gtccttgatctatccagggctcatgtagatctagatggtgcttactctcatgtttgtaatcagacagccaag

cagcctgctcatagagctgcagaacaccaagtgggtcaccagaacaccaaatatgccagagctcccagtctgaactgga  
gcagggtacatgtgtccacagacatatccaagatcaagaggtctcaacagatgcagtgtgaagaggaatagagaagagt  
taatcaaggaagacacctgaaggtgggtgtttgctgactagtggcaggatcagtgaatgactggagctgaggcaga  
ttatggcctagctacagcccagaagttgaaaagaagatgttgaaccctaaccctggagccgaacttcctctccta  
acaatgctggggaggaaccAGGCTGGGGGAGAAGTTAAAGCCAGAGGAGGGGCAGGAATGTCTGAGGTGGCAACAC  
TTC  
TCTTCAGCCAGACAGCACTGGCCAGTTTGGAGTCTGTCCATCCTGCAGGCCACAAGCTCTGGGTAAGCTGGGA  
ATGGGCA  
GGGACCTTGGTGAAGGATGGTCACACCCCAGAGTGGGGTGAAGCTAAGATGAGGGGAGG

>NM\_007161-Human-175hchr6\_P003405chr6+3166195431662654hchr6\_00845  
gggggagaagttaaagccagaggaggggcaggaatgtctgaggtggcaacacttctctcagccagacagcactggccag  
tttgagctctgccatcctgcagccacaagctctgggtaagctgggaatgggcagggaccttggggaaggatggcac  
accccagagtggggtgaagctaagatgaggggagggagagatgggtttgagttcctgggcccgtcaggaatcctctg  
agtctctgtccccaaagaaattaagacaattcatttctgtgccacggcccttatggcctccacctgcacttctgctc  
cccacccccagaattcctcttaaacccagaaggggtcccagttccagaccctagtcagtaatactggctctggggtgaa  
gagaacggcccccttccacctcaaacaggaaccagtggtggaggggaggaagtcctgaggggaagttaggggcc  
cagatactcctcatgccccACTTCAGCCCTAGCAGCATCTGCCTGTGGGAAGCAGCTCTCCACACCAGCCAAGGGGC  
C  
CCCACACTCCC GCGCTGCTCTGCGGCTCAGGGAGCAGCCCACCTGCTGGGTGTGCTGATATCACCTCCCTTCT  
TCCCC  
CAGTGCCACACCCACCCAGGCCAGGCTCCTTCCCTCCATCATCCCTTACCAGCACC

>NM\_007161-Human-176hchr6\_P003406chr6+3166289631663596hchr6\_00845  
acataagggaggtcccagcctgggaacgattataacagagggcccctcacttcacagatgaggaactgaggaagtc  
accagcccctgatcattcgctaaagagcaaggactagattctctgacctccagccagtcctgatccctgacctaa  
tgttatcgcggaatgatggtaagtaagtgctcttgcatctgcatagagagagtctgggagcttaggaagtgatgggg  
aacagtgatgatgagctcatgactaggtggacaggcctctggggacagctggtacaggagggaaagggacctcacggg  
aggcccagaaactgtaagaggtgaggtattaaggtctgggatggagaagctctgagggatattttctgctctaaa  
actgttgagaggggaatctgagaaagctgcaaccaaccagggaggctggggtacgctggagaaggaatgggcttccaa  
ttgagccctcttccctgaagATATATGTATCTACGGGGCCTGGGGCTGGGCGGGCTCCTGCTTCTGGCAGTGGTCCT  
C  
TGTCCGCCTGCCTGTGTTGGCTGCATCGAAGAGGTGAGCGCTGCACTCCCTCCCTCCCCCTGCAGCAGTGCCCC  
CTGTGC  
CCCCACCCACACGCTTTCCTACTGCTTTCAGAACTGCCTGGCCCTGGAGCCACT

>NM\_007161-Human-177hchr6\_P003408chr6+3166349031664190hchr6\_00845  
tgagcgtgactccctccctccccctgcagcagtgcccctgtgccccacccccacgcttccactgctttccca  
gaactgctggcctggagccactgggaagccaacaggggagtcacgctgctggtgggggagccccggagggggcc  
gggagaagcacaaggggtgggtgtgtgagcttcttcttttccagtaagaggctggagaggagctgggtgagct  
ggggacaggggaaggggagggcaagagagatcctgagtggtgagtggggagaagcatggctgagcgtgagaggaggt  
tggggacgggagacaaggagagagaaagtaggagcatgagagaggcagagaaaatcgaggcaaaagagaaagagaaatg  
agacagaaccaagagaaaaagtgagacagaggataggagagacagggagaaaatgagagtgagagagacacaagagaa  
gagcaatgaaagagagagagAGAGAGAGGCTCCAGAACCAGGCACAGTGGCTCACGTCTGTCATTCCAGCTATCGCA  
AGG  
CTGAGGCAGGAAGATAGCTTGTAGCTCAGGGTTGAAGACAATCCTGGACAACATAGTGGGACTCTGTCTCAA  
AGAAAAA  
AGAGAGAGAGAGAGAGAGAGAGAGAGAGGGAGAGAGAGAGAGAGAGAGAGGGAGAGAAGTAA

>NM\_021201-Human-178DBTSS:NM\_021201chr11+5990208059902780hchr11\_01302  
gagaatgaaacacccaaaagaagtaacaaggagacacggaatttccacaggtgcttccagcttaccagcctgga  
aagtgagagaatagatttccaaaattcaaaactaactattatcaatatttattgtctacttttgaactctt

tgcattcttttcttaattctcccaacaccacagagtgaattattatccatccaccatttatttaatagacaag  
aaaactcaggctaagcaaaactagatgacttaataattctatgtaggagtagggaaaatgaattttaactgggaccgta  
caaatcactagtctgcacaaaggctttttctcatgtgtcacttctatcttgtgtcattttgccagacctcagaatttag  
aaagaggaagcagaggcactttttatatacaactgtctgtaactacagcaaaattcacatcctgtgtaatacaataac  
tgctctaagaaaggacaggAAGTCTCAGAGGCTGGAGAGCAGAGCACCAAGATCGTTCTGGCAGGAACAGCCAGTG  
GGA  
GGTTCCAGCTGAGCGCTCCCAGAGGTGAGCTGATCCCAGCCACAGCACACAGGACCAGGCTGCGAGAACAG  
GTAGACA  
CCTTGGTTTAGATCATGACTTTTGGGGAAGATTGTGTGCTTTTGAAAAGACAGCCAGGGA

>NM\_022346-Human-179DBTSS:NM\_022346chr4+1748837317489073hchr4\_00758  
gtctcccttcagaggtggcgggctccgaacgcgctacgaacttctttgtcgcgtctctgaagcggagccct  
cgtgtgggatccccgccttcggccacaaggaggtgttatcctcggcagatctcccgtctcactcttgaggatc  
gcttttcttttagcctcacgctcagccgacgacccagccaggcctaaccgagcagccctcccctccggggcaag  
gccactccgctcagctcccgcgacgctacttccggcggagcaaggccctccccttagaaacgccacttccctcc  
gtgaaaacggctggacaaggtgaacctagacgcatgcgcccgaagcgcgggggtgcgaggtgggtggacctcgttcc  
cgctcttctccaaagcgttacggcagctctcgggatttcccctctcggggaattattgaacgttcgagcggg  
aaatacctccggggtgtcATAGAAGACTACTCGGAGAGCGCTGCCTCTGGGTTGGCGGGCTGGCAGGCTGTAGCCG  
AG  
CGCGGGCAGGACTCGTCCCGGCAGGGTTCCAGAGCCATGGGAGCGGAAAGGAGGCTGCTGTGATTAAGGAGG  
CCTTTCG  
GCTGGCGCAGCAGCCGCACCAGAACCAGGCCAAGCTGGTGGTGGCGCTGAGCCGCACCTA

>NM\_006163-Human-180DBTSS:NM\_006163chr12-5297567852976378hchr12\_00155  
agtgattctctcagctcagctcccgagtagctgggactacagacatgtgccacccaccagcccagtaattttgta  
tttttagtagagacggggtttccatgttggccaggctggctcgaactctgacctcaggtgatccacctgccttggct  
cccaaagtgtgggattacaggcctgagccaccgcccgatgaaaccaatctataaactaagcttgcaataaccagca  
cagttctaacaagtgttactaagtcttactaagggtatattacctcagaagaggaagacttctgattgtatgggtt  
aaggtatggccaaatgacctgtgaggacacaggacagaggtccagtgtctccagagccattccttctgtcctctgc  
tgctgcaactgataaaccttattctggcccaggcaggggagcccaggccaggataggaggagagggcagagctgcta  
tcaaccaccagcctgggcccATATCTTGAGAGGAGGAGGGGCTGTCTGCTTGCCTCTTTCCACAACCTTGTCTTGGG  
GA  
TCCTCAAGCATATACTGTCATCATCTTGAAAGAAAAGGCTGAGAACGTA AAACTGAGGACAGAGGAGGAAA  
GCAGGGTG  
ACCCCTGATGTTGCCCTAGAAAATGGAAAACAAAACACAGCAAAACAGAAAAACAGAAGA

>NM\_006163-Human-181hchr12\_P020142chr12-5298088352981583hchr12\_00155  
gtgaaaggacacatcaagcagtcagttgccctctctccaaatagttcccctgcccgttcccagagcccaggttt  
tctgtaaataaggctataccctaaactcaactgcttagacagctgggaagctagacacctggtccttacctcagct  
gccttccacctgatagactcagtttccctgtccctaggagagccgtggggacacaaggcagcacaacctgtataaag  
tttaaaggtcacattcagtgacctcaggttggaaatcgtcaaatgcatgggagaaacgcagacctgggtggactcct  
gggctgaaaaggagggtgggagaggctggagccatgtgtcccccgctggccaggagcaaggtggggcggggtgtgg  
gcagaaaccacatcgggctcaagtttctctcttggccgaaagggcaggaggagaggagaccggggaaaggggagg  
gttgaggaaaggactgagaaCTCAGGCCGAGGGCTTCAGACGCTGGTGCCTGCTTGGGGCTCCTGTGCTCAGCTCA  
GC  
CTGAGCTTCCACACTCAGCGCTCAGCAATGGCCCCGGGGCGGGGCGGGTCCCTCGCAGATTCTCAAAGGTAGCC  
GGGATC  
CTCGTCCAGCAGTGTGCTCAGCTCAGGCTCAGCCTCCCAGAGACAACACCGGGAGCCTCATC

>NM\_004556-Human-182hchr6\_P020130chr6-4434560044346300hchr6\_00924  
aaggggctggggctgaggggtgggaggcaggctggggggccgggcccggggggggccggggccggggcggggtgtcacctt  
gaggccctcgcggcgcgctccgctcccgcgctcccgcgctcttctgtgagcagctggagccagcgcgccc

cccccttctgccagcgcagccgagccccgccccagcccccaactccgccttccaagcctacctaataaccacc  
cccgaaggggtaaagcaacagggactccccacaccttccccgctcccagcctgctcactgcacctccccgcgt  
cctatctgggagaatctgtgccgaacacctctccatctgttctcgtggactcgggtcccaggttcaaccaacagca  
ccccccacacacacacatctctggttcccccaagttcccagggcagaggagtgaggagaaattgattcttgaa  
ccctaggaagatccttactCCCAGTTTCGTGGTGAAGGGTTAAGGCAGAAGCTAGACTTCCAGAGGAATGGAATAGG  
GG  
GAAAGGGAAGAGATTGAAGCTAGATGTGGGAAAGGACTAACAGAGGGCAGAGGGGAGGGCATTGGAACCGGC  
CTTCACTG  
AACCATCTTTCTTCCCTAAAAGAACAGCTCCAGAGAAGCAGTGAAGTGTGTGCAATACCC

>NM\_004556-Human-183hchr6\_P020134chr6-4434104844341748hchr6\_00924  
gtcttactgtagtcccagctactcgaaggctgaggcaggagaatcgctgaaccagggagggtgaggtgag  
cagagatcaaccactgcactccagcctgggcaacagagcaagacttcgtctcaaaaaataaaaaataaaataaa  
atgaattaagaaatagaagtgaagaaggaaacagtcacatgcgtggaactaatgaatggagtgaaggaggaagggg  
gagtgatgaatgaatgaatgaatgagtgatgaatcaacgaaggagtgatcaaggccgggaaccaagactccaagc  
ctacgcagagcccgggaaggggattccggaggggcccggccttccggaagcggccggggggcggggagggggcg  
gggcatccgcgtgaggcaccctgttggtcggaggggcccgggagggagggagggaggggagggggcg  
acagtaaccgctgggtggacCTGGCCAGCGCTCCGAACCTTGTCTCGCTGCGCGCCGCCCTCGGAGCCCCACAGCC  
C  
GGGAAGGAGGCCGCCGCGGGCCGGCCGCTCTGCCAAGCGGACCCGCAACCCGAAAGCGGCGCGGGCGG  
AGCCTGG  
AGCCGGATCCTGCTCAGACCGGGCCCCGGCCGCCAGAGCCGCGGCATGTGCGAGGCGC

>NM\_002649-Human-184hchr7\_P009918chr7+106101457106102157hchr7\_00065  
taactgtactatttagtaattatgttttagatgtttaagaacaatgtccattctgagccattataatgtgtcatg  
cgctgtgctggatgagtggtttacactctttaaattttcaaaagtatacaaaagtagaacgaccaataagccccat  
atactgtcaccatattgaacaagtattacttttaactctcctctggggcattactactaaccagtttgagaga  
tgagaacaggctcagagattaagcagcccaatcaccagaaagtaagtggtggccaggactcaccggcccactcc  
aaagcccacgctctgaagggtgtagtgctccagtttaaatacttgctcctctgggtccctgtgacatgtacgcc  
cctatactctcttccctcatctcaccagaaaataaggggaaagtccttctgtgacaaatccctgtgtccctcc  
gctcccaggtcgcataaggcATGGAGCTGGAGAATAAAGCCCGTGGTGTGAGAGAGGACAACCTGCCGAAGGC  
GC  
CGGAGGATGAAGCCGCGCAGTGTGCGGCCAGCCTGTCTCCATGGAGCTCATCCCCATCGAGTTCGTGCTGCC  
CACCAG  
CCAGCGCAAATGCAAGAGCCCCGAAACGGCGCTGCTGCACGTGGCCGCGCCACGGCAACGT

>NM\_004288-Human-185DBTSS:NM\_004288chr2-158125909158126609hchr2\_00004  
gcagatataatgtctttgatgaacattaatgatctagggtatactcagggaaagtagtattacaaggactcgag  
agagaacattatgaccggcactgtaattctgcccattcaagaactgaatgtctcgtgtgacttctgact  
gcattgctaattgaagtagaagatggatgggaaacaatggtagcactggggacattttcttctctaaagaa  
aaaaatggcaaatgggtggtgtaactgccacagaacataaaagcgtaaagaattctggctgttgaggatgaaaa  
ataagttgattttcttaattgaaaaattagctccaggttctcaggagctaaagaaaaaagctttgagaaatg  
ggagtgaatagcaagataggggttgtaacaagtctcaaacacagaggtcacatgggctcttctgcttggact  
ttgattactgtcacagtGTACTTTTAGCTTCCCCATCCTGCAAGGCCACTCAACCATGTGCTAGCTGGAGTGATCT  
TTATTCACAATGTCTTTACAAAGGCTCCTGCAACACAGCAGCAATGGCAATTTGGCGGACTTCTGCGCTGGGC  
CAGCGTA  
TAGCTTTACTCCACACTCACCGCAGCCTTACGATGGACGATAATAGAAGGATTCAAAT

>NM\_002838-Human-186HUMLC01\_1chr1+195339324195340024hchr1\_00752  
ggggcaaaactgtaagctgtcgaagtgctttgcataagaatgggtttactgctaaaactgtcatattgctgag  
ttgaaatgccctaattgtaaatgatactgggtgcccacaaataaccagattagtagttttcattcattggccgtc  
agtaagtcaaatatgatactttactaagtcatttgcacacccattttgtatacttatgctgaatctgtttgtc



atctctaagtaagaaaattattgattatgtggggatttaatttaaaaaaatggtaatggatactgtaaaggagca  
ttatgttgatggttataaaacatcttccttgatgggaaaatcttttaaaggcttctaactgggtgaattacttgaat  
taaggagtgcattctactgacttagaacaactttttgactctgcaaaggacccttacagtatgttgg  
agaagtagtaaaaccgaatCTGACATCATCACCTAGCAGTTCATGCAGCTAGCAAGTGGTTTGTCTTAGGGTAACA  
GA  
GGAGGAAATTGTTCTCGTCTGATAAGACAACAGTGGAGAGTATGCATTTATTTATTTACTTTTACATTTTGG  
ATTCGTT  
TTTACAGAGAAAACTTCTACAGAGATAACAATTATTTTGGCTTTTCAGAAGGACGCATGC

>NM\_002838-Human-187HUMLC A01\_2chr1+195339330195340030hchr1\_00752  
aaactgtaagctgtctgaaagtgtttgcataagaaatgggtttactgctaaaactgtcatattgctgagtttgaa  
tgccctaatggtaaatgatactgggtgccaataaaccagattagtagtttttcattcattggccgtctcagtaag  
tcaaatattgatacttctactaagtcatttgcacacccatttgttatacttatgctgaatctgttgcacatct  
taagtaagaaaattattgattatgtggggatttaatttaaaaaaatggtaatggatactgtaaaggagcattatt  
ggatggttataaaacatcttccttgatgggaaaatcttttaaaggcttctaactgggtgaattactgaattaagga  
agtgcattgactgacttagaacaactttttgactctgcaaaggacccttacagtatgttggagaagt  
tagtaaaaccgaatctgacaTCATCACCTAGCAGTTCATGCAGCTAGCAAGTGGTTTGTCTTAGGGTAACAGAGGAG  
GA  
AATTGTTCTCGTCTGATAAGACAACAGTGGAGAGTATGCATTTATTTATTTACTTTTACATTTTGGATTTCG  
TTTTACA  
GAGAAAACTTCTACAGAGATAACAATTATTTTGGCTTTTCAGAAGGACGCATGCTGTTTTC

>NM\_002838-Human-188HUMLC A01\_3chr1+195339379195340079hchr1\_00752  
tgctaaaactgtcatattgctgagtttgatgccctaatggtaaatgatactgggtgccaataaaccagattagta  
gtttttcattcattggccgtctcagtaagtaaatattgatacttctactaagtcatttgcacacccatttgt  
tatacttatgctgaatctgttgcacatcttaagtaagaaaattattgattatgtggggatttaatttaaaaaaa  
tgtaatggatactgtaaaggagcattattggatggttataaaacatcttccttgatgggaaaatcttttaaaggctt  
tctaactgggtgaattactgaattaaggaagtgcattctactgacttagaacaactttttgactctgca  
aaggacccttacagtatgttggagaagttagtaaaaccgaatctgacatcatcacctagcagttcatgcagctagca  
agtgtttgtcttaggtaACAGAGGAGGAAATTGTTCTCGTCTGATAAGACAACAGTGGAGAGTATGCATTTATT  
TA  
TTACTTTTACATTTTGGATTTCGTTTTTACAGAGAAAACTTCTACAGAGATAACAATTATTTTGGCTTTTCAG  
AAGGACG  
CATGCTGTTTTCTTAGGGACACGGCTGACTTCCAGATATGACCATGTATTTGTGGCTTAAA

>NM\_002838-Human-189HUMLC A01\_4chr1+195339380195340080hchr1\_00752  
gctaaaactgtcatattgctgagtttgatgccctaatggtaaatgatactgggtgccaataaaccagattagtag  
tttttcattcattggccgtctcagtaagtaaatattgatacttctactaagtcatttgcacacccatttgtt  
atacttatgctgaatctgttgcacatcttaagtaagaaaattattgattatgtggggatttaatttaaaaaaaat  
ggtaatggatactgtaaaggagcattattggatggttataaaacatcttccttgatgggaaaatcttttaaaggctt  
ctaactgggtgaattactgaattaaggaagtgcattctactgacttagaacaactttttgactctgcaa  
agaggacccttacagtatgttggagaagttagtaaaaccgaatctgacatcatcacctagcagttcatgcagctagcaa  
gtgtttgtcttaggtaCAGAGGAGGAAATTGTTCTCGTCTGATAAGACAACAGTGGAGAGTATGCATTTATTT  
AT  
TTACTTTTACATTTTGGATTTCGTTTTTACAGAGAAAACTTCTACAGAGATAACAATTATTTTGGCTTTTCAGA  
AGGACGC  
ATGCTGTTTTCTTAGGGACACGGCTGACTTCCAGATATGACCATGTATTTGTGGCTTAAAC

>NM\_002838-Human-190HUMLC A01\_5chr1+195339381195340081hchr1\_00752  
ctaaaactgtcatattgctgagtttgatgccctaatggtaaatgatactgggtgccaataaaccagattagtagt  
tttttcattcattggccgtctcagtaagtaaatattgatacttctactaagtcatttgcacacccatttgtt  
tacttatgctgaatctgttgcacatcttaagtaagaaaattattgattatgtggggatttaatttaaaaaaaat

gtaatggatactgtaaaggagcattatttggatggttataaaacatcttcttgatgggaaaatcttttaaaggctttc  
taacttgggtgaattactgaattaaggaagtcaatgccattctactgacttagaacaactttttgacttctgcaaa  
gaggacccttacagtattttggagaagttagtaaaaccgaatctgacatcatcacctagcagttcatgcagctagcaag  
tggtttgttcttaggtaacAGAGGAGGAAATTGTTCTCTGTCTGATAAGACAACAGTGGAGAGTATGCATTTATTTAT  
T  
TACTTTTTACATTTTTGATTCGTTTTTACAGAGAAAACTTCTACAGAGATAACAATTATTTTTGCTTTTCAGAA  
GGACGCA  
TGCTGTTTTCTTAGGGACACGGCTGACTTCCAGATATGACCATGTATTTGTGGCTTAAACT

>NM\_182663-Human-191hchr1\_P024819chr1+203068250203068950hchr1\_01922  
gcccttgggtcaaaaagtaagacttcaagatggtgaccgagcgttaaaccagacaagggtccatgaaggcttgaag  
caagccttcacgggggaaagtccggggagaaaggagatctctcttgggtccatgagtgaacctcataccaggtcc  
acttagggcatttaggggaactggtatctccacagtaattactagagcagctctggggaacggagggttggttaaggaag  
aaaagctccccaacccttggggcgaggagcgttctcaatggagcccccaactcccctccacccccaccagctc  
tccaggaagaggaataccctaccggcgaggctgcgaaggaaggggaaatccaaccagagcgaagtcgcacgcggaca  
gctctgccagcccttggagcatccggcggtcaccacgggacaaagcgcggctgcgggagcgcgcggggcattccgg  
accgcgtcagctccgctcTAGAGGGGGCGGGCGGGCGGACAAGCCGGAGAGAGGAAGGGCCAAGGAGCACGGCCC  
TC  
CTGTCCGCACCATCAGCGGGAGAGTGGCGAGCGGACGCCTAGACGGAGGGGCCCTACTCAGACCCCATCGAGC  
CAGTTCC  
CAAGCTTTTCCCTCCGACCTGCTCCCTCCCGGGGCGCGTGAGGGTGCGGGTCCGGGGTGA

>NM\_182663-Human-192hchr1\_P024824chr1+203068773203069473hchr1\_01922  
aagccggagagaggaagggccaaggagcacggccctctgtcggcaccatcagcgggagagtggtgagcggacgcctga  
cggaggggcccactcagacccccatcgagccagttccaagctttccctccgacctgctccctccggggcgctgagg  
gtgcggggtcgggggtgaacctggtgttgggaaagtattggcaagggaaagaggcagggtgaaggcctagggcccc  
gcagaaatgcgcccctgagctgtactgtacagaggcctcctctcggaatcctgcagctgctccaggtgaagacgcc  
ccaaatccactcgcgcagacgtcgcctggcagcaccctacccccttggctcgcggttctcttgggtcgtcct  
tctgccactccgactctccccgccccgccccccagcaggctcgggtccttaaaggcgcgctggtgtggggcggc  
cccttctcgggggtggctCGGGAGTAGCGCAGTCGCCAAAGCCGCCGCTGCCAAAGCTGCCGCCACTAGCCGGGCAT  
G  
GCCATGGCGTCCCCGGCCATCGGGCAGCGCCGTACCCGCTACTATTGGACCCCCGAGCCGCCGCGCTATCTACA  
GAGCCT  
GAGCGGCCCCGAGCTACCGCCGCCGCCCCCGACCGGTCTCGCGCCTCTGTGTCCCGGC

>NM\_182663-Human-193hchr1\_P024833chr1+203118387203119087hchr1\_01922  
ccataactctgcatctgattgcatgttgggtgacctgagtttcttctggcattccaactaaaatattgctg  
tttcccaggcagggcagatattgatttttcttcttaaccattccgattgaccggctccccaccagcaatggg  
ggagggaggggggtgggggtgaggaagtggatgggggagaagggaggaggatggtgttgccttatagctagcactttt  
actccgtggaacctgagtcaccgggctgatgagaatgggctcttccagaagcaagtgcagatgaagaaagaacagag  
ggaatgtccccctcgggtccatcctggtcccttcttccctgcatcccttatatgacctgcagttccctgagtcactt  
gccaccggggcggggtggcaccaggcggcggggaggcggggaggggcgagtgacagccgagccggctttaggaacc  
ttgcagaggaagtggcttcaGAACTGCTTTACGCGAGGGCAGGAAAGCGCGGGAGGCGGGGAGGTGCGGAGATGG  
CG  
CTCTGCACGGCGGGGAGGGAGGGCGCTGGCGCCGGGACACGAAACCGCAGAGCCCGACGAGTCAGGGAGT  
GAGGCGC  
GAGCCGGGCGCCCCGGGGCTCTGCAGGCGCAGGCGGGCGGGGACAGGAGCAGGTTACCGG

>NM\_003005-Human-194hchr1\_P90227chr1-166330864166331564hchr1\_00312  
ttcctttcacatgacctatgtctatttaatacgtcatttgaactaccaataaaattccaagcgcagaaaactgt  
tagtggcttttccatttctctatttttttggctactaatttggcttcttccctcagaaggctccggaatagt  
aaacattcactgacatgtcataattactggaaaatgggactggaaaatcacattgtaattaattcaagcatgttttc

aaatgtactactttaattggagcttatatacataatccaaggaaaccttgtgtgtactgttccacattgctcagcc  
tgggatatccaggagtaattcaccttgcgcctcctccagaccatcttccatggaaggggtgaccttgcctcttggc  
aaccactatttctaagctccaacattactcttgattatcaacattctaactcatgggaagggctgtggtgagttct  
ggaatgtgaataggaagttgTTTTCTAAACAGCCTGACACTGAGGGGAGGCAGTGAGACTGTAAGCAGTCTGGGTTG  
GG  
CAGAAGGCAGAAAACCAGCAGAGTCACAGAGGAGATGGTGAGTTTATTTTTTTCTGCATGGGAAGTGGTTGA  
AGTGAGTT  
GGAGTGGTATGGAGTAAAGTCAGGCAGGTAAGGTTTCAGAAAAGTGAGGAACAGCGATAGC

>NM\_015359-Human-195hchr8\_P002239chr8+2228016822280868hchr8\_00684  
caacttgggttagtagggtctttagcgtctgatcattgtgggaagcgggtgcggcatcaagtctgaaaagtgaatata  
atatggttatttggaaactcgaccaggaaatttgggtcttggctggggaaatgacagaagaacaccatctaagg  
gcgcgtccccttctgaagtaccttccgaactggggagggagagaaaagcttttgggtgaaccagaagtggtaaaatc  
acattcaaatagagtgggtaggactctcctcaggggggtgtgggtggaggctaggcggtagagcttcccgcgccagg  
gagcaggtcttcacgggaggttccggaggcaggagcctgcgggtcctcgggagtcacggccgatgaaggatggga  
gcgggcgccgaccacagccaggccgcgaggcgcaggagggcgcaggctggccaggtccccagcctgccggccccagtg  
gcagccccggggcgagcgggGCGGGCCGGGGCGGGTCCGGCCGCTGACGCGCCGGGTATATAGCCGGGCATGCGCGC  
GG  
TGCCGGGGCCCGACGCAGTGAGGGGGGTCCGGCGCGGTGTCTACGCGGACGCACCGGCTAAGCTGCTTCTGCC  
GCCGCC  
GGCCGCTGGGACCTTGCGGTGAGGCTGCGCGGGGCCGAGGCCGCTCCGAGCGCCAGGT

>NM\_020675-Human-196hchr2\_P026018chr2-169572250169572950hchr2\_00969  
cttagtcttccacttctgaagatagtaacatagttctattaggcctcaaaaacattgtagagaagctggggga  
gtagaaaagaaggaatatttgaagcagtaaaaacctattctgaggaccatctgaatgttctgccactcacaattg  
aagtcaactttacaaggtgaatacaagaagaggatgtatttggcaaaagatacagtaaaaggtcaatatctgtatt  
gttcagaaaaccttatttgaagccgataaatgacttgcgtgggagccttccgggtgctattaatacttccgggtca  
cagcggagactctggctgtgttcagaaaagaactcagaatccagaatgcctgttccccatttccctcgagaatc  
caagggtgagttcaaccaatcctgtcaaggagacctgcgctatcggccaatcagaaggccagcctgcgctggaggcgg  
gtggcgggaagtgcactaggTTTGAAATCGGAAAGTTGGCGGGGCTGCGGGAGCTGAGCCTAGAGTCCGGCTGTTGG  
CTA  
GAGTGGGCGCGGATCTGGTGTGGGAAGGCGGGGACTCAGGCCTGCCTGCGAAGGTAAGGGAGTTGGGCGC  
CGAGCTG  
GGCTCCTTGGCCCCCTGTGCAATAAGGAAAAGTGAATTTGAGGGCGGGATGTGTGTAT

>NM\_003254-Human-197EP74400chrX+4719758947198289hchrX\_00779  
tatctccctcactgctgactactaattgttctctctgccaccctcaccagcatgtcagacatacaaaaacaagggga  
ttttgtgtgcttggcacacagtagatgacaataaatgtgaagggtgaactaattgggtttgagtcataggagct  
tgggggatgtgggtgattggatagattctggagactttaggggactgggcccgggggaaatgcggccttaagctctccg  
tgaggcggcttggaaaggaatagtagtgcagtgagggtgggggaggtggctggcccgggagggccagggagagggaga  
ggaggcgggtgggagaggaggaggtgtatctcttctcggccccttggcttctgactgatggtgggtggatg  
agtaatgcatccaggaagcctggaggcctgtggttccgcaccgctgccacccccccctagcgtggacattatct  
ctagcgtcagccctgccCATCGCCGAGATCCAGCGCCAGAGAGACACCAGAGGTAAGCAGGGCCCCGGGTGG  
CC  
CAGCAGGGACCGGAGCTGGGCTGCAGCTTGGGTGCTGGCCACCAGGCCCGTGCCTCCCGTCCAGATGCCTGT  
CTACTC  
AGCTTGGCCTGCGGGTACCAGGACCCTGGGCTAGTCTAGGGGAAGAGGGTTCGGAGGCTG

>NM\_003254-Human-198DBTSS:NM\_003254chrX+4719759147198291hchrX\_00779  
tctccctcactgctgactactaattgttctctctgccaccctcaccagcatgtcagacatacaaaaacaagggatt  
tttgtgtgcttggcacacagtagatgacaataaatgtgaagggtgaactaattgggtttgagtcataggagcttg  
gggatgtgggtgattggatagattctggagactttaggggactgggcccgggggaaatgcggccttaagctctccgctg

aggcggcttgaaggaatagtactgactgacgtggaggtgggggaggtggctggcccgggagggcccaggagagggagagg  
aggcgggtgggagaggaggaggtgtatctcttctcgtcgccccccttgcttctgactgatgggtggatgag  
taatcatccaggaagcctggaggcctgtggttccgcaccgctgccacccccccctagcgtggacattatctct  
agcgtcaggccctgccccATCGCCGCAGATCCAGCGCCAGAGAGACACCAGAGGTAAGCAGGGCCCCGGGTGGCC  
CA  
GCAGGGACCGGAGCTGGGCTGCAGCTTGGGTGCTGGCCACCAGGCCCGTGCCTCCCGTGCAGATGCCTGTCT  
ACTCAG  
CTTGGCCTGCGGGTACCAGGACCCTGGGCTAGTCTAGGGGGAAGAGGGTCGGAGGCTGGA

>NM\_003254-Human-199HSY09720\_1chrX+4719757947198279hchrX\_00779  
tcactgcctatctccctccactgctgacttaattgttctctctgccaccctcaccagcatgtcagacataca  
aaacaaggattttgtgtgcttggcacacagtagatgcacaataaatgtgaaggctgaactaattgggttgagtc  
ataggagcctgggggatgtgggtgattggatagattctggagactttaggggactgggcccgggggaaatgcggcctcta  
agctctccgctgaggcggcttgaaggaatagtactgactgacgtggaggtgggggaggtggctggcccgggagggcccagg  
gagagggagaggagcgggtgggagaggaggaggtgtatctcttctcgtcgccccccttgcttctgactgatgg  
tgggtggatgagtaatgcatccaggaagcctggaggcctgtggttccgcaccgctgccacccccccctagcgtgga  
cattatctctagcgtcaGCCCTGCCGCATCGCCGCAGATCCAGCGCCAGAGAGACACCAGAGGTAAGCAGGGC  
C  
CGGGGTGGCCAGCAGGGACCGGAGCTGGGCTGCAGCTTGGGTGCTGGCCACCAGGCCCGTGCCTCCCGTGC  
AGATGC  
CTGTCTACTCAGCTTGGCCTGCGGGTACCAGGACCCTGGGCTAGTCTAGGGGGAAGAGGG

>NM\_003254-Human-200HUMTIMP1G\_1chrX+4719758447198284hchrX\_00779  
tgcctatctccctccactgctgacttaattgttctctctgccaccctcaccagcatgtcagacatacaaaa  
aggattttgtgtgcttggcacacagtagatgcacaataaatgtgaaggctgaactaattgggttgagtc  
gagcttgggggatgtgggtgattggatagattctggagactttaggggactgggcccgggggaaatgcggcctctaagct  
tccgctgaggcggcttgaaggaatagtactgactgacgtggaggtgggggaggtggctggcccgggagggcccaggagag  
ggagaggaggcgggtgggagaggaggaggtgtatctcttctcgtcgccccccttgcttctgactgatgggtgg  
ggatgagtaatgcatccaggaagcctggaggcctgtggttccgcaccgctgccacccccccctagcgtggacatt  
atctctagcgtcaggcccTGCCGCCATCGCCGCAGATCCAGCGCCAGAGAGACACCAGAGGTAAGCAGGGCCCCGG  
G  
TGGCCAGCAGGGACCGGAGCTGGGCTGCAGCTTGGGTGCTGGCCACCAGGCCCGTGCCTCCCGTGCAGATG  
CCTGTC  
TACTCAGCTTGGCCTGCGGGTACCAGGACCCTGGGCTAGTCTAGGGGGAAGAGGGTCGGA

>NM\_003332-Human-201DBTSS:NM\_003332chr19-4109083741091537hchr19\_01318  
ggaggccaaggtgggtgagcactgaggtcaggagttgagaccagctggccaacatggtgaaaccctgctctactaa  
aaaaaaaaaatacaaaaaattagccgggcatggtggcaggcgcctataatccagctacttgggaggtgag  
gcaggagaatcactgaaccgggagggagaggttgagtgagaccgagaccgtccattgactcaaggtgaccagcca  
ggaagaggcagagctggttcaatcagccaggaaggtcatgactgaccctctgttaaaacgatgtctgaccctg  
actggggacggaggtgaagttgtgcttcacgtacccttgccttcacgtctagttgctggggcctgtggcatggccc  
ctgggtgctggcctgattcttctgggtttgttctgctctctctccctgctctctctctctctctctgcccacc  
cgcctcagacttctctctcACTTGCTGGACGCTGCGCCACATCCCACCGGCCCTTACACTGTGGTGTCCAGCAGCATC  
CGGCTTCATGGGGGACTTGAACCTGCAGCAGGCTCCTGCTCCTGCTCCTGCTGCTGCTGTAAGTGGTGAGT  
TAGGGG  
CTTCCGTGGCTGCCTCCCGGGTCCCTGGGCTCAGCTTGGGGCAGGGCAGGGAGTGGGGTG

>NM\_016373-Human-202AF212843\_2chr16+7669055176691251hchr16\_00764  
ttcatatgcaaaacaaggttgaatcagcacgaatgctgcaagcctggaaggttggatcacgacttccagag  
acccaaggcaaggagagacagaagcccaggacaacagcatgggcgcccgttttagtcgggcgccccttttggtcagg  
cgccacctggactacattccatattcaattgccgggctctgcaggattggccagaacaacgcggaagtattacggg  
tcgccagcaacgggcggagtcctggcccgaactggatgcgacgccccttccctgcccggggaggtgacaaggtc

cgctctatctctagcgcctcggagcgcctcctccggttctgctctagcccggcggcagcgcgatctcttaggcactttca  
ccgccttctctccaggccctgccctttgacgcggcgcgataattgaggagactggattcagcttcgtggtcgg  
cggagcggccctggagggcGCAGTGCGCAGGCGTGAGCGGTGCGGCCCCGACGCGCGGGTCTCGTTTGGAGCGGG  
AG  
TGAGTTCCTGAGCGAGTGGACCCGGCAGCGGGCGATAGGGGGGCCAGGTGCCTCCACAGTCAGCCATGGCAGC  
GCTGCGC  
TACGCGGGGCTGGACGACACGGACAGTGAGGACGAGCTGCCTCCGGGCTGGGAGGAGAGA

>NM\_016373-Human-203hchr16\_P012362chr16+7714406177144761hchr16\_00764  
ttctgcatctctgttagttcttctcctcctaagaaaaagcagatttaagtaactatcattgttcatttaactact  
attctttattccttcttcattcatttcttctccttctcctctctctctgttctctgttttaacaggtttattc  
ttatttggtatggttaaggccaagatgaggaatgactgctattgcaaagatggttgttactcacagatccatggggac  
tccacatgccacagggagtacctgggaagccccagggtgggcaggaggcagagggagagggggagaactgtcaagag  
tttgagctggaagctattatcctcagcaactaacacaggaacagaaaacaaataaccgatggtgtcactgttaagt  
ggagctgaacaatgagaacacatggacacagggagggaaacaacacacactggggctgtgaggagtgggggtggggag  
ggagagcatcaggaagaataGCTAATGGATGTTGGGCTTAATACCTAGGCGATGGGTTGATAGGTGCAGCAAACCAC  
CAT  
GGCACAGGTTTACCTATGTAACAAACCTGCACATCCTGCACATGTACCCTGGAACCTTAAATTTTTTTAAAAAA  
TGTTTTT  
ATTGTGATTTTACAGGAAAGAAGGGGCCAGGCAGGGTAAGCAGGCTTAGGATTGGCTGG

>NM\_016373-Human-204hchr16\_P012364chr16+7722899577229695hchr16\_00764  
actgacatcattcccagatcaaaagataaaagaaggaagggctggagacgttgtttcctgtatgctccttgatgaa  
gggctcagagctaagcgggagtaggtgcttaagccctccattgaaaggagctttaaacccttgggtggcagctaag  
agtgtcaaaatggagggatgtgtaggggacctaggcctgggtaacattgtccaggccaggcctattgtgtgtgtg  
gtcctccatttccagccttgggaacgcagagggggacctctgtaattggtaccagcatccttctcagggctcgtc  
cttctctgagttgggggaaggggtctcatggtttcttaccaggtagaccagaatcactttcaactgtctcacctg  
tctgtgagctgtttgagttctcctgggaagcttctcactcatccacttctctgggttctccgtaccgctttccc  
caatcaagtaagctcttcTCTTAGTTATTCTAATAACTGCCAATATCAGGCACTACCCTCAACACTGTTTCCCATG  
G  
CAATTATTTTACATGACAGTTTAAAAACAGGAATGCTCGATTTGTATTCCCATTTTGCAGACAAGCCAACGA  
AGGCTTG  
GAGGGGTTGAATGGCCCAAGTTTCCTAAGTGGCCAGGGCAGAGTCAGGATCTGAACCCA

>NM\_207408-Human-205hchr5\_P90044chr5+125994812125995512hchr5\_00348  
aggcatgagccactacactggccaaatTTTTTattttttagtagaccggaattactatgttcccaggctgtctc  
aaattcctgggctcaagtgatcctcctccacatcctccaaagtgttaggattacagggatgagccactgtccaggcc  
agaagggggattTTTTTaaagcctgaaaatagctctgagctggacactTTTTTTTTgatttagagtctcactctgt  
caccaggttgagtgagtgaggcagctcctggctcactgcaaccttgcctcctgggttcaagtgattcctcctgctg  
gcctcctgagtagctgggattacaggcaccaccacacactgtgagctggacactcttaactgctactgtaactgccg  
agagttactatgaagttagcaaaacattgttacatcagagcagcgttgcataataactagtagtgagttagtagaag  
tttagatgagattccatccATTGCTGTCAGGAATGGCTTCAGGAAAGATACTTGTCTACTTTGCCTAAACTCACTA  
A  
CAACTGCTCTGATGAGAGTCTCTATAAATCTGCTAATAAGTAAGGATTTATGGGATTCTGGGGTTTTTTTGT  
GCTTGTT  
TTGCAACCTGGGAGCCACAAAGATACGGTCAATAACTTTGTGTTCCCCTTTGGCATCTAT

>NM\_017436-Human-206DBTSS:NM\_017436chr22-4144158941442289hchr22\_00059  
tggacgggtcagcccggcctccaaagaggaagggactgggtgctacctcagcgggtgggtggggagctgggtgggaatt  
tctactgattcctcattcgaagtgtattattgggacccattgagtgccaggctcttctcagggctagtagaggt  
tccatttctcagtggtgggactgggtcatcagctgagtgagaggatgggctcagcactcaagaagtcaccaatg  
gtttcatttttgcagctcttgtgtcccagaggagtaagaactaaaagcaccaggactgtgacatgctggaacatggc

atgttccaaagagaataaaatacagttttatgatacacgaattgtgtgtgatacattccaatttctcacattgaacaaat  
taccaatagcaatatgtgtgaagatggggcgaggtgagagtgaggaggagtagagaaaggacggggcgcggttaagg  
atacagcaaataactggaatTCCGCAAACACTGGGGTGATGCAGGCAATGCCCTTAGCACGGTCCCGGCAGGAGGCGG  
TG  
GGATCAGGCCGACCCGGGTCCAGGGGTGACAGCGTCCCTTCTCCACTGCAGAATATCGAGGTACTCAACCCTC  
TGAACC  
TCAGTTTTCTCATCAGTTCAATGGGGAAAACGGGATGGTAACCCGTAATACTGGCGGCGC

>NM\_017436-Human-207hchr22\_P010574chr22-4141415441414854hchr22\_00059  
gtgtcacatggcgaagccatcacttctgacagtccttacgcagaccagactctggcctggcctgtgatggttacacacc  
atgggtggcactggcctggccttgggtgagctcacaggtgtgtcgcagagagtgaaggaccctgctcagacccagtc  
ccatggcccactgtgtcccatttcgtaggtgagcagccagcaggtggggttcaagccttggcccctgtggcccagga  
gccccatggccttgaagccagcctggctctggctgatgttcacaggaagcgttttccttgggatcgggaatgccaacg  
gcctccctgatggcgggtgctcatctctgacagaccagcgggtcctgctggaagcctctgctgatctggggatacca  
tgtccaagccccgacctctgctgcggtgctccggggcgccccaaaggcagcgggtctgcaccctgttcatcatcggc  
ttcaagttcacgttttctgCTCCATCATGATCTACTGGCACGTTGTGGGAGAGCCCAAGGAGAAAAGGGCAGCTCTATA  
A  
CCTGCCAGCAGAGATCCCCTGCCCCACCTTGACACCCCCACCCACCCCTCCCACGGCCCCACTCCAGGCAACAT  
CTTCT  
TCCTGGAGACTTCAGACCGGACCAACCCCAACTTCTGTTCATGTGCTCGGTGGAGTCGG

>NM\_152792-Human-208DBTSS:NM\_152792chr2-7010085470101554hchr2\_00331  
gtaaaacacgctcaacgaggagtggtgcccctttagggacaggcagaaggctccatggagtgaccttgaatggggac  
ataaaagtggatcccttaacagcccctgcacagccccaaagtcaggcctccagccttggactcacagatgtcctctgta  
gacgactggatgtcctccgtgtaccctttaccctgcagcagggggcacagagccagagccctccaggtcctcaccac  
tggcatcaccaacatagtggaacatttccctctcagaatgaaaagggagtgaaattcccgtgatcttccacaaatgac  
cagcttggggagtgaggaggaagtgtcagtgctggggaagggccctggaacgattcctggaatggagaggggtg  
gatagggaggagacaatgctcatggagtgagtgatggggcctaccagagttgcttggccaccctctgcctctgaatca  
ggggtgatcaatgaagggaaaATTACTGCAGCAGTTGAGTCCATGTAAGATGATTGTGCACGTGTGTGTGTGTGTG  
TGT  
GTGTGTGTGTGCTCACTCACTTAAAAAAGACCATTTCTGTGCATTCTTTATGCTGGAACCCCTCCTCTGCCTC  
CCTCTC  
CAGGAAATCCCATAGGATCCCATACCTGCTTTAGAATGTGTGTGAGACACTTCCCAGTGC

>NM\_152792-Human-209hchr2\_P033508chr2-7010298870103688hchr2\_00331  
gcaaaggatccaggtgaatataagaagtgaacaatttcaaaaaaacagcagaaaagaacagcaaaagggaaaccagga  
gctgagaagaattgggtggtgagctcacagcccagaatctcagtgagggggcgtggagggtagggagccccactcc  
ttcctgtttattgtcctgcttctcctgcaggggtcagtcgggtgtgcttctcaggggtacaccagagacgcta  
gggtgataatgaggggtgcccggcccaatacctatactgtcaataattaacctgatttctaggttctgggaggaggt  
agtggcacctggcctgcctggctggttagctcatggggcacctctggcgtagccattcaaggtctctgtgtgctcc  
aggctgttctagggatgggtacctccaaggcataagggaaactgagaactgacctttaccatgttctgatcttagcc  
agagacagactcccagactcGGCCAGAGGCTGATGCCAACTCCTTCCAGCTCTCACGGTAACCATGAGGCCCTGCCT  
GT  
TTCTGTTGTGGAGGTCCAGAGGGAAGTGTATGGACAGACACAGCCCGAAGGGCCATCTGCCTCAAGCCACAG  
CAGCACA  
GAATTCTAAAGATTGTGGGGAAGGATGGGGCCAAGGTGGGCTTGGGCTCCTTGGTGAGAG

>NM\_001172-Human-210DBTSS:NM\_001172chr14+6715588967156589hchr14\_00643  
aaatttactgatcccagtcgaagagtttctggcctttagccttgagatagaacgaagcaggtgatcctggctt  
tgactaggcagggccagaccagggcccagccagccatccgtagagtcagcatcagccgggctgaagattggtgt  
cggctcctgcgttccgcaagttcaggaacctggcatggccggccgctcccgcgaagggacacacctgttggtcaccg  
cgcttactggccagaccggatattggccttctggcgtcagcggcagggcatgtcctggccggagagcacaggcca

gagtggggtgacgtcatcgaaggcacgtcccagccttcagagcggtgggcggggctgcgaagaaggtgtccgggggc  
tggttgaggcgcgggcgggcccaatgtggcggtgacgtcacggggcgggcgacgtggcggggtaggtaaagagc  
agcggcgggcggtggcgctcACTCCCGCTTCCAACCGCGGGAGCCTCTGCCTTGGAGATTCTCAGTGCTGCGGATC  
AT  
GTCCCTAAGGGGACGCTCTCGGTCTCTCCAGACGCGAGTGCATTCCATCCTGAAGAAATCCGTCCACTCCG  
TGGCTG  
TGATAGGAGCCCCGTTCTCACAAAGGGCAGGTGAGAACTGGCACCTGGAACCGCCGGGCAG

>NM\_174891-Human-211chr14\_P008526chr14+104522888104523588chr14\_00057  
gcgacagagcgagactcgtctcaaaaaaaaaaagaaaaaaaaaaaaaagaagaaccactcggcggggaactgagcacg  
gacagaaagctcgagcggccggcgccagggctcggccagtggtggaagcccgatcccaccgcagcggaggcgccgg  
ggcagggaggcggggtccggggcgggctcgaacggcgggggcgggcgctggcctcggccggatgctgtgacgccac  
ggcgcagggacggcgaagcggagctggcgacgccggttccaggcaacggggcgggcgagggcagggaggaacggctggt  
gcaggttctctcgcctggtcccgcggccccgccagggcgggaccaaggtgggtgctggggactctcgggagccgtg  
ggccaggccttagccggccacctcgggcccctgtccagggcggcgttccagggctgctctcggggcggtgagag  
ggactctcgggagggccccggGGCGCCGCACCCACTCCTTCCACTTGGGACTCCCAGGGCGCCCGGCTCTCGCTCCTC  
T  
GGCCAGCGTGGGCCTCCCAGGCCCCCTCGCGGTCTCTCCAGAGCAGGAGCCCCACCTTGGGCCGCCCTCTCA  
CACCTG  
CCGTGGGTCTGGTACGCGCCTCTGTGTGGACTCCGCGCCCGCCTGCGTGGGAGGAAGCC

>NM\_004334-Human-212DBTSS:NM\_004334chr4+1538045415381154chr4\_00311  
ttcaacctcggcttcttggggctccctccccgtggacagcggtaagattagcctgggcccagtgactggtcctg  
tcctgggtgatgtccaagctcactcttttttaattttattttatttttttttagacagagtctcactctgt  
cgcccagggtgagtgagtgagtgcaatcactgctcgcctcgcagcctgatccccctggggtcaagcctcctcacatctca  
cctcgcaggtagctgagactacagatgcgaccaccaggaccagtaagttttgtatttttttagagaggaggtttct  
cacctgtatgtactcaggtttgtctcgaactcctatactcaagcgcctcggccttaggctctcaagtgctgggat  
tacaggcatgagcccgcgccccccccagctcagctttaaattgtctggaacgggaaacggcaaacagcgagatat  
ccgagcgagagtgccccctGCATCAGTTTGGCGAACCCTTGGTAGAAGGAGAGAAGGGGAGTGGAGGAAGCACG  
GGA  
CTGGAGGGACCAAAGTTCCCCGATGGCGGCCAGGGGTGCGCGGCATCGCGGCTGCTCCAGCTGCTGCTGCAGC  
TTCTGC  
TTTACTGTTGCTGCTGGCGGCGGGCGGGGCGCGCGCGGTGGCGGGGAGGGCACCA

>NM\_001276-Human-213EP73456chr1-199887187199887887chr1\_01273  
cagttccacctggccaggggctggagtgaatgctgaagatgcaaaaggtagaggctccagaaaagccaggaaattgct  
ggcaagaaggccagtggtggggtgacaggagtgagggaaggtgggaaatgctgagtcacatctccagaagcccc  
catcatcacctagtggtcttctgctggcaggtgctcctgaagacctgacccaaagtttcaaaactctcggtttct  
caacctccttggaatccatagctactccccgctcactgcccagcctcgtgattccttattgacacatagctcag  
ttccataaaagggtggtttgcccgtcggggagtgagtgaggacaggtatataaaggaagtacaggcctggggaaga  
ggcctgtctaggtagctggcaccaggagccgtgggcaagggaagaggccacacctgcccctgctgctgagccagaa  
tgggtgtgaaggctctcaAACAGGTATCTGGGCTAGCCAAGGTTAATCCATCAGAGTTGTGGGTTTTAGGCCAG  
CA  
GCCCCAGAGCCATCTGCCTGCTGGGTGAGGACTAAGGGAGTGGGCAGAGGGGAGGAGAAGCAGAGCCAGG  
GGAGGGA  
CTGAGGCTGCAACCAGGAGGTGGGGGTGGGGGAGGTGGGTCTCAGTTGCTTGGGGGAGGG

>NM\_001276-Human-214DBTSS:NM\_001276chr1-199887288199887988chr1\_01273  
gggggagggtaggaaggtaggtcaagcagggcaatgctgagcctgggaagaaaacaacagcctgttagggcactgtg  
cttacgtaactaaattgtcccagttccacctggccaggggctggagtgaatgctgaagatgcaaaaggtagaggctgc  
cagaaaagccaggaaattgctggcaagaaaggccagtggtggggtgacaggagtgagggaaggtgggaaatgctgctga  
gtcacatctccagaagcccccatcatcacctagtggtccttctgctggcaggtgctcctgaagacctgacccaaagt

tttcaaaactctgcggtttctcaaccctcctctgtaatccatagctactccccgcctccacttgccagcctctgattc  
cttcattgacacatagctcagttccataaaagggtggtttgccgcgtcggggagtgaggtagggacaggtatataaagg  
aagtacagggcctggggaagAGGCCCTGTCTAGGTAGCTGGCACCAGGAGCCGTGGGCAAGGGAAGAGGCCACACCC  
TGC  
CCTGCTCTGCTGCAGCCAGAATGGGTGTGAAGGCGTCTCAAACAGGTATCTGGGCTAGCCAAGGTTAATCCAT  
CAGAGTT  
GTGGGTTTTTCAGGCCAGACAGCCCGCAGAGCCATCTGCCTGCTGGGTGAGGGACTAAGG

>NM\_001276-Human-215HSY08374\_1chr1-199887334199888034hchr1\_01273  
cccgaggctcttgcccttaccagcctgaagacagaaagtgtgagggggaggtaggaaggtaggtcaagcagggcaa  
tgctgagcctgggaagaaaacaacagcctgttttagggcactgtggcttacgtaactaaattgtcccagttccacctg  
gccaggggctggagtgaaatgctgaagatgcaaaggtagaggctgccagaaaagccaggaaattgctggcaagaaaggcc  
agtgtggggtgcaggagtgaggaggaaggctgggaaatgctggctgagtcacatctccagaagcccccatcatcaccta  
gtggctcttctgctggcaggtgcctcatgaagacctgacccaaagtttcaaaactctgcggtttctcaaccctcctctg  
gtaatccatagctactccccgcctccacttgccagcctctgattcctcattgacacatagctcagttccataaaagg  
gctggtttgccgcgtcggggAGTGGAGTGGGACAGGTATATAAAGGAAGTACAGGGCCTGGGGAAGAGGCCCTGTCTA  
GG  
TAGCTGGCACCAGGAGCCGTGGGCAAGGGAAGAGGCCACACCCTGCCCTGCTCTGCTGCAGCCAGAATGGGTG  
TGAAGGC  
GTCTCAAACAGGTATCTGGGCTAGCCAAGGTTAATCCATCAGAGTTGTGGGTTTTTCAGGC

>NM\_001276-Human-216HSY08374\_2chr1-199887290199887990hchr1\_01273  
gagggggaggtaggaaggttaggtcaagcagggcaatgctgagcctgggaagaaaacaacagcctgttttagggcactg  
ggcttacgtaactaaattgtcccagttccacctggccaggggctggagtgaaatgctgaagatgcaaaggtagaggct  
gccagaaaagccaggaaattgctggcaagaaaggccagtggtggggtgcaggagtgagggaaggctgggaaatgctggct  
gagtcacatctccagaagcccccatcatcacctagtgctcttctgctggcaggtgcctcatgaagacctgacccaaa  
gttttcaaaactctgcggtttctcaaccctcctctgtaatccatagctactccccgcctccacttgccagcctctgat  
tccttcattgacacatagctcagttccataaaagggtggtttgccgcgtcggggagtgaggtagggacaggtatataaa  
ggaagtacagggcctggggaAGAGGCCCTGTCTAGGTAGCTGGCACCAGGAGCCGTGGGCAAGGGAAGAGGCCACAC  
CCT  
GCCCTGCTCTGCTGCAGCCAGAATGGGTGTGAAGGCGTCTCAAACAGGTATCTGGGCTAGCCAAGGTTAATCC  
ATCAGAG  
TTGTGGGTTTTTCAGGCCAGACAGCCCGCAGAGCCATCTGCCTGCTGGGTGAGGGACTAA

>NM\_001276-Human-217hchr1\_P033982chr1-199883436199884136hchr1\_01273  
ccatactgatccaccataccagcatgactgttccagcagctctcagctctgctgggggcagcctaagatctcc  
agttaccaggggcagaaggagagtctaaacaattgttcacaataaccagcagcaatcactttaactttgggatttcatgc  
accagctagaacaaagcacagaccgaaaggcaaatgtctccaaagtcatctgtggccaataggggtcaccactgtcc  
gatgctcctccaggacaggagtaattgagtctgatgggtgtgcatgggtttggggagaagattagtcagtttttag  
gaaaaggatgggtgacttgaggatgggacctgatgagccactttactcacttaggcccaggcaggttggggag  
tacagcaaatgggtgctgagagacctagtcgacctgatgagctacctctcatgccacttgggacctttctctcac  
ctgctgtctccatctaggAAATGAAGGCCGAATTTATAAAGGAAGCCAGCCAGGGAAGGAGCAGCTCCTGCTCAG  
CG  
CAGCACTGTCTGCGGGGAAGGTCACCATTGACAGCAGCTATGACATTGCCAAGATATCCAGTGAGTCTCCTG  
CCCCAGG  
CAGCCTCCCCAGAACCTCTGCCAACACTCCTGTTTTCCCCGCCACCCAGCCCTAGCACT

>NM\_001878-Human-218EP74092chr1-153488231153488931hchr1\_01328  
gagtacggagtggtccactggatccagttcagggttcaatggagctagggccagctacggctcaagatctggggtccgc  
ctgcccgggtggggtgccaggtgtccggccaaggagttgaatgcaccagctcaggttggggatgggtggggaacaggcc  
agactgaggaactcgggtgggggacagccatacacgacctgagcatctgcccgcagctagctccccgcctctg  
cggagagcgcgattcaagtctggtcttgcgtccgcttccccatccactactagcgcaggagaaggctatctcggtccc



cagagaagcctggaccacacgcggttagatccagaggttggtggcgggggcgagggccccaggtggggggggcg  
gagcgggaggcggggcacttcaatctgggcagggcggttccgtacagggataaaagctgtccgcgggagcccag  
gccagcttggggtgtcccTGGACTTGTCTTGGTTCCAGAACCTGACGACCCGGCGACGGCGACGTCTCTTTTACTA  
A

AAGACAGTGTCCAGTGTCCAGCCTAGGAGTCTACGGGGACCGCCTCCCGCGCCGCCACCATGCCAACTTCTC  
TGGCAA

CTGGAAAATCATCCGATCGGAAAACCTTCGAGGAATTGCTCAAAGTGTGGGTAAGGAAAT

>NM\_001878-Human-219DBTSS:NM\_001878chr1-153488248153488948hchr1\_01328

ctccaagcccctctctgagtacggagtggtccactggatccaggttcagggttcaatggagctagggccagctacggct  
caagatctggggtccgctgcgggtggggtcggcaggtgtccggcaccagggattgaatgcaccgagtcaggttgggga  
tgggtggggaacaggcgagacgtgaggaactgggtgggggacaccatacacgacccctgagcatctgcgccgcagct  
agctccccgcctctgcggagagcgcgattcaagtgtggttgcgtccgcttccccacttactagcgcaggag  
aaggctatctcggctcccagagaagcctggaccacacgcggttagatccagaggttggtggcgggggcgagggcccc  
ccaggtggggggggcgagcgggaggcggggcacttcaatctgggcagggcggttccgtacagggataaaagctg  
tccgcgggagcccaggccAGCTTTGGGGTTGTCCCTGGACTTGTCTTGGTTCCAGAACCTGACGACCCGGCGACGG  
CG

ACGTCTCTTTTACTAAAAGACAGTGTCCAGTGTCCAGCCTAGGAGTCTACGGGGACCGCCTCCCGCGCCGCC  
ACCATG

CCAACTTCTCTGGCAACTGGAAAATCATCCGATCGGAAAACCTTCGAGGAATTGCTCAA

>NM\_001878-Human-220hchr1\_P037654chr1-153490990153491690hchr1\_01328

ccagccacttcttttagccacaccaccatggaacaaagtcccagaatgttctctcctaagtctctcagcttgtttc  
ctctactccacccctacctatcccactctgccccccagcttttctcatcaacttgcaccctcccctactgagtc  
tccagattcctggggggccccaagagggttatgaccaagctcctgcaaagggtcacccctgggcagatctgtagcagat  
taggtcataataaaaggccagaggcactgggaaattccttctcttattgatcccagcgggaaattaaagccagttgt  
tgtgactgagtggtgatgaaggctgcagctcctcccattgctggttccagggtcctagcccctgctccttgcctcta  
ggcatctccatctccttggttagtcccctccccaggcccctcactctctatctcctacccctccactccccagct  
ccccttccctagcatctcccCTAAGAACCCTCCGTGCCTGCTGCTCCCTGGGGTAACAGGGCTGCTAGAGGCTGAGACC  
T

CGGCCTCAGCTATTCAGCACCCCTGCTTAGACCCCTACCCACCTCCCTCAGCCAGGGTTAGGGTGCTGGGGCTG  
GAGCTG

GAGCTCAGGCCAGAGCTGCCAAACCGCAAATGCTCACATCTGGAAAGAATTCCTCTCCC

>NM\_001878-Human-221hchr1\_P037657chr1-153488848153489548hchr1\_01328

ctgttctccgtctccctgccatctccactggggtctgcccactcccactcgggtctctgcaggaagccgtgcctctc  
cccacctctttgatctccggttcaagccgctctcaaggaggggaggtcgctccttccgcccgtttacagctcag  
gatggtgacacctgagacctgtcgccttctccccggcaccatctcccgcctatctaggtggtggcgagctcgc  
cagggtccgcgctctgccccgctcctccttccccactgagaccccctcggggtctcgggagtgaagcgacag  
agaaagcgttttaataaaagaccttgcgtcaagtattggctgtgacctctgcccctccagcctcgcgcccctgggctctg  
cttaaccttcaatgtccgcccagcgattaaggggagcagctcgcctggcgactactccagagctcccaggcattacg  
tgagcccgaagcagggtggaGGGGTGGGGGACCGTGCCGCCCCCGCCAGCCTCTCCGAGTTGTTCCAGCAGGGGGC  
GC

CGTTGCCTCACTTAGATCCCTAACCCCGGAACCCCGCAGCTCCCAAGCCCCTCTCTGAGTACGGAGTGGTCCC  
ACTGGA

TCCAGTTCAGGGTTCAATGGAGCTAGGGCCAGCTACGGCTCAAGATCTGGGGTCCGCCTG

>NM\_000760-Human-222hchr1\_P047706chr1-3661761136618311hchr1\_02236

gcaaagaaaattatttagtttagaagaatcatgaatacagacaataaaagacataaaatgtagtctatttactcaa  
ttacaaaatattcagttgagcagaaccattgtgggtaaacattcctaatttttagtgaacataaaagaccccgtgcctc  
accaagacgtcctcctgtctgccccagaattcctgtttctccatctgctggtctatgggcaatgcacagaatacgt  
atgaagaggggagcagtgagtattgggttacacaattccttgaacctggaacacacccttctgagtactgtgaagatgt

ggcccccaaggctagagctgaaaagaggcttagggccgggtgagccttcagccagggcctgcctccaagtgatgctccc  
ccagggcagggggcataaggatggcaccagccaggtgggagcctgggcccctgccagcctcaaagctttgagctcagga  
aatccgaggcaggggagggGGACATCGTTGCCACATTCCCCAGCCCTTTAAGACCCCCAAGGCAGGAAGGCTGCCCC  
GG  
CCTCACCAGCTTCCCTCACAGGCTCCTTCTGGGAGGAAGGGGCTGCCTGTGCCCTCGAAGGCGCAAGGGAGGG  
CAGGAG  
GGAGGCTCGGAAGGTGTTGCAATCCCCAGCCCCGGGCTGTGAGGCTGAGCCATTAA

>NM\_138455-Human-223DBTSS:NM\_138455chr8+104452453104453153hchr8\_00537  
ggcaggagaatggcgtgaaccgggaggcggagcttgacgtgagccttagatggcgcactgcactccagcctgggagaca  
gagcgagactctgtctcaaaaacaacaacaacaacaacaataagactcgcgacccatgcatagattgacgacc  
cttgaaggtggctcgtgtaccaggttaagccacgtgtctctaaaatgttcatttaggcggcgtgtgttacctgcggga  
atccccgacctgcggctcctgaccacgggcccaccccagaccctgcagggcggctctccacgagggtctgcgcagcc  
ccgagggggtcctgacagggcagcactgcagtagggggggcgggcccggctctcggctcccccacgcccgggctcg  
gggtggggctcggggcctattacgggatggaagctccgggtgtcgcggggcgggaggaattaaggaggagagaggc  
gcgcgggtgaaagcgattGATGCAGCCTGCGGCGGCTCGGAGCGCGGCGAGCCAGACGCTGACCACGTTCTCT  
CC  
TCGGTCTCTCCGCTCCAGCTCCGCGCTGCCGCGCAGCCGGGAGCCATGCGACCCAGGGCCCCGCGCCTCCC  
CGCAG  
CGGCTCCGCGGCTCCTGCTGCTCCTGCTGCTGCAGCTGCCGCGCCGTGAGCGCCTCT

>NM\_000896-Human-224AB002455S1\_1chr19+1561220515612905hchr19\_00245  
cctggaggcaagactgaaactccatccagcagcaggggtagaggttcttccaggttgctgattcagcatcca  
gaagtggtagacggtgtcctaccggcccagggtagagaggagcagggagatgatctggaacaaggcttgccctggcct  
ggctcgttgacacctgaaactctcaagttcatgctttatctgccacacactcagtaggtgctttaaagagcaggtgtc  
acacagtggaaactctatctgacccctctcggcttactctccaccttatgtgggaggtgctgagacctgaggatccagtg  
cctgtgctgtgcacctgagctggttctctgcatccagctggtctcccacaccaggttttgccagctgcccagaca  
tgggagcggcaccagctgtggggattggctggcccagcccagcccagcctagcctcccacagccttccctacatcagg  
ggccaggggaaaaaacctccCAGAAGAAGGGGAGAGGAGGTTGTGTGGGACAAGGTGCTCCTGACAGAAGGTGCCAG  
GGT  
GGGGTGGTGGCCTGGGGCATCCTAGCCTGTGATGGAGATGGGCACTGGGCAAGGGATTGGGCGCACACATA  
GGGAGC  
CCCAGCCTTCCCACATTCTCCATTGCTGCCAAGGCCAGGCAGCTCCTGGTTGCTGGCT

>NM\_004820-Human-225AF127089\_1chr8-6587370265874402hchr8\_00714  
tcgggacttcaaaggcttacggcctaggtctttgtattccgtgtctctggcagcgcctctgcacacagcagcctgaa  
ccaaaactgtgagcaaataggatgtaaggggtgaaggaggtgggcgcaaacgggttcgaggtcgcgactccgcccg  
ttctgccagcccaaccgctgggtcgtacctaagagatcgcgggtgtcagagcgcagcgggaccttcaaacgca  
tcttagggacaagcagagctcctcccagggcgcgggtaagaagtgaggaacccaaggggctcccgtccaacta  
agaagcgaatccccactccaggcctcagggtggttcttgggaaatcctaactcttcccttcaacccttctt  
ggccttcttctcccgggaggatcaagggcgctgtttccagaagctccgggtcggaaacgggtgggggaacggggcg  
gtacgcgtgggtggagataGGCGGGGAGGGGCGAGTCCACGAACTTTTGTCATTCAGCCTGGGAGACCACGGTGACA  
TT  
CCTGTCTGCGCTGCGGGCAGGCCAGCCTTCCGGCCCTGGACTAGGGGGCGCCGCCGAGAGAAGCCGCCGAGG  
CTGCAG  
AGTCGCCGACCGCGCTGTTGCGAGGCAGACCCGGGCTGCCACCGCGCCTAGCGCGCG

>NM\_198449-Human-226hchr5\_P022855chr5-4977279949773499hchr5\_01065  
ttacatagatctactctcagtagcttttcttctgagctcaggtgctcctcagaagctgtaggcttaacaacaa  
aaataaagtaaatcagacaggtatggggccttgggactctaaaccttcatccggagaaaatcagttaagccttcaga  
gactagaagagagaatgtgtgtgattggtaggcaagcaagaaagattaacacaagttgtctggcagctggataaac  
ttacacctgcgcaaaaataagcctccctcgaagaaagcccaagatgtccggggtcgggagagaaaagtgttctca

tctgtcccatcaaagcaaattagtgaacctgcctcaggtgaagtgcaaagccagtctgttaggcagagtttcgacctct  
ccccacgagattggctagacatcacctgcccaagctctctcccgacctgtagagccgagagggcgaggccggagagggc  
tgcagccgggaagtagcaccGCCACCGCACATCCGGGAACGCCAGCAGCCGGCTGAGGGCTGCATAACTGATGGAGGG  
CC  
GGGCGCGTAAGAGCGTCTCGGGGGAGTGGGGCAAGGCGGCCGGGCCCTCCCATTCCGCCTTTTCTTCAGCGT  
CCTACC  
CGCGGCACTGGCTGCGAGCGCCGGGCCACCTGCGAGTGTGCGCAGGGACTCTGGACACCC

>NM\_005269-Human-227AF026306\_1chr12+5613970056140400hchr12\_00795  
cttctccccctgccccgcaatatttctcaatctggtgtcggggctcttggggccagccgatccagaaatccaagc  
cgggatttagtactaccaacagcagcgtgttcagccggggcgggggggcgtaagcagtagaggtccctcaaggc  
agggggaggatcctgggggtcctgggggtgcaataagcccggcacccttctcttgcctccagctaccccgctcatcct  
ccagaacggcaagagggagggaaatagaagggaggtgaggggagcgggaagagcggcgccgagcggctggagag  
agaaaaagttttgcaaaaagggaaaaaaaagtttgccttctcggggtgtccggcttgcggccggcgggctgggc  
cggcgaggggctgggggcccaggtgggggggtgggggtggcatcgaggctgcctgcccctctccggccccct  
ccccaccgacacccccagCCCAGACTCCAGCCCTGGACCGCGCATCCCGAGCCCAGCGCCCAGACAGAGGTGAGAA  
GG  
GGGGCAGGCGGGGACCACCTGGGAGCAGTGGGGGAGGGGGCCTGAGGGGATGCTCAGCTTCTTAGGGACTC  
ATCCCAG  
ACCCGGGACATAGAGGCAAAATAGGGGTGGGAGAGCCTGGGGTGTAGACATTAGAACTCC

>NM\_005269-Human-228hchr12\_P005368chr12+5614533956146039hchr12\_00795  
agctcagggtgggtgggtggtgattttgtagggaagggtgaaggaaggacaaggataaagttttagtactagaaa  
agtaaagaggtggtggtgctggggttactccttgcagttgagtcagacgcttccaaatgggatcccacctttgccccat  
cccattaccagtgtagtctgaggaggaagtccttccaaaccaggaggtccagctcctgggtgggggacttaggg  
caggaagacctggcttggtttctcttcttctgcttactccacctcataccgtcaccttccccctggggaagctg  
aagtctgagctggacatgctggttggcaagtccgggaggaaccccttgaaggtgatgtccagccccactccacag  
catacaggaaggggatgggagggagctttaccttgggacctgagcaaaactaaagctgtcacccaagtgacctgaga  
ttgctctcttgccttaggaTCCCTGTTGGGGATGCTGGATGGGCGGAGGACCTCGAGAGAGAGGAGAAGCGTGAGC  
C  
TGAATCTGTGTATGAACTGACTGCCGTTGGGATGGCTGCAGCCAGGAATTTGACTCCCAAGAGCAGCTGGTG  
CACGTGA  
GCCCCAGGGGTAACAGGAATGGCTAGCCAGAACCTTTAGGAGATTCTGAGTGGGACATG

>NM\_152629-Human-229hchr9\_P027173chr9-42898344290534hchr9\_00265  
cttcttagtgctcacctatccagtttcaagctgtcatgtcatccgatccgatatttcaagcaaccctttgccc  
tttctactgttattctctccgtactactaccgatttttgggtgttgtttttttatgacctgacatcaaat  
cctgtctaaactaactacttttcatgtttaaataagtcagtttaacaataaggccaggaagaaggcgaagtgtctcc  
ctgctgttacctgttctggagttctcgacttctggcgacggggagtggtgtgtgtgtgtgtgtgtgtgtgtgtg  
tgtgtgaatgctcaagaggagacacaagctcggcctcgaattggccagcctagtaccggcgagccccccccactc  
tccccctccccctccggcgtcacactcaggaagcagctggctacaggccggcctcggcgccgacacacatccacac  
tcctgccccgctgcttccTCCCTCCCTCTTCCCTTCCCTCTCCCTGCAGCCGCGTCCACACTGCGCCCGCCGGC  
AGCCCAGAGCGCGCGCGCACGGGCACCGCGCGGAGTGCCGCGGCCACTGCCCTCCCGGGACCCCTGTACG  
CCGTCC  
GCGCCGTCCAGGGTCACACCGGCGACGGAACCCGCGGCGAGCAATTAGCCAGCATCCCGG

>NM\_152629-Human-230hchr9\_P027190chr9-41086104109310hchr9\_00265  
ttctgcaaagcctgtcataacatgctgcacatagtaggtgctcaacaatacttatttgggtggctttgacaggtatcag  
taattttccaggtctctatccttttccccatattgaaaaagttatttaaaataaagcaaggactatttactc  
aagattaagattattataacaatagatctttgttaccattttcagtgagcattaggtttattgttctcttggtg  
aatgttatttaccggaactggaagccttgattttatcttagcccaagaatgtgtgttagcacagaatgtaattagg  
ggaaacttaagggtgtcaatgagctgttcttttagcttcaagcaatccgtatcctgctaaaatgtttatctttt

ttttctcctttctggctgctgtccaggtcccttatttcgctgagctttggcgctccacgaccttgagctgacgga  
aagtcagtcggcctcaagcaTGAAGCAGGAGTGGTCCCAGGGCTACAGGGCCCTCCCTTCGCTCTCCAACCACGGCTCT  
C  
AGAATGGCCTTGATCTAGGGGATCTCCTTAGCCTTCCCTCCCGGGACATCCATGTCCAGCAATAGTGTCTCTAAC  
TCATTA  
CCATCCTACCTTTTTGGCACGGAAAAGTAGCCACTCTCCTTACCCTAGTCTCGGCACTCA

>NM\_002112-Human-231EP47007chr15-4834501748345717hchr15\_00004  
tgcaacaacagatagatgtgtaataagaaaaatccattgtgtcaatgataactctgctgttctgggcaacagggg  
catcactattagctgttctccctccctactgctgataaggaaacaggggcaggaataataactaataattgtgcta  
cttttctgcataccctggccttattctggctactgagctgggagctgtctgaggctggagctctattgtctgaatc  
caggggcagaaagaactgagggctctttacggcatccacctggaggctgctgcaggctgggtgtaagtgcactgc  
ttaattagaagcgcctttatcctggctctctgaccagctcaaagttgtgctgctgttttacaaggactgggaaa  
gaaaggtggaattaataaacctggaggaaggactttgaagggcggagctaaggtcaaagaaagaacctttaaata  
agggccacactggctgccGGGAGTGCGCAGGACTGGCAAGAGGGAAGCCGGGCTGCTCCACGCCTTTCACGCCTT  
CA  
CCTCCTGCGTGTCCATCTGTGAGAAGGAGCCAGAGCCCAAGGGAGATGATGGAGCCTGAGGAGTACAGAGAGA  
GAGGTGA  
GCAACGGGCATCCCTGGCCCTCTTCCCTGCTGCTACTCCTGCAGGAACGGCTGCTGGTGG

>NM\_002112-Human-232HUMLHDC\_1chr15-4834501848345718hchr15\_00004  
ttgcaacaacagatagatgtgtaataagaaaaatccattgtgtcaatgataactctgctgttctgggcaacaggg  
gcatcactattagctgttctccctccctactgctgataaggaaacaggggcaggaataataactaataattgtgct  
acttttctgcataccctggccttattctggctactgagctgggagctgtctgaggctggagctctattgtctgaat  
ccaggggcagaaagaactgagggctctttacggcatccacctggaggctgctgcaggctgggtgtaagtgcactg  
cttaattagaagcgcctttatcctggctctctgaccagctcaaagttgtgctgctgttttacaaggactgggaa  
agaaaggtggaattaataaacctggaggaaggactttgaagggcggagctaaggtcaaagaaagaacctttaaata  
aagggccacactggctgccAGGAGTGCGCAGGACTGGCAAGAGGGAAGCCGGGCTGCTCCACGCCTTTCACGCCT  
CC  
ACCTCCTGCGTGTCCATCTGTGAGAAGGAGCCAGAGCCCAAGGGAGATGATGGAGCCTGAGGAGTACAGAGAG  
AGAGGTG  
AGCAACGGGCATCCCTGGCCCTCTTCCCTGCTGCTACTCCTGCAGGAACGGCTGCTGGTGG

>NM\_003856-Human-233hchr2\_P90038chr2+102411734102412434hchr2\_00001  
ttgggatggggtggagtcacattctggaacctagacagagaatttctaagttccagaaagtgtgcttactctgcatttc  
ctctccccaccttctttgaaactcctggcaccatgctccaaggctggcggagcttctgagtggtgctgcc  
aatgaggagtcaaggaatatctggaaggcagcctccaggtccccgatgtcaagaccatttagaactgaaagtgtccaa  
tatcggggtacaggcaataagcattagtattaatcagcctgagaagttgattctaaataggaggaaatgattcaatta  
tttctctcaaggattactcaatgttgttttatgttaaatatttattgtcaacatcaagaattcttagtcatgat  
gcaccagcattttgaacaagtcagatgtggccacaaatcaattcaggatgggaggagtgtctcccctttaaata  
gaagagagtgagtagtctatGAGGAGGGACCTACAAAGACTGGAAACTATTCTTAGCTCCGCTACTGACTCCAAGTTC  
AT  
CCCCTCTGTCTTTCAGTTTTGGGTAAGCATCAATTACTTATCTAAAAATTTGTAATAAGAAAAGTCTTCATAATT  
CATGATT  
GTGTTTATCTTTATGTTAGTAAATTTCTATGTTGGTTCTATTCTTCCCCTTATATTTTAA

>NM\_003856-Human-234hchr2\_P90039chr2+102385979102386679hchr2\_00001  
gtcaagtttcaaaaacattgccaacgaggcatcagttacaaaactgctgcagagtgagctgatattgcccactgca  
ctccagctgggtgacacagtgaggcttgcctcaaaaaaaaaaaaaaaaaaaaaaagaagaacaccaataagcaact  
tgctgcagaaatgggtactctgttctagaaatgtgactatagggaggttacaactaccaactcgcgtaagggaatga  
gtgacctgccactacatggtgttagggaggtttgctgagaaagtcactcatgaagaaggcaaaatagtaagcaaa  
aatgtaactatctatagataaggtaaaaattggaatagaacttcattaagatcttcaaatagggaatgtggtg

aaaactgcagttaacatttgtaacagtgtgatcatcgggttcagcttatcagtaacctggtcctctcttaactgat  
aaagaaaatgggaggttttAAAGAGAGGCTGGCTGTTGTATTTAGTAAAGCTATAAAGCTGTAAGAGAAATTGGCT  
TTC  
TGAGTTGTGAAACTGTGGGCAGAAAGTTGAGGAAGAAAGAACTCAAGTACAACCCAATGAGGGTAAGTGGCT  
TTGGGGTA  
TTTTTCAAAAATACTTTTATCTCAAAGGGAACAAAATTTTCACATACGAATTTAGGTCAT

>NM\_000206-Human-235EP73808chrX-7011424670114946hchrX\_00002  
aagggtgggtattctggttggattagatcagaggaaagacagctgtatatgtcccacaggagccaagacgggtatttc  
catcctccaaaacagtagagctttgacagagatttaagggtgaccaagtcaaggaagaggcatggcatagaacgggtgat  
gtcgggggtgggggttcagaactccattatagaaggtaatgatttagaggagaaggtggttgagaatgggtctagtggt  
agtgaacagatccttccaggatctaggtgggctgaggattttgagctctgacactattgtatatccagctttagttt  
ctgtttaccaccttacagcagcacctaatctcctagaggacttagcccgtgtcacacagcacatattgccacacctct  
gtaaagccctggttataaggtctttccaccggaagctatgacagaggaaacgtgtgggtggggaggggtagtggggtga  
gggaccaggttctgacacAGACAGACTACACCCAGGGAATGAAGAGCAAGCGCCATGTTGAAGCCATCATTACCAT  
TC  
ACATCCCTCTTATTCTGCAGCTGCCCTGCTGGGAGTGGGGCTGAACACGACAATTCTGACGCCAATGGGA  
ATGAAGA  
CACACAGCTGGTGGGAAATCTGGGACTGGAGGGGGCTGGTGAGAAGGGTGGCTGTGGGA

>NM\_000206-Human-236HUMIL2RG01\_2chrX-7011424770114947hchrX\_00002  
taagggtgggtattctggttggattagatcagaggaaagacagctgtatatgtcccacaggagccaagacgggtatttc  
ccatcctccaaaacagtagagctttgacagagatttaagggtgaccaagtcaaggaagaggcatggcatagaacgggtga  
tgtcgggggtgggggttcagaactccattatagaaggtaatgatttagaggagaaggtggttgagaatgggtctagtggt  
tagtgaacagatccttccaggatctaggtgggctgaggattttgagctctgacactattgtatatccagctttagtt  
tctgtttaccaccttacagcagcacctaatctcctagaggacttagcccgtgtcacacagcacatattgccacacctct  
tgtaaagccctggttataaggtctttccaccggaagctatgacagaggaaacgtgtgggtggggaggggtagtggggtg  
agggaccaggttctgacaCAGACAGACTACACCCAGGGAATGAAGAGCAAGCGCCATGTTGAAGCCATCATTACCA  
TT  
CACATCCCTCTTATTCTGCAGCTGCCCTGCTGGGAGTGGGGCTGAACACGACAATTCTGACGCCAATGGGA  
ATGAAG  
ACACCACAGCTGGTGGGAAATCTGGGACTGGAGGGGGCTGGTGAGAAGGGTGGCTGTGGG

>NM\_000206-Human-237HUMIL2RGA\_1chrX-7011422470114924hchrX\_00002  
attagatcagaggaaagacagctgtatatgtcccacaggagccaagacgggtattttccatcctccaaaacagtagagc  
tttgacagagatttaagggtgaccaagtcaaggaagaggcatggcatagaacgggtgatgtcgggggtgggggttcagaac  
ttccattatagaaggtaatgatttagaggagaaggtggttgagaatgggtctagtggttagtgaacagatccttccagga  
tctaggtgggctgaggattttgagctctgacactattgtatatccagctttagtttctgtttaccaccttacagcagc  
acctaatctcctagaggacttagcccgtgtcacacagcacatattgccacacctctgtaaagccctggttataaggt  
tctttccaccggaagctatgacagaggaaacgtgtgggtggggaggggtagtggttagggaccaggttctgacacag  
acagactacaccaggaatGAAGAGCAAGCGCCATGTTGAAGCCATCATTACCATTCACATCCCTCTTATTCTGCAG  
GC  
TGCCCCTGCTGGGAGTGGGGCTGAACACGACAATTCTGACGCCAATGGGAATGAAGACACCACAGCTGGTGG  
GAAATCT  
GGGACTGGAGGGGGCTGGTGAGAAGGGTGGCTGTGGGAAGGGGCCGTACAGAGATCTGGT

>NM\_001557-Human-238EP57007chr2+218815779218816479hchr2\_00009  
gtcttgggggaaagaaagcaattgttttttttttttaaatgattgtctgggttagtaaccagaggtcattg  
ggaaccttggcgaagtatttcagtgagcagtaggaaggaagccagtgctgtcttgttgagcagcagagggggag  
gtgaggaagtggagagagcagctgtgtggctgaagggtgctaggacagagggagcatgataaagccataagtaagatg  
ggtagaagggaaagaccagacagaggggagagaaagcaggtcctcaaggaccagagagggcagtggtcccacagtc  
ggtgctgggattcaacagaaacagaaggaggacgttctactctgaccccgaagaaggaagaaactgctgctgcagat

tcagacaagtccgttggcggggctgggatgcctgcatcttctgttaaaaaaggaagtgcaggttcaaacattcaga  
gacagaagtgatagacaaATCTCCACCTTCAGACTGGTAGGCTCCTCCAGAAGCCATCAGACAGGAAGATGTGAA  
AAT  
CCCCAGCACTCATCCCAGAATCACTAAGTGGCACCTGTCCTGGGCCAAAGTCCCAGGACAGACCTCATTGTTCC  
TCTGTG  
GGAATACCTCCCAGGAGGGCATCCTGGATTTCCCCTTGCAACCCAGGTCAGAAGTTTC

>NM\_001557-Human-239AH005384S1\_1chr2+218815074218815774hchr2\_00009  
ctctgccagcacagcaattgtctctgcaataggaactcccaccagtgaagatctgggactcaagccctgccattc  
agattctttgtccacagggattcccttgatgtgatgttctcccctctctaggaatgggactcctggaagccag  
actacagtgtcttctgggtctagccaccagtgggctaccagactctgggctgggtctaggaatgtctgcaagggat  
ccagtgggttacctgtctcaagactcccagcagtgaataaccagcaccatctctgacagaagtgggagggagtgatg  
aaactctgcaagattccttggttagatagacttagagtattgactttctcaaatgctggttataattatagtgactt  
atcacgtggacagacgaggactctggttagccaggggtgtaagcagtggatagctgagaatagcagccgtttt  
ctccttctgggtacagtgcTATTCTGCCTAGAGGTGAGTTTTTGCCTGTCTCACAGAGTAGGCTGCAGCCTGCCACTT  
C  
TTTCAAAAGTTCTGTGGATTCTTTCAGCTTTCCTGTTTTCAGTTCCTGCATTCGTTTCTGGAGAAAAAAAATTA  
TAGTGTG  
AATCTCTACACGCTATTCTGTCTTCCAGATGGGAGAGGCATGCTAATGCTGCCTCCAAT

>NM\_001557-Human-240AH005384S1\_2chr2+218815003218815703hchr2\_00009  
tcccttctcaagaccctcacaataccagaggctgctgctattgggttagaggtgcaacttccccactctgccca  
gcacagcaattgtctctgcaataggaactcccaccagtgaagatctgggactcaagccctgccattcagattcttt  
tgtccacagggattcccttgatgtgatgttctcccctctctaggaatgggactcctggaagccagactacagt  
ctcttctgggtctagccaccagtgggctaccagactctgggctgggtctaggaatgtctgcaagggatccagtgggt  
ttacctgtctcaagactcccagcagtgaataaccagcaccatctctgacagaagtgggaggggagtgatgcaactctg  
aagattccttggttagatagacttagagtattgactttctcaaatgctggttataattatagtgacttatcacgtgg  
acagacgaggactctggtTAGCCAGGGTGTGTAAGCAGTGGTGATAGCTGAGAATATGCAGCCGTTTTCTCCTTC  
CT  
GGGTACAGTGCTATTCTGCCTAGAGGTGAGTTTTTGCCTGTCTCACAGAGTAGGCTGCAGCCTGCCACTTCTT  
TCAAAAG  
TTCTGTGGATTCTTTCAGCTTTCCTGTTTTCAGTTCCTGCATTCGTTTCTGGAGAAAAAAA

>NM\_001557-Human-241AH005384S1\_3chr2+218815824218816524hchr2\_00009  
tggatttctgggttagtaaccagaggtcattgggaaccttggcgaagttatttcagtgagcagtaggaaggaagc  
cagttgacgtgtcttctgtagcagcagaggggaggtgaggaagtggagagagcagctgtggtggctgaaggggtctagg  
acagagggagcatgataaagccataagtaagatgtgtagaagggaaagagccaggacagaggggagagaagcaggatc  
ctcaaggaccagagaggcagtggtccacagtcaggtgcggggattcaacagaaacagaaggaggacgcttctcact  
tgaccccgaaagaaggaagaaactgctgaggtcagacaagtccgttggcggggctgggatgctgcatcttctt  
gttaaaaaaggaagtgcaggttcaaacattcagagacagaaggtggatagacaaatctccacctcagactgtaggct  
cctccagaagccatcagacaGGAAGATGTGAAAATCCCCAGCACTCATCCCAGAATCACTAAGTGGCACCTGTCCTGG  
GC  
CAAAGTCCCAGGACAGACCTCATTTCTCTGTGGGAATACCTCCCAGGAGGGCATCCTGGATTTCCCCTT  
GCAACC  
CAGGTCAGAAGTTTCATCGTCAAGGTTGTTTCATCTTTTTTTTCTGTCTAACAGCTCTG

>NM\_001557-Human-242HUMIL8R\_1chr2+218815751218816451hchr2\_00009  
ggcatgctaagtctgctccaatctgttcttgggggaaagaaagcaattgttttttttttttaattgatt  
gctgggttagtaaccagaggtcattgggaaccttggcgaagttatttcagtgagcagtaggaaggaagccagttgc  
agtgtcttctgtagcagcagaggggaggtgaggaagtggagagagcagctgtggtggctgaaggggtctaggacagagg  
gagcatgataaagccataagtaagatgtgtagaagggaaagagccaggacagaggggagagaagcaggatcctcaagg  
accagagaggcagtggtcccacagtcaggtgcggggattcaacagaaacagaaggaggacgcttctcactctgacccc

ggaaagaaggaagaaactgcgtgcgagttcagacaagtcggtggcggggctgggatgcctgcattcttctgttaaaa  
aaggaagtcaggttcaaaaCATTCAGAGACAGAAGGTGGATAGACAAATCTCCACCTTCAGACTGGTAGGCTCTCC  
AG  
AAGCCATCAGACAGGAAGATGTGAAAATCCCAGCACTCATCCCAGAATCACTAAGTGGCACCTGTCCTGGGC  
CAAAGTC  
CCAGGACAGACCTCATTGTTCTCTGTGGGAATACCTCCCCAGGAGGGCATCCTGGATTT

>NM\_005733-Human-243DBTSS:NM\_005733chr5+137542256137542956hchr5\_00125  
ctggaattctgggaaatagtgtaccggcgttggttcgcggtgcctcctgggaaatgctgttttcccttaagcaaaagc  
aagcacctaaccagttaccctgtgactcctgttaagattggtctaaggaaggacaggagtggctgctgaagcctc  
aagattcctttaggtccttaggtaagaaatgtctaaggtcaaggaaaaaggttaagttggaagaatcccaggcaaat  
aagtgcgaatccacgacagttgtaaacccggacccacattagaactcagaggtcaagcagaagcgaacgactggaattcc  
agtgcggcccggccttcttacgcggttgtagctgcaggcttccctatctgattggccgaacgaacgcagcgcgt  
aatttaaaatattgtatctgtaacaaagctgcacctggtggcgagttgtctctgctggctgcgaaagtcagcttcgg  
cgactaggtgtgagtaagccAGTATCCCAGGAGGAGCAAGTGGCACGTCTTCGGGTGAGTGTGCGGCTGTGCTGGAGC  
CC  
GGGTACCAGCTCTTGCCCGCGGGAATAGGCTTTAAGAAATCGGAGCTGCAGCCATCTGTTTTTCTCTTAAT  
GCTGCAT  
CTCTGTTCTCACGGTGGTCCTTGGGGTGAGGTTAGAGAAGGAGCCGAGGGATCCTGACAC

>NM\_009588-Human-244AB088106\_1chr6-3165798131658681hchr6\_00695  
aacgggaggaggtcagcccagtatgggaaatcagttcttctcaggaaccagacatccatccctcaagattccagtcctt  
gtcctagtccggccttgacctcagagacgggatcagcttctcctcagcacctaccctgagggtatagaagaatgcaaa  
ccacattgaaacctggagatctgtgttctcattcagctctgctgactggcttctgcaagctaccttccctccctggg  
cctcagtttctctctgctgagccagaagatgtctaaagaccccttggttccacctgagagcctgtctccctaacct  
caacttctcccagttcagagaaccaggcatccagctgccccaccagctctgggtaaaccaggaagctgggtgaggg  
gagcaggggtgtgcggaagtcccagccaggtgtgcaaggtctacagggaggggtgggcccctcctgaggtatgaaagc  
cccctgctctggctctggttCAGTCTCAATGGGGGCACTGGGGCTGGAGGGCAGGGGTGGGAGGCTCCAGGGGAGGGGT  
T  
CCCTCCTGCTAGCTGTGGCAGGAGCCACTTCTCTGGTGACCTTGTTGCTGGCGGTGCCTATCACTGTCCTGGCT  
GTGCTG  
GCCTTAGTGCCCCAGGATCAGGGAGGACTGGTGAGTGGCTGCAACAGGCCCTGGTGGAGA

>NM\_009588-Human-245BA000025\_35chr6-3166236331663063hchr6\_00695  
gataacattaggtcaggatcaggactggcctggaggtcaggaactctagtcctttaggcgaaatgatcagg  
ggctggtgacttgcctcaagttcctcatctgtgaagtgaggggcccctctgtataatcgttcccaggtggggagcctcc  
cttatgtccaacctgagctgggactttcattcctcactgtaatcccagaacatagggtatcatggtgcccttg  
ccaagtaaagaccgagattcaagctggactttactaggtcaccatcccagaaggtggagctggggtttaaaggcca  
gctctgccaactccagagcccagccttctctgcccctgggctgaccacgtggttggaggggactttcagcctgg  
atggttctaggtgctgtaaggggatgatggaggggaaggagcctgggctgggtgggtgaggcactggggggaagaag  
ggaggtgatcagcacacCCAGCAGGTGGGCTGCTCCCTGAGCCGACAGCAGCGGGAGTGTGGGGGCCCCCTT  
GG  
CTGGTGTGGAGAGCTGCTTCCCACAGGCAGATGCTGCTAGGGCTGAAGTGGGGCATGGAGGAGTATCTGGGGC  
CCCATAA  
CTCCCCCTCAGGCACTTCTCCCTCCAACCACTGGTTCTGTTTGGGGTGAAGAGGGG

>NM\_009588-Human-246HSY14768\_3chr6-3165798331658683hchr6\_00695  
ggaacgggaggaggtcagcccagtatgggaaatcagttcttctcaggaaccagacatccatccctcaagattccagtc  
ttgctcctagtcggccttgacctcagagacgggatcagcttctcctcagcacctaccctgagggtatagaagaatgca  
aacacattgaaacctggagatctgttctcattcagctctgctgactggcttctgcaagctaccttccctcctg  
ggcctcagtttctctctgctgagccagaagatgtctaaagaccccttggttccacctgagagcctgtctccctaac  
ctcaacttctcccagttcagagaaccaggcatccagctgccccaccagctctgggtaaaccaggaagctgggtgag

gggagcaggggtgtcggaaagtcccagccaggtgtgcaggtctacagggaggggtgggcccgtccctgaggtatgaaa  
gccccctgctctgctctggTTCAGTCTCAATGGGGCACTGGGGCTGGAGGGCAGGGGTGGGAGGCTCCAGGGGAGG  
GG  
TTCCCTCCTGCTAGCTGTGGCAGGAGCCACTTCTCTGGTGACCTTGTGCTGGCGGTGCCTATCACTGTCCTGG  
CTGTGC  
TGGCCTTAGTGCCCCAGGATCAGGGAGGACTGGTGAGTGGCTGCAACAGGCCCTGGTGGA

>NM\_009588-Human-247hchr6\_P023538chr6-3165668831657388hchr6\_00695  
agggtttcagaagctgccagaggaggaccagaaacagatctcagccccgggctcccagctcccacctcataggttaagg  
acctcaagacctgaataagagtgtaaataatccgaaggttccagttctgctcggcagagctctcggctccatgattc  
cagtgctcggtttcccaccgcttcacgacctttgtcgtctgtgcccactcttacgctcgtccccgagtgtagtttct  
tcttccctcgggtgaagcaaaagccggcctggagggtccccactacagcgttctgcaccccaatccgtgttccctcggc  
ccccaaactgcactcatcccagaaacagaccatccctcctccccggcccggctcggctcccaggggctaaaagccg  
ccacttcccagaagtccaagcctttaggatcgattcccagaagcgcgctcggcccgtgtctccgagggcgtccgctg  
aaggggcaggggctaggctgGAGACGACGAAGGAACAGGCGTTTCTGACGAGCGGGACGCAGTTCTCGGACGCCGA  
GGG  
GCTGGCGCTCCCGCAGGACGGCCTCTATTACCTCTACTGTCTCGTCGGCTACCGGGGCCGGCGCCCCCTGGCG  
GCGGGG  
ACCCCAGGGCCGCTCGGTCACGCTGCGCAGCTCTCTGTACCGGGCGGGGGCGCCTACG

>NM\_000428-Human-248DBTSS:NM\_000428chr14-7414885974149559hchr14\_00704  
tcagacttggtggcgcagctgtaatcccagctactagggaggctgaggcaggggaatcgctgaacccgggagggcgga  
ggttgcggggagctgagatcgaccattgactccagcctgggcaacaagagcgaaactccgtctcaaaaaaagaaaga  
aagaaagaaagaaaagaaaaagaaaaagaggaccttctaccggcagccatcaccgcccagggctcagggc  
tgacctcagccagtggaaggggattgagatccagagcgaagggcggcgccagggcattgagccacggagcgccag  
ggcccagctccgcccagggggcgcgcccgggacctcctcgcgtccgcccgcgcccgcgcccgcgcccgcgcccgcg  
ccggccggccctgcggaggggcccccagcggccagggcgcaagcggagggggcgccgcccctgttccctacgcccggc  
tcggcggccctcccggttctTTCAGACCTGCAAGGCTGCAGCCTGGGTCCCCGATCCAAAGACGGTCCCTGAGGCGA  
G  
GGGCGGAGAAACGATTCCGGGGCAGGTCTGCAGTTCGAACTTGCCCAGAGCAGGAGAAAGGCGGCCAGTGTCC  
CGGTCTG  
GGCAGGCGCCATCTGCCCGACCAGCGCCTGGGTCAGCCCCGCGCCGCCCCCTGCTCCGCA

>NM\_000428-Human-249hchr14\_P013909chr14-7415306474153764hchr14\_00704  
cctctgtacggcctgcaccttcaaaactggaggctgaggctgcgagtgctgggggtcccagctgcccagtgctggag  
cagaacatccaagccatgagcggctcccgtctggaaggtgggggcccagtcacacttctcagcattctgcctc  
tgattaaccaggaatgtgttattgttctgagcaggggaacaagctctcctggggagaggaattcagggctggaggtcc  
agttactccaagcaagaaaaatcctggaattcttcaggagctgggtctcagcaagggggccgaaatgtggccctt  
gttttggctctatttaccaaaattagctcaggttctggtagacctctggctccaacattattccagtgagacatggaa  
aagcagtgagtttccctgggagtcaggagactgctgtccttgcaggggcatgtgtctgggcaaaccttccctgct  
ggaatctcttatcaacctTTAGACTCTCTCTGCCGGGTTTTCCAGAGATGATTTTCTCTCCAGACCCAAGAGATGG  
G  
TGAGTAGGCTTAGCAGCGATCTAATGAGGGAGAAGGCTTTAATCAGGGGGTGGGGAAGTGACACACGGTGAG  
TCAGCGGC  
CATGCTGAAACAGCTTCCCTTCTTTCACTGGGCCAAGAGGATTAAGGGTGGCAGAAAAGTT

>NM\_002749-Human-250hchr17\_P003938chr17+1922155319222253hchr17\_00319  
agaggggcggtgctcataaacatttctacatgaatgaacgaataaactatcggtatttgggggtgggtcgggacagctc  
ggtccagcaggggctccgcccaccgcccggctccgagaggagcagaggttgggcccggcctcggtaactccgctgc  
agcccaaagcacgggaatcgcgggacagacaaacagcggaggggaagatacctagaagccaggaaacccgagctgagc  
ccaacttggccggaagctgcggagaggctcagccaccggaagtcagtgagggttcggccggacgctctagaatcccgga  
ggaccgggatctctgtggttggcctgacgggaccctctaccgggatgacacattcccagagctcctgggaccaagca



aatggcggacacaattccctggggcgaaggggacttcggggagccagtagccaaggtaaacagtcccagacctgggcatctc  
aggccgggcagttccccagCTCACGGGACTAGCTGTGATTGGCCGGATGAGGTTGAGAGCTTCATGGGGACGCGCGC  
GC  
TACGTGCAGGGGCGTTGCCTTCCATTCACCTGGCGCCCCACTGCCAGTGCGCATGCGTTTTGAAGGCGGTGCAG  
GGCGGGG  
AGCACACCCCTGCGAAGTGCCGGGCACCCCTTGGGCGGCTCCCGCCGGCGAGCTGGACAG

>NM\_002749-Human-251hchr17\_P003948chr17+1922206919222769hchr17\_00319  
tgattggccggatgaggtgagagcttcatgggacgcgcgctactgacagggcggttccttcattcacttggcgc  
ccgactgccagtgcatcgcttgaaggcggtgacagggcggggagcacaccctgcgaagtgcggggcaccttgggc  
ggctcccggcgagctggacagcggcgcgccaggcggttctcggccggtgggctaggattggacgcagtagg  
tagaaggggcaggacctccgacagtagctcagcgattggccaggagctggaggagcgtggccttgggagggcgggc  
ggagggggacggacagggcagctcaagacgctgaggtggtggctgcgcccttgaacaagtaagtgagccacctcgag  
accccgcgctggggacgggagggcgagcctcggaacctgaaagccttgaaggagcgcgggggtgagtgcgggcc  
tgaggaaccaggtgccccGCCCTCCCTTTCTTCTGGCCCCGCGCCTCGCCTACCCCTCCCCGACCCCTGGCGGGCCC  
CCGGCTCTGGGCCCCGACCCCTGGGGTAGCTAGTCTGCCACGAACCAGCCGCGCGCTTCTGCCCTTGTCGGTTT  
AGGAAA  
CTGGGAAGTTCCCTGGTCTGCTCCCCAGCCCGCAGAGGGGACACTGAGGCCACCGGTAG

>NM\_002749-Human-252hchr17\_P003952chr17+1922560919226309hchr17\_00319  
cgggtgggcagaggggagacttgacttgacaaggcttcaggctttaccttccctgcccaactccccgcagatg  
gccccagcgcacccctggaggtcctgagcctcggaagccggtgacagcccaggagcgcagcgggagcgggaggaaga  
cggcgggagggcgaagaacgagcaaggagcgggagaaacggcgggcaggagcgggagcgaaggaacggggggctggggc  
ctctggggggccccctcactgaccttggctggactagtgtcagtgacaatgacagaagcctgttgaacgctggactc  
gaatggccccggccgcagcccagccctcactctgtgccggccccctgccagcgcgaacccaacccccagctg  
caacctaccagctcctcctctggccctgtagcccagcccactggcccccaaccacaatctcggggctctaccttggccc  
tgtacccagcctgcctgccCACCCCTGGCCCTGCACCCACCCCACTGGCCCTCCTGGGCCATCCCTGTCCCCGCGC  
CACCCAGATTGCCACCTCCACCAGCCTCCTGGCTGCCAGTCACTTGTGCCACCCCTGGGCTGCCTGGCTCCA  
GCACC  
CCAGGAGTTTTGCCTTACTTCCCACCTGGCCTGCCGCCCCAGACGCCGGGGGAGCCCT

>NM\_002422-Human-253EP30051chr11-102219349102220049hchr11\_00708  
atcccccttctaaatttcttagatattatctttatgtttgagtataattgtatagtagtagactatagctatgt  
atgtacacttccacttacatctttatgttttataatgttttctaaataaaactgctttagaagtctgcac  
aattctgattttaccaagtcaactacttctctctcaaaaggacaacataaattgtctagtgaattccagtaattt  
ttcagaagaaaaaaatgctccagtttctctctaccaagacaggaagcacttctggagattaatcactgtgtgccc  
ttgcaaaattgggaaggttgagagaaattagtaaagtaggtgtatcatcctacttgaattggaatggttgaaatgg  
tcctgctgccattggatgaagcaaggatgagtaagctcggggatccaaacaaactgtcactctttaaagctg  
cgctcccaggttgacctaCAAGGAGGCAGGCAAGACAGCAAGGCATAGAGACAACATAGAGCTAAGTAAAGCCAGT  
GG  
AAATGAAGAGTCTTCCAATCCTACTGTTGCTGTGCGTGGCAGTTTGTCTAGCCTATCCATTGGATGGAGCTGC  
AAGGGGT  
GAGGACACCAGCATGAACCTTGTTCAGGTAATTAACACTAACTGACCTGGCCAGGTGGGG

>NM\_002422-Human-254DBTSS:NM\_002422chr11-102219348102220048hchr11\_00708  
tcacccttctaaatttcttagatattatctttatgtttgagtataattgtatagtagtagactatagctatgta  
tgtacacttccacttacatctttatgttttataatgttttctaaataaaactgctttagaagtctgcaca  
attctgattttaccaagtcaactacttctctctcaaaaggacaacataaattgtctagtgaattccagtaattt  
ttcagaagaaaaaaatgctccagtttctctctaccaagacaggaagcacttctggagattaatcactgtgtgccc  
tgcaaaattgggaaggttgagagaaattagtaaagtaggtgtatcatcctacttgaattggaatggttgaaatgg  
cctgctgccattggatgaagcaaggatgagtaagctcggggatccaaacaaactgtcactctttaaagctg

gctcccagagttggacctacAAGGAGGCAGGCAAGACAGCAAGGCATAGAGACAACATAGAGCTAAGTAAAGCCAGT  
GGA  
AATGAAGAGTCTTCCAATCCTACTGTTGCTGTGCGTGGCAGTTTGCTCAGCCTATCCATTGGATGGAGCTGCA  
AGGGGTG  
AGGACACCAGCATGAACCTTGTTTCAGGTAATTAACACTAACTGACCTGGCCAGGTGGGGA

>NM\_002422-Human-255HSU43511\_1chr11-102219350102220050hchr11\_00708  
aatcaccccttctaaatttcttctagatattatctttatgttttgagtataattgtatatagtagactatagctatg  
tatgtacactttccacttcatctttatgttttataatgttttctaaataaaactgcttttagaagtctgca  
caattctgattttaccaagtcaacctacttcttctcaaaaggacaacataaattgtctagtgaattccagtcatt  
ttccagaagaaaaaaatgctccagtttctctctaccaagacaggaagcacttctggagattaatcactgtgtgc  
cttgcaaaattgggaaggttagagaaaattagtaaagtaggtgtatcatcctactttgaattggaaatgtttgaaatg  
gtcctgtgccatttggatgaaagcaaggatgagtcagctgcggtgatccaaacaaactgtcactctttaaagct  
gcgctcccaggttggacctACAAGGAGGCAGGCAAGACAGCAAGGCATAGAGACAACATAGAGCTAAGTAAAGCCA  
GTG  
GAAATGAAGAGTCTTCCAATCCTACTGTTGCTGTGCGTGGCAGTTTGCTCAGCCTATCCATTGGATGGAGCTG  
CAAGGGG  
TGAGGACACCAGCATGAACCTTGTTTCAGGTAATTAACACTAACTGACCTGGCCAGGTGGG

>NM\_004994-Human-256EP47014chr20+4407045044071150hchr20\_00288  
ggacagagcctggaggtggtggggaggggttggggaggatctgacctgggaggggtgtgcaaaaggccaaggatggg  
ccaggggatcattagttcagaagaagtctcagggagtcttccatcactttcccttggctgacctggaggtttca  
gaccaaggatgggggatccctccagcttcatccccctccctcttccatacagttcccacaagctctgcagtttgcaa  
aacctaccctcccctgagggcctgcggttctctgcgggtctgggtcttgcctgactggcagtgagactgcgggca  
gtggagagaggagggtgtaagcccttctcatgctggtgctgccacacacacacacacacacacacacacacaca  
cacacacacacacacctgacctgagtcagcacttgcctgtcaaggaggggtgggtcacaggagcgctccttaaag  
ccccacaacagcagctgcaGTCAGACACCTCTGCCCTCACCATGAGCCTCTGGCAGCCCCTGGTCCTGGTGCTCCTGG  
T  
GCTGGGCTGCTGCTTTGCTGCCCCAGACAGCGCCAGTCCACCCTTGTGCTCTTCCCTGGAGACCTGAGAACCA  
ATCTCA  
CCGACAGGCAGCTGGCAGAGGTGGGCAAACACCTAGTCTAGAGTTGGGGAGGGCTGTCCG

>NM\_004994-Human-257DBTSS:NM\_004994chr20+4407045344071153hchr20\_00288  
cagagcctggaggtggtggggaggggttggggaggatctgacctgggaggggtgtgcaaaaggccaaggatgggcca  
gggggatcattagttcagaagaagtctcagggagtcttccatcactttcccttggctgacctggaggtttcagac  
caaggatgggggatccctccagcttcatccccctccctcttccatacagttcccacaagctctgcagtttgcaaac  
cctaccctcccctgagggcctgcggttctctgcgggtctgggtcttgcctgactggcagtgagactgcgggcagtg  
gagagaggaggagggtgtaagcccttctcatgctggtgctgccacacacacacacacacacacacacacacacac  
acacacacacacacctgacctgagtcagcacttgcctgtcaaggaggggtgggtcacaggagcgctccttaaagccc  
ccacaacagcagctgagtcAGACACCTCTGCCCTCACCATGAGCCTCTGGCAGCCCCTGGTCCTGGTGCTCCTGGTGC  
T  
GGGCTGCTGCTTTGCTGCCCCAGACAGCGCCAGTCCACCCTTGTGCTCTTCCCTGGAGACCTGAGAACCAATC  
TCACCG  
ACAGGCAGCTGGCAGAGGTGGGCAAACACCTAGTCTAGAGTTGGGGAGGGCTGTCCGTGA

>NM\_004994-Human-258hchr20\_P005396chr20+4407247044073170hchr20\_00288  
tgctccccgctccagcttcttctctgacctcttctctctgctcttacgctacagatccaaaactactcggaagac  
ttgcccggcggtgattgacgagccttggcccgccttgcactgtggagcggtgacgctcaccttactcgc  
cgtgtacagccgggacgcagacatcgtcatcagtttgggtgctcgggtgagaacgtgaggagggaaaatccaagagacc  
tgggccccgggtcagggagggaggaccagagagcgtggaggcagcagtggtggccccggcttctcttgcctgccccgctg  
ccctggcttatacggcccctctgcagacagtgcaagggccagggcgccaggtgggagagcttgcgcagggcggtat  
ttcagcccacttattcggagcccttgccttgggcagcgcacaatctgcgcagcagtagtactcgctaacccttctctc

tcgacctgtttctcagagcACGGAGACGGGTATCCCTTCGACGGGAAGGACGGGCTCTGGCACACGCCTTTCCTCCT  
G  
GCCCCGGCATTCAGGGAGACGCCATTCGACGATGACGAGTTGTGGTCCCTGGGCAAGGGCGTGGTGAGAT  
TCTGAGT  
CCTCCTGGCCCCCTGATTCCCTTCACTTCTCTCCACTCATCACCCGCCGCCCTAACTCCGG

>NM\_006039-Human-259DBTSS:NM\_006039chr17+5805825858058958hchr17\_00037  
gctaggctgctggagacccccagaaagaggcgggatggcggggcgatgctggcggccgggtctggccacctgggtc  
agctgcacgccccccgggctggcggacctcgtagcccaggtccaccacgcccgaagtgtcggaagtttgc  
agttgctccccgcccgcagcggggagttgtgacgcagcgtctgggatcctggcgggacagaagagaggggaagg  
cgaggcggggagagactgggaaacagagcagcaagagaaagggcgacgctggggtcctcctggaccggcgtgtcctc  
tccgccaccctttctcctcccagcgtctagccccagaccgcgctcctcccctcccctcccacgctgccca  
ctccttccccttaccctcgaacctcctcccgggtctgcgctcctcccctcccctcccctcccgggtgctc  
cctcctcctcctcccgggAGGCATCACTTCGTCCCGACCCGGAGGACGCGAGCCCCTTGCGGGCGGTCATCACA  
G  
CCCAGCCTCGGGGCTGCCACAGCGCGTTGCGCCTGTGCGCCCTCGGTCCCCGCGTCCACTGAGCGCCGCGCTCG  
GGGATG  
GGCCCCGGCCGGCCCGCCCCGCGCCCTGGCCTCGTCACCTGCTGCGCTGCGTCCCTGCTC

>NM\_006039-Human-260hchr17\_P012018chr17+5811078958111489hchr17\_00037  
gggggctgccccggtcacagctgaaggacagggggcacgttgggtcctcccctcactcccactcttccgctc  
cccactcctgggtgtgctgaagtgaatcagaaccgagatccacgagcagcactggttctggatcggcctgaaccgtc  
ggatcccagagggggtcagagtggcgctggagcagcggcgtaggggtgaggggctggggtacttgggactgcgaggc  
cgggagcttgggtggcgggcctgttggggcggggcctggaggtggcggggttttcttggggccgggccccagtcgg  
agccggtcaggaagcaggtccgagaggggtcaccggccccgggtgagaattcgagctcagccaggcctctgtt  
cacctgttccggcatggggcggcctgcacctgacgttctcctcccctcccctcccctcccctcccctcccct  
accacaatttcgaccggagcCGGCACGACGACGACGACATCCGAGGCTGTGCGGTGCTGGACCTGGCCTCCCTGCAGT  
GG  
GTGGCCATGCAGTGCACACACAGCTGGACTGGATCTGCAAGATCCCCAGAGGTTGGCCGGAGTGGCGCTGGG  
GGACGG  
GGATGGAGCGAAGGTTGGCGGGCCAGGAATTCCAGGGAGGGTCTCCTTTCCTCACAACG

>NM\_002357-Human-261DBTSS:NM\_002357chr2+7005335370054053hchr2\_01239  
tccgagcggctgtgaatcagcgcgcccagcgcggaccggccctcccagccaatgcagaccggtgaggagcagcc  
aggctgctgacctcagccacttagggctgcctggcctggagaaaggtgacatcatcgtagctgggaggttccgaagg  
cttcccaatgggagaccggcaggtgcttgccttctgcagctcttggccaataactaacaagcaaaagggggccgggt  
tgttggtatagaaccaatgggaaacaaggaaggagcagaggcggagtgcgaatcctgtcaccagttggaaagaggggg  
tggagccccggccttgcagtgtgaccaaccagcagagaggcggacttgcggggtggagccctgaagccctcctcca  
atcgcaaatgtagggcggggcattcttggggggcccaatgaggaacggcgaagctggcctgtcaagagaagg  
gctggggcggggagatggtGAGTCGGGATAAACACTCCGCGCGGTGGCGGCTGCTGCTCTGCTCCGGTTCTGT  
AC  
TGTGTGCGCGGTGCCAGCTCACTGGCCCCCTCCCTCTTGTGCGAGCGTGGTTGCCAGAGAGGCTCCCTCAGC  
CCTGCT  
CCGCGGGGTCCACAGCGGGCTCCACAGCGGGCTCCATAGCGGGCTCCACAGCGGTCCGGC

>NM\_002357-Human-262hchr2\_P005523chr2+7005284170053541hchr2\_01239  
atgccattctgaggtcaggaagtctctgagctttaaagcgcctcgcgtgaaagtaattaatttccatcactcc  
cgggggtggagggggtgcggaagggcgtatgctcaatgctgtatactgcagccgattccagctcttcttgagg  
cagaaaaaacggcagcggcgagcatttaacaacggcggcttcttctcaagccccgagcagccagctggcgcctgc  
cctagctcccggctcaccggcactagcctgaccgctcttgggaggttgcaggtgggcccctcgcagcccgagttc  
cgcaagcccagaacctccagggcggccaccagaccgggctcggccccgaaccaagcggggcagagcggccag  
gcgacacgaggtgccagcctccattgatggacgctggcaggtccccggaagtttccccggggacaggtcttggca

caggtccgaggaaggccggGTGGAGCAGAGCTCCGCAGCGGCTGGTGAATCAGCGCCGCCAGCGCCGGACCGGCC  
TC  
CCAGCCAATGCCAGACCCGGTGAGGAGCAGCCAGGCTGCTGACCATCAGCCACTTAGGGCTCGCCTGGCCTGGA  
GAAAGG  
TGACATCATCGTAGCTGGGAGGTTTCCGAAGGCTTACCAATGGGAGACCGGCGAGGTGC

>NM\_000615-Human-263DBTSS:NM\_000615chr11+11233685112337551hchr11\_01121  
caacggcaacccccatccctctccaaagttaatttcccgcacttaaagtcctgggctatccttgtgtgcaaggatct  
tagaatgaaatggaggatttgacaactttacctaaccaaatctaaaatttgcctttattattactagttatcaaaa  
tatgcaaactgctgattaaggaaggctgggtagcaggagcgctgcgaaggcgtagggtagaagtgtgaaaagaaatccc  
agctctcccagggagactgcgtgtgaaagagcccggctccccaaaagctccaggccgcttttgaggcttccgcatct  
gcctccctgtctcttacctccttgatgttcggcactatttggccggcgtggtggaaggacacagtgaggttctcac  
ccccccccgcctcctcctccatcccagttccatcaaaacgaaccgggcccagcgaaggatctccgagttgcgagt  
gtgctgaggctgggactgtACTCATTCTCCGATCAGCGCGTGAACGCAGCTCGGCTGCCGCTGGCAGGAAACAATTCT  
G  
CAAAAATAATCATACTCAGCCTGGCAATTGTCTGCCCTAGGTCTGTCGCTCAGCCGCCGTCCACACTCGCTGC  
AGGGGG  
GGGGGCACAGAATTTACCGCGGAAGACATCCCTCCCAGCCAGCAGATTACAATGCTGCC

>NM\_000615-Human-264HSNCAM5R\_1chr11+112336850112337550hchr11\_01121  
gcaacggcaacccccatccctctccaaagttaatttcccgcacttaaagtcctgggctatccttgtgtgcaaggatc  
ttagaatgaaatggaggatttgacaactttacctaaccaaatctaaaatttgcctttattattactagttatcaaaa  
atatgcaaactgctgattaaggaaggctgggtagcaggagcgctgcgaaggcgtagggtagaagtgtgaaaagaaatcc  
cagctctcccagggagactgcgtgtgaaagagcccggctccccaaaagctccaggccgcttttgaggcttccgcatc  
tgcctccctgtctcttacctccttgatgttcggcactatttggccggcgtggtggaaggacacagtgaggttctca  
ccccgccccgcctcctcctccatcccagttccatcaaaacgaaccgggcccagcgaaggatctccgagttgcgag  
tgtgctgaggctgggactgtCACTCATTCTCCGATCAGCGCGTGAACGCAGCTCGGCTGCCGCTGGCAGGAAACAATTC  
T  
GCAAAAATAATCATACTCAGCCTGGCAATTGTCTGCCCTAGGTCTGTCGCTCAGCCGCCGTCCACACTCGCTG  
CAGGGG  
GGGGGCACAGAATTTACCGCGGAAGACATCCCTCCCAGCCAGCAGATTACAATGCTGCC

>NM\_000615-Human-265HSNCAM5R\_2chr11+112336856112337556hchr11\_01121  
gcaacccccatccctctccaaagttaatttcccgcacttaaagtcctgggctatccttgtgtgcaaggatcttagaa  
tcgaaatggaggatttgacaactttacctaaccaaatctaaaatttgcctttattattactagttatcaaaaatgc  
aaactgctgattaaggaaggctgggtagcaggagcgctgcgaaggcgtagggtagaagtgtgaaaagaaatcccagctc  
tcccagggagactgcgtgtgaaagagcccggctccccaaaagctccaggccgcttttgaggcttccgcatctgcctc  
cctgtctcttacctccttgatgttcggcactatttggccggcgtggtggaaggacacagtgaggttctacccccg  
ccccgcctcctcctcctccatcccagttccatcaaaacgaaccgggcccagcgaaggatctccgagttgcgagttgct  
gaggctgggactgtcactcaTTCTCCGATCAGCGCGTGAACGCAGCTCGGCTGCCGCTGGCAGGAAACAATTTCTGCAA  
AA  
ATAATCATACTCAGCCTGGCAATTGTCTGCCCTAGGTCTGTCGCTCAGCCGCCGTCCACACTCGCTGCAGGGG  
GGGGG  
CACAGAATTTACCGCGGAAGACATCCCTCCCAGCCAGCAGATTACAATGCTGCCAACT

>NM\_000615-Human-266HUMNCAM3\_1chr11+112631308112632008hchr11\_01121  
cccactagagatcaggcctcccagtgctccaggggtgagtgatgtgtcccggcaaaactgggctgttttcaaaaataatt  
ttatagtgaggatttctactcaaacacttctatttctcctatttcaggctgttctcaagatgtgtcaggcttataa  
aaattaaatctcagttgtaagaccagctaaaaggaacataagtagcagtgagacaggggaaaaaaaaaaaaaaaaaa  
agcctattcctaaaatggtgaaaggacctgctcacaggaaggctatttaccagaacattccaagaggcactctcagtt  
tgggctcagctgaggcatctacctggaattcagtttattattgtcttttaaccatttgaaattctgagaaaagcaa  
gaaaagtgtccagccccacctgctcctccattcagatgggttggattttcattctgtgatgagaatttcatgt

gaattaactggctgtttcagGGAACCCAGTGCACCTAAGCTCGAAGGGCAGATGGGAGAGGATGGAAACTCTATTAA  
AG  
TGAACCTGATCAAGCAGGATGACGGCGGCTCCCCATCAGACACTATCTGGTCAGGTACCGAGCGGTGAGTGG  
CCTCCTT  
CTCAGACTTACCAGAACCCTGCAACCCTGGCACCCAGCTTGCTAGGGAAACAACAGGGG

>NM\_000615-Human-267hchr11\_P013586chr11+112339007112339707hchr11\_01121  
ctccacggcgaccaatcagtgcgaagctggctgggcggaagccgcgagaggcttttattcgggcgcgggtggcgcca  
ggagctgccaggacagtctccgggtctcagcctaacggtctcgtcactaccgccaagagaacccccctgcggc  
cggccccccgctcccggcagttccgaggaataaaatggagactaggtggtcaccgggagtgctcctggctcggccg  
cccgtgctgcccactctgccttttcacgcccacttggagcatcccaccgccccccagcgtcactctcgcgccc  
ggaatccgggctgagcgcgtcgggggagggcatcctggcaggcacacctacgcgctgctgactaccgcccaccg  
ggccggggctcactgacggcgggcgggcgctggcagggcccggagagggggtggggaccaagcctagtccgct  
ggcctgggtctcgtgccACCTGGGCGGGGGCCACCCGGTTATGCCCTTTCCGCGGTGCCCGTGGGTGCCGCGAC  
G  
CGACCTGTCCACATGGGGCGGGGAAGGGGGGTGTTTTGAGACATCCTCGCCCCGGGTGGGAGCGTGACAA  
TGGAGCC  
CGGATATTTGGTGGGCCTTTTGGGGGATCGCCTGGCGGTCTTTCCATCATCGTGATGGG

>NM\_000615-Human-268hchr11\_P013594chr11+112648742112649442hchr11\_01121  
ctgtgctaactgcatccccaccctatggctcctgtcctggctcagccctcctcctcgttctctgtcacgtctc  
agcttcattgtctattctcttacttctgctcctccacaggtgctcctccgacactacggccactgtcaggacatgc  
tgccttctgtcaccaccgtcaccactaactctgacactatcaccgaaacctttgcccactgctcagaacagccccaccgt  
gagaccaccaccctgacctcagattgccccgcccggccacggccacgctgactcaaactctgtaccggctggccaggc  
caccctccaagggcccagcgcctctgcccctccccggccccagctcagcccccaaggtcgcctcctggtgacc  
tgagcgacccccgacctcaaccctgcccgtagcaattgtcttctagtgctcctggtaaccaaggggctgtcctcagc  
ccaagcctcctgctggtgtCGGGGAGGCTCTAAGGCTCCTCCGGCCAGCAAGCCCACCCCTGCACCAGTCCCCACCC  
C  
GACTGGGGCAGCCAGTCTCTAGCAGCAGCGGCTGCCCTGCCACAGAAGCCCCCAGGCCAAGCAGGAGGCTC  
CCAGCA  
CCAAAGGCCCGGACCCGGAGCCCACCCAGCCGGAGCCGGAAGAGCCCGGCCGAGGCAG

>NM\_004554-Human-269DBTSS:NM\_004554chr14+2390673123907431hchr14\_00094  
tccgagcaactcgtgccactctgccccaggacctcctggcctcaggctggagggaaggggaggagaagtgttct  
gccttctaggtgctatctacacagtctcagaatttaaaaaagggtctcctgggctctctaccctggggcccagga  
tgtggcccttaaggctctcggaccagaacctgaaactgagactagggagggtgggggctggtctctcgggaaat  
gattgtcacaacggcgaccaataggaacattagatcactctgaaggacctttccaattcagtttttttttt  
gagggggagggactgaagagaggacaggggagggaggggtgggggaggacgaggggctggttttccatctcatcc  
tggaggaggggctggagcatccccggcagccaatcaggacaggtggggggggaccgcttgaagaagttgggggaa  
aaaagttgaaaagtttctATAATAACGAGGGGGCTTCTGGAGGGAGGCGGCAGCGAGGAGGGGGCTTCTCAG  
AG  
AAAGGGAGGGAGGGAGCCACCCGGGTGAAGATACAGCAGCCTCCTGAACTCCCCCTCCACCCAGGCCGGGA  
CCTGGGG  
GCTCCTGCCGATCCATGGGGCGGCCAGCTGCGAGGATGAGGAGCTGGAATTTAAGCTG

>NM\_004554-Human-270hchr14\_P001114chr14+2390546723906167hchr14\_00094  
cctcttaggtacaggctggtgatgggtcaggtgttctcctcctcctccccgtgggttctcctcctttattccg  
agatgaagctggaagggaatgtaacctgaggagaccaaccaaggaagaaaaaaagaaaaaaagaaaaaaagaaaa  
gaaagaagaaaatcaaccaggccgtccccgctcggcctcggacattctctcctcccccgccgtgggtctctc  
ccccctcctgtgtgcccctgggctcggagccggggcagctccgcactgggggtccccgggactgggggg  
gtggtccctgggcccggaggagaccgaggggagggagggagccgctcggccgtgaggctcgggcccgt  
ggccagccctccttccccagctccgtagacctgttctcattagagtaacgggcgctggtccccgcccgtctc

tgagtgtttgtaaactctgACCTGGGGCCGCTCGCTTAACCGTTTAGTTGCTGGGATGGGGCGGCGTTGGGGGTGCGGC  
C  
CTGAACCGGAGGGATTTAGAGACTGGAGACGGCCCTAAGAGAGGTTGAAACTGTGTGTGTGTGGGAGAA  
AATGATAA  
CCACCCCTCCCATCTCTCCTACCCGCCAGCCTCGCCAGTATCTCCACCGAGTCACGAATC

>NM\_004554-Human-271hchr14\_P001125chr14+2390757623908276hchr14\_00094  
tggggggtgagggagtcaagggtcgaaggagtcggggggactcgttggcctgcggaagtgaggctgggggccgggac  
cactttctcttttaggtcgtgactgggggtgggggtgggggtgctgttggctgtgcgccctccggctgggcccct  
gtcactgaaactggggggcgggcgggaaactacggcccaacagcaccaggcgccaggggaaggggaggtttggcgtg  
gagctggcccctggcggaaccgagctctggcccggcactggaccccggggctggggcgctgtcaggcctcgtgggg  
cgcccctccccctccccctgtggccgcaatgagaggcagatggcggggaccgagccggggcgggcgcccgctcgca  
cgaatccgcgtgcccctgccccctccccggctgggcccagcacgcatcaccctcggctgcacctccgccccta  
gatggcgaggagaggggagGAGCCACCTCCCCTCGTACCACAGCCCTGACGCCCCCTCCCCTCTGCCACGGTTG  
CG  
ATGGCAACTGGGGCTCCTGCCAGCGCCGTTTGGGGGTTTGGGAACCGCTGCTAATTGGGTTTCATGTGTGAGTC  
GCCCCA  
GTCCAGCCCAGTGCCTCAAGAAACACGCCTCCAGGCCAGCCCCAGCTCCAGCCCCTCTG

>NM\_004554-Human-272hchr14\_P001133chr14+2391566223916362hchr14\_00094  
gggggggctcctctttctccctggggctgccattctctccgccagccccttcggccctcctctctctgcatcccc  
accgctgaaggccccttccctccagagtgatgtgcatcccctacctgctgaggatacaataaggtaggccaggct  
atggccctggggaggggctccggagcaggagaaatccaggggtggctacagcagggctccgagacagtgccctatc  
cagggtatcacgtggaggaaggtgggtgtgggactggggctgtgagtgtagtgcaagagattgctctcatgt  
ttgctgagggtggagctgggcttttcagagatcgggcatccctggctctcaggccagttggaggtcccaggaggca  
tgttcttgatcctgtggctgctgaatccaattaactgaattctgaagagtcatgggtaactgtctcagcctttctc  
ctgtctctgcctctgtcctcTGCTCCAAATCATAAAATCTCAGAGCTAGAAGCACTTCAAGATCATTCCATCCAGCGC  
A  
TTCAATTTGCAAGTTTAGCGGTTGAGTTCCAGAGAGGGATGGTAGCTTGCTGAGGTCCCAGTCAAGCACACTT  
GCCATTG  
CCTCAGCTTTCCCCTAAACACGGTGTCTGTGGTCAGGGTTGGTGAGGAGGAGCTTTCCTG

>NM\_013432-Human-273hchr8\_P012404chr8-145640533145641233hchr8\_00658  
tacgtcccacagccaaatgctcgtgaattatcgtcagctctatctggacactacgttcgttttaatagttgcgcctgt  
gagcaggctgtgtgtgaatttcgggaggaattggggcgggcagcagctgtccacatgagtagcggggcggcagc  
ggggctgcagcccagaagaccaccagggcgctgcgaccccggagggctggctccggggccccggcctcccgcgt  
ccccccgctacgaggaggaacgggggtcccaccagcactccccgggcccggcagagggctccacgcgggccaacc  
cggcgtccgggaagacggcccctagggtgggaccccagttgtcggccaccccggccagctcctcccacagagaa  
ctccgaggatgccggggggccgaccgtacttcccgaatgccccgcccggccgctcagggggcggggctg  
cgtgtcggcgggcaggggGCGCCTGCGTGTGCGCGGCGAGGGGCGGGGCTGCGTGTGCGCGGCGAGGGGCGGGG  
CT  
GCGTGTGCGCGGCGAGGGGCGGGGCCGCGCGCAGCGCGGGAAGTCCGGATCCCGCGGCGATCCGAGCATGAG  
CCTGGAG  
CGCGAGCTTCGCCGTAAGTTTCTCGGGGACCCCTTCCCTCCGGGGCGCGGAGGCTGGGGA

>NM\_006200-Human-274hchr9\_P003550chr9+7573467475735374hchr9\_00470  
aaataaacagctgctgaaaagcatgaagaattaacgaagtgaaaatctcagttattgttcggcaattgacacgtaagt  
gacctcctaaatgcctagtatttaaggactttagaacgaggatgaatgaatctcagggcggttaattcgaccggc  
gtgtaaatcttttagctttcgggaagtggcggttaattcatacaaatccagcagggagggagagaagggagtaaaac  
cacgatctcggagcgtcttctcagtcctttgaaagactgccttactgcccgaaccctggaggttacagctggggc  
aaccggaggcgttagacctcgtcagcgcctggctgcggcctttcaagaggcgaggaggaggaggaggaggcga  
tgtgggaaaggagggtgtaagggggcgggggaagtcattatgcagagcaggagctgctgccattgccactcagaat

cctcgcgctgctcggagcCGGAGGGAGCGCTGGGAGCGAGCAAGCGAGCGTTTGGAGCCCCGGCCAGCAGAGGGGG  
CG  
CCCGGTGCGTGCCTGTACCGCTCCCCTGGTTCATCTCCGCCGCGCTCGGGGGCCCCGGGAGGAGCGAGACCGAG  
TCGGAG  
AGTCCGGGAGCCAAGCCGGGCGAAACCCAACTGCGGAGGACGCCGCCCACTCAGCCTC

>NM\_005391-Human-275DBTSS:NM\_005391chrX+2424252724243227hchrX\_00608  
aaaaagagaatcagcgaactaacaatccagtccaaggtgttccaaaggtgttctcttgggagtcaggcagggaggtggg  
ggtggggctgggcccagaaacagagtcagctagtaggtgtaaaatctaagtcaggtgagcgaacggcaagtcc  
tcctcccggaaaaggcgcctgctggttgagaaggtcttgagcagcgcggaggatcggattccgggctcctgcctctcc  
cggtcgcgggacctcggctaccttccggcagcggagaaccagccagagggcggagctgaaagcggctgcacttgctgg  
gctgggctgagtcacatgagccagggaggggggtctctggcgcgcgcccggacaaaacacaaacgtcacagaggcagcg  
gcgccaatcagtgaggcgcgcgccgctgcccctcgcctcctcgcctcccctcgcgcgcgctacgtgcagc  
aaccgactccgccagcagGCGGAGCCTAGGGAAGCCGCGGGCGGCCCGCGCTGTCTGGAGCTGCTGCTGCTGCT  
GC  
GGCGGCTGCACCGGCGGCGCCGAGCCGAGATCGAGGCCGGGGTGC GCGCTTCGCAAACGTGCCCTATCCGTGC  
GGCTTG  
GCTGCGCCAGCCCTTGC GGCCACCCGGGCGTCTAGGCGGGTCTGTGCGCCGCCGGGCGA

>NM\_002664-Human-276EP73755chr2+6850356568504265hchr2\_01236  
cgtgagctaccatgcctggccgatgtcagactaatatgattaaaataagtaggctgagaaacacttgatacagggctt  
ggcatagagagaagtaggcatcatttagtagttaactttgtatgctaaccagatggttctgaatttctggcattttt  
attgggcatttccaggatctcaagaataatccttactcaggacaattttaccaacaagttttctgttcatcttctc  
ttcctttcatcacttttttcttttaaaagagggattttctgtatggtagtaagaatttcccttaggtaaatattca  
cccaactgtggttttaataagtctccagcattagcaaggaatgggtggttactctgcagttccttattctgatcttca  
accagtgaggggaagaggatgtgatcatgcgaccgagcagaagggaaattgtgaaagcgacctgctgtagaaaagg  
ggccacagccacctcagcaTGCAGAGGAGGCCAGCTGCTGAGAGGAGTTGCTGAGAGTGACCTTTGCATCTGCT  
GT  
CCAGCCAGCATGGAACCAAAGCGGATCAGAGAGGGCTACCTTGTGAAGAAGGTGAGCGAAGGTGCCACTTACC  
AGGGTGT  
CAGTGGACATGGGCTGGGGAGACTTGGGTTCAGCTCCACCGGCTACCTGCTCATCTTAGG

>NM\_002664-Human-277DBTSS:NM\_002664chr2+6850356468504264hchr2\_01236  
gcgtgagctaccatgcctggccgatgtcagactaatatgattaaaataagtaggctgagaaacacttgatacagggct  
tggcatagagagaagtaggcatcatttagtagttaactttgtatgctaaccagatggttctgaatttctggcatttt  
tattgggcatttccaggatctcaagaataatccttactcaggacaattttaccaacaagttttctgttcatcttctc  
cttctttcatcacttttttcttttaaaagagggattttctgtatggtagtaagaatttcccttaggtaaatattca  
acccaactgtggttttaataagtctccagcattagcaaggaatgggtggttactctgcagttccttattctgatcttcc  
aaccagtgaggggaagaggatgtgatcatgcgaccgagcagaagggaaattgtgaaagcgacctgctgtagaaaagg  
cggccacagccacctcagcaATGCAGAGGAGGCCAGCTGCTGAGAGGAGTTGCTGAGAGTGACCTTTGCATCTGCC  
TG  
TCCAGCCAGCATGGAACCAAAGCGGATCAGAGAGGGCTACCTTGTGAAGAAGGTGAGCGAAGGTGCCACTTAC  
CAGGGTG  
TCAGTGGACATGGGCTGGGGAGACTTGGGTTCAGCTCCACCGGCTACCTGCTCATCTTAGG

>NM\_144773-Human-278hchr20\_P017574chr20-52447595245459hchr20\_00367  
tccaccttggctgtagtaggagcagcggggaccggggcggagtcagcgcggggcggggcgacaggtccgaga  
cgctggaagagctgtggggcggagcgcaactccagctggaaccagagaccctgacacgaggagggagcccgggg  
gagggaaaaaaggggacatccccacgagcggctctgcaagtgcagtcgggtcctcaggtgaaaaccgagcggc  
ccgctgcgccaaccactgtgactctgatccggctccggagcagcagagcgcacagaaaggaggcggcggagacag  
gtaagggcttagatccctgagtcgggactcagtcgggtcggtggggagtcgctaggacaagggccttgacgcca  
ctttttctgggcatccggctgtttgctcccgcactctcagatagtcgctcggggctggctccaagcaggcgag

tggtttcaggagatcccctcTGGGCCCTCTAGGACCGGGTAGGGTACGGTAAGCGGAGTCTGTGGTGTGCGGGCGCGGG  
C  
AGAGGGAGCCAGCGGGTAGCTGAGCTCGCGGACGAGCTCCAAATTGCAGGGGAGGGTGCAGGTAGAGGGGCAC  
CTTCCTG  
AAAGGTGAGCAGGAAACAGCAAGCGTCCGTGGGGAAATTCCCGCGCACCCGCATCCTCCAC

>NM\_144773-Human-279hchr20\_P017576chr20-52439665244666hchr20\_00367  
cctctagacgccgacagtgcggccgcttgatggggcgggaagggggctgctggaacgggtcgctcccggcggggagtg  
caatctacgaaaatcgggctgggacctgtcccagccggcgcgccctctgtctgggttagggggctggaaagccg  
aggagggtaggactcccattctgtgtcccacgctgagcagaggctgcggggattgggggtcgcgatgagacggagggg  
cgacctggagagaagacacctccgggtgtggacgccactgggattgcatctgcctcttgagggtttcaccttgggaa  
agcagctggcggcgccaccaggttaggggtcttttctgtggcgcgcagttcctgtccctggcgttctcctcccctcg  
caggagtggacaaatgcattgttcagctgggtcatctctgtaccagcatcccgcggcgcccacatgtggagtcgt  
ttccaggtgtgctgagaggcGAGGGGAAGGCCACTCACAGCTGGACAGCCAGGGCCCCCTTCTATAGGTGTTGGGATC  
TG  
GGCTCTTTTTCCAGCCCCTCGGTGAAGCCTTGTACCCTGGGGTGCCTATCTCCTGCGGGCTGAGGGCTTCAGA  
GACTAT  
TTTCCCTATTTTGAGACCTTGGTGACAGGACATGGTGCCTTTCAGGCAGGGTTGACTCTG

>NM\_144773-Human-280hchr20\_P90095chr20-52428145243514hchr20\_00367  
tgtaggagcctggccagctcatgggagcatccttggaaatgtccagaagccccttgggagctgatgttgggggctg  
gaggatgtgactgggagacaaagaggccctggcccctgggcaaagggcaaaggtgcacattctctgagagttctgga  
cagtctgatccatcctatgctgtccttctgacagctgggagccacggagggtttccaacttacagatctcaggtctc  
ctctcccgcacccggtagttccatctggttaggcagtggtctggttggcctatacttggggaactcagggaatgtg  
accagatgttctcctcatgtgcccactggtgtgctccttccaggatccaggacggtgagtaactctcccgaagga  
tgtgggcagggtgctaggctcactgacctgaaagagcagaaggtctggaccctcacctcctcaccacac  
tttcttgagacatcaccaTGGCAGCCCAGAATGGAAACACCAGTTTCACACCCAACTTTAATCCACCCCAAGACCAT  
G  
CCTCCTCCCTCTCCTTTAACTTACAGTTATGGTGATTATGACCTCCCTATGGATGAGGATGAGGACATGACCAA  
GACCCGG  
ACCTTCTTCGCAGCCAAGATCGTCATTGGCATTGCACTGGCAGGCATCATGCTGGTCTGC

>NM\_003978-Human-281DBTSS:NM\_003978chr15+7507403375074733hchr15\_00162  
gccggggcctcaggctgtctcctcatcttctgctcctcacttgcctctgtgtgctcacagccccagagcacag  
ctgtgctgctcccagactatgggctccttgaggcaggacctggttgggtcccagagcagccagggttgatgaatga  
cagatgccctagacctgggtaagcccctccagaatgacttctgtagtgcgggggtggggagctggcatctctgggcccagc  
ctggaaggggtgctggactggctggcgggtgacacacctggggtcctgggcccctcctggccactgtcagtgggcctc  
aagctcccttagcatatggcctctggaataaagtgagcccacactcgggagggggcaagcagaggcaggagcaggatgg  
cagggtggcaggcggggctgcacaggggagcacagcaactccacttctgtggcgaggggcctgtgctgccccggggga  
ggttgcacaaaccttctgcGCAGGCCTCGGGCTGCCTGCCTGCCTGCCTGCCTGGCCCCGCCCCGAGCTCCAGCCTGCCT  
CTTCCACTGGCCACTGCCTCCCACCCAGGGCTGGCATCCCTGCTCCCTGCCCTGGGTCCCAGACTGTGTCTCCA  
TCACC  
GCAGGGTTCGGTGAAGGGCTGGGGCTGGACACCAGGGCCCCGCCCTCCATCACTGAGCTCCA

>NM\_003978-Human-282hchr15\_P006314chr15+7507222175072921hchr15\_00162  
tgatcgagaatagcatgtgctaaaggctggcctctcattcctatggcaccatcagccccgtggcttccctagattgtt  
ttccttttattgactgggtgagagggtctcgaggtagaactggagaaaggaacaatgaaacgcttttgaatagagggc  
tgtagtaaaagacaactgtggaagtaagagcgtgtgcttggctcggacagatcaggacaaagcccagcctctg  
ctattgctgctacttgggtgcttacttacactcttaatacactagtttggcctctgtaagtggggataatgacag  
tgtaactgaggtggtccgtgtgaaaagcagaatgatgtaccgggtgctgggtaagtactccaaagccgaattgctgct  
ggtcggcagcctgggagctgcaacaggtgaaggggtggaagggaggagggaaggcctctctagtagagaattgcag  
agtctcctcagaggttctcACATTACTTCTTCCCCAGTTGCTCCAGCCCGTACCAGCATGGCCCTCCATCCGGGGCT



GCCCTGGCTGGACAGGTACAGTTGGGAAAGGAAGGCCTCATGTGTGGGAGCCTTGAGGTTGGCTTTGAGGGTG  
GGAGGAT  
TTGCCCAGGTAAGGAAGATCAAGGAAGGCTTGCCAGAAGGGAGGCTGGGAACAGAGCAGG

>NM\_003978-Human-283hchr15\_P006319chr15+7510721275107912hchr15\_00162  
gcgccctcggctcagaacctgtgtccctgcagatgagccgtcatggaccgggtccagaagagcaagctgtcgtc  
tacaagaaggccatggaggtagcgcaggccctggggccgcccctccctcaggagcagcgcaggtctcagggtgcg  
atcctgggtgtggccccgggcagggcatttggaacaggctgacctcagccttggtcctcgacctcggccttgggcgca  
ccagctgcggggcgcttgggcccgtgctgggctatggcccgtggggatgggtccgggccccttcccttgggggctc  
gtgaatgaaggcagatgaagtgcagctggggactccagggtggaggaggaggaccctgagcttgatctgcgagac  
gctggacaggaaggagaggggctcctaagagggcgccgctggcgagggcgctggcgagggcgctgcctcgcgaaga  
gcacagcccaggaggcgggGCCGGGGCAGGCCGCTGTCTCAGTGGGGAGGGCCTGAGAGCAGGACTACCAGCA  
GCC  
CCCACGCCTTCTCTATCTCCTTCCGGACCCCAAGATCCCTGTCCCTGGTGAGGATGCCCCACTCCACCCGCAAC  
CCTCG  
CCAGGGAAAAAGGGAGGCTGGGCTAAGGGAGCCTCACTCCCGGGACCACAGAACAGGGC

>NM\_002838-Human-284HUMLC01\_1chr1+195339324195340024hchr1\_00752  
ggggcaaaactgttaagctgtctgaaagtgtttgcataagaaatgggtttactgctaaaactgtcatattgctgag  
ttgaaatgccctaattgtaaatgatactgggttgccaaaaataaccagattagtagttttcattcatttggccgtctc  
agtaagtcaaatattgatacttctactaagtcatcttccaacacccatttgtatactatgctgaatctgtttgtc  
atctcttaagtaagaaaattattgatttttggggatttaatttaaaaaaatggtaatggatactgtaaggagca  
ttatttggatggttataaacatcttcttgatgggaaaatcttttaaaaggcttctaactggtgtaattacttgaat  
taaggagtgcatttactgacttagaacaacttttacttctgcaagaggacccttacagatattttgg  
agaagtagtaaaaccgaatCTGACATCATCACCTAGCAGTTCATGCAGCTAGCAAGTGGTTTGTCTTAGGGTAACA  
GA  
GGAGGAAATTGTTCTCGTCTGATAAGACAACAGTGGAGAGTATGCATTTATTTATTTACTTTTACATTTTTG  
ATTCGTT  
TTTACAGAGAAAACTTCTACAGAGATAACAATTATTTTGCTTTTCAGAAGGACGCATGC

>NM\_002838-Human-285HUMLC01\_2chr1+195339330195340030hchr1\_00752  
aaactgttaagctgtctgaaagtgtttgcataagaaatgggtttactgctaaaactgtcatattgctgagtttga  
tgcctaattgtaaatgatactgggttgccaaaaataaccagattagtagttttcattcatttggccgtctcagtaag  
tcaaatattgatacttctactaagtcatcttccaacacccatttgtatactatgctgaatctgtttgcatctct  
taagtaagaaaattattgatttttggggatttaatttaaaaaaatggtaatggatactgtaaggagcattatt  
ggatggttataaacatcttcttgatgggaaaatcttttaaaaggcttctaactggtgtaattacttgaattaagga  
agtgcattgcttactgacttagaacaacttttacttctgcaagaggacccttacagatattttggagaagt  
tagtaaaaccgaatctgacaTCATCACCTAGCAGTTCATGCAGCTAGCAAGTGGTTTGTCTTAGGGTAACAGAGGAG  
GA  
AATTGTTCTCGTCTGATAAGACAACAGTGGAGAGTATGCATTTATTTATTTACTTTTACATTTTTGATTTCGT  
TTTTACA  
GAGAAAACTTCTACAGAGATAACAATTATTTTGCTTTTCAGAAGGACGCATGCTGTTTC

>NM\_002838-Human-286HUMLC01\_3chr1+195339379195340079hchr1\_00752  
tgctaaaactgtcatattgctgagtttgaatgccctaattgtaaatgatactgggttgccaaaaataaccagattag  
gtttttcattcatttggccgtctcagtaagtcaaatattgatacttctactaagtcatcttccaacacccatttgt  
tatactatgctgaatctgtttgcatctcttaagtaagaaaattattgatttttggggatttaatttaaaaaaa  
tgtaatggatactgtaaggagcattattggatggttataaacatcttcttgatgggaaaatcttttaaaaggctt  
tctaactggtgtaattacttgaattaaggaagtgcatttactgacttagaacaacttttacttctgca  
aagaggacccttacagatattttggagaagttagtaaaaccgaatctgacatcatcacctagcagttcatgcagctagca  
agtgtttgtcttaggtaACAGAGGAGGAAATTGTTCTCGTCTGATAAGACAACAGTGGAGAGTATGCATTTATT  
TA

TTTACTTTTACATTTTGGATTTCGTTTTTACAGAGAAAAACTTCTACAGAGATAACAATTATTTTGCTTTTCAG  
AAGGACG  
CATGCTGTTTCTTAGGGACACGGCTGACTTCCAGATATGACCATGTATTTGTGGCTTAAA

>NM\_002838-Human-287HUMLC A01\_4chr1+195339380195340080hchr1\_00752  
gctaaaaactgcatattgctgagtttgaatgccctaattgtaaatgatactgggttgcacaaaataaccagattagtag  
tttttcattcatttggccgtctcagtaagtcaaatattgatacttttactaagtcattcttgcacacccattttgtt  
atacttatgctgaatctgtttgctatctcttaagtaagaaaattattgattatgttggggatttaattaaaaaaat  
ggtaatggatactgtaaaggagcattatttggatggttaaaaacatcttcttgcagggaaaatctttaaaaggctt  
ctaacttgggtgaattactgaattaaggaagtcaatgccattctactgactagaacaactttttgacttctgcaa  
agaggaccctacagatatttggagaagtagtaaaaccgaatctgacatcatcacctagcagttcatgcagctagcaa  
gtggtttgttcttagggtaaCAGAGGAGGAAATTGTTCTCGTCTGATAAGACAACAGTGGAGAGTATGCATTTATTT  
AT  
TTACTTTTACATTTTGGATTTCGTTTTTACAGAGAAAAACTTCTACAGAGATAACAATTATTTTGCTTTTCAGA  
AGGACGC  
ATGCTGTTTCTTAGGGACACGGCTGACTTCCAGATATGACCATGTATTTGTGGCTTAAAC

>NM\_002838-Human-288HUMLC A01\_5chr1+195339381195340081hchr1\_00752  
ctaaaactgcatattgctgagtttgaatgccctaattgtaaatgatactgggttgcacaaaataaccagattagtagt  
tttttcattcatttggccgtctcagtaagtcaaatattgatacttttactaagtcattcttgcacacccattttgta  
tacttatgctgaatctgtttgctatctcttaagtaagaaaattattgattatgttggggatttaattaaaaaaatg  
gtaatggatactgtaaaggagcattatttggatggttaaaaacatcttcttgcagggaaaatctttaaaaggctt  
taacttgggtgaattactgaattaaggaagtcaatgccattctactgactagaacaactttttgacttctgcaaa  
gaggaccctacagatatttggagaagtagtaaaaccgaatctgacatcatcacctagcagttcatgcagctagcaa  
tggtttgttcttagggtaaAGAGGAGGAAATTGTTCTCGTCTGATAAGACAACAGTGGAGAGTATGCATTTATTTAT  
T  
TACTTTTACATTTTGGATTTCGTTTTTACAGAGAAAAACTTCTACAGAGATAACAATTATTTTGCTTTTCAGAA  
GGACGCA  
TGCTGTTTCTTAGGGACACGGCTGACTTCCAGATATGACCATGTATTTGTGGCTTAAACT

>NM\_004560-Human-289hchr9\_P022515chr9-9179179891792498hchr9\_00134  
ttgttttctgaacatttcttttgaacttctcttctctctcctcaccgctggtgctctggggctgggtggc  
tctcagatttgcgggtgcagctgcagcctggagttactgatttgacatagatccccgggtgctcggcccgaa  
gtcgggggaccgctctgggcccctctcctgcgtgggagaccgcccgaactcggctgacgccccaggcggccact  
ttgtttcaagcgttccgagggcagggcccagggcgggcgagggagcaggtccggggccccagctgcagccccagctc  
ctgggtcccggcccggcggcgttccccggcagggggcgccggcgcaagcctcgtctgcccacggggcgggcg  
agcggggaccctgcctcctgcgctcggcgggtccggcccgctcgtctgctggcgccggcgaggcggccagcc  
cgcgccaaggaactcccaGCCAGCCCTTGCCGTGGCCGAGCCGAGCGGCGCATCCGGGCCGGAGAAGAGGACGAC  
GA  
CGAGGTCCTCGAAGTGGACCCGTTTGC GAAGCGCCAGGGAGAAGGAGGAGCGGACGCATCGTAGAAAGGGGTG  
GTGGCGC  
CCGACCCCGCGCCCCGGCCGAAGCTCTGAGGGCTTCCCGGCCCCCACTGCCTGCGGCAT

>NM\_004560-Human-290hchr9\_P022521chr9-9179125691791956hchr9\_00134  
cggagaagaggacgacgacgaggtctcgaagtggaccgttgcgaagcggcaggaggaaggaggagcggacgcatcgt  
agaaaggggtggtggcggccgaccccgccccggcccgaagctctgagggttccggccccactgctcggcattg  
cccggggctcggcgtcccggcgccgctgctgctgcatccggcctctggggcgccggcgcttctgctcagtg  
tcccggacttcaggtaggatctggcgttccggcttgcgagagcggtagctcacggctcgttggccagccttccggc  
gccactatgctcccggcgtcggcggcggccatgctcctgaacgagggggcgccaggcagggccattcgcattcggcc  
gacggcgtcccggcccgaacccggacccctcgggtggttacaataagccgctctggggagcctaagtgttcc  
agagtctggggcgggcggcGGCGGCTGGGAGCCTCTCGGTGGCGCTTCCCGAGGGTCCGAGTGGGAGTGGGAGTGT  
GA

ATGTGAGTACCCGCCCTGGGCCGGGACCCGAGTCCGCAGATGTGCCCGAGGGTCCCAGGACCCGGGCTTCT  
CCCCGA  
GGTCTTCCTCCTTCAAGGGCACACGGCCCCGAGTGTCCCCCGTCTGTCTCGGAGCGTCCC

>NM\_002964-Human-291EP26025chr1-150176423150177123hchr1\_01376  
ctcatgactaaaagccatcagccaggacacgtgttctcaacccttttgcggtcttggaccctttaaactctgacagaa  
gcatgagggaatgttctcactgagtgatgactcaaaatgatgattcaactcaattcagtttcagggatgatggc  
ctgaccaccaatgcaggggattagcaatcgcaatagtgagagggcatgggagtggaatctggctggatcaagcaagt  
gatgccagcagcccagaaaaagagccccctacctgcttttctctctgggactattgccagcaaatgcctcctctt  
tccgcttctctacctccccacccaaaatttctctgacagtgattgccacattcacctggtgagaaaccagagac  
ttagcaactctggcagggagaagctgtctctgatggcctgaagctgtgggcagctggccaagcctaaccgtataaaaa  
ggagctgcctctcagccctgCATGTCTCTTGTGACGTGTCTTTCAGAAGACCTGGTAAGTGGGACTGTCTGGGTGGC  
CC  
CGACTTTGGGCTTCTCTTGGGGAGGGTCAGGGAAGTGGAGCAGCCTTCCTGAGAGAGGAGAGAGAAAGCTCA  
GGAGGT  
CTGGAGCAAAGATACTCCTGGAGGTGGGGAGTGAGGCAGGGATAAGGAAGGAGAGTATCC

>NM\_002964-Human-292DBTSS:NM\_002964chr1-150176422150177122hchr1\_01376  
tcatgactaaaagccatcagccaggacacgtgttctcaacccttttgcggtcttggaccctttaaactctgacagaa  
ccatggaggaatgttctcactgagtgatgactcaaaatgatgattcaactcaattcagtttcagggatgatggc  
tgaccaccaatgcaggggattagcaatcgcaatagtgagagggcatgggagtggaatctggctggatcaagcaagt  
atgccagcagcccagaaaaagagccccctacctgcttttctctctgggactattgccagcaaatgcctcctctt  
ccgcttctctacctccccacccaaaatttctctgacagtgattgccacattcacctggtgagaaaccagagact  
gtagcaactctggcagggagaagctgtctctgatggcctgaagctgtgggcagctggccaagcctaaccgtataaaaa  
gagctgcctctcagccctgCATGTCTCTTGTGACGTGTCTTTCAGAAGACCTGGTAAGTGGGACTGTCTGGGTGGCC  
C  
GCACTTTGGGCTTCTCTTGGGGAGGGTCAGGGAAGTGGAGCAGCCTTCCTGAGAGAGGAGAGAGAAAGCTCAG  
GGAGGT  
TGGAGCAAAGATACTCCTGGAGGTGGGGAGTGAGGCAGGGATAAGGAAGGAGAGTATCCT

>NM\_002964-Human-293hchr1\_P038990chr1-150180890150181590hchr1\_01376  
gagcagcctcgttggctcactcaccaccacacaggtgtagcacaggggtgaggtaggggtgaaactaacatg  
ccgctccgacagcatcctgctctgaaagagagcccaagaatcagtgacaaggggtgggctgagcctgggaagagacc  
aggatcgggagcaggtgattcttagcagaggggaacaacagtagaaaatcataaagtatgtctaggagcaacagaaatt  
ttgctggaaattagttcatggagaaaacagtaggaagtcagcttgaaatgggtgggttaggaccagagctggaagtc  
cctgaaaactgagcattggaattggactttatccttttggaaggatcctagtgttaagtgtgggaagggcgag  
ggcctgggaccagctctgtcttaggaaactagtgtaggggttgggtggaggaagacagatcagacctgcacagc  
ctggctagaggtgtgacgaGAGGTAACAGCTTCATGGGACGGAAGGGAGGGAGGGCGGCATCAGAAAAGGCAGA  
ACA  
TCAAGGTCCAGACCTGGGCGCAGACTGAGGGAGAGGAGGATCCAGAATGAGGTGGAGGTTTCAGGTGCTGGCG  
ATTGGCA  
TGGGACCTCGGTGCCTGGGTGGGAGCCAGTCTGCAGGGAATATTGTGTGCTGGGTTTGA

>NM\_002965-Human-294EP26026chr1+150142903150143603hchr1\_00431  
aaccttctaaccctaatctcacctatgaatctaagaacccaaccctcgcctcctaagtatcacagagccaggca  
agcatgggtgagagctcagaccatcctgttgactaaaaggaaggggcagactgccatggggggcagccgagagggt  
aggccccataggtcctcagcctgctcaacctcaaaggggatgggggctgagtggtgccagaggagcagcagctcgc  
tcggggagagtagggccttaggatagaagggaatgaactaacaaccagcttctcccaaacagtttcaggccagggc  
tgggaattcacaaaaagcagaaggcgtctgtgaacattcctgccccagcccccttctggcagcattacca  
cactgctacctgtgaagcaatctccggagacagggccaagggccaagtgccccagtcaggagctgcctataaatgccc  
gagcctgcacagctctggcaAACACTCTGTGTGGCTCCTCGGCTTTGGTAAGTGGAGCTGCCAGCTTCCCAGGCAGAA  
GC

CTGCCTGCCGATTCTTTCTTTCCCTGACCCAACCTCCTTCCAAATCCTCCTCCTAGAACCCCTCCTTGGTT  
GGCCC  
TGCCTACTTTAAAGCTTCTTTACATTTTCTTAGGTCATGTTCCCCTGGGGCCTCCTGCC

>NM\_002965-Human-295DBTSS:NM\_002965chr1+150142902150143602hchr1\_00431  
gaaccttctaaccctaacctcacctatgaatctaagaaccaaccctcgccatcctaagtatcacagagccaggc  
aagcatgggtgagagctcagaccatcctgttgactaaaaggaaggggcagactgccatggggggcagccgagagggt  
caggcccataggtcctcagcctgttcaacctcaaaggggatggggggctgagtgggtccagaggagcagcaggctcg  
ctcggggagagtagggccttaggatagaaggaaatgaactaaacaaccagcttctccaaaccagtttcaggccaggg  
ctgggaatttcaaaaaagcagaaggcgctctgtgaacatttctgccccgcccagcccccttctggcagcattacc  
acactgctcacctgtgaagcaatctccggagacaggccaaagggccaagtccccagtcaggagctgcctataaatgc  
cgacctgcacagctctggcAAACTCTGTGTGGCTCCTCGGCTTTGGTAAGTGAGCTGCCAGCTTCCCAGGCAGA  
AG  
CCTGCCTGCCGATTCTTTCTTTCCCTGACCCAACCTCCTTCCAAATCCTCCTCCTAGAACCCCTCCTTGGT  
TGGCC  
CTGCCTACTTTAAAGCTTCTTTACATTTTCTTAGGTCATGTTCCCCTGGGGCCTCCTGC

>NM\_002965-Human-296HUMMRP14A\_1chr1+150142901150143601hchr1\_00431  
agaaccttctaaccctaacctcacctatgaatctaagaaccaaccctcgccatcctaagtatcacagagccagg  
caagcatgggtgagagctcagaccatcctgttgactaaaaggaaggggcagactgccatggggggcagccgagagg  
tcaggcccataggtcctcagcctgttcaacctcaaaggggatggggggctgagtgggtccagaggagcagcaggctc  
gctcggggagagtagggccttaggatagaaggaaatgaactaaacaaccagcttctccaaaccagtttcaggccagg  
gctgggaatttcaaaaaagcagaaggcgctctgtgaacatttctgccccgcccagcccccttctggcagcattac  
cacactgctcacctgtgaagcaatctccggagacaggccaaagggccaagtccccagtcaggagctgcctataaatg  
ccgacctgcacagctctggcAAACTCTGTGTGGCTCCTCGGCTTTGGTAAGTGAGCTGCCAGCTTCCCAGGCAG  
AA  
GCCTGCCTGCCGATTCTTTCTTTCCCTGACCCAACCTCCTTCCAAATCCTCCTCCTAGAACCCCTCCTTGG  
TTGGC  
CCTGCCTACTTTAAAGCTTCTTTACATTTTCTTAGGTCATGTTCCCCTGGGGCCTCCTG

>NM\_002997-Human-297EP74561chr2-2034629920346999hchr2\_00555  
gccggggtgtgtgtgtgtgtttgccgtcggtgaaggccccatgccccgggtccccgacctgcccagaaagcgt  
tccccagagagctaggagtctgcgcacctggagcgcgtcccgctccagcccagaggcgctgcacactcgcgccg  
aggactgctgccccctcagccccctcccgggctgcgctccgactccgggcccgggcagaagggggtgcgctc  
gccccaccaccaggagcagccgagctgaaagccgggaaccgcgcttgcggggaccacagctcccgaagcgcgctt  
cggccaccggaggagcgggagccaagcaggcaagaaccttaggagcgggcccgggggtggggcgttccgaagggccggga  
ggggtgctggggggcggggtcctgggggtgtgactgggctggccgggagactggcggagctgggggtggggggcc  
agttttgcaacgctaaggAAGGGCCTGTGGTTTATTATAAGGCGGAGCTCGGCGGGAGAGGTGCGGGCCGAATCC  
GA  
GCCGAGCGGAGAGGAATCCGGCAGTAGAGAGCGGACTCCAGCCGGCGGACCCTGCAGCCCTCGCCTGGGACAG  
CGGCGCG  
CTGGGCAGGCGCCAAGAGAGCATCGAGCAGCGGAACCCGCGAAGCCGGCCCGCAGCCGC

>NM\_002997-Human-298DBTSS:NM\_002997chr2-2034628320346983hchr2\_00555  
gtgtgtttgccgtcggtgaaggccccatgccccgggtccccgacctgcccagaaagcgttccccagagagctag  
gagtctgcgcacctggagcgcgtcccgctccagcccagaggcgctgcacactcgcgccgaggactgctgcccc  
ctcagccccctcccgggctgcgctccgactccgggcccgggcagaagggggtgcgctcggccccaccaccagg  
agcagcagagctgaaagccgggaaccgcgcttgcggggaccacagctcccgaagcgcgcttccggcaccggaggagc  
gggagccaagcaggcaagaaccttaggagcgggcccgggggtggggcgttccgaagggccgggaggggtggggggc  
ggggtcctgggggtgtgactgggctggccgggagactggcggagctgggggtggggggccagttttgcaacgct  
aaggaaggcctgtgggtttATTATAAGGCGGAGCTCGGCGGGAGAGGTGCGGGCCGAATCCGAGCCGAGCGGAGAGG  
AA

TCCGGCAGTAGAGAGCGGACTCCAGCCGGCGGACCCTGCAGCCCTCGCCTGGGACAGCGGCGCTGGGCAGGC  
GCCCAA  
GAGAGCATCGAGCAGCGGAACCCGCGAAGCCGGCCCCGAGCCGCGACCCGCGCAGCCTGC

>NM\_002997-Human-299hchr2\_P037768chr2-2034686420347564hchr2\_00555  
gaactgacactcccgatattttcttggtcccagctcaggccaccaagtcttgccttccgctaggaagaca  
ggggaggacgacccatctttggtctcaggccaggtgcaaggtcgtttggcaccatctctcctgctgagatgtg  
ggcagggcccgtccggttctcccctttgctctctcgccgtttccctacacccgaggcctccacagcttttgaac  
tgaggcccagggcctcgaggggatctcgaaggagcagaactgcacggtgctcctcagatcccgctgcccaggtcacc  
ggggaacaaagaagtactattttcttttagctcagatgaagagagagggcgttcttccacagaaaaacgctgagc  
aactccgccccgtcccccttttcttgagccctccgctgaggggtgagctgtttaaactaaggcccaagtctccagc  
actttgtgagtgaggaagAACGCGAGCGTACGGGAGAATCTGGGCCGGCGGGGCGCAGCGAGCCGCATCGCAGCTG  
GA  
GGACAGCCGGGGTGTGTCTGTGTGTGTTGCCCCGTCGGTTGAAGGCCCATCGCCCCGGGTCCCCGCCCTGCC  
CCAGAA  
AGCGTTCCCCAAGAGAGCTAGGAGTCTTGCACCTGGAGCGCGCTCCGCGTCCACGCCC

>NM\_002997-Human-300hchr2\_P037794chr2-2033509820335798hchr2\_00555  
cccaaaccagaagggaccagccccacctcccctgggactcctcagggacactctgccttcccgtgtctctgggcttct  
cagcagcctcagtgcttactcaatctgaattgttctttatctgagaggcaggttcccaggctagccattgttctgtacg  
tgggaggagaaaccgtgtacatctgtgactccaggaagagcaagagaatttcttctccttcttctgggatggcattgt  
tggatccacatttgacaaaaggttaaaaactttgccttgacatcttccagcctctctgttgaatcctgttccctctc  
ccagagctcccacctaccgagtggtcctagttccagagttagcccctccccacctggaagtgattatgctgtagtgtg  
agtgtcgttacccttttagccttccagaggactgttttcaaaggatattgtgcaatgacagggacactgataggagag  
atthtgaataaagttggaGCTTGTTCCTTCCCCACCTTACACACAGCTGGAGCCCTGGCCGGCTGCAGGTGTGTC  
AAAAGTGCAGTTTCTGCCTCTGTGAACTTGAGGACACTTTATTTAGCAAGTACAAGGGGGAGGATGTCCCTA  
GAAGTCC  
ATCTGGCAGAGGTGCCCCGGTCCCAGGTCCGGTGGCTACCCATTCCAGGGGACCTGGTG

>NM\_002997-Human-301hchr2\_P037799chr2-2032592920326629hchr2\_00555  
caccctgcctgcctgtctccaccagctggctcaaagggcaatgctgaggagaggaatggggctcgtgagctgcctgg  
ttaaggagagctcatgctcggaggtgaggtgaaggctgtgagctccagaaggccccagggccgctgctgacgcaggct  
catattcactaggaatagcttactactaagaaccttggaaacccctcagaaggtattgactcctgagcctctg  
tttctcatctgcaaaatgggaataataccttgacctgataagcttggagctgtaaggcagcacagagccagctgggg  
ttagctcttccatcaagctcccttcttacttccccttccctgtgggggactgggggagagaagctcctgagctgga  
gggtgtcaggaagcttccagaggaggtggctcttgagtgacctcagaagggggtgagagagtaaggaaggaggct  
gaggtcatccctggggaagtGACCTAGCGGAGGCCTGAGAGCTGCAAGGTAGGATATCTGTGTTGGAAGTGTCTGTT  
GT  
TGGAAGTGGGGCCTTTTTTTCAGGGAGGGTGGGGCCAGAGAAGTGTGTGCCCTGGGATAAGTAGGATAACC  
ACAGTAGT  
TATGCCCTAAGGGATGCCACCCACCCCTGTGGTACAGAAAAGCTTTCAGGTGGC

>NM\_152744-Human-302hchr7\_P001643chr7+31135123114212hchr7\_00282  
cttctacaatgcatatccactcctctgaacaggagcaggttgcaccagtggtgcctttggtgctagaaataaaa  
accgattgctgctgtttgcaattacgtaactggcgcgtcaccccaagcactgagctagctgggtgtagccgggagc  
ctctcggggcgccctattccgctcctggcctgggctgccgacgatctgctgctcctgctgacctgagccctccc  
actcggggcgcccgaccgctgcccggggcgaggatgaccacccccgcccgcgagccccccagggagcgcgtgccg  
aatcagcggcctgagctcccactacgggtccctagggggcgagccggcgcggaagcggccgagccagggcgcgcg  
ggccggcacaattgaggcggggcgccgacttgaacaaagcagggcctggggggcgggcctgggagcgg  
gcccgcctcctcggccaaTCAACGGCGGGCGGGCGGGCGGGCGGGCGGGCGGGCGGGCGGGCTGTGAATGG  
GG

AGCGGCGGCCGCGCAGCTGAGGGCGAGCGGACCGCGACGTGCGGGCGGGCGCACTTTCTTCTCAGCGCCGGG  
CGGGGG  
CGGCGGCGGCGGCGGCTCCTCCGCGCCCGGCGGACCCCTCGGAGCTAGCGCGGCGGGCTC

>NM\_152744-Human-303hchr7\_P001655chr7+31486793149379hchr7\_00282  
gaatggccagagattactgtcttaccaggtggagcagccccatttctctaccctcttaggactcaaatccctgg  
actcatatacaaaagaagcataggaagatgctgaaaggtggagagaagactgtggccactctagagtctggggactg  
agaaatgacaaggggtcagttccctcctactatctcccacatgtctagtacagggcactgcagaagcctccatccct  
gaaccaccagtaggcacagacagcaaaactctgagaagagcctgttcccatagccagaggacaggggaagggagggtg  
tctaacaaaacagagctttgtcagttactcactctgctccagctaaaccaagaaactgcctcctcctccaggtt  
cgagagcaggcagcatgcttcggttcccaccagaggtgaaggcatgctgagcagagagtaattcttcatatcctg  
cctggcagaagcaggtggtaCTTCAATTCCCCGTGTCAGGTGGTGTGACAGCGCCTAGTGGGGAGCTGATCTTCCACC  
CT  
CTGCCTGGTAGGAGCAGGTGATGCTCTGACTTCTCTGCCAGGGTAGTGTGACGAAGGCCAGGTTAGGGCCAT  
ATCCAGC  
CCCCACCAGCCACAATGAGGTGGTGTAGCAGGGGGCTAATTACCATTACACTTGACCTC

>NM\_152744-Human-304hchr7\_P001660chr7+37322603732960hchr7\_00282  
tactgtcaggtcaggtcagaaaagttgtgtcctgccctacaccgtcaagtgcagacagatgacaattggaggg  
gaaggagaggaggtcagaggaactggagttgactcgtacctcctggtgaaactgaaagagcaccctcctggtgaaact  
gaaagatagacaatatccataatgctcagggcattgacaaaatcttaccaggttttgtgctccatagaatctatttca  
atggagcaccggctcttagagcgttaagattctgctttattaactgactccatgttctactgggcccctgtggagt  
agttaacagctgttagctgaaagaactatgggttttgggaactgtaaggtgtaattaattcattaggacctgctac  
atgtcagaggctcgtgagacaccgggctcactcatacctcacgtctcagacacagactggacctcagggaggtcaca  
tccctctgaggaagagaccaGAAAACACCAATCAGATGTGACCAGTGGCACTGGCCACTAGAGTAAGCACCTGGGCT  
CT  
GGGGTCACAGCAGAGGGGGCACCACCAGCTCTGGGAAGGCTTTAGGGAGTGGATGGCAATTAGAACTTTCAGG  
ATGAAAG  
GATGTGGTTCAGAGGACTGGGGGAGAGGGCAGCACAGACAGACGAAGCCACGTGCAGGGG

>NM\_152744-Human-305hchr7\_P001681chr7+39262173926917hchr7\_00282  
gggtcatccagacctgcaggccccaccgacgtggctccaaccagcgtcacggtccgtactgccagtgcagaccagcctg  
cggcttcgctgggtggtgagtggggggtgagaagggaggtggaggcacacgggtcctgagtgagccagggcacactaa  
tccagggcttaggagtttctagtcacgcttctcctagtcaaaactaatctcatcgtcaaacaaaaagattgcat  
ttacaattagtgttgatctcagggcagccaggagatctgattaattagtagcattactcactctcttctggaactga  
ggaatattcctggggcaggaagctgggggtgctcacaccagaactctaagcttaagctaggtcaacatggaacca  
atactcaatattgtaagagagccagcctgatatttaacagaacatttcccacaaaattaagccaaaatgtattaa  
gaaattatatgcagcaaaagTACTGACAGGGTTTCATTTAATTCACAGAACAAAAGTTTCAGGGAAGAATAAAGTA  
GAT  
CCTTCTAAGACTATTTCCCCCAGGAACACCTCCTCCACGGAGTTGGCCTCACAGGGCAGGCCATCCCTTACAA  
CCCGTG  
AGGGTGGCAGTTCTGAGATGTCAGCTCATCGGACTCCTCGTTCTTCTAGCCCCTGCC

>NM\_152744-Human-306hchr7\_P001691chr7+39879733988673hchr7\_00282  
gcggggctccacgcaccagtcgctgggagcagctcctatgctcctatgctcacacagctgacccagctacag  
cgccaggtgatgtgatgaatgtgaagcgggaaattgcagcactgggtctgactggtggcacacccaaaggtg  
gcccttctgaccaccagacagttggcatctcccctgggtctgctgcaaaatcaaaacagcacagtagaagggccccggg  
atgggctgggcttacgcacctggctcgcagctctcccctgaggtggttctgctcggctcctcagccgggctcctcgtg  
tgagcatgagtcagctgcacctgccccggggtagccgggagaaaaggtgctcctcactcagtgtaagttgtgcaaaa  
actagcatgttctactgaatcagagtggtaagcacccccctgtccgggactgggggtgccttgtgtttacgaggagg  
tggcgagccccgcaactgGAGCTGGTGGAAAGCTTGGGCGGTAGCGGGGTCTTTATTGCCCCGGGAGGCGCAGCG  
TG

GGAAGTGGCTGGCATCCAGTAAGGCACCTGTCTCCCTTGTTCCTGCCGCACATCACCTGCCATGGCCGTGTCC  
CTGCCGT  
GCTAACACCTTTCTGCTTTGCTTACCCCAATAGCCCAAAGCAGCTTCAAGACGGTGAAC

>NM\_152744-Human-307hchr7\_P001697chr7+40171374017837hchr7\_00282  
ttaaattcctccagtttagtttgattgaattgtttttgtgtgattctgctgtttaatggggcggtaaataagaatt  
ctgataatgaggctgagcatctgtcacaacaacctgggtgtgggctattaacattccattaacggcaggggtgggcagtga  
taatacggaaaccacagttagaacaaaataatagttgggtgcaggctgagtggtgtaataactattttattctgc  
gctgggggagagagcagaaagtggggagggggtgatggggaaggggcgagtcctgaggtcagtcctccaagaaggcc  
tctccagagagccgggtgtgggcatctcctcggacagcactgtttatcgtctccatcagtggtccgtaagacac  
tcagcaaaaggctgactcctgggcccagccccggcgaggcggagaggagtgctcggtggcctctgctccggga  
gccagggcccctgcacagctGCCCTGGAGCTCCCCAGGGCCCAGCTCATGGACAGCCGGAGAGCCCCAGTGGGAGGA  
GG  
GAGTAGCAGAGAATAGGCCGTCAAGAGAAAGTGCGCAGCGTGGAATTCAAAGATAGTGTGAAGCTGGCATGG  
GGCAGACA  
GGACGGAGGCGTTCTGGAACGCAGGCGTGTGCTCCCAACTGCCTAAATGGCTGTGTGGTG

>NM\_152744-Human-308hchr7\_P001701chr7+40204974021197hchr7\_00282  
taggagttgggggtttgtgtctccatagctcggagcagggggtggacacggggcggttcccttctctcagaagatgg  
gggagagggagagggccaaaatcaaacaccaacagagctaggtctgcaaggaaaggcacatcagggcagctgaagggc  
agcttcccttccgctcacaactatctcaacagcgtttgttaacgaggcaatgctcactctaggtgagcaaca  
ggaaaatgtaaacatcgtctccaaacaacattagcagccaggggtccccgtccatacacagtagcctcagcttctccc  
tgattctccaggagggagcctttccaccttcccaccagcagctcgccccagaactcagctcaccctcgtcttga  
ccttactcagtgggccccgcttactggaaggcttcccaggaccacccccaccttctgctgttctaacagatttac  
tactgggaggcagacagccaGAACGAAACGGAGAAAATGAAGGTCTCTTCTCCCCGAGCCCGTGGTGAGGCTGAA  
GAA  
CCTGACCAGCCATACCAAGTACCTGGTCAGCATATCAGCCTTCAACGCCGCCGGAGATGGACCTAAGAGTGAC  
CCCCAGC  
AGGGGGCGACCCACCAGGCCGGTAGGAGGAAGGCGGGTTTCCTTTGGGCAGGCCTCCTTG

>NM\_152744-Human-309hchr7\_P001706chr7+40532684053968hchr7\_00282  
ctgctgcactccttatctcccactcctcgtcgaattcctttctgatcttggttccacctgctcacctccatcatcc  
caaatcccctctcccaggaagcccatcttctttctgctctgttcttccgtaaacacagagcattaaggttaa  
agcacgtcaaagggggccaggtcccagcagagaggagcctcttggggttagaaatgccaacgcacttagcaataact  
gccaagcccctggtatgtgtgtaggcgctgtcctgggggctggcgggacactggggagtgatggacttaagtctgtac  
ctcaaagagcaaatatgtacatggcctgagaaacagaggtcactttatgtgtcagggaggtcgctctggtctcaggg  
cgtttagctgtgatcgcaggaaggggagagaaacccgggaaatactgggagaaggagctccagcaagaggagagcc  
ccagggggagaaacccgtgtTAGGGAGGGCTGAGGGCTGGAAGATGACGCGGGGGTTTTGCAGGGTGGACAGACCAG  
GCC  
AAGCTTGGGGGCGAGTTTGGAGGCCTTGGTCTTTTCTGCAGAAATGAGCCGGGAAAACCCAGTGCAATTTATTTTT  
TATGTTG  
TTTCGGTTTTTTCAGAACTTTATTTTTATTTCATTTGATCTGTTAATATATTTTTAGAATGTGT

>NM\_152744-Human-310hchr7\_P001728chr7+40766164077316hchr7\_00282  
tcctgagtgaggaggccgcgtagacctctcctgagtgaggaggccgcgtagacctctcctgagtgaggaggccgcgtaga  
cctctcctgagtgaggaggccgcgtagacctctcctgagtgaggaggccgcgtagacctctcctgagtgaggaggccgc  
gtagacctctcctgagtgaggaggccgcgtagacctctcctgagtgaggaggccgcgtagacctctcctgagtgaggag  
gcccgcgtagacctctcctgagtgaggaggccgcgtagacctctcctgagtgaggaggccgcgtagacctctcctgagtg  
ggggaggccgcgtagacctctcctgagtgaggaggccgcgtagacctctcctgagtgaggaggccgcgtagacctctcc  
tgagtgagggtggccgtagaactctcctgagtgaggaggccgcgtagacctctcctgagtgaggaggccgcgtaga  
cctctcctgagtgaggaggcCGCGTAGACCTCTCCTGAGTGGGGAGGCCCGTAGACCTCTCCTGAGTGGGGAGGCCG  
TG

TAGACCTCTCTGAGTGAGGGAGGCCGCTAGATCTCTCTGAGTGAGGAGGCCGTGTAGATCTCTCTGAGT  
GAGGGAG  
GCCGTGTGGACCTCTCTGGGGTAAGGAAGGCCGCTGGACCTCTCTGGGGTAAGGAAG

>NM\_152744-Human-311hchr7\_P001729chr7+40778264078526hchr7\_00282  
tctctgtgtggagggtgggagggcctggcattgggttggggtggggagagggctggagaccgacacacgcccctggg  
gaggtgccccaccgcccaggcctctgcccagcacgctccgggcctgcgcctgcctgactcacaccttctctcccg  
ctccccgaggccacggactctgactacgaggacgctgcccgaagcactccttctgtaaccactacatgagcgacccca  
cctactacaactcatggaagcgcagggcccagggcgcgcacctgcgccacaggtacgaggcggtggcgggctccgag  
gcgggcgcgcagctgcacccggctcaccacgcagagcgcggcgctctacacccccctggccccggcgcgcgaac  
tccgctcaccggcttctctcctctgtgtgagcaaaagcgcctccctcagggcggaacggaggcaacttccggag  
tctatTTTTgtaagacaatCAACTCCAATAACTGAGCTGAAGTTTTTTGTTTAAAAAGAAAAAATCTGATAAGTGATG  
A  
TTTTACCTACTTGTGGACACTAGATTTCAATTAGGAAGGTTTTTTTTAAACGGCTTTTTGTAACCTCGCTGCAG  
GAAGCAG  
GTTTGTCTTTTTCTTTTTCTTTTTTAAGAGAAGGTGTATTTCACTGGTGAATGGCTTGG

>NM\_003064-Human-312DBTSS:NM\_003064chr20-4331641943317119hchr20\_00619  
gagctgaactttgagaaagaaactgcattgagtaatcagcagagtttcaaatgcctgagagtccagtaatgtgagaat  
cagaattagcaatgtgagaatagaatgtattgcacaaagtctcagcagggagtctgtgtctggttttagtccaggtccg  
ggtagcacctttgcaattgaccacttcttccctctctccacctataaggctaattggcctgggatcttctgatgttaggg  
ctcagatggacactgagatggcctttaaataccaacttcccaggccaatcttctcccttcttctctgatagttgct  
gtgttggcctcatagccttacctggcataggaaagataaacaatctccttgggtgcaggatttctggctctggctacgt  
ttcctgcttatgcaatagtagctgggagaggccgaaagaattctggggggccacaccactggtgaaagaataaatag  
gaggttggcattggccatcAGAGTCACTCCTGCCTTACCATGAAGTCCAGCGGCCTCTTCCCCTTCTGGTGCTGCT  
T  
GCCCTGGGAACCTCTGGCACCTTGGGCTGTGGAAGGCTCTGGAAAGTGTAAGTTGGAGTCACTCTGGTCTAATC  
TGGGCTG  
CAGGGTCAGAGGTGGGGTCTCCTTGTGGTGTGGGTGTGTCCCCTTCTGTAGGCTCTGATC

>NM\_003064-Human-313HSSLIPG\_1chr20-4331668643317386hchr20\_00619  
ctcttagtgggaagggatactattcattgtcttttcttcagagtccttcatgcccttaatttcataaccctctga  
gaagggctgacttgttagtattcatttcacagctgagacaactgagctccagagagatttgggagagcggagctc  
ttctcagcttcttctgtgagtgcttttctgtgacggcacagaacaggcactggggatataacgggtgaaatattc  
agggaactaagatcagttggtgaacgagctgaactttgagaaagaaactgcattgagtaatcagcagagttcaca  
tgctgagagtcagtaatgtgagaatcagaattagcaatgtgagaatagaatgtattgcacaaagtctcagcagggag  
ctgtgtggttttagtccaggtccgggtagcaccttgaattgaccacttcttccctctctccacctataaggctaa  
tggcctgggatcttctgatgTTTAGGGCTCAGATGGACACTGAGATGGCCTCTTAAATCAACCAACTTCCCAGGCCAAT  
C  
TCTTCCCCTTCTTTTTCTGATAGTTGCTGTGTTGGCCTCATAGCCTTACCTGGCATAGGAAAGATAAACAATCT  
CCTTGGT  
GTCAGGATTTCTGGTCTCTGGCTACGTTTCTGCTTATGCAATAGTAGCTGGGAGAGGCC

>NM\_003064-Human-314HSSLIPG\_2chr20-4331643943317139hchr20\_00619  
taagtatcagttggtgaacgagctgaactttgagaaagaaactgcattgagtaatcagcagagtttcaaatgcctga  
gagtcagtaatgtgagaatcagaattagcaatgtgagaatagaatgtattgcacaaagtctcagcagggagtctgtg  
tggttttagtccaggtccgggtagcaccttgaattgaccacttcttccctctctccacctataaggctaattggcctg  
ggactcttgatggttagggctcagatggacactgagatggcctttaaataccaacttcccaggccaatcttctcc  
ttctttctgatagttgctgtgttggcctcatagccttacctggcataggaaagataaacaatctccttgggtcagga  
ttctgtctctggctacgtttctgcttatgcaatagtagctgggagaggccgaaagaattctggggggccacacca  
ctgtgaaagaataaatagTGGGTTTGGCATTGGCCATCAGAGTCACTCCTGCCTTACCATGAAGTCCAGCGGCCT  
CT



TCCCCTTCCTGGTGTGCTTGGCCTGGAACTCTGGCACCTTGGGCTGTGGAAGGCTCTGGAAGTGTAAGTT  
GGAGTCA  
CTCTGGTCTAATCTGGGCTGCAGGGTCAGAGGTGGGGTCTCCTTGTGGTGTGGGTGTGTC

>NM\_003064-Human-315HSSLIPG\_3chr20-4331641243317112hchr20\_00619  
acttttgagaaagaaactgcattgagtaatcagcagagttcacaatgcctgagagtcagtaatgtgagaatcagaatt  
agcaatgtgagaatagaatgtattgcacaaagtctcagcagggagtctgtgtctggttttagttccaggctccgggtagca  
cctttgcaattgaccacttctccctctccacctataaggctaattggcctgggatcttgatgtttagggtcagat  
ggacctgagatggcctttaaacaaccaactcccaggccaatctctccctttctttctgatagttgctgtgttg  
cctcatagcctacctggcataggaagataaacaatctcctgggtgcaggattctggctctggctacgtttcctgc  
ttatgcaatagtagctgggagaggccgaagaattctggggccacccactggtgaaagaataaatgtaggttt  
ggcattggccatcagagtcaCTCCTGCCTTCACCATGAAGTCCAGCGGCCTCTTCCCCTTCTGGTGTGCTTGGCCTG  
G  
GAACTCTGGCACCTTGGGCTGTGGAAGGCTCTGGAAGTGTAAGTTGGAGTCACTCTGGTCTAATCTGGGCTG  
CAGGGTC  
AGAGGTGGGGTCTCCTTGTGGTGTGGGTGTGTCCCCTTCTGTAGGCTCTGATCCCTCAGC

>NM\_003068-Human-316DBTSS:NM\_003068chr8-4999634149997041hchr8\_00439  
tcccgttcccccttcttttcaaaagccaagaggaattatttggctttgtgcaaggcaaacctctccagatgccac  
ttcaaatataggctctcattaacaccagaggctggcctgggtgtggtgcagggcggccttctctctggcggacact  
gtgtccccgcgctggcgtgcaccacatctggaagccagggcgggcagggcagagaccggctctgcgccctccta  
gctcccagagagcgtggatcggggcggggctcaccgagcaggttacctcttgaataactaaacacttttttcc  
tctccactgaaatctcaaaaaacagcccatttgaaccagaataatttagtctgacaacagattcttctctgttcacag  
ctgtcccagaggagagctgaaatctgaacctctcagctgtgattggatctttctgcaaaagagaggaaaaaaaacc  
ctcccagcaaaacgggtcAGTTCGTAAAGGAGCCGGGTGACTTCAGAGGCGCCGGCCCGTCCGTCTGCCGCACCTG  
AG  
CACGGCCCCGTGCCGAGCCTGGCCCCGCGATGCTGTAGGGACCGCCGTGTCTCCC GCCGACCGTTATCCG  
CGCCGG  
GCGCCCGCCAGACCCGCTGGCAAGATGCCGCGTCTCCTTCTGGTCAAGAAGCATTTC AAC

>NM\_003068-Human-317hchr8\_P019482chr8-4999695849997658hchr8\_00439  
aagtatttttagattgaagaccatacacaataaaggtgttttgcagtactagactgggttctaaaactttaatca  
atctatattcataataatcttcaatttcttttagcattatacaggaactggtagatactgagatggattttaa  
ggctttatactgatgaaaatgaccacataaaagcaggggaatattagaaataaaaataattgtctctaaagaccata  
caaccttttccataaaaaaaagatgactgtaatacatgaaaagataagatcttctgcaaaagtgtgagagaaatg  
tccggtggttcaaatgacagttacctctgccccctctctgccagagttcttttatcttgcaatcttccagttc  
ttccgatcagcctgccttagagggtctaaaagcatttcttcaagccaccatagctaacacggtgacatgagtacttaa  
ttgacacgcccgcgctgcCCCTGGCTTCGCGGAAGCCCTGAGTAGCGCAGCGCCCTCGCCGCACGCAAGGCTGCAGT  
C  
CCGCTCCAGGCCAGAGTCCCAGGAGAGCGTCTCCGCGCTCACAGGCGCCTTTGTCTTCCCGCTTCCCCCTTCTC  
TTTTT  
AAAAGCCAAGAGGTAATTTATTTGGTCTTTGTGCAAGGCAAACCTCTCCAGATGCCACTTC

>NM\_003107-Human-318hchr6\_P002001chr6+2170195121702651hchr6\_00657  
ttggggtctgctctaagctgcagcaagaaactgtgtgtgaggggaagaggcctgttctgctgtcgggtctctagtct  
tgacgctcttaagagtctgactggaggaactctgaccattaccagctccttctgcaagggaggggaaacata  
cattattcatgccagtctgtgcatgaggcttttggcttctactctgcaaaaaataattgaccaactccttagt  
gccgattccgccacagagagctctggagccacagctcttttggcttctactctgcaaaaaataattgaccaactccttagt  
tatgtcgttctctgagctaccgagagcgtctgactggaatcaactgcttcagggaaaaagaaaaaaagaaaaaa  
gactgctgggagggccgcgagaaactgactggaagcttcagcaaccagcattcgagaaactcctctactttagca  
cgtctccagactcagccgaGAGACAGCAAACCTGCAGCGCGGTGAGAGAGCGAGAGAGAGAGAGAGACTCTCC  
AGC

CTGGGAACTATAACTCCTCTGCGAGAGGCGGAGAACTCCTTCCCAAATCTTTTGGGGACTTTTCTCTCTTTAC  
CCACCT  
CCGCCCTGCGAGGAGTTGAGGGGCCAGTTCGGCCGCCGCGCGCTTCCCGTTCGGCG

>NM\_003107-Human-319chr6\_P002006chr6+2170145021702150chr6\_00657  
gaacagatttgcaccagaggctgattctttattccaatgctgaaaagaactaataaaaataactctggcttttaagc  
agaaagcttcatttacagttttcaccttaccgcccccgtccaagccccttggtatctaacataatggttagaata  
catttccgtctctcccctaataatttcatgcattaacatccttccacactatacacacgcgcgacacacac  
acgcgcgcgcacacacagcaaaaggaaaaagaggcagcagaaatctcagctgtactttagccctttaaaaagttt  
gctctgtaaattggaatgaggtcagatttggagcttctcattgcacgcggagattattattgcatcgggtccaagccaa  
tgggaagcccgggggaggggttggcatgaggaagcgttggttacagcagctgattggctgcagcaagactgtgaaagg  
ataaagaggcgcgagggcgaATTGGGGTCTGCTCTAAGCTGCAGCAAGAGAACTGTGTGTGAGGGGAAGAGGCCTG  
TTT  
CGCTGTCGGGTCTCTAGTTCTTGCACGCTCTTAAAGAGTCTGCACTGGAGGAACTCCTGCCATTACCAGCTCCC  
TTCTTG  
CAGAAGGGAGGGGAAACATACATTTATTCATGCCAGTCTGTTGCATGCAGGCTTTTTTG

>NM\_000582-Human-320EP73082chr4+8925354689254246chr4\_00005  
gcatactcgaatcacaagctaagcttgagtagtaaaaggacagaggcaagtttctgaactccttcagggctgaacaa  
tagccttctggctcttcaataagtacaatcacaagcaggaagtggttcagatattacctttatgttacttaaacgaa  
agaaacaaaaatccattctatattaattttacattaatgttttccctacttttcccttttcatgggatccctaagtgc  
tcttctggatgctgaatgccatcccgtaaatgaaaaagctagttaatgatattgtacataagtaatgttttaactgta  
gattgtgtgtgctgtttttgtttttttgttttaaccacaaaaccagagggggaagtgtgggagcaggtgggctggg  
agtggcagaaaacctcatgacacaatctctccgctccctgtgttggaggatgtctgcagcagcatttaaattctgg  
gagggttgggttcagcagCAGCAGGAGGAGGCAGAGCACAGCATCGTCCGGACCAGACTCGTCTCAGGCCAGTTGC  
AG  
CCTTCTCAGCCAAACGCCGACCAAGGTACAGCTTTCAGTTTGTACTGGGTTGTGCATTTCAGCTGAATTTTCATG  
GGAAAGT  
CCAAATTCTAAGGAAAAATATTTTTAATTGTAATGCTGTAAACAGACTTAAATTTTCTA

>NM\_000582-Human-321DBTSS:NM\_000582chr4+8925354489254244chr4\_00005  
ctgcatactcgaatcacaagctaagcttgagtagtaaaaggacagaggcaagtttctgaactccttcagggctgaac  
aatagccttctggctcttcaataagtacaatcacaagcaggaagtggttcagatattacctttatgttacttaaacg  
aaagaacaaaaatccattctatattaattttacattaatgttttccctacttttcccttttcatgggatccctaagt  
gcttctctggatgctgaatgccatcccgtaaatgaaaaagctagttaatgatattgtacataagtaatgttttaactg  
tagattgtgtgtgctgtttttgtttttttgttttaaccacaaaaccagagggggaagtgtgggagcaggtgggctgg  
gcagtgccagaaaacctcatgacacaatctctccgctccctgtgttggaggatgtctgcagcagcatttaaattct  
gggagggcttgggttcagcAGCAGCAGGAGGAGGCAGAGCACAGCATCGTCCGGACCAGACTCGTCTCAGGCCAGTT  
GC  
AGCCTTCTCAGCCAAACGCCGACCAAGGTACAGCTTTCAGTTTGTACTGGGTTGTGCATTTCAGCTGAATTTCA  
TGGGGAA  
GTCCAAATTCTAAGGAAAAATATTTTTAATTGTAATGCTGTAAACAGACTTAAATTTTCTA

>NM\_000582-Human-322HSU20758\_1chr4+8925354289254242chr4\_00005  
tactgcatactcgaatcacaagctaagcttgagtagtaaaaggacagaggcaagtttctgaactccttcagggctga  
acaatagccttctggctcttcaataagtacaatcacaagcaggaagtggttcagatattacctttatgttacttaaac  
cgaagaacaaaaatccattctatattaattttacattaatgttttccctacttttcccttttcatgggatccctaa  
gtgctcttctggatgctgaatgccatcccgtaaatgaaaaagctagttaatgatattgtacataagtaatgttttaac  
tgtagattgtgtgtgctgtttttgtttttttgttttaaccacaaaaccagagggggaagtgtgggagcaggtgggct  
gggcagtgccagaaaacctcatgacacaatctctccgctccctgtgttggaggatgtctgcagcagcatttaaattct  
ctgggagggcttgggttcaGCAGCAGCAGGAGGAGGCAGAGCACAGCATCGTCCGGACCAGACTCGTCTCAGGCCAG  
TT

GCAGCCTTCTCAGCCAAACGCCGACCAAGGTACAGCTTCAGTTTGCTACTGGGTTGTGCATTTCAGCTGAATTT  
CATGGGG  
AAGTCCAAATTCTAAGGAAAAATATTTTTAATTGTAATGCTGTAAACAGACTTAAATTT

>NM\_000582-Human-323HUMOSTP\_1chr4+8925354189254241hchr4\_00005  
ctactgcatactcgaatcacaagtaagcttgagtagtaaggacagaggcaagtttctgaactccttcaggcttg  
aacaatagccttctggctctcaataagtaacatacaggcaagagtggttcagatattacctttatgttacttaa  
ccgaaagaacaaaaatccattctattaatttacattaatgttttccctacttctcccttttcatgggatcccta  
agtgtcttctctggatgctgaatgccatcccgtaaatgaaaaagctagttaatgatattgtacataagtaatgtttaa  
ctgtagattgtgtgtgctgttttgttttttttttaaccacaaaaccagagggggaagtgtgggagcagggtgggc  
tgggcagtgagcaaaaacctcatgacacaatctctccctcctgtgtgtgggaggtgtctgcagcagcattaaat  
tctgggagggcttggtgtcAGCAGCAGCAGGAGGAGGCAGAGCACAGCATCGTCGGGACCAGACTCGTCTCAGGCCAG  
T  
TGCAGCCTTCTCAGCCAAACGCCGACCAAGGTACAGCTTCAGTTTGCTACTGGGTTGTGCATTTCAGCTGAATTT  
TCATGGGG  
GAAGTCCAAATTCTAAGGAAAAATATTTTTAATTGTAATGCTGTAAACAGACTTAAATTT

>NM\_012449-Human-324hchr7\_P007867chr7+8942783989428539hchr7\_00097  
atcgcttgaaccggggctggaggttcagtgagcaagatcgccaccgactccagcctgggcaacagactgagact  
ccgtctcaaaaaataaaaaataaaaaataaagtaacgtgtgggaggggttgaagctctaaacggtctatc  
tcaaagtgtgatctgggaatgcttcatactcatgggaactgttacaatgagaatctcagacccatcccagacata  
ctgaaccgaaactgtgggagcagcccaacaatcggtgttttaataagccccgggtaacttatacacgctaaagt  
tgagaaccactgcttagagaaatgcacaacgttcttagtgagattaacaaaaggcagggggtggagggcgcgaa  
acggacctcaggtgcagggcagacggcattgagaggaaactgggagaggccggagtgcgactggggagcttagcctc  
caaggacgttccggaaccctGCGGACGCGGGGCGCCAGCAGGTGGCGCTGGACGCGCAACGGACAAGGAGGCGGGGCC  
TG  
CAGCTGGCTTGGAGGCTCCGCGCTCTGGAGGCTCAGGCGCCGCTGGGGCCCGCACCTCTGGGCAGCAGCGGCA  
GCCGAG  
ACTCACGGTCAAGCTAAGGCGAAGAGTGGGTGAGTCCCTTGAATCGTTCTCACTGGCCGT

>NM\_003807-Human-325hchr19\_P90233chr19-66213986622098hchr19\_00310  
ccacatatgcacgcacattacatgccagcacatgtatgatacacagggcatgcgctgcacatgtgtacatgatacac  
ttgatgcacacaactgaatacacacattcacatgcacacactgcacacatatgatgcagacaagcacacacaga  
gcacacatccactccttattccactctgtgttttactgcactgtcacatcaaaacacaacagaaggccgggcatg  
gtgcgctcactgttgaatcccagcacttgggaggtgaggtgggtggatcgttgaggtcaggagttcgagaccagc  
ctgaccgacatggtgaaaacctctactaaaatacaaaaagcagccaggcgtgtggcacgctgtaatccccg  
ctactgggaggtgagggcaggagaattgctgaaccaggaggtggaggttagtaagctgagatcgccactgcac  
tccagcctgggcaacagagcGAGACTCCATCTCAAAAACAAAACAAATAAACGAACAAAAAACCCACAACGTATTA  
TTT  
TCTTGTTCACGAGTTTCTTGTCTCTCTGGCTCCACCAGAAGAGGAGCAGGGACCCTTCTTGTCTGTTGTTTATT  
GCTGCA  
TCCCCACACCGAGAGCAGAGCCTGGCATGGGCAGAAAGTCTCAGTCGATATTTGGTGG

>NM\_018965-Human-326DBTSS:NM\_018965chr6-4123863241239332hchr6\_00838  
ccagagctgtgacttaactgctccacactacaggaatgacagccctgggggatgaactaagaggtgctggatgaggg  
tcctggcctcctaaaggcagcagctgttctcaactcctgcaaggctgaaaccagaagatggcgggcattgcagctggtgga  
gggtctgaatacagctgtgagtagttagtccctgggctaggtctgcaaggaaactgagcagtgaggcctaccagc  
cccaacctctggggccaccctggctggcaccagcaggaggggtggctgtctctcagaggtctgggagactcagcctc  
ctctgacagggctgcagtgccgactcctcctcctcctgtccccaccctgcaccgctccagacccagctcctgacta  
ttgctaatcccaggagcccagttcctgtgggcagcgcctgacatgctgatcctctcttctcagttcaagggaaa  
gacgagatctgcacaaggcACTCTGCTTCTGCCCTTGGCTGGGGAAGGGTGGCATGGAGCCTCTCCGGCTGCTCATC  
TT

ACTCTTTGTCACAGGTAGGATCCCCTCCGTGCCCTGTGATGCCTTCTCTCCCTCACTTTGAGCATGTGGTTGGG  
GCGCGG  
GTGGTGGGCCCTGGGGTGAATTATGAAGGCGGTGGCAGTCCTCGCATGCCTGAGTGCCT

>NM\_018965-Human-327hchr6\_P021173chr6-4124268141243381hchr6\_00838  
ggggtttggatgtaggaaggtaggataaagtaaaagcagaacagaatcaaagaaggaactgggaaagagaagtcttaagt  
ggctgcttattagtgatggcatttgggctcttatgttttagtttggggccccagccaagggtggaatggacacca  
ccaatcacccttaagcccagttctcaggcaaggcttgcaggggctgtccaggtgggctgacaataagcctaataca  
aattggagtattccagctttgagaggcctgttctatgtcggtgttccagtcacatgcctcccagcctagcacaggg  
gctggcactggccatggtcctgaccaacacctagtgcttctcctggctgtcaagctgggtgggtgagatgggaagataa  
tggaggatctgatctgaaaggtggtgaggatgctcacttgaccgtcttgattactcctagggagaaggagaagaga  
gagtgaagtggtgtttgaGGAGAGTGATGATTTGGAACAGCTACTCTAGCCTCCAGGAGTTCTGAAGAGGATGACC  
AG  
GCAGCTGTGAGGTCTCAGTTAAAGTTAGACATCAGGAGCATGTCATGTGTGCAGTCATGCTTCTGGTTCTGAG  
GCTTTCC  
CCAGCAATGGTCACCATCATATCTAGGAACACAAAGGCTCCATGGTTCTGTAACACCATG

>NM\_018965-Human-328hchr6\_P021174chr6-4123752241238222hchr6\_00838  
gtacacaattgcttctcccgtgaggaaagcgacctttgtccccagagcactggacaaacctgggcaagaggaga  
gacggtgccaaatggagtctgttctcagcttcttagatgggtggtcagggggaaggcggggttctgaggcatggatgg  
gaggtggtcagatgggagagggccacggccatctggtctcttagttccaaaaggcaagccaccaacttcccataccta  
tctttcaagcctctgtcacagtaatggtgaagatggcaggcaagggaggaccaagagagaagtcaaagcagggggctct  
gggggctgccccagcaacaggtggtgcttaagcccctctccccgccctaaggagggttcccaaatagcagcctcat  
gtctccccaaaatatctccgagacgggtccttctgaaaggggaaacaaagccacagaatagggagctggaagttaa  
ggtcaggaaagtcggtaccaATGTGGGCGGCTGCAGAGCAAGCAAGAGTGGCGGGCAGGGAGAGCCAGCCCCAGGCC  
GA  
GAGGAGAGGTCCCAGTCCCAAATGATGGCAAAGAGATGTGCAGAACAGAACTGGAGGGGGTTTTAAGACCAA  
GTGCCTCC  
AGAATAGACCCAGAGAAGGTCAGTTACTTCTCCAAGGAGGCCAGCAAGAGCAACAGTGA

>NM\_003882-Human-329hchr8\_P008426chr8+134271985134272685hchr8\_00753  
aaaaaaaaaaaaaaaaaaaaaaaaaaaaagaaaagaaaagaaaagaaaagaaaagaaaagaaaagaaaaccagagtaggagca  
gcctgaagaaatgacagggagttgattcccactgggagccctctcaaagcccacaccccctgctgggtaacagt  
atctcctcgacatctcgcacctccatgctccccctctcactagtagtgaagacactaggcaggatgacccagctc  
ctctgtgagaattcacacctagtgtgaagtcatagcttgaactttcccttaagaactgtcagagctggggaggct  
ggccaagctcaggctggaggtggggacagaggaagaaagaaaagagagagaggcaggaaaagtttttcag  
aggaaaatgaggggttgccttaccctgacgtcagatcttcttaataaaaccccccaagggtcgcggaagaggcat  
atctggtgctcctgatgggcCGGCCAGTCTGGGCCAGCTCCCCGAGAGGTGGTTCGGATCCTCTGGGCTGCTCGGTCCG  
A  
TGCCTGTGCCACTGACGTCCAGGCATGAGGTGGTTTCTGCCCTGGACGCTGGCAGCAGTGACAGCAGCAGCCGC  
CAGCAC  
CGTCTGGCCACGGTGTGATCCTGCCTGGAGGGGCTCAGAGGGAGACCCAGCTCCCTTCTC

>NM\_001478-Human-330DBTSS:NM\_001478chr12-5631304956313749hchr12\_00338  
caggctatgacctaggcttgaagcagaactaccgcaatctggcctctctggggtcccttctcctgcaaggttga  
ccaagcggcagttcggggaataggccttcaattaccagtgatctcttgatgtctgttaataatggggggcag  
ggcggggaggaggaggagagggtgctgctcagcttctttagcaggcagagcgttattttcaggggtgtttc  
ctttatctcatcctaactcaaaactgacttgatttagcgcgccccgcctactcctccaaagccttattg  
ccatccttgctacaagctcagaacgagcaggcaatggaatggatgtcgtgggagcaggcgttgatgacagtggtt  
ggaggtaaggactgggggtgtgagcaggacctcccgcgttctccgcgccccgcagtttctccgcgcccacta  
gaaggcgggggctgcctcgcATTCCCCGCGCGGAGCCGAAGCAGCCGCAACGAGCCGGGAGCTGAGCCGCGCTGCGCT  
GC

GGTGCGAAGAGCCGGGCGGCGGCCAGAGCCCTCCCCGCGCTGCCAGTGGGACGCGGAGCCAGGGATCCCCGGCT  
TTGCCC  
CGGGGCTGGGGTGCAACAGACTCTTAACCTGGTCCTCGCGCCCCGCCAACCGCCCCGGG

>NM\_001478-Human-331L76079\_1chr12-5631305156313751hchr12\_00338  
atcaggctatgacctaagccttgaagcagaactaccccaatctggcctctctggggtcccttctcctcaaggtg  
caccaagcggcagctcggggaaataggcctcaattaccagtggtatctcttgagtgctgttaaataatggggggc  
agggcggggaggagggggagaggaggctgtgcctcagctttgtagccaggcagagcgttattttccaggggtgtt  
tcctttatcttcatcctaactcaaaactgacttgagtttagcgcgccccccctacctctcccaagccctatt  
tgcccatcctgcctacaagctcagaacgagcaggcaatggaatggatgctgtgggagcaggcgggtgagatgccagtgt  
ttggaggtaaggactgggggctgtgagcaggacctcccgcgtttgctccgcgccccagtttctccgcgcccac  
tagaaggcgcggggcgtcGCATCCCCGCGCGGAGCCGAAGCAGCCGAACGAGCCGGGAGCTGAGCCGCGCTGCG  
CT  
GCGGTGCGAAGAGCCGGGCGGCGGCCAGAGCCCTCCCCGCGCTGCCAGTGGGACGCGGAGCCAGGGATCCCCGG  
CTTTGC  
CCCGGGGCTGGGGTGCAACAGACTCTTAACCTGGTCCTCGCGCCCCGCCAACCGCCCCGG

>NM\_001478-Human-332L76079\_2chr12-5631279356313493hchr12\_00338  
acattcaactgacttgagtttagcgcgccccgcctacctctcccaaagccctatttgcctcctgcctaca  
agctcagaacgagcaggcaatggaatggatgctgtgggagcaggcgggtgagatgccagtgttgaggctaaggactgg  
gggctgtgagcaggacctcccgcgtttgctccgcgccccagtttctccgcgcccactagaaggcgcggggcg  
tcgattccccgcgaggaccgaacgagccgagcgggagctgagccgcgctgcgctgcggtgcgaagagccggg  
cggggccagagccctccccgcgctgccagtgaggcgcgggagccaggatccccggctttgccccgggctggggtgaa  
cagactcttaacttgctcctgcgccccccaaccgccccgggaggaacgcccagaaccaccaccgcgcccgcgctcc  
acaaaagccccgggagtccAAGACGGGAGGGATCGGGCGCGCTCCAGAGGCAGGAGGGTCCCCACACCCTCAGGCT  
CA  
TGCCCAGCTCCCCATCGGGCAGCCCCAGCCCCATGAGGACCCTCAGGCCGGGGCGAGAGCCCGGCACAGCCC  
GGACCG  
AAATTTTGCCGCTGCCTTAGAGCGTTAGACAGGTCAGTGCCCGGGGGTGGGTGGGGGTGG

>NM\_001478-Human-333L76079\_3chr12-5631249956313199hchr12\_00338  
gctgcgctcggtgcgaagagccgggcgggcggccagagccctccccgcgctgccagtgggacgcggagccaggatcccc  
ggctttgccccggggtggggtgcaacagactttaaacttgctcctgcgccccccaaccgccccgggaggaacgc  
ccagaaccaccaccgcccgcgctccacaaaagccccgggagtccaagacgggagggatcgggcgctccagaggcag  
gagggtccccacacctcaggctcatgccagctccccatcgggcagccccagccccatgaggacctcaggccggg  
gagagagccggcacagcccggaccgaaatgtcgctgcttagagcgttagacaggtcagtgccgggggtgggtgg  
gggtgggattggtggtgaggggagggaggaggcgggagggaggcgggagggcgcgcttcccgtccactctgtccc  
ccgcgcccgttgcgaggccACTCATCGGGTCACCTCCGCCGGGGCGCCCCGACGACGGGCATGATTCTGCATTTTT  
T  
CCTGACAGGCTAGGTGTGGAGCCGCCCTCCGCAGCCCACCCCGGCCAGGTGATGCTCAGACTGAGGAGTCCGG  
GGCGCG  
CCGCCAGGGCGGGCGGGGCTTGGGGACTGCCACTGCCCTGATAGAGCGGGGCTTTTC

>NM\_001478-Human-334hchr12\_P019128chr12-5631175656312456hchr12\_00338  
tcagcattaagatgccaggcctcggtgtgtgaggaaaccgagatgcaggagaggcggagaagaaaggaggccgggagac  
cctggggcctgggaagtgaggggaggggtaccgggaaaaccggtggcagtgcaaacctagcgcgatgtgtggagt  
gagagcgtcttgggagccggcaggagcctctgaggacgcggggccaaggccccatcccttgcctccttctcct  
cccttctactccccacctaaccacctaagtagtggtggtggcgccggccctgtgcgctctggtccttctgctcg  
cctgcgctcgtgggctcctgtacgcgagaccgggacgcgccccgctccggctaccttgcgcccgtgggccc  
ccgcaaagccccgcaggccgagctgccagatctgtcctgagccccgtacgcacacatcccggtcaggatcaagga  
gcaagtagtggggtgagtgCGACCGGGCGGCGCAGCGCAGCGCTCGCTGGGGGTGGTCTGGGGGCTTTTGT  
CC

ACTGCTGGGCTCAGATGCCTGCATTCTCCTAACGGGCTGTGTGGAGTGAAGTGGGAGGTGGAAGTGGGAGGCT  
GCTGAGG  
CTTGGGCTGGGGAAAATCTGTTCTCCCTGAACCTTGCCATGGGGATAAGGATGGGGATGG

>NM\_001478-Human-335hchr12\_P019137chr12-5630745656308156hchr12\_00338  
caggatgtgggggtggagaaggcctgaacaggtaagccacagcggggcgctgcggccaggaacggccagcctag  
gacaaagagagaaccacgaagtggggcctgggaactgtctgggtcctgcaggggtgaagcggaagaggatggggcagggg  
taccgccgaaggcaccggagcgcagaccttgacccttcgggtcccctatcccaggcccgcctggaggcaacctcctct  
ccctgcaggtggggggcgcggtgctgcgagatctccggcttgcaccactatcggcagctgctgagcgtggagcccggc  
gccccaggcctcgggaactgctccggcaaggcgcggctccaccacagctcgtcggctcccaggctcgtggtcac  
cgacggcgtggttaactctcctggcggactgacaaggtgctgcgaggtcggttcgacccccgcctcagccgctgg  
ctcatctgggtgagtggtcacCCCCTCCGGTTCGACCTGGCAGGAGCCCCACGGGGAGCTGGCGCACGGTCACGCGCCT  
C  
TCCTCCTAGGCTGCACCCGCGCCAGCCGCCAGCGGAACCCAGAACAGTTCTGCAGTGATTTACCAAGACCT  
GCACCT  
GGGCGAGAGACAGCTCCCACCTCTCCAGCCCCGCATACTCTTTTTTTTTTTTTTATAAA

>NM\_017637-Human-336DBTSS:NM\_017637chr9-1642627916426979hchr9\_00595  
attcagaattctgccccagtcagtgatctaacaaaactgaacccccaaaagctcattccggattcatcggatgagaag  
gatggggtcagcctctagaaaggaagagtgttctgtaatgatgtgggaagacattctatgacaaaggtactctcaaaa  
ttcattacaatgctgttcaactgaagatcaaacatcgatgcaccattgaaggttcaaacatggtctttagctccctcca  
agtctgaatcgccacagtgcaaaccccaatcctgccttcacatgcctatgctaaggaataaccgagataaagatthaat  
tcgggccacctcaggagctgccaccctgtcatagcaagtaaaaaatcaaatctggcactcacaagccctggccgacccc  
caatgggttttaccactccccctctagaccctgtcttcaaaaatcctctccctagccagctagtattttctgggctaaag  
actgtacaaccagttcctccATTTTATAGAAGTTACTACTCCAGGGGAAATGGTGAGTCCTCAAACCTCCCTCCCAA  
C  
CAGTCCCATCATTCCAACAGTGGTACCATAGAGCAGCACCCCCGCCACCCTCTGAGCCAGTAGTGCCAGCAG  
TGATGA  
TGGCCACCCATGAGCCCAGTGCTGACCTGGCACCCAAGAAAAAGCCCAGGAAGTCAAGCA

>NM\_017637-Human-337hchr9\_P026723chr9-1671779416718494hchr9\_00595  
tcagatattatgtgtatatacagaagcattgttgagaaaaattcccggggaaggccctagctccccttgccctgtgc  
accgtgattgtgtgctgctggagtgatgataagtgatctatctgtatctgagaggggtagtcaggggtgc  
atgttgctcctgacagtggaacagtgagtgactctgactctgctatccaatgacatgcagtggtgagagttgaaag  
ctgatggtgggtctccagtgccgctgcacacctgacagcgagctgttaaactgagcaaggcaagcttggggagtcac  
aatctatgataaatgataggatctgtgcagaaggtgcgaaagaagctctgacccccctcccccaaatctcccc  
cttccccaatgaaatgcagttcagccagcttctaactacactacactcctgctactggctgccaagaggtcaaaaa  
atccacctcacttttcagtCAGAAGAGGCAGAAGTGGATGTGAGAGAAAGAGAGACACAGAGAGACAGAGAGCCAAA  
GA  
GGGCAAGAGACTTGACTTTAAGAGACTCCTGTACTGACAACTCCATGCAGTTCCGAACCAGAACGACTACGGC  
TGAACCA  
GGGTTTCATGGGGACATGGCAAAACGCTGATACTAACCTCTTATTCAGAATGTCCCAACAG

>NM\_030945-Human-338DBTSS:NM\_030945chr5-3407887534079575hchr5\_00343  
cttctgccactggtatccggaaggggaaatgagttaccttaagtgggccaagtggggaaataactaacgtacagctaga  
aaccaagagctgctgtaaagccctgaatgggtcccactgctatttcagacaaaactgatgcagttaaagcctgaatttc  
ctggcaagcacaagggtagattttccaaaaggcttttagactgcaatacacagcctttcatgtctaatacaaaaag  
caactgctggacacatgctctgttccagctgggtgtgatgtttcttcacactcaacagaaacgtgccaaggtg  
tgacattatgaatttcgcaactgggaactgtgcacacaaatcgttctgtgtgggtgggaaatgatgaatgggg  
gctgttctgctggggaggggctgctgtcactctggcatgctacagccttattattacacacaaagtataaaacc  
actccgctgctcagctctcAGCTCCAGTCTGGCATCTGCCGAGGAGACCACGCTCCTGGAGCTCTGCTGTCTTCTC  
A

GGGAGACTCTGAGGCTCTGTTGAGAATCATGCTTTGGAGGCAGCTCATCTATTGGCAACTGCTGGCTTTGTTT  
TTCCTCC  
CTTTTTGCCTGTGTCAAGATGAATACATGGAGGTGAGCGGAAGAATAATAAAGTGGTGG

>NM\_001797-Human-339hchr16\_P020268chr16-6371331063714010hchr16\_00153  
gaaggtggggtggaggagagaaagaatagaacgcgctcccgaattccaattgcttccctcacttgacgatacctt  
cccccaaccatcccggcccaggcgagagcccagcctggccagctggagcggatttgggggaaggagaaaatggg  
ggctccaacccctctcagcttccctccgcccctccctgattggctgtcgtccctggagcccaactcagtcgctc  
cagactccatctgagccctgaggagctggagcgcgcccagcggggcgggaggggggccacgaatccagggttagca  
tctctgggcccctgggggaggggaggggaggggaggggagggggggccacgaatccagggttagca  
gcctcggcttctcagccccgccttcttccctcacagcggcagcctcctcctccgccccccgcccgcacc  
cgctgcccggccacctCCCCCGGTTTCTCATTCTGCCACTAGCGCGCTCGGCGGCTCATTCCGCGGCCGCCGCC  
AGCTGAGGGGAGCGTTCGCGGGCCGAGGAGCAGATGCCGCGGGGGCCGCTCGCAGCCCGCGCTGACTTGTGAAT  
GGACCG  
GGACTGGGGCCGGGACTGACACCGCAGCGCTTGCCCTGCGCCAGGGACTGGCGGCTCGGA

>NM\_000079-Human-340DBTSS:NM\_000079chr2-175454507175455207hchr2\_01025  
cttcccagcagcagactcaaccagctacacttttctgaaatccaggcagtcagaaaagccccggcacccctcagccta  
aactgaagcagaggaaatgaaactgaagcattgttgagaatgtggattttgtggttaggacaaacagctgactat  
ctactcagacaaatgacctaatcaagcaaccacagagatgaggttctggtttacaaaagagaggcagtttctc  
accatttaaaataattccttctctatacatttttttcttaagatctgactactggtgcatttaaaataatgc  
agttcactcagcttctcaaggtaagcaattgtgtaagttaggcatactgtaatggtgtacagtcaccagtaactcc  
ctggctccagggtgagggcagcccagctgtcgtcccaaacaggtggtgtaaaacaatagctctagttagccgact  
cgtttcaaaccctccagcAGACAAGCACCCAGCCAGAGTGCCAGTGAGAAGCACAGGCCACCACTCTGCCCTGGTCC  
A  
CACAAGCTCCGGTAGCCCATGGAGCCCTGGCCTCTCCTCCTGCTCTTTAGCCTTTGCTCAGGTAAGTGCTGGGG  
TCAGGG  
GTGGGGAGAGGGCTCTCCTTTGAGGCTAAAGTGCTGGAGGCCCCCAAATCAAAGTCTTGC

>NM\_000079-Human-341AY557345\_1chr2-175454487175455187hchr2\_01025  
caccagctacacttttctgaaatccaggcagtcagaaaagccccggcacccctcagcctaactgaagcagaggaaat  
aaactgaagcattgttgagaatgtggattttgtggttaggacaaacagctgactatctactcagacaaatgacc  
taataagcaaccacagagatgaggttctggtttacaaaagagaggcagtttctcaccatttaaaataattcct  
cctcctatacatttttttcttaagatctgactactggtgcatttaaaataatgcagttcactcagcttctca  
agggtgaagcaattgtgtaagttaggcatactgtaatggtgtacagtcaccagtaactccctgggctccagggtgaggg  
cagcccagctgtcgtcccaaacaggtggtgtaaaacaatagctctagttagccgactcgcttcaaaccctccagc  
agacaagcaccagccagagTGCCAGTGAGAAGCACAGGCCACCACTCTGCCCTGGTCCACACAAGCTCCGGTAGCCC  
AT  
GGAGCCCTGGCCTCTCCTCCTGCTCTTTAGCCTTTGCTCAGGTAAGTGCTGGGGTCAGGGGTGGGGAGAGGGC  
TCTCCTT  
TGAGGCTAAAGTGCTGGAGGCCCCCAAATCAAAGTCTTGTCTTTGATGAGACCACAGA

>NM\_000079-Human-342HSZ82984\_1chr2-175454426175455126hchr2\_01025  
cactgaagcagaggaaatgaaactgaagcattgttgagaatgtggattttgtggttaggacaaacagctgactatc  
tactcagacaaatgacctaatcaagcaaccacagagatgaggttctggtttacaaaagagaggcagtttctc  
ccatttaaaataattccttctctatacatttttttcttaagatctgactactggtgcatttaaaataatgca  
ggtcactcagcttctcaaggtaagcaattgtgtaagttaggcatactgtaatggtgtacagtcaccagtaactccc  
tgggctccagggtgagggcagcccagctgtcgtcccaaacaggtggtgtaaaacaatagctctagttagccgact  
gcttcaaaccctccagcagacaagcaccagcagagtgccagtgagaagcagccaccactctgccctggtccac  
acaagctccgtagccatgGAGCCCTGGCCTCTCCTCCTGCTCTTTAGCCTTTGCTCAGGTAAGTGCTGGGGTCAGGG  
G

TGGGGAGAGGGCTCTCTTTGAGGCTAAAGTGCTGGAGGCCCCAAATCAAAGTCTTGCTTCTTTGATGAGAC  
CACAGAA  
TGGCAGAGCCTCCCCAACAGGGGCTGCTCTGTCAGTTTCTTCTGATGTTAGCTTGATT

>NM\_013246-Human-343hchr11\_P023372chr11-6689954766900247hchr11\_01064  
tttcccagctttggggctactacattaagattcaagacaaactggggactgggggctgtgtgtaaagccaattgtcc  
ctgtaccacactggcctgggtccctgtttcagagctgcagccctcagttcctgcaaaccagtgctttctggctgccccag  
gtggatgtgtgctgggatggcgtgtccactcccacttctgttctcagtgcttctctctccccgcacccgctgcttccc  
ccttctctccagctccctctcccccttttctactcccaccatttgcctctttgtctctcttctctcccagt  
cttggccttctctggtctcacccctctctctcgccccgccctttctcagcgccccctccctccgctcccccgac  
actgggctgctttctccctgactcagcaaggtgcttataaggtgctgaggggctcagccaaatccaaaccattgtg  
cagctccacaaggagcggcTTCGAGGCGGAGGGAGAGGCTGAAGCGGCTCCCTTCTCCCTCTCCCTCCTTCTTG  
CC  
CCCTCCCTCTGAAAGGGTAGCAGCTAGGGGGACCTCCTGGCTGGCCTCCGTGCCATGCACCCATGGGCATCTGC  
CTTCTT  
GACCTTGGCATGGGCATCAAGAAATCACTGGGTTCCATCCATCAGGAATGTCACTGAAACT

>NM\_013246-Human-344hchr11\_P023379chr11-6689758166898281hchr11\_01064  
gacaataggcagggggcggtcagcccagacaaagggcagcaggaaaaacaccatcactgctcccagggcagctcgct  
ggcatttgggagaatgtgtcattgcattactcaagggggaggaggaggaaggttagagatgaggaggcagaggtaggg  
tgggagcagggacctgcacaggcagaggttaggttgatcagggaccccgatcggcaggggacagggggcagggggcgg  
tgtcccagggcaacgctggggagaagcccacccgaagcggcgctgtccccggctcctgggagctcctcagacggactg  
atggcctccccccccctcccaggaggcccagggtggtaccgccacagcctgcctcacctcacccccctcggtgct  
gtgggaggagaggagcccagaagccctccctctccccctctacccccacccggggaggccgctacaa  
ttgtggttacagctttacaCGTCAGAAAAAAAAAAAAAAAAAGTTTGCAGAATGTCCCACACCGAAAAAAAAAAAAAAT  
CC  
GAAACCGAGCGAAAAAAAAACCTGCGAGTGGGCTGGCGGATGGGATTATTAAGCTTCGCCGGAGCCGCGGCTC  
GCCCTCC  
CACTCCGCCAGCCTCCGGGAGAGGAGCCGCACCCGGCCGCCCCGCCCCAGCCCCATGGA

>NM\_013246-Human-345hchr11\_P023392chr11-6689032866891028hchr11\_01064  
gggggaaggggactgtaggaaccaggcagtagtgccagggggttaggggtggtgaggtatgctgtaagattt  
gggggtggtccagaggtgttcagagagcccaggagagaaggaagggggttgaggagccgaggaccatggggaaccggc  
cccctctcccgtgttctcttccacatcccagaccctactctggagccagggaagaaaagggaggagggtggcggggg  
agctggtccagcccaggataaccaggaaattagttgtctctgtgctgtcagcgtgtgaacctccccctgggccc  
ttgctatcccagcctctccccttcttctccttcttcccagttatacatctccctcatcccttcccctgggcccc  
ggcgtccccgagggttgaaaggctctgcctcttccctataccatgctgtcttccatagccttctctgtctctac  
tcatgagactgctccatttCTTCTTCTGCAACCCTGCTCCTATCAGCTGAACCCTTCTTTCGGAGTGTAGTGAGTAC  
CCGTCTCTCCCCAGCCCCCTCAGCTGGTGGCCTGGGTGTGTCAGCGCAAATGGGGCTCTGGTTCCAATGGGCC  
ACTCTC  
ATCTCTCTTGTTCCTTGTGCAGAAAACCTTTGCTTCACTCCACTGCCCTCTCTAGTTC

>NM\_005251-Human-346hchr16\_P013544chr16+8515483285155532hchr16\_00613  
tgggaaaaccagcaagtttccctagagaaaatttctgctccccgagcagtttcaaagacattttgtttccaaca  
gatcatgttcttgacagcttgcaagttacgggaaatgttttaacgacgcgatgagttatctcttctctgctt  
ttacagatttctgaaggtcattccagcgtgcaatgccaggagatccacaaggtgtcagcacctcatgataagca  
gggcgggccggcggtcttttcttcttctctctctgtagtctcctggtggcctcaagatgacgccaacaccac  
ggagtcgcccagcgtccaggtgcagcggccacgggcccggaggagcgcagcgggtggggcggaaggcgaattaa  
taccttaggctttatcgcgcttatttccaggaacacgcgaggccctctgggaccgattccgcttccgctcactg  
acttacaaggtcaagaaggGAAAATCAGCCAGAAAGTAGCAGCCCCCATCCGAAATACCCTGGCAGGTTAAAGA  
AAA



GCTGGGAAATACGGTTTTTGC AAAGTCCAGGTGTATGGAAGCGTTGTTTTAATAACCTGAACAAACATCTTT  
CCCGGAG  
TCCCCTGAGCAAACAAGAAACCTAATTCAGGGGTAAAGGGAAGTGTCTCTCTCACCTT

>NM\_005251-Human-347hchr16\_P013549chr16+8515768685158386hchr16\_00613  
atgtgggccattcaccaaatgtgatcataaaataaatTTtaataagataaactTTtaaaaagTTTcaagtgaga  
cggagtcgccgaggagccggggcggggcttagagccgacgattcctgcgctcctcgccccgattggcgccgact  
cctctcagctgccgggtgattggctcaaagtccgggagggggcgtggcccaggaaagtaaaaactcgcttccagcaag  
aagactTTTgaaactTTTccaatccctaaaaggactggcctTTTTctgggctcagcggggcagccgctcggacc  
cggcgctgaccctcggggctgccgattcgtgggggcttgagagcctcctgcgccctcctcgcgggccgagggt  
ccactgggtccccaggccggcgctcctcgtgggtccggccgcccgcctgcccgctgccgcccgggtcctgg  
agcagcgaggagcggggccGGCGCTGCGCTTGCCCGGGGCGCGCCCTCCAGGATGCCGATCCGCCCGGTCCGCTGAA  
AG  
CGCGGCCCTGCTCGGCCGAGCGCCGCCGCCCGCGCACCTCGCCCCGAGGCTGCCAGGAGCCCGGGGCCG  
CCCTC  
CCGCTCCCCTCCTCTCCCCCTCTGGCTCTCTCGCGCTCTCTCGCTCTCAGGGCCCCCCTC

>NM\_005335-Human-348DBTSS:NM\_005335chr3-122862256122862956hchr3\_00061  
gagttattcttctggcattcaattggcgcagcttattgaacatctatatgaaaactccactTTtaagtgtgtggg  
taatataggggtgagtttctTTtaagtcttatgctcaaaacccacataaatcactTTTccataaagcTTtcttg  
atgaatacaccataaccaaatgctctgaattccttactgtctcaaatgtaactgccaccatTTtaggacacaatgct  
gttctacagcattcttaagtgttttctgggtgaatgtttgttctcactggattacaaactcagagtcaaagcagc  
atTTtctatgactgctctatgacccccattgtcaaaacctgcaaaagaccaggcacagaaaactTTaatcTTtaaa  
TTtaagtgtctaaagcagaaggaactgactcaaatTTcaggaagtagctgtgaggatggggtggcaggaaatgacgaaa  
cctgaatacggaaactgaagcAGCAGCTCAGTTTCTCACTCCGAAGTGGCAGCAGCCAGAGAGGGAGTCGGTGTGGACG  
CG  
AGGAGCCGGGCGCTTAGAACAGAGGCTTGCACAGGTGGAGGTGGGTACTCTGAGCCATGGGACAGTTGGGAAA  
CACAGAG  
TAAGAGTTGAGGAGAACCTACCTGGCTCTTAGTCCTTGGTGATGGGCAAGGTCACCACT

>NM\_005335-Human-349hchr3\_P019740chr3-122838693122839393hchr3\_00061  
tcaagtactctctgtctcagcctccccagtagctggggctacagcgcacatccatgctggataatTTTgtatt  
TTTTtagagacagggTTTccccattTTggccaggctggctcaaatcctgacctcaggtgatccactgctcggcc  
cctgaagtgtgggattacagcagtagcaccgtgctggcctgagctcactTTtaaaacacaattgttatgtttat  
ctgacattctatgtcttatatgggagtaggggaaaggcatacattctatgtatctgctTTTTTTTctgcaatctc  
tactctctactTTTccccttctgaagaagaaggagaaaatgggaatgttctctcatcttggcatggaaatgagag  
aagagagggaaaaagtaagcaatattcaatTTaaagactacttaagacatggcttctTTaatcccctgtattcaagc  
cctgctTTTTccaggcccCTAACACTCTGTACCCATTCCTGCTGACCTCTCTTCTCCAGCGCTTCCCTGTGTGCTGGA  
GCCTAAGGGTGGGCTCTCATGACTGCTCCTTCGACCACAGATTACTCTCGTGGCTTTGGTGGCCGGTACGGGG  
TGGAGAA  
GGATAAATGGGACAAAGCAGCTCTGGGATATGACTACAAGGGAGAGACGGAGAAACACGA

>NM\_005335-Human-350hchr3\_P019742chr3-122835697122836397hchr3\_00061  
caggagtcaagatgaggctgggcaacacagcaagatccccctctcaaaaaatacaaaaattagctgggtgtgggtg  
gcacatctgtggccccactactccagaggctgaggtaggaggattgctgagcctgggaggtgaggctgcagtgccc  
atgactgcaccactgactctagcctgggctgagaccctgtctcaagaaaaaaaaaagacagcagcttaggtctatag  
cctggcttataaaaaatccaggctcagggtatgccatcctcctattatccctgttctctatcgatacctcttacc  
atcctgtcccacaaatcccctcccggatatttaactgattccccttctcctcaagtccatgccctcccactct  
ccaatccaagacaacctaatTTTTctgctgtctgcagcttctagtggtaccgtgggctgaaggcgaatttgag  
tccatggctgaggagaagagGAAGCGAGAGGAAGAGGAGAAGGCACAGCAGGTGGCCAGGAGGCAACAGGAGCGAAA  
GGC

TGTGACAAAGAGGAGCCCTGAGGCTCCACAGCCAGTGATAGCTATGGAAGAGCCAGCAGTACCGGCCCACTG  
CCCAAGA  
AAATCTCCTCAGAGGTGAGCGCCTGGCCCTCTGGGATCCACATCCAGGATCTCTTGCCCA

>NM\_005335-Human-351hchr3\_P019743chr3-122833899122834599hchr3\_00061  
gcaaaccacaaagattctctgccccaccatcttctcagctcttagaatgtgggctgtgcagggtggccaaccatc  
ctggttgccttgcaactgttctggttagcactgaagaccttgccttctgggaaactcctctgtcctgggcaactagt  
atagatgattatcctagctgtgtagctcaacaatgtgctcttgcctcaatgtttcttggctcccaaagaatctgact  
tgtttctactccctcccctcacacctttacattctctcccattgtctctggatgtgtttgggtgggtgggtgtg  
ggaggagattgaagaatgaagatggatgaaaggctgttccccaggagaggctgttagatggaggcaagggtagagggg  
agaagaggcagggtggtgaaggcggggatcttatcagctcctcattgattcctcctggaaagtgaagtcacagtgct  
ccacactgtcttctcaggACAATGAGGAGCCCCAGCTCTGCCCCCTAGGACTCTGGAAGGCCTCCAGGTGGAGGAA  
G  
AGCCAGTGTACGAAGCAGAGCCTGAGCCTGAGCCCGAGCCTGAGCCCGAGCCTGAGAATGACTATGAGGACGT  
TGAGGAG  
ATGGACAGGCATGAGCAGGAGGATGAACCAGAGGGGGACTATGAGGAGGTGCTCGAGCCT

>NM\_004967-Human-352AF499458S3\_1chr4+8907738289078082hchr4\_00902  
atatcaacttaattatgagcaatgaagatatttcaggaggaacatcaaatgatataaaatattgatggttcac  
tgctcctttcccttattatttagttttcttcttttttagctaaactaatgtaaattataatctaatgacagcaagct  
ttccttcttgcacatagtgaaaactgtataattatgaaatttttaaagggttaaagcctttgttatttttaatt  
caaatccagtataattatacatattcggagcccaactattcatcttcaataacctcaattaaattcccaatgc  
aaacctctggctctagaatcacgtttctgtttatcaactgagcctgtgtctgaaaaagtgtgaagttgggggt  
ttctggtgagaatccacgttctgacatcaccttggctgtgacagtgattggctgttgaaggcaagaagagttatagc  
cagcaagagcaagtgaatgaGTGAGTGAGAGGGCAGAGGAAATACTCAATCTGTGCCACTCACTGCCTTGAGCCTGC  
TTC  
CTCACTCCAGGACTGCCAGAGGGTAAGATTTAATAGAACAACCTCATTATCATAAAAATTAGACACTCCATAGT  
TTACATC  
TCTGAACCTTGGCTTTGAATTTTTCATTTAAATGATGTTATTGCATTGTACATGGTTTAAAT

>NM\_004967-Human-353HUMSIALP01\_1chr4+8907738089078080hchr4\_00902  
tcatatcaacttaattatgagcaatgaagatatttcaggaggaacatcaaatgatataaaatattgatggttca  
tctgctcctttcccttattatttagttttcttcttttttagctaaactaatgtaaattataatctaatgacagcaag  
ctttccttcttgcacatagtgaaaactgtataattatgaaatttttaaagggttaaagcctttgttatttttaa  
ttcaaatccagtataattatacatattcggagcccaactattcatcttcaataacctcaattaaattcccaat  
gcaaacctctggctctagaatcacgtttctgtttatcaactgagcctgtgtctgaaaaagtgtgaagttggggg  
tttctggtgagaatccacgttctgacatcaccttggctgtgacagtgattggctgttgaaggcaagaagagttata  
gccagcaagagcaagtgaatGAGTGAGTGAGAGGGCAGAGGAAATACTCAATCTGTGCCACTCACTGCCTTGAGCCT  
GCT  
TCCTCACTCCAGGACTGCCAGAGGGTAAGATTTAATAGAACAACCTCATTATCATAAAAATTAGACACTCCATA  
GTTTACA  
TCTCTGAACCTTGGCTTTGAATTTTTCATTTAAATGATGTTATTGCATTGTACATGGTTTAAAT

>NM\_002243-Human-354AP001731\_1chr21+3859021738590917hchr21\_00166  
ctagcttccaaagacttggacctgttcttctgcccaggaccagctgtgcaagtgggatggttctgacaatctttc  
cactctaattgctctgactcaacagtagcaatgcattccacaggcgtaaaaatattctagactcttccctccagcg  
ctcactgttactcctctgacttcccctcctgctccccgtgtgcccgtcagttcatagcggcctcaatgagggtg  
ggtaaacctctcttccagggtgtttgtctacggagctcccctccagggtgggaactgtgtggtgagggtgtggtg  
gggtcagcttcttctaaatcgtccttgaacctttaccctattctgtgactgtgccgattccagggttgaag  
taaattgccactgcgtaactctagaaaatcatcgggggtcagtttactgggggtgacttgtaacctatgatca  
tgtgtccctcttctcagGCAGTAGCAGAATCCCATGGTAGCCAGGTGGGTGAAGGGGAGCGAGGACGTTCTACCTG  
C

CTTGAAGAAGACACCTGACCTGCGGAGTGAGTGACCAGGTAGTAGACGGTTCTGAGGGCATCACACACTTGAG  
GGAGGGA  
GGAGGACAGAGAGGGCCATGGCACCCCTTTGACTGCTGAGTGCCAGCTGCTCTCTTTCCCA

>NM\_002243-Human-355hchr21\_P90020chr21+3855023938550939hchr21\_00166  
gagtttctctgtggcattttgcttaggtatgttgacataggtatagctgtatggattcattctgattccaccagga  
ggcaagagattttgtaataattcatttggggaggagagaggaaagagaaaaagaaaacatgggataaaggagagattgt  
agaaaaggaatctggttatttattatagtttacttagcceaaggacctaaaatgctttgataagaatggccaaagt  
ttctcaagattaactggcattcttaaaaaggcatcagtttctttgacaggtgtttggagagcccggactggatg  
cccactagaatcctgtgctggtttgtagattccttaagaccttaagacatgctgacatcatggtctcctttctcagatt  
cctctctcttttctctttccccactctctctctctctctctctctctctctctctctctctctctctctctctctct  
ccctctctccctatccctccCTCCTCTGCCAATGTCTCCCAATCTCTTTCCCTTTCTCTCTTTCAGTTCCCTCCAGGTAATT  
CTTACTCAAACCTGTACCAACTGTTTTTGACTGACAGTGAACAGTGAGAGAGTTTTCTTCATTTTGAGGAAC  
CCTAAAC  
ACCTATCTTTCCCAAGGCAACCTGTCTGGACTGAGCATTCTCTGACTTGACATAACTTC

>NM\_002243-Human-356hchr21\_P90022chr21+3856579838566498hchr21\_00166  
taagaattactaaagatgaggcttgaccagatcattttccaaggatccagagcccttagagagaattcaagaggag  
aatttctggtgacttaccacctctgaagaattaaaaacttactgtgctgctttccaggcctctgtggtagttatt  
ctgcttgagcttttgtgtcaaatagcttttaagaaatctggagctatctcagataaaataccttaatgatccaga  
ggactgtctttaccataaaaaactgaagccatgtccagaagccctctggctcaaggctctgtcctggacacggat  
gagggcagctggggctgggaccgaggctctgctgaatgctcagcttctcaagctggggaggagagtggttctgccc  
taccggctcagccagcagggacgtagcctgaggtgtgggtgtacacaggctccccctgctgagtcagttcccc  
agatctctcatcacttcccCAGATCTCTGGGATCTTCAGCTGAGATTGGGCCCCAGCACCTGGACTCAAGGTAAGGCC  
C  
CTTAGGATGCTTGTAGCTGATCAATCAGGGTAGTGCAAAGGAAGAGGGGAAAAAGCCACCCAGACCTTAAAG  
GAGATTTT  
TGGAAGATCCAATCAAAGTGATTACCTTAACCTCAGGCATGACTTTTCCCCATTATCTG

>NM\_130830-Human-357hchr3\_P014454chr3-195571568195572268hchr3\_00567  
tttaaagcaataaaaaagtttaaaataagaaagaaagaaagaaagagaagaatgaataagtttctagaaccaca  
gggagaagcacttgcaataacttctaggagcaaaagaaaccccctgaatcctgctccatccctttctcggggtccttgc  
tccttgccagggcagggcagcaggggtccacagtcacttagggaggggttaccgggtcgtgtaaactcccctctca  
cggtggccaatgtaggaagaaatcaaaaagatacactgggggaaagaaagaaagaaagaaatgtgtcctgagttttaa  
atacgggtgaagcaaaccttacatttagggatgcccagctatgtgtaacctgtagtgtcagcccgggacatgcaggcac  
tgcactgtggcccacagtccccctcccaggccaactgccctctgagtgactcagcccgggatagtttaataacc  
gggacagcttaggcgagccaCACTCATGCTGCAGCCTTGAGCCGTCCCTCGTCTCCTCTCAGGCTCCCTCTGTCCAC  
G  
GCGGGCGGGCGCCGAGCTGCTGGTAAGTAGGCAAGCCACCCCATCCCTCCTCTCTGCTTAGAGGGCCCCGCCA  
GCCCCCT  
TCCCATTTCTGCTGGACCTGCTCCCCTCGGAGACCCAGAGGGGCAGAGCTGACATGTG

>NM\_002427-Human-358DBTSS:NM\_002427chr11-102331473102332173hchr11\_00021  
tttggtcaaatatcgtgaactcagtagacacaagacatctctgttagttattctagagaaatgcagttataatt  
accaggcagtagtaaacattctagaatcagtaacttctctttatggaagtaaacatgccatcttgatacacttatt  
attcgaagaagcaaaagtagatacgttcttacagaaggcaaaaaaaaaaatttgtaagtgaagtaaaaaatgtact  
actctgctctctcccacagatccataaatgctgagggcgtttatttggcagatgggtttgagaccctgctgaa  
acaagagatgctctcattatatttccctcaaatctaccacaaccacactcgggagggaaaagaaaagtcgccactg  
aagcatgttacctcaagtgactgggaagtggaaacctatccataagtgatgactcaccattgcaggcctataaaagta  
aagtaaatctctgcggaagACAACAGTCCCCAGGCATCACCATCAAGATGCATCCAGGGGTCTGGCTGCCTTCCTC  
T

TCTTGAGCTGGACTCATTGTCGGGCCCTGCCCTTCCCAGTGGTGGTGATGAAGATGATTTGTCTGAGGAAGA  
CCTCCAG  
TTTGCAGAGGTAGAGTATCTTGCCAATCCTGATGATGCGGTTGGTACATCTCAGAAATGT

>NM\_002427-Human-359HSCGN3PRO\_1chr11-102331565102332265hchr11\_00021  
ttgtcagaggtcatgccagtgttttaattccaacatggggctcaatcctgcggttgccgtagcacctccaagtc  
atcaagcttggttttggtccaatatcgtgaacttcaggtagacacaagacatctctctgtagtattctagagaaaatgc  
agtttataattaccaggcagtagtaaacattctagaatcagtaactaagtttctttatggaagtaaacatgccatctt  
gatacacttattatcgaagaagcaaaagtagatacgttcttacagaaggcaaaaaaaaaaatttgctaagtgaagt  
aaaaatgtactactctctgcttctccacagtatccataaatatgctgaggcgtttatgtccagatgggtttga  
gacctgctgaaacaagagatgctctcatttatattccctcaaattctaccacaaccaactcgggagggaaaagaaa  
aagtcgccacgtaagcatgtTACCTTCAAGTGAAGTGGAAACCTATCCATAAAGTGAAGTACTCACCATTGCA  
GG  
CCTATAAAAGTAAAGGTAATCTCTGCGGAAAGACAACAGTCCCCAGGCATCACCATTCAAGATGCATCCAGGG  
GTCCTGG  
CTGCCCTTCTCTTCTTGAGCTGGACTCATTGTCGGGCCCTGCCCTTCCCAGTGGTGGTG

>NM\_002427-Human-360HSCGN3PRO\_2chr11-102331515102332215hchr11\_00021  
cctgcggttgccgtagcacctccaagtcacagcttggttttggtccaatatcgtgaacttcaggtagacacaagac  
atctctctgtagtattctagagaaaatgcagtttataattaccaggcagtagtaaacattctagaatcagtaactaagt  
ttctctttatggaagtaaacatgccatcttgatacacttattatcgaagaagcaaaagtagatacgttcttacagaagg  
caaaaaaaaaaatttgctaagtgaagtaaaaaatgtactactctctgcttctccacagtatccataaatatgctg  
aggcgtttatgtccagatgggtttgagaccctgctgaaacaagagatgctctcatttatattccctcaaattcta  
ccacaaccacactcgggagggaaaagaaaagtcgccacgtaagcatgtttaccttcaagtgactgggaagtggaaacc  
tatccataagtgatgactcaCCATTGCAGGCCTATAAAAGTAAAGGTAATCTCTGCGGAAAGACAACAGTCCCCAGGC  
AT  
CACCATTCAAGATGCATCCAGGGTCTGGCTGCCTTCTCTTCTTGAGCTGGACTCATTGTGGGCCCTGCC  
CTTCCC  
AGTGGTGGTGAAGATGATTTGTCTGAGGAAGACCTCCAGTTTGCAGAGGTAGAGTAT

>NM\_002427-Human-361HSCGN3PRO\_3chr11-102331448102332148hchr11\_00021  
gtagacacaagacatctctctgtagtattctagagaaaatgcagtttataattaccaggcagtagtaaacattctaga  
atcagtaactaagtttctttatggaagtaaacatgccatcttgatacacttattatcgaagaagcaaaagtagatac  
ttcttacagaaggcaaaaaaaaaaatttgctaagtgaagtaaaaaatgtactactctctgcttctccacagtatc  
cataaatatgctgaggcgtttatgtccagatgggtttgagaccctgctgaaacaagagatgctctcatttatatt  
ccctcaaattctaccacaaccacactcgggagggaaaagaaaagtcgccacgtaagcatgtttaccttcaagtgactg  
ggaagtggaaacctatccataagtgatgactcaccattgcaggcctataaaagtaaggaatctctcgggaaagacaac  
agtccccaggcatcaccattCAAGATGCATCCAGGGTCTGGCTGCCTTCTCTTCTTGAGCTGGACTCATTGTGGG  
C  
CCTGCCCTTCCCAGTGGTGGTGAAGATGATTTGTCTGAGGAAGACCTCCAGTTTGCAGAGGTAGAGTAT  
CTTGCCA  
ATCCTGATGATGCGGTTGGTACATCTCAGAAATGTCCTTCTCTTTTAAACGCAGTTCATT

>NM\_002427-Human-362HSU52692\_1chr11-102331441102332141hchr11\_00021  
caagacatctctctgtagtattctagagaaaatgcagtttataattaccaggcagtagtaaacattctagaatcagta  
ctaagtttctttatggaagtaaacatgccatcttgatacacttattatcgaagaagcaaaagtagatacgttcttac  
agaaggcaaaaaaaaaaatttgctaagtgaagtaaaaaatgtactactctctgcttctccacagtatccataaat  
atgctgaggcgtttatgtccagatgggtttgagaccctgctgaaacaagagatgctctcatttatattccctcaa  
attctaccacaaccacactcgggagggaaaagaaaagtcgccacgtaagcatgtttaccttcaagtgactgggaagt  
gaaacctatccataagtgatgactcaccattgcaggcctataaaagtaaggaatctctcgggaaagacaacagtc  
aggcatcaccattcaagatgCATCCAGGGTCTGGCTGCCTTCTCTTCTTGAGCTGGACTCATTGTGGGCCCTGCC  
C

CTTCCCAGTGGTGGTGAAGATGATTTGTCTGAGGAAGACCTCCAGTTTGCAGAGGTAGAGTATCTTGCCA  
ATCCTGA  
TGATGCGGTTGGTACATCTCAGAAATGTCCTTCTCTTTTAAACGCAGTTCATTTTGGTGT

>NM\_015529-Human-363hchr6\_P016432chr6-132764207132764907hchr6\_00023  
gtcactgggaacaaaggctctgaaagtcgacagcaacggatacggagacgtgaaggttaccctggacgggcctttctgt  
gcatcgaccccagactacccccttctcactcaatcctcctcctccaggctaaactgctctctgctcaatgtcca  
ttctttccctggaacctctcgccacgtcccgcagaccacgtctctcccgtctaggattctcttgccctcctcctt  
ttcctctgctctggcctcttttctcctctctcggcgtctgcctcctcctcctcctccttcttccgggaag  
cccctcgcttcttcccaccgagccccacctcggggaccaagtcaggggtcgggggtgcaagtggatccgctggaag  
ggccgggacgggtgagagttggcggggctgggaccgacgggacgggacgggacgggacgggacgggacgggacggg  
tgcaggcggccggggcgggGAGAGCGGTCCTGCCCTCCCGGGCGGGCGCGCCGCCCCGAGGGGCGGTCCCTG  
GG  
CTCCCCTCGCCCGCTGCCGCTCCTCGTTCTGCTCCTCACTCCCAGCGGCTGGAGGCCGTACCGGCGGGCA  
GGAGG  
CGCCGAGGATGTGCTGCTGGCCGCTGCTCCTGCTGTGGGGGCTGCTCCCCGGGACGGCG

>NM\_021127-Human-364EP74612chr18+5571770855718408hchr18\_00001  
tactgccatactctcaagttcgaaaagtttctttccaatctcttttctgggctgtttaccaagtcttaattgc  
caaggcctctggtctctccccaccacaacgttctcctggttaaacccttcccctcccactcccagctcccggccac  
tcccagctcccggcaccactccgctgacgacgtccagcgttgcagatggtcaaagccgacccccttctcctcccact  
cgttttgtaaggaagtaatttcggggccgagcgtctgcgccccccgcggggtcggcgccgcccgggtcgggagcgt  
gtccgggacggtcgcctcagcggggtacttccccgcccgtcccgcgtccgctccataacccgctcgcggggcggg  
gacaggggcccgggacaggggcccgggctctagttccctacgtcaccaggggaagttctcactggacaaaagcgtgg  
tctctggcggggatctcaGAGTTTCCCGGGCACTCACCGTGTGTAGTTGGCATCTCCGCGGTCCGGACACCCGATC  
C  
CAGCATCCCTGCCTGCAGGACTGTTCTGTTTTCAGCTCGCGTCTGCAGCTGTCCGAGGTGCTCCAGTTGGAGGC  
TGAGGT  
TCCCGGGCTCTGTAGCTGAGTGGGCGGCGGCACCGGCGGAGATGCCTGGGAAGAAGGCGC

>NM\_021127-Human-365DBTSS:NM\_021127chr18+5571770755718407hchr18\_00001  
ttactgccatactctcaagttcgaaaagtttctttccaatctcttttctgggctgtttaccaagtcttaattg  
ccaaggcctctggtctctccccaccacaacgttctcctggttaaacccttcccctcccactcccagctcccggcca  
ctcccagctcccggcaccactccgctgacgacgtccagcgttgcagatggtcaaagccgacccccttctcctcccacc  
tcgttttgtaaggaagtaatttcggggccgagcgtctgcgccccccgcggggtcggcgccgcccgggtcgggagcgt  
tgtccgggacggtcgcctcagcggggtacttccccgcccgtcccgcgtccgctccataacccgctcgcggggcgg  
ggacaggggcccgggacaggggcccgggctctagttccctacgtcaccaggggaagttctcactggacaaaagcgtg  
gtctctggcggggatctcAGAGTTTCCCGGGCACTCACCGTGTGTAGTTGGCATCTCCGCGGTCCGGACACCCGAT  
C  
CCAGCATCCCTGCCTGCAGGACTGTTCTGTTTTCAGCTCGCGTCTGCAGCTGTCCGAGGTGCTCCAGTTGGAGG  
CTGAGG  
TCCCGGGCTCTGTAGCTGAGTGGGCGGCGGCACCGGCGGAGATGCCTGGGAAGAAGGCGC

>NM\_178532-Human-366hchr5\_P003275chr5+6349695363497653hchr5\_00171  
gcacaagaagtaagcaacgaagatagatatacgaagggaaaactaaaccaggtagcgttgccagcttaaaagtctt  
aggcatggggatgggtggatgggacgcccgcctaagatttagcagggaaacagaccagtagttggcttgatctcttaa  
ctccagaaaaggccagtgaggacaagggagaccagggataatttctgtggctctgtaaggggatgacaagggagaa  
aaactttccacgggtccgtctggcccggcgcttctcctcctcgcgggggtcaaagcccggcgcccacgcgcggc  
tcgggtgggaacccgacagcgtggggcagcagggcctggctgtggcgggagcgcggggcgccacgtccgaggcc  
gccccgtcggggctgagggcacagctcagcgttcccggggtttggctcctgtcgttcccgtctcggcaaccggc  
atcgccggccggagccgcAGCGAGTCTCAGAGCCTGGCTGCTGGCGGCCGGGAGCGCCGGGACGGGGCGGAAGC  
CG

GAGGCTCCGGGACGTGGATACAGGTAAGGCCGGGGTCGGAGTCGGGCGGGGCGGGCGGGCGGCCTCTC  
GGAGGGA  
CCTGGCCTCGGCCGGGCCCTACCCAGCCGGGTGGCCGGGCCCCACGTTGGCCCAGGC

>NM\_178565-Human-367hchr8\_P016320chr8-109164851109165551hchr8\_00613  
aacaagtaataacagttctgaggatgaacaaaagctgttgggaataccatttactctcaaaagtgggggcgcgtt  
tatgaataattcagccggtaacataccttctgcaaaacacagacaagatgtaaataaaaagtgccagagttgtggc  
atattgcaaaagttaaaaggagtcacagtcctcagtcagatctccctgcagaaagttggcgtgaggttgaactg  
accctagagggctggagaggacccttgggggtgagcagccgggtctgggaccagcaaggtcagggggcgtctcccca  
gctacttttatctatccccgcactctggaagcccgaagaggattcgctccaagttaggcgcgctgttggctgtcaac  
gttctttaggacctcagggaaaccgggacgttctggctttaggaccaggaactccgaggcagcctagacttagatgcc  
ttgaccacagcaccacctaCTTATAGAAGCATCCCAAGCCTCAGCCGGTCTGCATCTCCATCGGAAAGTGCCTTGCC  
A  
CATCCCTTCGGATCACTTCGTCTCTCCCGAGAGCGTTCTGCCTTCTACAGCTCGGAAAGAAAGAAATCTTAGCTG  
TGAAGT  
GACCGTGGAGAAAGCGCAGGAAGCGACACAATTGGTTAGGGAGGCAGAGAGTGTGAGCGG

>NM\_004348-Human-368hchr6\_P006789chr6+4549526745495967hchr6\_00221  
agcaatggatgagctctctctctctttttgaggcgaagcctggcttccctcccggatcggccgctgtgggactc  
gagagacctgtgcacgcaggggacgcggcggtgcccggggttagagctctcccgtgaccgaaaagataataaaaaatc  
gcacgcgcaggagccagctcagctcctggctgcgctccagttggtccggctctggctaaatgggttctgcaccctggcg  
gcccgggctgggaggccagtaggcccggcgcaagagtaggttgggaccaggtgtcatagccggtggcgagaatcgc  
cttctcggagtaccgaggggtggcagtgccagggcgcggtgtggggcgggaggggcgcggttggggctagtgtctgtg  
gagggatttggggaagaggcaggaactgtggagagaacgtgggaaaggaaagaccgacgagggaggcgtggagcagtg  
atggggaagggcaggtaaaAATAAAGCCCCAATTAGGAAGGACAGAGTAGTATCCCCTGAACTCCATCCTTACCCC  
TCG  
AGAGCGCACACCTGGCTACCCCGCACCCCCACCTCTGCTCCCGGGTCTGGCAGACCCTCAGTCCCCCGCGCATC  
TCTTC  
AGCGGGGCGATCCCGAGTCACGCAACCACAGCCCCCAAGCTCATCTTGTACTCGAAAGG

>NM\_004348-Human-369hchr6\_P006793chr6+4549724445497944hchr6\_00221  
gcacagaggctcaagaattttcttctctctctgaagtacaacgaaaatagcgacagtcagatcagccggggct  
ctctggtgtctcggttcaatctcttctcaaaagagggggttcttctgctaggggtggggagagcaagaggacgcgac  
ctggcgagattgccctagctggtggcctctaggtctcgaaactgcacacggcgcgccccgggctcttctcgcg  
ccggctggcgggcgagcggctgcgattcgcaggctcagattcgttccccgagatccgctgccacgacttactctt  
ggcacctgaagcgcgagagacaggggagcttgcattgcaggagggagtgatgcaaagaggtggtgtgagagggc  
gagaagaaaagaagggaaaggagcctagccgggagccgggctggcagcccccgggaggaatctgagcgtgcag  
cccgcgccccgggagcggcgGCCGCGCGGAGCGCGCGGGAGGGCGGAGGCGCGGCCGCTGCAGCTGGGTA  
GCA  
GCGCGCGGCGCGGCGCGGGTGGCGGGCAGCGCGCGGCAATGCCGGCCCCGGGGTGGACTGCTGAACCCACA  
CCGCTT  
CACCACCGGACTCCAACCTGGGAGGGGGCGCCAGCGCACCCAGGACGCGGTGCCCAAGGG

>NM\_003701-Human-370AF544022\_1chr13+4204597442046674hchr13\_00206  
gtctgaggtgcaatccttctcttagcaaaaggtgtctctcgtctctttaaaccatctcttgacctccagaagac  
agctgaggtggcaaggggagctggaaccactggagtagccccagcctctcttggaggccccatgaaggaggcc  
cttcagtgacagagattgagagagagggggcgaaaggaaggaaggggagccagaggtgggagtggaagaggcagcctc  
gcctggggctgattgctcccaggccagggctctcaagcgggttataagagttggggctgccccggcgccctgccgct  
cgccccgcgccccaggaccaaagccgggctccaagtcggcgccccacgtcagggctccgcccagcctccggagttgg  
ccgacagacaagaaggggagggagcgggagagggagagctccgaagcagagggccgagcctatgcgccgcccagc  
agagactacaccaagtacctGCGTGGCTCGGAGGAGATGGGCGGGCGCCCCGAGCCCCGACGAGGGCCCCCTGCAC  
GC

CCCGCCGCCCTGCGCCGACACCAGCCCCCTGCCGCTCCCGCTCCATGTTGCTGGCCCTCTGGGGCTGGGGCTGGGCC  
GGGCC  
AGGTTGTCTGCAGCGTGCCTGTTCTTCTATTTTCAGAGCGCAGGTGAGTGGCCACCTTC

>NM\_003701-Human-371hchr13\_P002097chr13+4203172042032420hchr13\_00206  
gctgatactgagaggtgacagcatgctggcagccctcgcagccctcgtctcggggctcctcggccttgaccactc  
tggccgcttgaggagccctcagcctgctgactgtaggagctccttctgggctggccaaggccagagccagctc  
cctcagcttgcggggagggtggaggggagggccccgggcgggaaccagggctgcgctcgggtcctgaccgagccagcaag  
ttccgggtgggagtggtgcttggggccgcactcggagcgccggcgggccccgcagccccgggagtagcgggcttag  
cactgggccagcagctgctgtctcaattctcgccggccttagctgccttccctggggcagggctcgggacctgca  
gccccgatcctgagcctccccgacctcctggctcctgtgcagccggagcctccctgataagcgccccctgct  
cctatggcaccagtccttcGACCACCAAGGGCTGAGGAGTGCGGGCACACGGCTCAGGACTGGCAGGTGGGATCCA  
CT  
GGGTGAAGCCAGCTGGGCTCCTCAGCCTGGTGGGGACTTGGAGAACCTTTATGTCTAGCTAAGGGATTGTAAA  
TACACCA  
ATCGGCACCTCTGTATCTAGCTCAAGGTTTGTAAACACACCAATCAGCACACTGTGTCTAG

>NM\_003701-Human-372hchr13\_P90006chr13+4204329442043994hchr13\_00206  
aacagagggagccactgggtgaggagagctgagaaagacttctggagaggcgacattgagctgagaaaggaaagaca  
gtgggagagtccctcagggtgagaagttggagagatgagcgtccagtaggtagattgagctgtagaaaagga  
gtcttagccagcttgaaggactattggagagtttattttatttttatttttatttttagacagaatct  
tgcttctctcccaggctggagtgcagtgcatgatttagcttactgcagcttcgacctcctggctcaacaatccac  
ctatctcagccttctgagtaactgggaccagagatgtgcacaaaaatgcctggctaattgctcattttttgaaagata  
gggtcctctatgtccccaggctatttccatctcctgggctccagtgcacctcagcctcggccaccacaagtgctgg  
gattatagaagtgaaccactGCGCCTGGCCTATTGAAGGTTTTTAAATCTTCAGAGTTTCGACTTTATCAACAACACTT  
AG  
AAGCCACCAAAGAATTGCAGGTATGGAAATGCATATACTTTTGCTTTTAGAAGAAAATCCTGATCAGTGTGC  
ACAGAAT  
TCTTCAGGGGGCAAGTGTGATTCTTCTGATAAGATATAGCATGGCTTAGACTGGGAGAC

>NM\_001623-Human-373HSY14768\_1chr6+3169051131691211hchr6\_00134  
caggctgggagtgaggttctctcctttaaaccctgtgccatctgtcaccctctggagctgccagcagactca  
gattcttccgatctacagagcagaaaaattcagccagccttctgtcttctatccacagctgcctgccagactc  
atgaaacctgacaaaatgcaaggttctacattacctaacctggactgtcaaaaatactagtctgagaataa  
atccctgtgtcttctcctctgcacacctcagtggttataaaattttgttatgctcactgggctctc  
atgagaggaaatgggagaatgtatttttaattctgacttccaccaggtccccctcctggtgtgtagt  
tcagcagaacctgatggggaagtgaggtctgggagcagaggaggagaatgaggggaaaggggaagtggggaggag  
gctctgagaagactgtggGAGAGAAGGAGAGCCTGCAGACAGAGGCTCCAGCTTGGTCTGTCTCCCACCTCTACC  
A  
GCATCTGCTGAGCTATGAGCCAAACCAGGGATTTACAGGGTAGGGAGGGTGGGATAGGCAGCGGCATTAGATC  
GGAGGAA  
TGAGATGGACAGACCTGGGCTGTGGGCTAGGAGGGCAGTCAGCTGGCCTAGGGTAGCCCC

>NM\_001623-Human-374hchr6\_P003417chr6+3169126731691967hchr6\_00134  
accacacaggagaaagcttcggactgtgaaggccagcaggaagagaggctggatgagatcaacaaggtagaagga  
agaactaagggggcagagccagggggatggggcgtggatgggagggcctaccctggctcatttccctccatagca  
attcctagacgatcccaaatagcagtgatgaggatctgcctccaaactggaaggctcaaaagtgagggggaactg  
tagccggtggagacagggtggggtaggagggttaggattccacaagaacaaggcaggaacagcagagataaaaggt  
tactttgtgtagcaaaagggaacctgcttattgcctcctgcacactgcggtccttcccgggctgctcctc  
tcagcatcccctagctccttacacctagcggggccccctaacccccacccactcctcgtgctgccccctcctc  
tcttccaggtgtctctcCACCTAGCAGTTGGTTGGCAACCCCTTCTCAGTCCCCTGCTGAAAACCTCCAGTCAGC

GCTTATCCCTTCTGCTCTCTCCCCTCACCCAGAGAAATACATGGAGTTTGACCTTAATGGAAATGGCGATATT  
GGTGAGA  
AACGGGTGATTTGCGGGGGCAGGGTGGTGTGCAGGCCTAAGAAGACAGAGGTCTCTCCTA

>NM\_001211-Human-375DBTSS:NM\_001211chr15+3824003238240732hchr15\_00075  
tgaggaaaactgatggtcagaaagattatgtagcttgcaaggttgacatttggtatgattttacagaactagaatcc  
agcttttgaattcaagggtggggcaggaaacagctaggtcagtgcccaagaactccggacgggtgagatttggggcag  
acagcaggggtagtccacctacaagagtcacgccaagtgaagcactcagagacatctccaactcaaaacagcaaag  
aagtctggtgcttaagtgttctcgtcggctcagagactcggctcagccgactcaagacagcacctgggggta  
ttgtttgcttaagcctgctgacttccacggccattgaatcccaaaaactacaattccattatgcaccgcgagttcg  
cggactaaacaggcataaactacaagccccagaatgccttggggcagagcgcgagagcagggagcggaggggcgtggc  
cagctcgaccgcgaggaccGTTAAATTTGAAACTTGCCGGCTAGGGGTGTGGGCTTGAGGTGGCCGGTTTGTTAGG  
GAG  
TCGTGTACGTGCCTTGGTCGCTTCTGTAGCTCCGAGGGCAGGTTGCGGAAGAAAGCCCAGGCGGTCTGTGGCC  
CAGAGGA  
AAGGCCTGCAGCAGGACGAGGACCTGAGCCAGGAATGCAGGATGGCGGCGGTGAAGAAGG

>NM\_001211-Human-376AF441125\_1chr15+3824036338241063hchr15\_00075  
taagcctgctgacttccacggccattgaatcccaaaaactacaattccattatgcaccgcgagttcgggactaaaca  
ggcataaactacaagccccagaatgccttggggcagagcgcgagagcagggagggcggtggccacgtcgaccg  
cgccggaccgttaaattgaaacttggcggctaggggtgtgggcttgaggtggccggtttagggagtcgtgtacgtg  
ccttggtcgttctgtagctccagggcaggttgcggaaagaaagccaggcggctgtgcccagaggaaaggcctgcag  
caggacgaggacctgagccaggaatgcaggatggcggcggtaagaaggaaagggggtgctctgaggtaggtacgggagaa  
agctgctgggggctgggctgagagacacggcctgtaggtaatagaaggctccgctcggagcagtcgagggggagatc  
ggcacctcagaacagaccACCCGAGCCTCCTTCTTTTGGAGTAGAATGCCGAGGTGAGGTGAAAACGCAGT  
GGA  
CTGAGGGCACGTGCGAATCCTGCCGCATCCAGCTTCAAAGCGAAGAAGGCTGCCGGACCCCAGCGGAACAAAG  
AGTTTGG  
AAGTTGCAATGTTGTCTGTTTGTAACTCAGCTCAGCCACCTGCTAGTTGTTTACCTTGG

>NM\_001211-Human-377F310192S01\_1chr15+3824017538240875hchr15\_00075  
ggtgagattggggcagacagcaggggtagtcacctacaagagtcacgccaagtgaagcactcagagacatctccaa  
cactcaaaacagcaaagaagtctggtgcttaagtgttctcgtcggctcagagactcggctcagccgactcaa  
gacagcacctgggggtattgtttgcttaagcctgctgacttccacggccattgaatcccaaaaactacaattccat  
tatgcaccgcgagttcgggactaaacaggcataaactacaagccccagaatgccttggggcagagcgcgagagcagggag  
gagcggaggggcggtggccacgtcgaccgcgggaccgttaaattgaaacttggcggctaggggtgtgggcttgaggtg  
gccggtttagggagtcgtgtacgtgccttggctccttctgtagctccagggcaggttgcggaagaaagccaggcg  
gtctgtggccagaggaaagGCCTGCAGCAGGACGAGGACCTGAGCCAGGAATGCAGGATGGCGGCGGTGAAGAAGG  
AAG  
GGGGTGTCTGAGGTAGGTACGGGAGAAAGCTGTGGGGGCTGGGCTGAGAGGACACGGCCTGGTAGGTAAT  
AGAAGGC  
TCCGCTCGGAGCAGTCGAGGGGAGATCGGCACCGTCAGAACAGACCCCACCGGAGCCTC

>NM\_007074-Human-378EP73364chr16+3010192830102628hchr16\_00568  
ccaccatgcttagatctcagagccaggcaagagccaggtcccgggggtccaggagcgcgctcggggctcctcctcgccc  
cgcccccgcgcccctcgcccccccgcccccgccccctgctcgcgtcgcggggccgggaggaagggggcg  
cgagccggggcggggcgggaccagggcctggcggggcggcctggggcgcttctgctcctgagggaaaggctggcga  
ggaggctggggcgggagcagggaggaagaagaatgggggtgcttctgctttgacatttataaaagaagttagatt  
cgcttcccggagccggatggcagcctgctatggttggggaccaacgtggtgacgggcaggggcccgggagagaggc  
ggccgcagcgggagccccgggagcagggggcggcctggaagagctccgccccaggggcgggccacccccggagggcg  
gcagggctgcttctattcaTTGTCTTGACAAGAGCATCTTACGGGGCAGTCCCCGGCTCCTCAGCTCCTTCTCCT



CTTCCTCCTCCTCCTCCACCTCCGGCTTTTGGGGGATCACTGTCCTCTCTCGGCAGCAGGTGAGGCTGGGCCTG  
GGAGGC  
GCGGGTGGGCCGGGGCGAGGGCCACCTGTGGGGCGGCGCGCGCTGGGAGCCGCGGGCTG

>NM\_007074-Human-379DBTSS:NM\_007074chr16+3010192730102627hchr16\_00568  
gccaccatgcttagatctcagagccaggaagaccaggtcccgggggtccaggagcgcgctcggggctcctcctcgcc  
cgcccccccgcccctcgcccccccgcccccccgccccctcgctcgcgtctgccccggcgagggaaggggcg  
gcgagccggggcgggggcgggcaccgaggtggcgggcgggcctggggcgctttcgtgctgccagggaaaggtggcg  
aggaggctggggcgggacgaggaggaagaagaatgggggtgctcttgcgtttgacatttaaaagaagtttagat  
tcgcttccggagccgggatggcagcctgcgtatggttggggaccaactgggtgacgaggcagggcggggagagagg  
cggccgagcggggagcccgggagcgagggcgggcctggagagctcccccaggggcgggccaccggggcggg  
cgcacggctgcttctcattcATTGTCATTGACAAGAGCATCTTCAGCGGGCAGTCCCCGGCTCCTCCAGCTCCTTCTCCTC  
TCTTCCTCCTCCTCCTCCACCTCCGGCTTTTGGGGGATCACTGTCCTCTCTCGGCAGCAGGTGAGGCTGGGCCT  
GGGAGG  
CGGGGTGGGCCGGGGCGAGGGCCACCTGTGGGGCGGCGCGCGCTGGGAGCCGCGGGCT

>NM\_002090-Human-380hchr4\_P015544chr4-7526932475270024hchr4\_00153  
gctgactttcacagagatgatgtagatgtaacgtaaacgaaatgagagaggcagagaccggga  
ggtaacatagaggatagactatagagagagatagctgagggaaaactcgctgtctccgggtccccagaaatctg  
ataactaaggagacaaagctcttctctctaaagaagtcgtgctttcctgtcctggttctcaggggtccccagctct  
ttctccaacctaccctgacgccccgggggtcatcggggacctaaaggtccccctcagaggtgatatctcagcaggtg  
gactcactgccttccaggaattggggcagaaaatgaataccaaagtcacagagtgacaggggggtactctggaggg  
cgaggcgtaggcgtcaccagtgggtctcccctaccctatccgactccaccggggggggggcctgccttctcctcg  
gactccggatcgatctggagCTCCGGGAATTTCCCTGGCCCCGCGCTCCGGGCTTTCCAGTCTCAACCATGCATAAAA  
A  
GGTTTCGCCGATCTTGGGGAGCCACACAGCCCAGGTCGCAGGCACCTCCCCGCCAGCTCTCCCGCTTCTCGCAC  
AGCTTC  
CCGACGCTCTGCTGAGCCCATGGCCACGCCACGCTCTCCGCCGCCCCAGCAATCCC

>NM\_002993-Human-381EP73641chr4+7506693175067631hchr4\_00307  
tgctatcagcttaaggagatttggggtgagaccatgggggttttagatatacaattatgtaattgcaaataggga  
aattgacttctcttttctaaatgaatacccttatttctctcctgcctaatgtcctggcattggagaggagga  
gcatctccagacagctgcgtgctcagagaagccagcctcgtaaccctcaagcccaggggatgagacctgctgaat  
cgctgctctatttgggtggagccacagctcctccaccgccccggggcggggctaaaatgtcctccccttaaggagcagg  
cagctcctccagccaccaccaccaattcccctcctcccccctccaccaacccttcttccactgcccc  
tgagttcaggggaatttcccagatcccaaagcttgagtttctgagtcgggagggatgaatgcagataaaggagtg  
cagaaggcacgaggaaaccaAAGTGCTCTGTATCCTCCAGTCTCCGCGCTCCACCCAGCTCAGGAACCCGGAACCC  
TC  
TCTTGACCACTATGAGCCTCCCGTCCAGCCGCGGGCCCGTGTCCCGGCTCCTTGGGGCTCCTTGTGCGCGCTG  
CTCGCG  
CTGCTGCTCCTGCTGACGCCGCGGGGCCCTCGCCAGCGGTGAGAGCTCCTGGCACTGG

>NM\_002993-Human-382DBTSS:NM\_002993chr4+7506693075067630hchr4\_00307  
ttgctatcagcttaaggagatttggggtgagaccatgggggttttagatatacaattatgtaattgcaaataggga  
caattgacttctcttttctaaatgaatacccttatttctctcctgcctaatgtcctggcattggagaggagg  
agcatctccagacagctgcgtgctcagagaagccagcctcgtaaccctcaagcccaggggatgagacctgctgaa  
tcgctgctctatttgggtggagccacagctcctccaccgccccggggcggggctaaaatgtcctccccttaaggagcag  
gcagctcctccagccaccaccaccaatcccctcctccccccctccaccaacccttcttccactgcccc  
ctgagttcaggggaatttcccagatcccaaagcttgagtttctgagtcgggagggatgaatgcagataaaggagtg  
gcagaaggcacgaggaaaccaAAGTGCTCTGTATCCTCCAGTCTCCGCGCTCCACCCAGCTCAGGAACCCGGAACCC  
CT

CTCTTGACCACTATGAGCCTCCCGTCCAGCCGCGCGGCCCGTGTCCCGGGTCTTTCGGGCTCCTTGTGCGCGCT  
GCTCGC  
GCTGCTGCTCCTGCTGACGCCGCCGGGGCCCTCGCCAGCGGTGAGAGCTCCTGGCACTG

>NM\_024898-Human-383DBTSS:NM\_024898chr19-64325986433298hchr19\_00527  
taggactccctatcttccatgtctgtctgtctctgtcactcggttctgtctgtgatgacttctgagcgt  
gtaactgtctgtctgtctgtctgtctgtcctgtcctgtacttctgtcttctgtcccatccctggcccccca  
ccgtccactttaacaggtggctccctctgggtggccaccagtaccgtccaggccaaatggaccaagggaagagacgggg  
aggcatttattaatagacagactgtgaatcttggctgtcgcggagcggggaaggagagatgagggccaggcacgatgg  
ggggaaccagacacagtcagcctggcggggacggagctgggggtctgccttcccaggctgaccactattgccacca  
tcccaacataattagcaggcaggtgcctgggttctcacgggggtggggcaggcctctgtccggggacgtcacccg  
ttaacttctctctcagcACACAGGAAGCTGAGCCGGCTTGGGGCCAGCATACACAGGCCCCAGGACCCCTGGGG  
A  
GAGGGCCCCGCTGGGCTGGCCCTGCAGGGACCATGGAATCCAGAGCTGAGTAAGAGCCACCCCATCCCTCATTC  
TCTGGT  
ACAAGATTCCCGGGCCAGGCCTGAGCCGGGGCAGAGGGGAGCTGGGGCTGGAGCAGGCCC

>NM\_024898-Human-384hchr19\_P039537chr19-64277896428489hchr19\_00527  
cccctccactcccaccaggtcaccgagcagaggaaacttctcaaaatctgttccagcagtcctgtctgggccccag  
gcctcagtggggcttagctggtgagtagctcccattcctggcgctggaccttaggtggatgggaaggctgcgtcca  
gccatcatgaccacagagtcgtccttccccagggcagcggagtacggctccagcgggcagggtatccccccccct  
accgggggaatagcaagccggtgagcggggctcggggaccctggaaggtcgggggtccaggtgagccagcctctgac  
tgattgatccccctgccaataccccaccagcttctctgtcttctgtggccccggactccggccgctgccatccatccctg  
agaacgtgagtgaggaggggtctctgggggtgagaacaggtcccgaaccggaccggggatgcaagatccaggggcccg  
tccacgccagagcagctctCTGATCCTCAGAGGAACCTAACGGAGCTGGTGGTGGCCGTGACTGACGAGAACATCGT  
GG  
GGCTGTTTCGCGCGCTCCTGGCCGAGAGAAGAGTCTGCTCACCGCCAGCAAATCAGCACCGTGAGGCGGGG  
TCCGCCC  
GGCCGGGGTGGGAGCAGGGCCTGGCTCCGCCCCGGGGGGCGGGACAAGGGGGCTGATTCC

>NM\_031471-Human-385DBTSS:NM\_031471chr11+6373025063730950hchr11\_00412  
atgagttgaagtagcctacgagctaggaaaaactgcaaaatggactgttccctctggggccttgagggatcc  
ttggttagaggatagccaggtcggagccgatttaacctgtgagtcctcaataacctggatacactctgtcactcctg  
ggctctccctccggcagcccagtgatgttcaagcccaagggtcccccactcatgtgacaggctgaggatggcagacact  
tcccacaaaagtggacctagcccgaacacacacagccggggacttgtgagttgactgagcttccctcaaatgag  
gaagggggcgttttatggtgtgagtcgtaagccccctctcctagcttctgtctctggggacaaaggtgggg  
gggcccctggaacctctgtgggctggcagtgcttctgcacccagcggcagcccctggggaggggctgaaccg  
ccctgctgtgataaggcacAAGCAAGGGCTGCCCTGAAGGAAGCTCCAAGAGAAAGGAGGGCAGGAAGCCCACGGC  
CC  
ACAGGGGTGTAGCCCAGACCCACTGCAGCCCCAGCCCTTGCAGGAAAGGTAAGCTCAGGCCTCACTGGG  
ACCCTGG  
GCCCTTCTCTTCTTATCCTCCTGCAGCCTCTGCCAGCCTGCCTCTCGCCATGCGGCAG

>NM\_031471-Human-386hchr11\_P007529chr11+6373430663735006hchr11\_00412  
ctgttaaaccgtggattatgggaggacagggggcgtcatgtggaggagcccagtgaggctggaatgcaagatgggg  
cgctaagattggggcactcagatgctgggtggagagctcccctgggaagcagatagaagccaagcctagaaggccaaa  
tcaggggctcctgcagagaccctgctgctgtaccatggggtagacccagccgcccaggctgcccactctggc  
ttaggcagggcaggggagtgctgccccaggcttctgaatcctgggggtgtgctgggtgtgggggaccagggggaag  
gttgaccagatgtgccccgtgcccacagatcgaagcaggactggtcagacctgctatttggtgggaacagaaga  
ggcagtggtgctgcagaccactggacactggacaagtacgggactctggccgacgcagcctcttcttgggccccag  
caccgccccctcatcctctgGTTGCCAACCGCCGCGCACTGCGCCTCCGTGCCAGCTTCTCCAGCCCCTCTTCCAGGC

TGTGGCTGCCATCTGCCGCTCTCAGTAAGTTGCCCGCTGATTCCCCTGGCCCACGAGGGTGATGCAAAGAG  
GCAGGT  
TCCCCGTTTCCAGGCCAGCTCTGTTGACGCTGTCCCTTGCTGTCTGGGTTGCCACCCTG

>NM\_031471-Human-387hchr11\_P007530chr11+6374274463743444hchr11\_00412  
gatccctcttgagctctctgcttccagttccttttctggaatcctcttctcagcttcccttgagtgccac  
tgtcatccttctctactcagcttgcacctcctcaggaagccttccctgactgctcccatgttcattctgt  
catctcattgaacttggggggccttagactgaggctcatgtgagcttccctgtgaaactgttccctgatagtt  
tattgagccttgattattgacttattgattggttactcggtctctctgcaccagggcagcatgccagcacag  
taaaccatcagcacaaccaagccaaggttagactgagcctgggagcagggggctagcaggctattaaggatggggt  
tgaggtctgtggccatgtctggccactgaatgaatctgcctcagcaaggagggcagggcagggccaaggctggcagg  
ggctcagtgaggcgtccaGGCAGCTGGCATCTGACCAGCCCAGCCTCCAGCCTCCTCCCCCGCTCCAGACAGA  
C  
CCCGTGGCGCTGACACAGCTGTATGAGCAGGCCCGGTGGGACCTGCTGCTGGAGGAGATTGACTGCACCGAGG  
AGGAGAT  
GATGGTGTTCGCCCCCTGCAGGTACCAGGCGGGCCTGGGGCACCAGGGCAGGTGGGAG

>NM\_016095-Human-388DBTSS:NM\_016095chr16-8427985984280559hchr16\_00582  
aggatcgctggagaccggaagttaagaccagcctgagcaacacagcaagatcccaatccagaaaagttgtaaaaa  
ttaaataaaataaatgcgttactcttggcccatcggaacgccggcgtagaagcggcccgaaccccccccggt  
cttgattagggcgtttgcgccggcgccggggacaggtgaagggacaccaaagctggcgcggcggcaggatctga  
cagcgcagggtgcacgcccagggcggggcggggcggggctgtccgcgggcccggggcggggcggcg  
cgcagcctcctcggccttccaatccgaggctcttcgagcgcgggtctccgccccccgcccgcagacagcgcctat  
aggctgtctaccgcttctataggtggcgcaggccgttccggcggggcgggctctcgcgggggaaaacggc  
ggccgcggcgtctctccggGACGCTGAGGGGCCGAGGAGACCGTGAGGCTCTGGCCTGCAGCTCGCGCCGATGG  
AC  
GCTGCCGAGGTGCAATTCCTCGCCGAGAAGGAGCTGGTTACCATTATCCCCAACTTCAGTCTGGACAAGATCT  
ACCTCAT  
CGGGGTGAGGCCTGGGCCCGCGTGGGGAGGGGAGGCCGGGCTGGGCGCGTCCGGGGCTC

>NM\_016095-Human-389hchr16\_P017571chr16-8427865884279358hchr16\_00582  
agatcggtggcctcgaactctgggtccccagggatcctcccagctcggcctccaaagggtgggattatgggca  
aaagtcggctttgctctgtttttgtctttatctttgagatggagttcgtctatcggggggcgggaatgcagt  
ggcgcgatctcggctcactcggcctcgcctccgggtcaggtgattctctcctcagcctcccagtagctggatt  
gtgagccccgcggcggcgtttcgtttcagatgagggagggcctcggcgtgggagcttgagagaaggaggg  
caggctctgtacctgccagaccactccccgacccaggaaccaacattgggtgtgtaaactgttccggagttg  
gagggtgcaggcgggagagggagcggggcggggcggggcggggcggggcggggcggggcggggcggggcggggc  
tgagccccagctcaggtGTCTCGGAGCCGCTCAGGAGGCGCTTTGTTCTGAGTCTGGTAACAGTTGGGTTTTTAT  
TA  
ATTGCATTTGGACTTCAGCCTCTGCAATGCCTTGCTTATTTGATAGCAGTAACGCACAGTAATGCTTTTT  
TTGTTCT  
TTTTCAATCTTACGGGAATTGTTTTACTTTTTGGCAGGGGGACCTGGGGCCTTTTAACCC

>NM\_001560-Human-390DBTSS:NM\_001560chrX+117642895117643595hchrX\_00725  
ttcacaagcacagtagctccaggtcccccaactccaccagtgaaagtagggctggtattactaaccctggagtcagc  
ctagcaaaacaagggtcagaggtcaagggtggaagccaggtctccagactcccagggccaaggctctttccgagatga  
ctctgtctgtgtccagcagggcacagcccctagcacctccgaggccccgaagtgtgtggcagcggcgacgccggt  
ccggcacgcgggagggagggcagggcagcggcggagtgaggcggcgagctggggaagaagttttgtcggtagaga  
ccggacgcgggagctcgggtgggccaaggtgtccagcctgggagcgtaggagccgagccagagccgagagccggc  
gccccgccccctctccggcgtctcggcgtcaggttacctgaggcgggtggggcggggcggccttccgctcgc  
gcccggccccagcctccaggGCGGGAGCCGGGAAGTGGAAGAGGGAGCGAAGGAGGCGGGGACTGCCAAGGCTCC  
AGC

CCGGCCGGGCTCCGAGGCGAGAGGCTGCATGGAGTGGCCGGCGGGCTCTGCGGGCTGTGGGCGCTGCTGCTCT  
GCGCCG  
GCGGCGGGGGCGGGGGCGGGGGCGCCGCGCCTACGGGTGAGTGCACCCTCGGGGCCGA

>NM\_001560-Human-391AB031393\_1chrX+117642860117643560hchrX\_00725  
atgtattccagcttcaaatatgccctttgtccttttcaaaagcacagtactccagtgccccactccaccagtg  
aagtagggctggtattactaacctggagtcagcgtagcaaaacagggtcagaggtcaagggtggaagccaggtc  
cagactcccaggccaaggctctttccgagatgactctgtcctggtgtccagcagggcacagcccctagcacctccgag  
gcccccaagtgtgtggcagcggcgacccggctccgccacgcggaggaggaggccaggcagcggccggagtggcg  
gcgactggtggaagaagttttgtcggtagagaccggagcgggagctgagggtggccaggtgtccagccttgggag  
ccgtaggagccagagccgagagccgagcggcgccccgccccgctcctccggcctctcgggctcaggttacc  
tgaggcgggtggcgggcgGCCCTTCCCGTCTGCGCCGGCCCCAGCCTCCAGGGCGGGAGCCGGGAAGTGAAG  
AG  
GGAGCGAAGGAGGCGGGGACTGCCAAGGCTCCAGCCCGCCGGGCTCCGAGGCGAGAGGCTGCATGGAGTGGC  
CGGCGCG  
GCTCTGCGGGCTGTGGGCGCTGCTGCTCTGCGCCGGCGGGGGCGGGGGCGGGGGCG

>NM\_001560-Human-392hchrX\_P007403chrX+117643696117644396hchrX\_00725  
cctcgcgagggccccgcctcggcggtcggctcccgcgaggatctctggggcccggactggggccggttcgaggtg  
ggaccgggagctcgggggtttccgaactccgggtcggcgaggtggcgagcgaagtaagagggtcgcactgtg  
agtgggaagagcccaggaggtggcgtccaggcgtcggggcggggggcccgaacatgccacggcgtcagaggggcg  
tgggtcagcgggaatgtcctgtgagcccgggagaaatgaggcgccagagccggcggggaccacgaccgaagtc  
aggcgagctgagaacgcgggggctcttggccgagggcgccaatctcactgtctaagggtggctcttgcagtg  
aagttgaaggaaaccttaaacatctcagctcttggtaaaaaggacgtgacgtcatgacctccttggcgctgaagaa  
atcctttgggaatccagaaTAGCATCCCGCAGATGCTCCCCCACCCTACTCTTTAATAAACCTTATATTTTAGG  
G  
TAATTGTAGATTTATGGAAAAGTTGCAAAGATACTTCAGAGAGTTGTGTATATCCCTCACCTGTTTGTAAC  
TTCTAGT  
TAATCAACCTGGCAGTTGTGAAAATTGGGAGTTAATGACTTCCTTAGGAGCAGCTCCTG

>NM\_017839-Human-393DBTSS:NM\_017839chr16+5409998454100684hchr16\_00732  
tctggagaaccatctccccctgtcagtcattatgttttagtgaacaaattccactcctagtccatcatgggtgta  
ttaatattagctacttaatggaacagccagggaagtggttctcaatggcattactggatccaggttaggattatct  
gagaatacattatctgcattttacggaaggcaaccgaggtcatagagatagtgattggccagcgtcacaggcccagt  
aaaagggtgaaaatccaggtccgtccgaccctaaagcagggaactctgctagtgtcgtctgtggaatgttagggat  
cctggggtaccttcagggtcttggctcggaaaggaaaacattcccctccgaggggatggactatattaccaagggggtg  
agccagatgcctgaggggtgtggccagagcctggggcgtgtcacagccgaaggggagggcgagcagcaggcgtcta  
agtaactcagcgtcgcAGAGGCTCCCAGCGTCGCCCTAGGCTGGGACTCTAGTAGTCTTCGGCTCAGTTTTGG  
C  
TGCAGCGCCCGGTAGATCGCTTCGGCCGGGTTCTACGCCCGGCTCAACTATGAGCCGGTGCGCCAGGCGGCG  
GAAGTG  
GCGGCCACAGTGCCAGGTGCCGGCTCGGGAACGTGGGGCTGCGGCCGCCATGGTGCC

>NM\_017839-Human-394hchr16\_P009561chr16+5410051454101214hchr16\_00732  
actctagtaggtctcggctcagtttggctcagcgcggcgtagatcgtcggccgggttctacggcggctcaact  
atgagccggtgcccaggcggcggaagtggcgccacagtgccaggtgccggcgtcgggaactggggctcggccg  
catggtgccccgtaggcgtccttctccgcccgggtgccgaaccctcgtgagcagacgcagatcggctccgga  
ggcgggtccaggtgagggcggtgggtctgaggggagaggtggtctgagggggcctaggtcagaggggggtccaggt  
gggtggtggtctgagagaggagggcgccgaggggggctgggtctgagggagtgaggtggtcagggcgagagtc  
tgaggagggaggtggcctgaagggggcatgggtctgagggggaggtggcccaggggagcaggggtctggggcggtcc  
aggtgactggtgtaggtctgACGGGGGAGGGCGGTCGAGGGGCGCGTGGGTCTGAGGGGCGTTGTGGGTCTGGGAAGC  
AA

AGGCATCAGAGGAAGAAAGAGCAGTGGATCTGAGAGGAGAGGACTTCTGAGGGGCCGTGAGCCTGAAAGGGG  
CGGAGATG  
TGTGTCTGAGAATTGAGGACATTTAGAGGATGGTCTGAGCGGGCACGGGAGGAGAGAAGA

>NM\_017923-Human-395DBTSS:NM\_017923chr4-164892100164892800hchr4\_00259  
ttagtgaatgcactcaactttatgctaataatctgatgtttcaggctttcttattttcagacttagtatggttataggg  
ttaaagatatgaaaggccaatagtggtgcaagggatattttattagtttcattaatgaaatttaataagcaataaat  
tcaggcttttaaatattacaaagtattttcaaatatctcatggggccttgatgtagcttcaggaagtatctagcaacct  
aatggctgtttgattagacttctcagactattattatcctgtcacataatagtgcttagtccatgtatcataggatct  
tcaagtattattcattgtttccaagcaaatgagctattccactcaaatgattacagtaaatagaatagaactgtg  
gaatcatcttctctcgtaaatgaagtaacagcaaaatagcgcagcatctcagctgtccaggttctctcaataagtt  
ttacttttgcaaaccaaccTCAAACCTTCTATATTCTCTGTCTGCATTATAAGCAACATGACCAGCAGCCACGTTTG  
T  
TGTAATTTTTTTAAATATGTGGAAAAAAGCAAGATATCAACCATGTATTACCTTAACCAAGATGCCAAATTA  
TCTAACTT  
GTTTCTCCAGGCAAGCAGCCCAACAACAGGGACAGCTCCCAGGAGCCAGTCAAGGTTGTC

>NM\_002581-Human-396hchr9\_P007320chr9+115995124115995824hchr9\_00770  
ataagtggggggagtgagggagggaaaaaaagcaagcaaaaacaaaacaggaatgtgtgtttgagcaggaatga  
gagctgggaggaccgtaaggggtgtgtacagaatcttaaatgttactttaagattgtctccttaaaaaaaaaaaa  
aaaaaaaaagagagagagagagagagaaaaaggaggggggtggtggagaagcgggagcgaaggaaaggaggcaaaaggcaaa  
gtgaaggaaagctggatagctcggcctctcaaacgattgattagtcagatccccgagtttaacagggactcattc  
aattgggaaggtggagcgtggggagcagattagcatacgttactcatctctgagggattttttcccctcttt  
cctttcattttgagaagaaggagggaggggggacttggggggggagaagggggctgtggctgtgtataaagga  
cgcaaaaaataataaattaGAGCATCTTTTGGGGGGAGGGAATTCAGCGGATCAGTCTTAAGAGGAGCTTTTTTTTTG  
GA  
GCGAGAAATCATATAAAATAAAATGAAATAAAACAAGGAGGAAGGCAACCAGCTGTTAGGGGAAAAATAAGG  
CAGATAAA  
GGAGCGGGGAGAGAAATTAATTGCCAACCAGGAGGAGTTGGGCTGTATTTTTTCAAAGGTG

>NM\_018492-Human-397EP73116chr8-2775103927751739hchr8\_00132  
ccacggccatcccctctggggagcagatgttctaaataatcgttgaataaataagaatgttgaattgaatgtggc  
aattacatgagtagcaacatttctaaatatcttttttccctcggctaaagatgattgttcttaagctacgcatttg  
tctttacagtgttcaaggcctcataaacctataataaaattgacgtcataatcacgacacattcaacacagatgtgagc  
gtttggagagagcttcagcctcagcaaggcaactgtgttctattaccgggctgtgctcctcggaagggtggtggt  
cctgtaaaagttgtgctccccgccttcttctcctcctcgttggcgctgcgggaccgggagctctgggaga  
gggaggaggaacggcgaatcggcggggcgtgtccttcacgcccccgtagctcggggccgaagctggcgcagcgcgcga  
cttttgaaagccaggaggTTCGAATTGCAACGGCAGCTGCCGGCGTATGTGTTGGTGCTAGAGGCAGCTGCAGGG  
TC  
TCGCTGGGGGCCGCTCGGGACCAATTTTGAAGAGGTAAGTGGCCACGACTTATTTTACCTCCGACCTTTCTT  
CCAGGC  
GGTGAGACTCTGGTAAGAGGAGCTTTTTTTTTTGGCAGCCCTGGCGGGGGCCGAGCCCGGA

>NM\_018492-Human-398DBTSS:NM\_018492chr8-2775104027751740hchr8\_00132  
cccacggccatcccctctggggagcagatgttctaaataatcgttgaataaataagaatgttgaattgaatgtgg  
caattacatgagtagcaacatttctaaatatcttttttccctcggctaaagatgattgttcttaagctacgcattt  
gtctttacagtgttcaaggcctcataaacctataataaaattgacgtcataatcacgacacattcaacacagatgtgag  
cgtttgagagagcttcagcctcagcacaggaactgtgttctattaccgggctgtgctcctcggaagggtggtggt  
tcctgtaaaagttgtgctccccgccttcttctcctcctcgttggcgctgcgggaccgggagctctgggag  
agggaggaggaacggcgaatcggcggggcgtgtccttcacgcccccgtagctcggggccgaagctggcgcagcgcgcg  
acttttgaaagccaggaggTTCGAATTGCAACGGCAGCTGCCGGCGTATGTGTTGGTGCTAGAGGCAGCTGCAGG  
GT

CTCGCTGGGGGCCGCTCGGGACCAATTTGAAGAGGTA CTGGCCACGACTTATTTTCACCTCCGACCTTCTCT  
TCCAGG  
CGGTGAGACTCTGGTAAGAGGAGCTTTTTTTTTTGCGAGCCCTGGCGGGGGCCGAGCCCGG

>NM\_013385-Human-399DBTSS:NM\_013385chr22+3600252936003229hchr22\_00132  
aaagcccttcctagcagtgcaattcatttctctctcaagtgggagttggaagagagcttgggggtggaacacagggg  
gccctgctaggactgtccaagttgggcgctcctatggcatatatgtgaggaggctgccacgtgaatgccatggtccct  
ggaaaatgttcgctcctcagtgcaacatcgccctcggtgtctgtcatgtgtacgtgtgtatgtgcatatgtgtctgtgtg  
ttcttctgtctcactgtcttctctttttatctggcctcccctcacttcatctgtttgtttgtttgtttgtttgtt  
gtttccacctgtccctccctggcaaaagtccctgtctgctcaaaactctgccagtttttaggaagtgtgtttgtcaa  
aagcctgcacacgagacccccgtgggcccaggactgacttctccccacacaggctgggcccgggcaagcaggaaggagcc  
tgttacagtcaaggtgacgcATCCTTGCCGGGCCAGCCCCAACAGCAGCTGGGTCCGCAAGCGACAGGAGCACGGGTC  
AT  
CTTTTCCCCAGAGGCGTCGGAATGGACCTGTGCCACCCAGGTAAGCAACTGCCGTCAACCTCTCTGGGCCTCAG  
GGTGCT  
CTCTTTTAGAATGGGACAGCAGCCCCTGCCTCACAGGGTCCTAGATAAAGGAATACAGCG

>NM\_013385-Human-400hchr22\_P003911chr22+3602062636021326hchr22\_00132  
tgggaaagtgtttaaaactggtccacagtgagtgcttagtaagtcttgatgtcttgaaaactcagattccgagaagga  
gcatctgatctgggcttggagggtgagtaggagttcacaatacagagaaggaagaagccaccacatccagtgctct  
aactcccagctctttaagggagaggggtaggtgactgggagctcccataattcattcttcttattcattcacaat  
tcattcattcacttatttactgagccttctgtaggtgccaggactgtgtgaagcccaggaggagaagtgagagat  
acaggcccagttctcacctcagagaacttagcttgaagctgtcgaaaccaccaactccagagctagagggaagtgcag  
gttccaagaagggagccctagcaaggcaaaacccctgcccacctcttcccaactaggtcccacagccagatctcagg  
gccc aaaggccaggtgctgggGAGCCACAGACCCGGGGCAGGCAGAGGCCGTCCCCCTTCCCAGCTGAGGCAGACTGG  
GC  
TGCAGTCAGTGCTGGGATTCAGACCTGCAGAGCGGGCGTGTGCTTAGTTCCGTATTCTGCAAGAAAAGGCAT  
TTCTTGG  
CTACCTCCC GCGTGCTTGGGGCTCCCTGGTGCCATCCC ACTTCCCCGTCAGCCCAGATG

>NM\_004288-Human-401DBTSS:NM\_004288chr2-158125909158126609hchr2\_00004  
gcagataaatgtcttttgatgaacattaatgatctagggtatacttcagggaaagtacagtattacaaggacttcgag  
agagaacattatgaccggcactgtaattctgcccataattcacaagaactgaatgtcctcgtgtgctgacttctgcatt  
gcattgctaagttaagtaagagaatggatgggaaacaaatggtagcacttggggacattttcttctctctaaagaa  
aaaaatggcaaatgggtgtgaatgcaacttcccacagaaacataaaagcgaagaattctggctgttgagggtgaaaa  
ataagttgattttcttaaatgtaaaaattagctccaggttctcagagcttaagaaaaaaagcttgagaaatg  
ggagtgaatagcaagataggggtgtgtaacaagttcctcaaacacagaggtcacatgggctcttctgctttgctact  
tttgattactgtcacagttGTA CTTTTAGCTTCCCCATCCTGCAAGGCCACTCAACCATGTGCTAGCTGGAGTGATCT  
TTATTCACAATGTCTTTACAAAGGCTCCTGCAACACAGCAGCAATGGCAATTTGGCGGACTTCTGCGCTGGGC  
CAGCGTA  
TAGCTCTTACTCCACTCACACTCACCGGCAGCCTTACGATGGACGATAATAGAAGGATTCAAAT

>NM\_003005-Human-402hchr1\_P90227chr1-166330864166331564hchr1\_00312  
ttcctttcacatgacctatgtctatttaatacgtcattttgaaacttaccataaaaatttccaagcggcagaaaactgt  
tagtggtcttttccatttctctctattttttgtgctactaattttgcttcttccctcagaaggctgcccgaatagt  
aaacattcactgacatgtcataattactgaaaaatgggactggaaaatcacattgtaattaattcaaagcatgttttc  
aaatgtactactttaaattggagcttatatcataatccaaggaaaccttgtgtgtactgttcccacattgctcagcc  
tgggatatccaggagtaattcaccttgcgctgctccagaccatcttccatggaaggggtgacccttgcctctggc  
aaccactatttcaagctgcaacattactcttgattatcaacattcaacttcatgggaagggtgtggtgagtttct  
ggaatgtgaataggaagttTTTTCTAAACAGCCTGACTGAGGGGAGGCAGTGAGACTGTAAGCAGTCTGGGTTG  
GG

CAGAAGGCAGAAAACCAGCAGAGTCACAGAGGAGATGGTGAGTTTATTTTTTCTGCATGGGAAGTGGTTGA  
AGTGAGTT  
GGAGTGGTATGGAGTAAAGTCAGGCAGGTAAGGTTTCAGAAAGTGAGGAACAGCGATAGC

>NM\_138484-Human-403DBTSS:NM\_138484chr3-2020250120203201hchr3\_00208  
agaaacatggagctagaatttcaggtatctgcagttccctaataccttttaaccagaatttgctcctgttttgg  
tttaattcctcctaaaagctgctccgtgtgcaagctggctgaccgctttaacaggcaaccaagagattcttctca  
gagggaggtttgagcacaaccgggacattgaagctgtcagactgaagaaacaggaagcttgaactacatcacac  
tcggcctaaaggtttcggagtaactccaccgtaaaatccccacgactctgattagaaagctccggcggtcgccgaga  
cccgaccgaggtcgcgccagggccaggtggatgcccggatgtggacttgagcgaatgtgcgtcacgtgacgtcgct  
ggcgggcgggactctgcctgcgacgggtgtgtgggtgcatctgcgccagtgaccgctcccagccaaccaatggag  
gagcgaggcggaatttcgAATGTGGCGGCGGTAGTTCCAGGCGACGGCGGACGGTGGTACGGTCTGGAGGGCCCA  
GT  
GCGCGGGGCTAGCCGTGGCTGGAGAGCTTCAAGAGCCTTGAAATGTGAGGAGGAGGAAGATAGCTGTTGCAG  
AAGTAGT  
GGCCAAGGTATCGTTCTGGACGCGCCTGCGGCAGGAGGGTCGCCGCGTCCACTTCCGCCA

>NM\_015359-Human-404hchr8\_P002239chr8+2228016822280868hchr8\_00684  
caactttgggttagtagggtctttagcgtctgatcattgtgggaagcggctcgcatcaagtctgaaaagtgaatata  
atatggtttatttgaactcgaccaggaaatttggttctttggctggtggaaatatgcagaagaaacaccatcaagg  
gcgctcccccttgaagtaccttccgaactgggaggggaagagaaaagcttttgggtgaaccagaagtggtaaaatc  
acattcaaatagagtgggttaggactctcctccagggggtgtggggtggaggctaggcggtgagagcttcccgcgccagg  
gagcaggtcttcacgggaggtttccggaggcaggaggagcctgcgggtcctcgggagtcacggccggatgaaggatggga  
gcgggcgccgaccacagccaggccgagggcagggcgagggcgagggctggccaggctcccagcctgcccggccccacgtg  
gcagccccggggcgagcgggGCGGGCCGGGGCGGGTCCGGCCGCTGACGCGCCGGGTATATAGCCGGGCATGCGCGC  
GG  
TGCCGGGGCCCGACGCAGTGAGGGGGGTGCGCGCGCTGTCTACGCGGACGCACCGGCTAAGCTGCTTCTGCC  
GCCGCC  
GGCCGCTGGGACCTTGCAGGTGAGGCTGCGCGGGGCGAGGCCGCTCCGAGCGCCAGGT

>NM\_002160-Human-405DBTSS:NM\_002160chr9-114959786114960486hchr9\_00226  
gaaacccccaggctttgaagggtttatctcctttccaggaactgggctcagtcctgtactcgtccgaggtgcc  
actgagcagctgctgccagagccaggcagccctggtccatttccagcttgaccaagtacaagaggggagccagggc  
tgcggtactactcctcttctccccaggtacccgtctcacaattagaaaaccgtgtggggagcaaagcaaaaatcac  
attcactaacagctactcggggtcggggcgggcagggcggaattcctactttcgccataaattgatgcaaatgggtt  
cctcctggccgagagccaggagtgcgtcttcatgagtaaccctgtccgctgggagggctgttctttaa  
cgccaactgaaaaagtggaaggatgtctggaggcagggcgtccattacagaggaaggagctcgtatataagccagc  
caaagttggtgcaccggccACAGCTGCCTACTGTACCCGCCTCTCCCGCGCGCAGATACAGCCCCCGCTCCGTG  
G  
GCACAAAGGCAGCGCTGCTGGGGAACCTCGGGGGAACGCGCACGTGGGAACCGCCGAGCTCCACACTCCAGGT  
ACTTCTT  
CCAAGGACCTAGGTCTCTCGCCATCGGAAAGGTAAGTCTGTTTTGCCCTCATCACTAGA

>NM\_007115-Human-406DBTSS:NM\_007115chr2+152039113152039813hchr2\_01066  
ggcagagaataaggaagtcataatcactggagaaaaattagatttccaagctgtgcatacttttgttttaatttt  
ttacacaggcttgacaatgtttgaaaagccagtcacaattaccaataaaagattaggtttaacccatccataa  
ttgacactgcaataagacatttagattatctgaaatcctactgaagtcgattttctttaaactactgtaaatc  
tgcatacaagttacaaaacttctaacagaaaagtgtttgtactaacaataaatgaactccgttcttagtaagtaatt  
ttaaacaatagatgatcattctatctccttagtttgggtgcaaatgcaaatgagtcagaggattgcttcagacactga  
gataattgtgtaactctacagcggaatgcccattggagagtactgtgacctcacagttgaaaaaactatttaaag  
atgtgaaaccagatgtttcAGTCACATTTACGCCACTGCTCTGAGAATTTGTGAGCAGCCCCAACAGGCTGTTACTT  
C

ACTACAAC T GACGATATGATCATCTTAATTTACTTATTTCTCTTGCTATGGGAAGACTCAAGGATGGGGAT  
TCAAGGA  
TGGAATTTTTTCATAACTCCATATGGCTTGTAAGAACCTTCACTCATGAGCCTCTTGTTG

>NM\_006670-Human-407DBTSS:NM\_006670chr6+8313023183130931hchr6\_00142  
ggttggccaggggctgggtgctgaagagagtcggcgcccgaacgaggagccgggaagtctgctactctggtggaac  
tcagagttggttctggaggcggcgagcgcggaggtgagcagtgaggagcccggcctgggagagaccgggaggcgtcgt  
tggggcccctcccctcctcgggtggagagtagggttgggtcgggtgcccactgtaccccaggtcccactgctgcttgt  
tcccagactcctcccctccttggagatgacttgaacccttgagatccgaggggctggcggggcgaggctgggggg  
cgacagtttagctccacttctgtaatgcgagaaggtacaaaaagagatcaaaaagtctgtaacctgaaactcct  
cgatcctaaccgggacctggtggagaggtctggcgggggcgagacaccggaggccgacctcggcggaggcgtgct  
aggaaggaacgggagaggaGAAGTTTGGTAGGGAAGGAATTGGGGATTAAGCGGTAAGTTAGACGCGGGAGACGA  
GTCT  
CCTCGGGAAGGCGGAGGGCGGGAGGCCGGTTCGGTTTATTTAGTGTGGCCAGGGAAGAAGGAAGACTTTGC  
GGTCTGG  
GTGTCGGATGCGCGTCCCCCTCCGGAGTAAAAGTGACCGGAGGGGTTGGGGAGGCGAGGC

>NM\_006670-Human-408hchr6\_P007866chr6+8312962983130329hchr6\_00142  
cttttttttcttctctctctctcttaaagtggcgctctcttcacaagttccatcactaccaagaagtga  
ggggggcggggggcagggcgggaaggcattaatacactaaatctgaagttgcccctcaagtaccactttgatgggg  
agagcttctgaagcttcatacaacctgccgtgcttctgctgctccgcagtagatttcagctatttcttctgctgc  
tgcttcgctgctctgtcatgctaaatctatctcgtcactgccaagggtgctgaatcagggtgaattccacgagatt  
caccagcggtttctcagtcacaaggtaaatacagatgcaaaatgaggaaccaccaaggatgtcggggaggggggag  
agaaaggattccctcacctttccggcacattcctgtaattccaccaggaggaggcgcgcagcccagctcccctag  
tctctcttctaaatccccTACCTACGGCTGCCGAGGTTGGCCGCGCGTCGGAATCTCCCCGACAGTCCTGGCCCTCC  
CCCGCCCCCGGTTGGTTTTTCCAGCTGCGGAGGTTGGGAGGTTGGGCCAGGGGCTGGGGTGGGAAGAGAG  
TCGGCGC  
CCGCAACGCGGAGCCGGGAAGTCGTCGCTACTCTGGTGGAAC T CAGAGTTGGTTCTGGAG

>NM\_006670-Human-409hchr6\_P007874chr6+8313081383131513hchr6\_00142  
gaggccggtcgggttatttagtggccagggagaagaaggaagacttgcggtctgggtgctggatgcgcgtcccctc  
cggagtaaaagtgaccggaggggttggggaggcaggccggggcgggctttggaaggaggtctctgggacagactggag  
acgactagactcgaaaaggccggttttgcactccggaagccgagccagccaccgctgtcacgctctctctgctgt  
cccaggtccctcagaggatccagcagggggcgcaacaagagggcgaagaggtggcaccagggcgggcaggaagaggag  
cgggagcaggagcgggagcggagcgtcccaccgctgctgacttctggaggggaagggggcggggaatcggccct  
gagggaaagcggggtggcagggggtagccaagttccggctgcccgcactccctcggttccacgagaggaaagtt  
ttttttccagacgttccCGGCTCGCGCCCTCCGGGCCAGCCTCCCGAGCCTTCGGAGCGGGCGCCGTCCAGCCC  
AGCTCCGGGAAACGCGAGCCGCGATGCCTGGGGGTGCTCCCGGGCCCCGCCCGGGGACGGGCGTCTGCG  
GCTGGC  
GCGACTAGCGCTGGTACTCCTGGGCTGGGTCTCCTCGTCTTCTCCACCTCCTCGGCATC

>NM\_000376-Human-410DBTSS:NM\_000376chr12-4658487346585573hchr12\_01087  
agcagtaacaggttggcgagcggagcccgggatttcccattctgctggagctagccgagggtccagtcggcaggcggc  
cccagcgtcccggagcagcgaagtctggcctggtcagcccaggtgggggtgacgcacctggctcaggcgtccgagca  
ggctgggtagaaccacggcaggaagggtgggggctgcatccccgattaacacaggctgaagcgggtatccgacctata  
atcatcgacaactctgcccagagggcagaagcgtgcttgcctatggacgacggctgatgaaatctcagagta  
gagatctaaggctacagcgtggcctatagggtggtgattccaagtcaagatggttcagcgcacaacggagctcctggc  
aagagaggactggacctgtggcgggcgaggggcgggggcgggggcggggctgaccgagaggcggggcagggt  
gtgggctgtctctgttGTCAAAGGCGGCAGCGGAGCCGTGTGCGCCGGGAGCGCGGAACAGCTTGTCACCCGCCG  
G  
CCGACCAGGTGCGAACCCGGGAGCAGCGGAAAGGGGTCTCAGGATAGGGACTCGGGGTCGGGGCGTCTGG  
GATACCG



GGGCCTGAGCGCCCGGCTGCGAGCATTAGAGTCTAAGTCTCAGCGGTAAACTTGGCTACT

>NM\_000376-Human-411AB00215S02\_1chr12-4658488146585581hchr12\_01087  
cgttctgcagcagtaacagggtggcgagcggagcccggtattccattcgtgcggagctagcccggtgccagtcggc  
aggcgcggggcagcgtcccgcgagcagcaagtcctggcctggcagccagggtgggggtgacgcacctggctcaggcgt  
ccgcagcaggctgggtagaaccacggcaggaagggtggggggctgcatccccgattaacacaggctgaagcgggtatccg  
cacctataatcatcgacaactctgtcccacagaggcagaagcgtgccttgccctatggacgacggctgatgaaaatttc  
acgagttagatctctaaggctacagcgtggcctatagggtggtgattccaagtcaagatgggtgagcgcgaacggag  
ctcctggcaagagaggactggacctgtggcgggcgaggggcggggcccggggcggggcctgaccgagaggcgg  
ggccaggtgctgggctgtctCTGCTTGTCAAAAGGCGGCAGCGGAGCCGTGTGCGCCGGGAGCGCGGAACAGCTTGT  
CA  
CCCGCCGGCCGGACCAGGTGCGAACCCGGGAGCAGCGGAAAGGGGTCTCAGGATAGGGACTCGGGGTGGG  
GCGTCTG  
GGATACCGGGGCTGAGCGCCCGGCTGCGAGCATTAGAGTCTAAGTCTCAGCGGTAAACT

>NM\_000376-Human-412AB00215S03\_1chr12-4657980746580507hchr12\_01087  
tctcaggttgcagaagccatgctcttaacctgcatggaactctccacctctgattcatggatggccacagggcac  
ttagtgcctgtctgtacattatacaccgcagtaaatgtttatgagctgagaggttagatgtactaactagtgtgaac  
aagttgacctgagaacaggctggactgcccgaaggttactctggggcagctggcctctcagaaggaggctccctctg  
agcacttttagatcttcatgctctctggcagctctggcaccttactctggttaagaacaagaacccaacagaggtagg  
attgtgcagagaaattgtgtggaatcaaatatgactctaatagtctggaaggcaaataggaacaatcttcaaacaggc  
atctttattgaaaactactatgtgctgattgtcccattggccaatggggagctattctcactttgctacctttccct  
ctcctggctatcccttaaggGCTCCTGAACCTAGCCCAGCTGGACGGAGAAATGGACTCTAGCCTCCTCTGATAGCCTC  
A  
TGCCAGGCCCCGTGCACATTGCTTTGCTTGCTCCCTCAATCCTCATAGCTTCTCTTTGGGGTAAGTACAGTTA  
TGTCT  
CTAGCAGGCATAGTGGGGAACCAAGGTCTAAAGAGATGCAGCCACCTGCCAAGGCTGC

>NM\_000376-Human-413AB00215S04\_1chr12-4656262446563324hchr12\_01087  
cattcccagctctgtcggcaccctctctgcctctggggcagcgtctcccgtcttagcagcaggacacatggc  
ccagttgctctgctcctgagctgcctacaatctggagatggaggggtagtgagagtggttccctaacgaaaagg  
cccttctccctctgacaccctgggctgtgagaggagaaggagtgcctaggcgggaggctgttctctctgctggggc  
tggttgccgccaccgctcccactgctctgctactccctgcctcgaggaggccatcctggctgctgccagccgcca  
ccccacaccctgccagcagatgacatggcatgctctccaacaagccacttctgttgcagctactgatctggggac  
taaagtcctggaagagcctctctgcccacttcttagagactggggaggcggctcagcgtccgcttagataaaagg  
ttcccttctcattcagAAGCCTTTGGGTCTGAAGTGTCTGTGAGACCTCACAGAAGAGCACCCCTGGGCTCCACT  
ACCTGCCCCCTGCTCCTCAGGTAGGTGTTCTCATCAGCCGAACCTCCCTGGCTTTCTGTTTCAAGGGGC  
GGGGTG  
GGGGGGAGGGGCATAAGAAGGTGGTGGGCAGGGGAAGGAAGGGATACCACCCAGGATTTT

>NM\_000376-Human-414AY827085\_2chr12-4658687246587572hchr12\_01087  
ctagggagaagtaggtccagagacaattaggattacaacagaacacaggagaagtgaatctcatatgatgtgcttt  
ctactttcacaaaataaccttcttaagaataaaacaggcaaaaaaatctatctttgttcaatgtaaatacaagat  
ggttcattagcaggtgcaaacatgcaatatagaaaatgcatgctgctacaagaccagagaattgacagttccttct  
ggagatgtggaaaagcctgatggaataggcaggacctgaaaggagagggtctggagaggtggatgagagagaacagt  
tcaggtattgggggaatattgggaagaacatggttacagacaaggtgacggggctgatgacggcatgtgctggggaccgtg  
atgacatctataatcttgccatctgccaacgcagaacctgagttcttcaactctgtgaaaagtgcagcagggaaa  
ttttttttgttttttagaGGCAGCATGAAACAGTGGGATGTGCAGAGAGAAGATCTGGGTCCAGTAGCTCTGACTC  
CTCAGCTGTAGAAACCTTGACAACCTCTGCACATCAGTTGTACAATGGAACGGTATTTTTTACTCTTCATGTCT  
GAAAAGG  
CTATGATAAAGATCAAGTAAGATATTCAAAGAATTTTTAAATTATAAAGCAGTTTACAC

>NM\_000376-Human-415AY827085\_4chr12-4658450946585209hchr12\_01087  
agtcaagatgggttcagcgcgaacaggagctcctggcaagagaggactggacctgtggcgggcgaggggcgggcgggg  
gccggggcggggctgaccgagaggcgggccagggtgctgggctgtctgtctgtcaaaaggcggcagcggagccgtgt  
gcccgggagcgcggaacagcttgtccaccgcccggccggaccagggtgcaaacccgggagcagcgggaaaggggtctca  
ggatagggactcggggtcgggctgtgggataccgggctgagcggcggctgagcagcattagagctaaagctcagc  
ggtaacttggctactgaggtccgggctgtctgcatgaggctgggacactaaggggactgaggtttgagaaagctga  
agttcgtgccaggctggcgaggggagcagcagcatcctcggcgttaggagaaatgctccgtaacacagtgcttagcac  
ttgggcaacaagaagtattGTTTCCTTCTTCTGTCTGGGGCGCCTTGGCATGGAGTGGAGGAATAAGAAAAGGAGCGA  
TT  
GGCTGTGCATGGTGTCTCAGAACTGCTGGAGTGGAGGGTGTGTAACCTTATTTATTGTCTTACAGGGCCCAGGT  
ATGGTCA  
CCTGTGATGGTGGAGTTGGGTCTTTTAAGTAATTTTTTTTTTTTTTTTTTTTTTTTACT

>NM\_000376-Human-416HOMOVD2\_1chr12-4658687346587573hchr12\_01087  
gctagggagaagtaggtccagagacaattagggttacaacagaacacaggagaagtgaatctcatatgatgtgtctt  
tctactttcaaaaataaccttcttctaagaataaaacaggcaaaaaaatctatctttgtcaatgtaatacaaga  
tggttcattagcaggtgcaaacatgcaatatagaataatgcatgcgctacaaagaccagagaattgacagttcctttcc  
tggagatgttggaaaagcctgatggaataggcaggacctgaaagaggagagggtctggagaggtggatgagagagaacag  
ttcaggtattggggaatggaagaacatggttacagacaaggtgacgggctgatgacggcatgtgctggggacctg  
gatgacatctataatcttcccctctgcaaacgcagaacctctgagttctcaactctgtaaaagtgcagtgatggaa  
atTTTTTTTTTTTTtagAGGCAGCATGAAACAGTGGGATGTGCAGAGAGAAGATCTGGGTCCAGTAGCTCTGACACT  
CCTCAGCTGTAGAAACCTTGACAACCTGCACATCAGTTGTACAATGGAACGGTATTTTTTACTCTTCATGTC  
TGAAAAG  
GCTATGATAAAGATCAAGTAAGATATTCCAAAAGATTTTTTAAATTATAAAGCAGTTTACA

>NM\_000376-Human-417hchr12\_P022207chr12-4658546246586162hchr12\_01087  
caattcccaccccttcaccttgcctctgagccatggttctcctctgtaagaggcgaatagcaatatctcctctgg  
ctaaaggaggtcatcagctgctggatgatttgtgagcatttctattccagaagattatgttgaattactattatta  
tacattctcccactgcacagtgagttctaagaagagggaacccatcttttcaactgtcctctagcagatagagcggg  
cctatcacacagtcagggaagcagagaataacttaagcctcctctgctgagtttccgagccatccacaat  
tccaggtctcaggaggtagctttatctttcccctcagccgatccacggggcggggggggaaggcgaactcgggac  
cagggaccgggaagctgagactcagctcccttgggtgagattcgcgacaggccgggaacgtggtcagccggtcgctg  
ccaaggtgatatcgggtgggAGCAATGACGCAACTCCGGTTTCCACTTCGCCCCCGGGATATTTTACCCTAATCTG  
TG  
GGATCAGGCTGAGCTTCTGCGTCTTGCAGCAGTAACAGGTGGCGAGCGGAGCCCAGGATTTCCCATTCGT  
GCGGAGC  
TAGCCGCCGGTGCAGTCCGAGGCGCCCCCAGCGTCCCGCGGACGACGAAGTCTTGGC

>NM\_020547-Human-418AF074397\_1chr12+5210340752104107hchr12\_00812  
ttaaaaattcaggaagtttgtatacttctgattcttaagttgaaaacaaggtaaccttaatatgggctgtgaggc  
cttctctgccaagcagttgagatataaacctgaatataaagagatcttaggctagaaaggatcttgggagagctg  
aatggcttaagcattgacctcacattggttctcctgagaagagtcaacagagtcagcatcttccaaggtcag  
ggaagggcaagattgaaattagcatcactgggtctcagctgggctccaagttcccctcctcactatgcagagc  
aaagaggaggtgcagaagagaagagatagattggttctgctcctccttcttcccctgctttccccacacc  
accctctccccacagcagccttctccccacagaggctgggatagatgagggggcgagggtgggactgagggatca  
gaagccccaggatgcctgtATCTGAAGAAAGATTTGGCCAGGGCAGCTGTGCTGGCTTATGCTCTTCTCCTTCTGC  
TG  
CTGCCATCTCCAGCAAGATGCTAGGGTCTTTGGGGCTTTGGGCATTACTTCCCACAGCTGTGGAAGGTAAGT  
GTCTACA  
GGGAGGGGAAGGTCTCTCCATCCATCCAGCAAGGGAAGGGGCGCTTGAAGCAAGAGCC

>NM\_004051-Human-419DBTSS:NM\_004051chr3-198770947198771647hchr3\_00537

cgaactcctgacccaagtgatccacctgcctcagcctcccaaagtgtggaattacaggcgtgagccaccgccccggc  
ctttaaataaattcatctgatcaaaagaaatttaaaaaccaaccaaccctaagagctctaaagacagcaacacgcacag  
gacctggaaagagcctcttctcaccggagtttctcacttcaaggagcggcgcttcaccctccggcctcagcccgcg  
aggctgcaaccctttccgcacctggctccatctccctggccctcgcccccccagcggtcggggagcgagaaggcggcg  
ggggatctggcgcccgcttagggcgagacggcgcaccgggagcctagcgcagggcacctggcggggaggagcgc  
cagccgggacaccagcgggaggaggcggctcggcgccccccgacagccacgcccgtgagcccccccagcgtagcc  
ccagcgcgcttcgctgtAGAAGCGTCCGGGTGGCGGAGGCCGAGGCCGAGGAGTGCTGGTGGAGGGGCTTCCA  
GA  
AAGACCCTGCGGCAGCGCCCCCCTCGGCTCTCCCCGAGGAGAGCGGGCACCTGCGCGGCGCCGGGTGAAGGC  
GAGAGC  
CTCGGCAGCCCTCTGCAGCGGAGCCCCCTGCCATTTGGTTTTGGTAAGAGGAGGGGT

>NM\_004051-Human-420hchr3\_P013648chr3-198792772198793472hchr3\_00537  
tggtggtctttgttccagctctcccaatatccctattgtgcatcctcatgccccatactccttgacttccccta  
attgacccaactgtgtcctacatccttcatctcccagacctgacctaattgaggagagaggaagcaggatgttgag  
cgagggaaagctgaatttctctgactggagcctggctgcagaacctgaggaagtaggaggatgaagaagcaagaagc  
ttccagcaacctttagtcagcctcaagaagtctccggctaggaggcaatgctaaaccaggacaacctagagataccctgg  
ctggccagggcttctaaaaaacgtgttgcctgggtggttgccttaagaacacaccattaccagtgaaatctg  
ccgtgagtcagagagacgccctgaagacattacctggaggagataagctccccagcctccccacagccattcccc  
gtctctctctcagcttctTCATTTCTCCTCCTTCCAGTCTGGCCACTGGCTCAGGCCACAGCGGACACCCTGTTCA  
GCCTGCATCACCTCCTGAGACAGAACCTTCTCCAAGTGTTCCTTTGGCAGGTCCCAAGGTACCACCTGGA  
GCTGCT  
GGAAAGGGTAGTCCTGACAGCAACCCCTGGTGATCCGGTCTTGCTAGCTCCTCCCCG

>NM\_004051-Human-421hchr3\_P013669chr3-198748541198749241hchr3\_00537  
ttgatgtgaatctacaattttcaaaataaaaagtatgattgaagtaactctcaggaagcttagcctactgtggatta  
agacatcaaaattgcagcaggtttaaaaagctatactactacaaggatgttcaacttgaattagcttgaacatta  
cctatccatgtcatcttggaaagcagaaaatggaactttattggagtgggacactggatggccagggtttagcagagcct  
gccaacaaaagtagcttcagaattggctttattctcaggaaggctcttctggacagtggcaaacatagccatagcaaa  
tactggctcatttcatcagccagcaaccctggtgaaagaggccttactcagttgtaccagcaagctgtctccag  
gagccggggctggagagacaccagtgctgcttaggccagtggtgagggctgtctagtctgtcctgtactcacg  
gcttctttctcttcagcagaCGCCACTATTGCTTGGTTCTACTTCTTTATCCCGATTGGCCGTCCGACTTATGCCAGT  
GCGGGGAGCCGGTGAGTGGAAGCCAGCTACCCGGGAGCCAGTTGGATGGTCAGAACCCTTCTTCTGGGCC  
CCTAGGC  
CCTGAGCTACCCTCAGAGTGGGGCCCTTAGTGTTCAGGACACTGGGAGCCACTTCTCA

>NM\_004051-Human-422hchr3\_P90103chr3-198788303198789003hchr3\_00537  
caaggggtatggcttggccccacttctgaaatctgcctcagattcaaactgtaactcctcctgagctccagcctc  
ttctggaaatggcctatctaaaaaccacttggcattttgaaatcttctcaggtctgattctgggttatgctcagg  
gcagctctgaagatttctcatcctgttcaggccggttcttctgtaatttatgccacacatacctggcagggagagcta  
aagatggagttggtgggagctgcccttggcatcattgatttttaagtattcctaagcagcagcatctgtccttgatcc  
tctgctgtcagaaggccaaactcacagacatttaagcttaaaacaaacagttacaagctgttgaacttgcctgtgc  
aaggacaacacaaaaacatccaaggccacccccctgacccccactgtactgtcacacatatgtgagaatttcca  
ttctcagctaaaggcaagcaTTGAAAGAATACACAGAAAGCCTGGAAAAGGTTTCCAGGGGTGTCAATACGCCCTGTC  
AA  
CTGAGAATTAAGAGGATCCGGCTGGTCACTTGCTGGAGAGGATCCTGCATGCTGATAGTGCTGAGGCACCTG  
CCAGCTA  
AGGTGAGAGACAGCTGAACCTGAACATGTGGGCTGTCACTGAGAGCGGTCAGCAGAAGAA

>NM\_003507-Human-423hchr2\_P014510chr2+202722719202723419hchr2\_00467  
agagagagagacagaggaaagaggaggaggagagattgattgattttttctttccttcaacatgtcact  
ttctgcatgggaattcctgatattcctggcagccccggagagaggggagaggccccctggtgacttatgacccccgagg

agtaaccagagagcgcgcgagcgcgccagcgcctggctcaagacgaagatttaaccgagaacaaaagaacgtttgcaa  
tcagaaaacgctaccgagaacgaggataaccgccctttgtgtttgaaaactcttaattagcctggttctaagacgc  
attaaaacatttctacgcagatttctaatggaggatcaaatggttgcttctgcaacgaagatgggatcccgaaggac  
acgccgagaaccaaggcacacggggccactgagacgccggcgcgtctacagagtgcttctgggcgctcggtctcagg  
ttacttctagaaccagtctcCCCAAGCCGCTTTCGTTTCCTTAAAAACCTCGCTAGAGTCACCCCAGTTCCTCCAGACTCC  
AGGCCGTGCGCGGGGCGGGGTGGCCTGAGCCCGGGTTCCTCCGCTCTCCTGCTTCGGGCCCTTCCTCCGAGGG  
GTCCTT  
CCTCCCGCCGTCACCTCGGCCCCCTCCGCCGACTCGGGTTTTCTCCTCGGAGGCGGCCCT

>NM\_003507-Human-424hchr2\_P014518chr2+202723613202724313hchr2\_00467  
ctctccccgaaggcgctgcgctgctcctcccctcaaacgctggcgaaggcgcctcctcaggaatgcgcat  
ctgagtgaccaggaagaggaacaaatcttgaagcaaatcccttctgctgcttctcctgagcgaattcaggt  
aaaagttttccgaactttcctcccagtcccccgccctcccctcaggaatccgccagagcgcgacaccgcct  
ccgcaactcccgcgcccgccttccgacttccgccaatccgaaggcggccaccgaaaaaacaaggccgattggg  
cgccggggcctggggcggcccggagtggttgatgggggggaggggaggggaggggagggaggggaggggag  
ggaggggagggcggcccgggaaccccgagcccgacttcttctggcgaccagcgcgactccgagcgtagtcg  
gctactcccggcggcggcGGCGGCGGGCGGGCGGGCGCCAGGACTCGCTGCTGGGGCTGCGAGGGGCTGGAG  
GG  
GCCGGGGCCAGGCCGCGGGCAGGAGCGCCTCGCGTTTTCGGACGCAGTGTGACTGGGTTTCCAAAAAGAATC  
GCCGTGC  
TCCCGACTCCGGGGCCGAGATCGGACTCAGCAAGAGCCGGCCGTTTTGGCTGAAACTTGGG

>NM\_002511-Human-425hchr6\_P015964chr6-142451428142452128hchr6\_01280  
ccttaatctcagagattccaaagtcttgctggagctcctcctgcttgaggcgggtaaggatggatgtatatagg  
gcacacacacatgatggaggactgacctcccctcagttccacacaatacaacaggaactcacaacaagacaaagc  
tgtgggaaaagcaggttgcaggtgccccgcttagtcccgggattcagctcggcccctggacagcgcaggatgac  
ttctgcttctgggcgaagagtcggcaggtgcttactgatcccaaggacagctccttctcctgaaaggctgt  
ttcgctagataaccgcgagaacaaacctgaatacgaacaaagacgcaaccgcttgctttttttttttaatt  
taaattcagagtagccggagcattccccctctagaagcggagcggcggagtggttgacagaccctcccaggtc  
ctgaactcttaggagcgtgTGCTGTGAGGCTTGCCCCGCGACAGTAAACTTGACGGGGGAGAGGGAGGGACATCG  
AT  
TAAACCTAAATCGTGGGCGTTCAGTCTCAGGGCACCAGCGCGTGAAAACCTCCAGCGGACTCTGCTGAAA  
GGAGATC  
ATGCCCTCTAAGTCTCTTTCCAACCTCTCGGTGACCACCGGCGCAATGAGAGCGGTTCC
