# Supplementary material
Source: PubMed Central journal article supplement (PMC2835043)
Supplement: mt2009182x3.pdf [file mt2009182x3.pdf]

Table S3

[Click here to download Supplemental Table: Supplementary methods.pdf](#)

| Promoter        | FW primer 5' → 3'           | RV Primer 5' → 3'               | Amplicon    |
|-----------------|-----------------------------|---------------------------------|-------------|
| <i>Chi3l1</i>   | GTCGAC cctctggaaacagccaagag | GCTAGC GGCTTCTCCTAGTACCCAGT     | -434 / + 44 |
| <i>Cxcl1</i>    | GTCGAC agttggcaaaagcaaaccac | GCTAGC GAGTCTGGAGTGCTGGAAC      | -455 / +43  |
| <i>Cxcl5</i>    | GTCGAC aggaaaagaagggcatcctc | GCTAGC TGTGGAGATTGGGGCTCTA      | -319 / +31  |
| <i>Has1</i>     | GTCGAC gtgaaacacatgccagcaac | TCTAGA GGGTCTCCTGGATTCTCTC      | -468 / +54  |
| <i>IL-1beta</i> | GTCGAC cctacctttgttccgcacat | GCTAGC CTGGAGAGGATCCCAGATGA     | - 350 / +53 |
| <i>Mmp13</i>    | GTCGAC ttctgaggccttcaaggaaa | GCTAGC GCAGTGCCTGGAGTCTCTC      | -486 / +19  |
| <i>Mmp3</i>     | GTCGAC tattcagcttgggcttctgg | GCTAGC AGGTTCTCTGCTGCCTCCTT     | -363 / +19  |
| <i>Saa3</i>     | GTCGAC ttggattggatcccatgatt | TCTAGA GCTAGCGTGCTGCGAGCTCCTTCT | -314 / +53  |
| <i>Timp1</i>    | GTCGAC ctgacaccctcaccagaat  | GCTAGC GTCTCTAGGAGCCCCGATCT     | -400 / +29  |
| <i>Tnfaip6</i>  | GTCGAC ctgggtttgccaagctacat | GCTAGC GTTGCAGAGCCGGTTACAAT     | -499 / +63  |
